# Supplementary material for: High-throughput cultivation and identification of bacteria from the plant root microbiota
Source: Springer Nature journal article supplement (doi:10.1038/s41596-020-00444-7), 2021-01-13
Supplement: MOESM2 [file 41596_2020_444_MOESM2_ESM17.xlsx]

## Sheet: Supplementary Table 1
Supplementary Table 1 | Primer sequences used for bacterial identification.
16S rRNA gene primers 799F and 1193R are in gray. Well and plate barcodes are in red and blue, respectively. Illumina adapters (P5 and Read1, P7, Index and Read2) are in gray.
Primers for Sanger sequencing
27F	AGAGTTTGATCCTGGCTCAG
1492R	TACGGCTACCTTGTTACGACTT
First step primers for high throughput identification
799F	AACMGGATTAGATACCCKG
1193R	ACGTCATCCCCACCTTCC
Second step primers for high throughput ientification
Forward barcoded primer
Well in the plate	Primer ID	Illumina adapter (P5 + Read1) + Barcode (well) + 799F
A1	F1	AATGATACGGCGACCACCGAGATCTACACTCTTTCCCTACACGACGCTCTTCCGATCTACGCTCGACAAACMGGATTAGATACCCKG
A2	F2	AATGATACGGCGACCACCGAGATCTACACTCTTTCCCTACACGACGCTCTTCCGATCTAGACGCACTCAACMGGATTAGATACCCKG
A3	F3	AATGATACGGCGACCACCGAGATCTACACTCTTTCCCTACACGACGCTCTTCCGATCTAGCACTGTAGAACMGGATTAGATACCCKG
A4	F4	AATGATACGGCGACCACCGAGATCTACACTCTTTCCCTACACGACGCTCTTCCGATCTATCAGACACGAACMGGATTAGATACCCKG
A5	F5	AATGATACGGCGACCACCGAGATCTACACTCTTTCCCTACACGACGCTCTTCCGATCTATATCGCGAGAACMGGATTAGATACCCKG
A6	F6	AATGATACGGCGACCACCGAGATCTACACTCTTTCCCTACACGACGCTCTTCCGATCTCACGAGACAGAACMGGATTAGATACCCKG
A7	F7	AATGATACGGCGACCACCGAGATCTACACTCTTTCCCTACACGACGCTCTTCCGATCTCTCGCGTGTCAACMGGATTAGATACCCKG
A8	F8	AATGATACGGCGACCACCGAGATCTACACTCTTTCCCTACACGACGCTCTTCCGATCTTAGTATCAGCAACMGGATTAGATACCCKG
A9	F9	AATGATACGGCGACCACCGAGATCTACACTCTTTCCCTACACGACGCTCTTCCGATCTTCTCTATGCGAACMGGATTAGATACCCKG
A10	F10	AATGATACGGCGACCACCGAGATCTACACTCTTTCCCTACACGACGCTCTTCCGATCTTGATACGTCTAACMGGATTAGATACCCKG
A11	F11	AATGATACGGCGACCACCGAGATCTACACTCTTTCCCTACACGACGCTCTTCCGATCTTACTGAGCTAAACMGGATTAGATACCCKG
A12	F12	AATGATACGGCGACCACCGAGATCTACACTCTTTCCCTACACGACGCTCTTCCGATCTCATAGTAGTGAACMGGATTAGATACCCKG
B1	F13	AATGATACGGCGACCACCGAGATCTACACTCTTTCCCTACACGACGCTCTTCCGATCTCGAGAGATACAACMGGATTAGATACCCKG
B2	F14	AATGATACGGCGACCACCGAGATCTACACTCTTTCCCTACACGACGCTCTTCCGATCTATACGACGTAAACMGGATTAGATACCCKG
B3	F15	AATGATACGGCGACCACCGAGATCTACACTCTTTCCCTACACGACGCTCTTCCGATCTTCACGTACTAAACMGGATTAGATACCCKG
B4	F16	AATGATACGGCGACCACCGAGATCTACACTCTTTCCCTACACGACGCTCTTCCGATCTCGTCTAGTACAACMGGATTAGATACCCKG
B5	F17	AATGATACGGCGACCACCGAGATCTACACTCTTTCCCTACACGACGCTCTTCCGATCTTCTACGTAGCAACMGGATTAGATACCCKG
B6	F18	AATGATACGGCGACCACCGAGATCTACACTCTTTCCCTACACGACGCTCTTCCGATCTCACGCGAGTCAACMGGATTAGATACCCKG
B7	F19	AATGATACGGCGACCACCGAGATCTACACTCTTTCCCTACACGACGCTCTTCCGATCTACGACTACAGAACMGGATTAGATACCCKG
B8	F20	AATGATACGGCGACCACCGAGATCTACACTCTTTCCCTACACGACGCTCTTCCGATCTCGTAGACTAGAACMGGATTAGATACCCKG
B9	F21	AATGATACGGCGACCACCGAGATCTACACTCTTTCCCTACACGACGCTCTTCCGATCTTACGAGTATGAACMGGATTAGATACCCKG
B10	F22	AATGATACGGCGACCACCGAGATCTACACTCTTTCCCTACACGACGCTCTTCCGATCTTACTCTCGTGAACMGGATTAGATACCCKG
B11	F23	AATGATACGGCGACCACCGAGATCTACACTCTTTCCCTACACGACGCTCTTCCGATCTTAGAGACGAGAACMGGATTAGATACCCKG
B12	F24	AATGATACGGCGACCACCGAGATCTACACTCTTTCCCTACACGACGCTCTTCCGATCTTCGTCGCTCGAACMGGATTAGATACCCKG
C1	F25	AATGATACGGCGACCACCGAGATCTACACTCTTTCCCTACACGACGCTCTTCCGATCTACATACGCGTAACMGGATTAGATACCCKG
C2	F26	AATGATACGGCGACCACCGAGATCTACACTCTTTCCCTACACGACGCTCTTCCGATCTACGCGAGTATAACMGGATTAGATACCCKG
C3	F27	AATGATACGGCGACCACCGAGATCTACACTCTTTCCCTACACGACGCTCTTCCGATCTACTACTATGTAACMGGATTAGATACCCKG
C4	F28	AATGATACGGCGACCACCGAGATCTACACTCTTTCCCTACACGACGCTCTTCCGATCTACTGTACAGTAACMGGATTAGATACCCKG
C5	F29	AATGATACGGCGACCACCGAGATCTACACTCTTTCCCTACACGACGCTCTTCCGATCTAGACTATACTAACMGGATTAGATACCCKG
C6	F30	AATGATACGGCGACCACCGAGATCTACACTCTTTCCCTACACGACGCTCTTCCGATCTAGCGTCGTCTAACMGGATTAGATACCCKG
C7	F31	AATGATACGGCGACCACCGAGATCTACACTCTTTCCCTACACGACGCTCTTCCGATCTAGTACGCTATAACMGGATTAGATACCCKG
C8	F32	AATGATACGGCGACCACCGAGATCTACACTCTTTCCCTACACGACGCTCTTCCGATCTCACGCTACGAAACMGGATTAGATACCCKG
C9	F33	AATGATACGGCGACCACCGAGATCTACACTCTTTCCCTACACGACGCTCTTCCGATCTCACGCTACGTAACMGGATTAGATACCCKG
C10	F34	AATGATACGGCGACCACCGAGATCTACACTCTTTCCCTACACGACGCTCTTCCGATCTCAGTAGACGTAACMGGATTAGATACCCKG
C11	F35	AATGATACGGCGACCACCGAGATCTACACTCTTTCCCTACACGACGCTCTTCCGATCTCGACGTGACTAACMGGATTAGATACCCKG
C12	F36	AATGATACGGCGACCACCGAGATCTACACTCTTTCCCTACACGACGCTCTTCCGATCTCAGTCTCTAGAACMGGATTAGATACCCKG
D1	F37	AATGATACGGCGACCACCGAGATCTACACTCTTTCCCTACACGACGCTCTTCCGATCTTACACGTGATAACMGGATTAGATACCCKG
D2	F38	AATGATACGGCGACCACCGAGATCTACACTCTTTCCCTACACGACGCTCTTCCGATCTTACAGATCGTAACMGGATTAGATACCCKG
D3	F39	AATGATACGGCGACCACCGAGATCTACACTCTTTCCCTACACGACGCTCTTCCGATCTTACGCTGTCTAACMGGATTAGATACCCKG
D4	F40	AATGATACGGCGACCACCGAGATCTACACTCTTTCCCTACACGACGCTCTTCCGATCTTAGTGTAGATAACMGGATTAGATACCCKG
D5	F41	AATGATACGGCGACCACCGAGATCTACACTCTTTCCCTACACGACGCTCTTCCGATCTTCGATCACGTAACMGGATTAGATACCCKG
D6	F42	AATGATACGGCGACCACCGAGATCTACACTCTTTCCCTACACGACGCTCTTCCGATCTTCGCACTAGTAACMGGATTAGATACCCKG
D7	F43	AATGATACGGCGACCACCGAGATCTACACTCTTTCCCTACACGACGCTCTTCCGATCTTCTAGCGACTAACMGGATTAGATACCCKG
D8	F44	AATGATACGGCGACCACCGAGATCTACACTCTTTCCCTACACGACGCTCTTCCGATCTCACGTGTATAAACMGGATTAGATACCCKG
D9	F45	AATGATACGGCGACCACCGAGATCTACACTCTTTCCCTACACGACGCTCTTCCGATCTTGACGTATGTAACMGGATTAGATACCCKG
D10	F46	AATGATACGGCGACCACCGAGATCTACACTCTTTCCCTACACGACGCTCTTCCGATCTCACTACGATGAACMGGATTAGATACCCKG
D11	F47	AATGATACGGCGACCACCGAGATCTACACTCTTTCCCTACACGACGCTCTTCCGATCTACAGTATATAAACMGGATTAGATACCCKG
D12	F48	AATGATACGGCGACCACCGAGATCTACACTCTTTCCCTACACGACGCTCTTCCGATCTACGCGATCGAAACMGGATTAGATACCCKG
E1	F49	AATGATACGGCGACCACCGAGATCTACACTCTTTCCCTACACGACGCTCTTCCGATCTACTAGCAGTAAACMGGATTAGATACCCKG
E2	F50	AATGATACGGCGACCACCGAGATCTACACTCTTTCCCTACACGACGCTCTTCCGATCTAGCTCACGTAAACMGGATTAGATACCCKG
E3	F51	AATGATACGGCGACCACCGAGATCTACACTCTTTCCCTACACGACGCTCTTCCGATCTAGTATACATAAACMGGATTAGATACCCKG
E4	F52	AATGATACGGCGACCACCGAGATCTACACTCTTTCCCTACACGACGCTCTTCCGATCTAGTCGAGAGAAACMGGATTAGATACCCKG
E5	F53	AATGATACGGCGACCACCGAGATCTACACTCTTTCCCTACACGACGCTCTTCCGATCTAGTGCTACGAAACMGGATTAGATACCCKG
E6	F54	AATGATACGGCGACCACCGAGATCTACACTCTTTCCCTACACGACGCTCTTCCGATCTCGATCGTATAAACMGGATTAGATACCCKG
E7	F55	AATGATACGGCGACCACCGAGATCTACACTCTTTCCCTACACGACGCTCTTCCGATCTCGCAGTACGAAACMGGATTAGATACCCKG
E8	F56	AATGATACGGCGACCACCGAGATCTACACTCTTTCCCTACACGACGCTCTTCCGATCTCGCGTATACAAACMGGATTAGATACCCKG
E9	F57	AATGATACGGCGACCACCGAGATCTACACTCTTTCCCTACACGACGCTCTTCCGATCTCGTACAGTCAAACMGGATTAGATACCCKG
E10	F58	AATGATACGGCGACCACCGAGATCTACACTCTTTCCCTACACGACGCTCTTCCGATCTCGTACTCAGAAACMGGATTAGATACCCKG
E11	F59	AATGATACGGCGACCACCGAGATCTACACTCTTTCCCTACACGACGCTCTTCCGATCTCTACGCTCTAAACMGGATTAGATACCCKG
E12	F60	AATGATACGGCGACCACCGAGATCTACACTCTTTCCCTACACGACGCTCTTCCGATCTCTATAGCGTAAACMGGATTAGATACCCKG
F1	F61	AATGATACGGCGACCACCGAGATCTACACTCTTTCCCTACACGACGCTCTTCCGATCTTACGTCATCAAACMGGATTAGATACCCKG
F2	F62	AATGATACGGCGACCACCGAGATCTACACTCTTTCCCTACACGACGCTCTTCCGATCTTAGTCGCATAAACMGGATTAGATACCCKG
F3	F63	AATGATACGGCGACCACCGAGATCTACACTCTTTCCCTACACGACGCTCTTCCGATCTTATATATACAAACMGGATTAGATACCCKG
F4	F64	AATGATACGGCGACCACCGAGATCTACACTCTTTCCCTACACGACGCTCTTCCGATCTTATGCTAGTAAACMGGATTAGATACCCKG
F5	F65	AATGATACGGCGACCACCGAGATCTACACTCTTTCCCTACACGACGCTCTTCCGATCTTCACGCGAGAAACMGGATTAGATACCCKG
F6	F66	AATGATACGGCGACCACCGAGATCTACACTCTTTCCCTACACGACGCTCTTCCGATCTTCGATAGTGAAACMGGATTAGATACCCKG
F7	F67	AATGATACGGCGACCACCGAGATCTACACTCTTTCCCTACACGACGCTCTTCCGATCTTCGCTGCGTAAACMGGATTAGATACCCKG
F8	F68	AATGATACGGCGACCACCGAGATCTACACTCTTTCCCTACACGACGCTCTTCCGATCTTCTGACGTCAAACMGGATTAGATACCCKG
F9	F69	AATGATACGGCGACCACCGAGATCTACACTCTTTCCCTACACGACGCTCTTCCGATCTTGAGTCAGTAAACMGGATTAGATACCCKG
F10	F70	AATGATACGGCGACCACCGAGATCTACACTCTTTCCCTACACGACGCTCTTCCGATCTCACTATACTCAACMGGATTAGATACCCKG
F11	F71	AATGATACGGCGACCACCGAGATCTACACTCTTTCCCTACACGACGCTCTTCCGATCTTGTCACACGAAACMGGATTAGATACCCKG
F12	F72	AATGATACGGCGACCACCGAGATCTACACTCTTTCCCTACACGACGCTCTTCCGATCTTGTCGTCGCAAACMGGATTAGATACCCKG
G1	F73	AATGATACGGCGACCACCGAGATCTACACTCTTTCCCTACACGACGCTCTTCCGATCTACACATACGCAACMGGATTAGATACCCKG
G2	F74	AATGATACGGCGACCACCGAGATCTACACTCTTTCCCTACACGACGCTCTTCCGATCTACAGTCGTGCAACMGGATTAGATACCCKG
G3	F75	AATGATACGGCGACCACCGAGATCTACACTCTTTCCCTACACGACGCTCTTCCGATCTACATGACGACAACMGGATTAGATACCCKG
G4	F76	AATGATACGGCGACCACCGAGATCTACACTCTTTCCCTACACGACGCTCTTCCGATCTACGACAGCTCAACMGGATTAGATACCCKG
G5	F77	AATGATACGGCGACCACCGAGATCTACACTCTTTCCCTACACGACGCTCTTCCGATCTACGTCTCATCAACMGGATTAGATACCCKG
G6	F78	AATGATACGGCGACCACCGAGATCTACACTCTTTCCCTACACGACGCTCTTCCGATCTACTCATCTACAACMGGATTAGATACCCKG
G7	F79	AATGATACGGCGACCACCGAGATCTACACTCTTTCCCTACACGACGCTCTTCCGATCTACTCGCGCACAACMGGATTAGATACCCKG
G8	F80	AATGATACGGCGACCACCGAGATCTACACTCTTTCCCTACACGACGCTCTTCCGATCTAGAGCGTCACAACMGGATTAGATACCCKG
G9	F81	AATGATACGGCGACCACCGAGATCTACACTCTTTCCCTACACGACGCTCTTCCGATCTAGCGACTAGCAACMGGATTAGATACCCKG
G10	F82	AATGATACGGCGACCACCGAGATCTACACTCTTTCCCTACACGACGCTCTTCCGATCTCAGCGTACTGAACMGGATTAGATACCCKG
G11	F83	AATGATACGGCGACCACCGAGATCTACACTCTTTCCCTACACGACGCTCTTCCGATCTAGTGACACACAACMGGATTAGATACCCKG
G12	F84	AATGATACGGCGACCACCGAGATCTACACTCTTTCCCTACACGACGCTCTTCCGATCTAGTGTATGTCAACMGGATTAGATACCCKG
H1	F85	AATGATACGGCGACCACCGAGATCTACACTCTTTCCCTACACGACGCTCTTCCGATCTATAGATAGACAACMGGATTAGATACCCKG
H2	F86	AATGATACGGCGACCACCGAGATCTACACTCTTTCCCTACACGACGCTCTTCCGATCTATATAGTCGCAACMGGATTAGATACCCKG
H3	F87	AATGATACGGCGACCACCGAGATCTACACTCTTTCCCTACACGACGCTCTTCCGATCTATCTACTGACAACMGGATTAGATACCCKG
H4	F88	AATGATACGGCGACCACCGAGATCTACACTCTTTCCCTACACGACGCTCTTCCGATCTCACGTAGATCAACMGGATTAGATACCCKG
H5	F89	AATGATACGGCGACCACCGAGATCTACACTCTTTCCCTACACGACGCTCTTCCGATCTCACGTCTCGCAACMGGATTAGATACCCKG
H6	F90	AATGATACGGCGACCACCGAGATCTACACTCTTTCCCTACACGACGCTCTTCCGATCTCATACTCTACAACMGGATTAGATACCCKG
H7	F91	AATGATACGGCGACCACCGAGATCTACACTCTTTCCCTACACGACGCTCTTCCGATCTCGACACTATCAACMGGATTAGATACCCKG
H8	F92	AATGATACGGCGACCACCGAGATCTACACTCTTTCCCTACACGACGCTCTTCCGATCTCGAGACGCGCAACMGGATTAGATACCCKG
H9	F93	AATGATACGGCGACCACCGAGATCTACACTCTTTCCCTACACGACGCTCTTCCGATCTCGTATGCGACAACMGGATTAGATACCCKG
H10	F94	AATGATACGGCGACCACCGAGATCTACACTCTTTCCCTACACGACGCTCTTCCGATCTCGTCGATCTCAACMGGATTAGATACCCKG
H11	F95	AATGATACGGCGACCACCGAGATCTACACTCTTTCCCTACACGACGCTCTTCCGATCTCTACGACTGCAACMGGATTAGATACCCKG
H12	F96	AATGATACGGCGACCACCGAGATCTACACTCTTTCCCTACACGACGCTCTTCCGATCTCTAGTCACTCAACMGGATTAGATACCCKG
Reverse barcoded primer
Plate ID	Primer ID	Illumina adapter (P7 + Index + Read2) + Barcode (Plate) + 1193R
1	R1	CAAGCAGAAGACGGCATACGAGATCGTGATGTGACTGGAGTTCAGACGTGTGCTCTTCCGATCTATCACGACGTCATCCCCACCTTCC
2	R2	CAAGCAGAAGACGGCATACGAGATCGTGATGTGACTGGAGTTCAGACGTGTGCTCTTCCGATCTAGAGTCACGTCATCCCCACCTTCC
3	R3	CAAGCAGAAGACGGCATACGAGATCGTGATGTGACTGGAGTTCAGACGTGTGCTCTTCCGATCTTTAGGCACGTCATCCCCACCTTCC
4	R4	CAAGCAGAAGACGGCATACGAGATCGTGATGTGACTGGAGTTCAGACGTGTGCTCTTCCGATCTTGACCAACGTCATCCCCACCTTCC
5	R5	CAAGCAGAAGACGGCATACGAGATCGTGATGTGACTGGAGTTCAGACGTGTGCTCTTCCGATCTACAGTGACGTCATCCCCACCTTCC
6	R6	CAAGCAGAAGACGGCATACGAGATCGTGATGTGACTGGAGTTCAGACGTGTGCTCTTCCGATCTGCCAATACGTCATCCCCACCTTCC
7	R7	CAAGCAGAAGACGGCATACGAGATCGTGATGTGACTGGAGTTCAGACGTGTGCTCTTCCGATCTCAGATCACGTCATCCCCACCTTCC
8	R8	CAAGCAGAAGACGGCATACGAGATCGTGATGTGACTGGAGTTCAGACGTGTGCTCTTCCGATCTACTTGAACGTCATCCCCACCTTCC
9	R9	CAAGCAGAAGACGGCATACGAGATCGTGATGTGACTGGAGTTCAGACGTGTGCTCTTCCGATCTGATCAGACGTCATCCCCACCTTCC
10	R10	CAAGCAGAAGACGGCATACGAGATCGTGATGTGACTGGAGTTCAGACGTGTGCTCTTCCGATCTTAGCTTACGTCATCCCCACCTTCC
11	R11	CAAGCAGAAGACGGCATACGAGATCGTGATGTGACTGGAGTTCAGACGTGTGCTCTTCCGATCTGGCTACACGTCATCCCCACCTTCC
12	R12	CAAGCAGAAGACGGCATACGAGATCGTGATGTGACTGGAGTTCAGACGTGTGCTCTTCCGATCTCGCGCGACGTCATCCCCACCTTCC
13	R13	CAAGCAGAAGACGGCATACGAGATCGTGATGTGACTGGAGTTCAGACGTGTGCTCTTCCGATCTAGTCAAACGTCATCCCCACCTTCC
14	R14	CAAGCAGAAGACGGCATACGAGATCGTGATGTGACTGGAGTTCAGACGTGTGCTCTTCCGATCTAGTTCCACGTCATCCCCACCTTCC
15	R15	CAAGCAGAAGACGGCATACGAGATCGTGATGTGACTGGAGTTCAGACGTGTGCTCTTCCGATCTATGTCAACGTCATCCCCACCTTCC
16	R16	CAAGCAGAAGACGGCATACGAGATCGTGATGTGACTGGAGTTCAGACGTGTGCTCTTCCGATCTCCGTCCACGTCATCCCCACCTTCC
17	R17	CAAGCAGAAGACGGCATACGAGATCGTGATGTGACTGGAGTTCAGACGTGTGCTCTTCCGATCTTCTCTCACGTCATCCCCACCTTCC
18	R18	CAAGCAGAAGACGGCATACGAGATCGTGATGTGACTGGAGTTCAGACGTGTGCTCTTCCGATCTGTCCGCACGTCATCCCCACCTTCC
19	R19	CAAGCAGAAGACGGCATACGAGATCGTGATGTGACTGGAGTTCAGACGTGTGCTCTTCCGATCTGTGAAAACGTCATCCCCACCTTCC
20	R20	CAAGCAGAAGACGGCATACGAGATCGTGATGTGACTGGAGTTCAGACGTGTGCTCTTCCGATCTGTGGCCACGTCATCCCCACCTTCC
21	R21	CAAGCAGAAGACGGCATACGAGATCGTGATGTGACTGGAGTTCAGACGTGTGCTCTTCCGATCTGTTTCGACGTCATCCCCACCTTCC
22	R22	CAAGCAGAAGACGGCATACGAGATCGTGATGTGACTGGAGTTCAGACGTGTGCTCTTCCGATCTCGTACGACGTCATCCCCACCTTCC
23	R23	CAAGCAGAAGACGGCATACGAGATCGTGATGTGACTGGAGTTCAGACGTGTGCTCTTCCGATCTGAGTGGACGTCATCCCCACCTTCC
24	R24	CAAGCAGAAGACGGCATACGAGATCGTGATGTGACTGGAGTTCAGACGTGTGCTCTTCCGATCTGGTAGCACGTCATCCCCACCTTCC
25	R25	CAAGCAGAAGACGGCATACGAGATCGTGATGTGACTGGAGTTCAGACGTGTGCTCTTCCGATCTACTGATACGTCATCCCCACCTTCC
26	R26	CAAGCAGAAGACGGCATACGAGATCGTGATGTGACTGGAGTTCAGACGTGTGCTCTTCCGATCTATGAGCACGTCATCCCCACCTTCC
27	R27	CAAGCAGAAGACGGCATACGAGATCGTGATGTGACTGGAGTTCAGACGTGTGCTCTTCCGATCTATTCCTACGTCATCCCCACCTTCC
28	R28	CAAGCAGAAGACGGCATACGAGATCGTGATGTGACTGGAGTTCAGACGTGTGCTCTTCCGATCTCAAAAGACGTCATCCCCACCTTCC
29	R29	CAAGCAGAAGACGGCATACGAGATCGTGATGTGACTGGAGTTCAGACGTGTGCTCTTCCGATCTCAACTAACGTCATCCCCACCTTCC
30	R30	CAAGCAGAAGACGGCATACGAGATCGTGATGTGACTGGAGTTCAGACGTGTGCTCTTCCGATCTCACCGGACGTCATCCCCACCTTCC
31	R31	CAAGCAGAAGACGGCATACGAGATCGTGATGTGACTGGAGTTCAGACGTGTGCTCTTCCGATCTCACGATACGTCATCCCCACCTTCC
32	R32	CAAGCAGAAGACGGCATACGAGATCGTGATGTGACTGGAGTTCAGACGTGTGCTCTTCCGATCTCACTCAACGTCATCCCCACCTTCC
33	R33	CAAGCAGAAGACGGCATACGAGATCGTGATGTGACTGGAGTTCAGACGTGTGCTCTTCCGATCTCAGGCGACGTCATCCCCACCTTCC
34	R34	CAAGCAGAAGACGGCATACGAGATCGTGATGTGACTGGAGTTCAGACGTGTGCTCTTCCGATCTCATGGCACGTCATCCCCACCTTCC
35	R35	CAAGCAGAAGACGGCATACGAGATCGTGATGTGACTGGAGTTCAGACGTGTGCTCTTCCGATCTCATTTTACGTCATCCCCACCTTCC
36	R36	CAAGCAGAAGACGGCATACGAGATCGTGATGTGACTGGAGTTCAGACGTGTGCTCTTCCGATCTCCAACAACGTCATCCCCACCTTCC
37	R37	CAAGCAGAAGACGGCATACGAGATCGTGATGTGACTGGAGTTCAGACGTGTGCTCTTCCGATCTCGGAATACGTCATCCCCACCTTCC
38	R38	CAAGCAGAAGACGGCATACGAGATCGTGATGTGACTGGAGTTCAGACGTGTGCTCTTCCGATCTCTAGCTACGTCATCCCCACCTTCC
39	R39	CAAGCAGAAGACGGCATACGAGATCGTGATGTGACTGGAGTTCAGACGTGTGCTCTTCCGATCTCTATACACGTCATCCCCACCTTCC
40	R40	CAAGCAGAAGACGGCATACGAGATCGTGATGTGACTGGAGTTCAGACGTGTGCTCTTCCGATCTCTCAGAACGTCATCCCCACCTTCC
41	R41	CAAGCAGAAGACGGCATACGAGATCGTGATGTGACTGGAGTTCAGACGTGTGCTCTTCCGATCTGACGACACGTCATCCCCACCTTCC
42	R42	CAAGCAGAAGACGGCATACGAGATCGTGATGTGACTGGAGTTCAGACGTGTGCTCTTCCGATCTTAATCGACGTCATCCCCACCTTCC
43	R43	CAAGCAGAAGACGGCATACGAGATCGTGATGTGACTGGAGTTCAGACGTGTGCTCTTCCGATCTTACAGCACGTCATCCCCACCTTCC
44	R44	CAAGCAGAAGACGGCATACGAGATCGTGATGTGACTGGAGTTCAGACGTGTGCTCTTCCGATCTTATAATACGTCATCCCCACCTTCC
45	R45	CAAGCAGAAGACGGCATACGAGATCGTGATGTGACTGGAGTTCAGACGTGTGCTCTTCCGATCTTCATTCACGTCATCCCCACCTTCC
46	R46	CAAGCAGAAGACGGCATACGAGATCGTGATGTGACTGGAGTTCAGACGTGTGCTCTTCCGATCTTCCCGAACGTCATCCCCACCTTCC
47	R47	CAAGCAGAAGACGGCATACGAGATCGTGATGTGACTGGAGTTCAGACGTGTGCTCTTCCGATCTTCGAAGACGTCATCCCCACCTTCC
48	R48	CAAGCAGAAGACGGCATACGAGATCGTGATGTGACTGGAGTTCAGACGTGTGCTCTTCCGATCTTCGGCAACGTCATCCCCACCTTCC
