# Supplementary material for: High-throughput cultivation and identification of bacteria from the plant root microbiota
Source: Springer Nature journal article supplement (doi:10.1038/s41596-020-00444-7), 2021-01-13
Supplement: MOESM3 [file 41596_2020_444_MOESM3_ESM18.xlsx]

## Sheet: Supplementary Table 2
Supplementary Table 2 | Mapping file.
#SampleID	BarcodeSequence	LinkerPrimerSequence	ReversePrimer	barcodeF	barcodeR	library	plate	well	variety	compartment	medium	batch	species	Description
L1P01A1	ACGCTCGACAATCACG	AACMGGATTAGATACCCKG	ACGTCATCCCCACCTTCC	ACGCTCGACA	ATCACG	L1	P01	A1	Nippobare	Root	TSB	1	Rice	WildType
L1P01A2	AGACGCACTCATCACG	AACMGGATTAGATACCCKG	ACGTCATCCCCACCTTCC	AGACGCACTC	ATCACG	L1	P01	A2	Nippobare	Root	TSB	1	Rice	WildType
L1P01A3	AGCACTGTAGATCACG	AACMGGATTAGATACCCKG	ACGTCATCCCCACCTTCC	AGCACTGTAG	ATCACG	L1	P01	A3	Nippobare	Root	TSB	1	Rice	WildType
L1P01A4	ATCAGACACGATCACG	AACMGGATTAGATACCCKG	ACGTCATCCCCACCTTCC	ATCAGACACG	ATCACG	L1	P01	A4	Nippobare	Root	TSB	1	Rice	WildType
L1P01A5	ATATCGCGAGATCACG	AACMGGATTAGATACCCKG	ACGTCATCCCCACCTTCC	ATATCGCGAG	ATCACG	L1	P01	A5	Nippobare	Root	TSB	1	Rice	WildType
L1P01A6	CACGAGACAGATCACG	AACMGGATTAGATACCCKG	ACGTCATCCCCACCTTCC	CACGAGACAG	ATCACG	L1	P01	A6	Nippobare	Root	TSB	1	Rice	WildType
L1P01A7	CTCGCGTGTCATCACG	AACMGGATTAGATACCCKG	ACGTCATCCCCACCTTCC	CTCGCGTGTC	ATCACG	L1	P01	A7	Nippobare	Root	TSB	1	Rice	WildType
L1P01A8	TAGTATCAGCATCACG	AACMGGATTAGATACCCKG	ACGTCATCCCCACCTTCC	TAGTATCAGC	ATCACG	L1	P01	A8	Nippobare	Root	TSB	1	Rice	WildType
L1P01A9	TCTCTATGCGATCACG	AACMGGATTAGATACCCKG	ACGTCATCCCCACCTTCC	TCTCTATGCG	ATCACG	L1	P01	A9	Nippobare	Root	TSB	1	Rice	WildType
L1P01A10	TGATACGTCTATCACG	AACMGGATTAGATACCCKG	ACGTCATCCCCACCTTCC	TGATACGTCT	ATCACG	L1	P01	A10	Nippobare	Root	TSB	1	Rice	WildType
L1P01A11	TACTGAGCTAATCACG	AACMGGATTAGATACCCKG	ACGTCATCCCCACCTTCC	TACTGAGCTA	ATCACG	L1	P01	A11	Nippobare	Root	TSB	1	Rice	WildType
L1P01A12	CATAGTAGTGATCACG	AACMGGATTAGATACCCKG	ACGTCATCCCCACCTTCC	CATAGTAGTG	ATCACG	L1	P01	A12	Nippobare	Root	TSB	1	Rice	WildType
L1P01B1	CGAGAGATACATCACG	AACMGGATTAGATACCCKG	ACGTCATCCCCACCTTCC	CGAGAGATAC	ATCACG	L1	P01	B1	Nippobare	Root	TSB	1	Rice	WildType
L1P01B2	ATACGACGTAATCACG	AACMGGATTAGATACCCKG	ACGTCATCCCCACCTTCC	ATACGACGTA	ATCACG	L1	P01	B2	Nippobare	Root	TSB	1	Rice	WildType
L1P01B3	TCACGTACTAATCACG	AACMGGATTAGATACCCKG	ACGTCATCCCCACCTTCC	TCACGTACTA	ATCACG	L1	P01	B3	Nippobare	Root	TSB	1	Rice	WildType
L1P01B4	CGTCTAGTACATCACG	AACMGGATTAGATACCCKG	ACGTCATCCCCACCTTCC	CGTCTAGTAC	ATCACG	L1	P01	B4	Nippobare	Root	TSB	1	Rice	WildType
L1P01B5	TCTACGTAGCATCACG	AACMGGATTAGATACCCKG	ACGTCATCCCCACCTTCC	TCTACGTAGC	ATCACG	L1	P01	B5	Nippobare	Root	TSB	1	Rice	WildType
L1P01B6	CACGCGAGTCATCACG	AACMGGATTAGATACCCKG	ACGTCATCCCCACCTTCC	CACGCGAGTC	ATCACG	L1	P01	B6	Nippobare	Root	TSB	1	Rice	WildType
L1P01B7	ACGACTACAGATCACG	AACMGGATTAGATACCCKG	ACGTCATCCCCACCTTCC	ACGACTACAG	ATCACG	L1	P01	B7	Nippobare	Root	TSB	1	Rice	WildType
L1P01B8	CGTAGACTAGATCACG	AACMGGATTAGATACCCKG	ACGTCATCCCCACCTTCC	CGTAGACTAG	ATCACG	L1	P01	B8	Nippobare	Root	TSB	1	Rice	WildType
L1P01B9	TACGAGTATGATCACG	AACMGGATTAGATACCCKG	ACGTCATCCCCACCTTCC	TACGAGTATG	ATCACG	L1	P01	B9	Nippobare	Root	TSB	1	Rice	WildType
L1P01B10	TACTCTCGTGATCACG	AACMGGATTAGATACCCKG	ACGTCATCCCCACCTTCC	TACTCTCGTG	ATCACG	L1	P01	B10	Nippobare	Root	TSB	1	Rice	WildType
L1P01B11	TAGAGACGAGATCACG	AACMGGATTAGATACCCKG	ACGTCATCCCCACCTTCC	TAGAGACGAG	ATCACG	L1	P01	B11	Nippobare	Root	TSB	1	Rice	WildType
L1P01B12	TCGTCGCTCGATCACG	AACMGGATTAGATACCCKG	ACGTCATCCCCACCTTCC	TCGTCGCTCG	ATCACG	L1	P01	B12	Nippobare	Root	TSB	1	Rice	WildType
L1P01C1	ACATACGCGTATCACG	AACMGGATTAGATACCCKG	ACGTCATCCCCACCTTCC	ACATACGCGT	ATCACG	L1	P01	C1	Nippobare	Root	TSB	1	Rice	WildType
L1P01C2	ACGCGAGTATATCACG	AACMGGATTAGATACCCKG	ACGTCATCCCCACCTTCC	ACGCGAGTAT	ATCACG	L1	P01	C2	Nippobare	Root	TSB	1	Rice	WildType
L1P01C3	ACTACTATGTATCACG	AACMGGATTAGATACCCKG	ACGTCATCCCCACCTTCC	ACTACTATGT	ATCACG	L1	P01	C3	Nippobare	Root	TSB	1	Rice	WildType
L1P01C4	ACTGTACAGTATCACG	AACMGGATTAGATACCCKG	ACGTCATCCCCACCTTCC	ACTGTACAGT	ATCACG	L1	P01	C4	Nippobare	Root	TSB	1	Rice	WildType
L1P01C5	AGACTATACTATCACG	AACMGGATTAGATACCCKG	ACGTCATCCCCACCTTCC	AGACTATACT	ATCACG	L1	P01	C5	Nippobare	Root	TSB	1	Rice	WildType
L1P01C6	AGCGTCGTCTATCACG	AACMGGATTAGATACCCKG	ACGTCATCCCCACCTTCC	AGCGTCGTCT	ATCACG	L1	P01	C6	Nippobare	Root	TSB	1	Rice	WildType
L1P01C7	AGTACGCTATATCACG	AACMGGATTAGATACCCKG	ACGTCATCCCCACCTTCC	AGTACGCTAT	ATCACG	L1	P01	C7	Nippobare	Root	TSB	1	Rice	WildType
L1P01C8	CACGCTACGAATCACG	AACMGGATTAGATACCCKG	ACGTCATCCCCACCTTCC	CACGCTACGA	ATCACG	L1	P01	C8	Nippobare	Root	TSB	1	Rice	WildType
L1P01C9	CACGCTACGTATCACG	AACMGGATTAGATACCCKG	ACGTCATCCCCACCTTCC	CACGCTACGT	ATCACG	L1	P01	C9	Nippobare	Root	TSB	1	Rice	WildType
L1P01C10	CAGTAGACGTATCACG	AACMGGATTAGATACCCKG	ACGTCATCCCCACCTTCC	CAGTAGACGT	ATCACG	L1	P01	C10	Nippobare	Root	TSB	1	Rice	WildType
L1P01C11	CGACGTGACTATCACG	AACMGGATTAGATACCCKG	ACGTCATCCCCACCTTCC	CGACGTGACT	ATCACG	L1	P01	C11	Nippobare	Root	TSB	1	Rice	WildType
L1P01C12	CAGTCTCTAGATCACG	AACMGGATTAGATACCCKG	ACGTCATCCCCACCTTCC	CAGTCTCTAG	ATCACG	L1	P01	C12	Nippobare	Root	TSB	1	Rice	WildType
L1P01D1	TACACGTGATATCACG	AACMGGATTAGATACCCKG	ACGTCATCCCCACCTTCC	TACACGTGAT	ATCACG	L1	P01	D1	Nippobare	Root	TSB	1	Rice	WildType
L1P01D2	TACAGATCGTATCACG	AACMGGATTAGATACCCKG	ACGTCATCCCCACCTTCC	TACAGATCGT	ATCACG	L1	P01	D2	Nippobare	Root	TSB	1	Rice	WildType
L1P01D3	TACGCTGTCTATCACG	AACMGGATTAGATACCCKG	ACGTCATCCCCACCTTCC	TACGCTGTCT	ATCACG	L1	P01	D3	Nippobare	Root	TSB	1	Rice	WildType
L1P01D4	TAGTGTAGATATCACG	AACMGGATTAGATACCCKG	ACGTCATCCCCACCTTCC	TAGTGTAGAT	ATCACG	L1	P01	D4	Nippobare	Root	TSB	1	Rice	WildType
L1P01D5	TCGATCACGTATCACG	AACMGGATTAGATACCCKG	ACGTCATCCCCACCTTCC	TCGATCACGT	ATCACG	L1	P01	D5	Nippobare	Root	TSB	1	Rice	WildType
L1P01D6	TCGCACTAGTATCACG	AACMGGATTAGATACCCKG	ACGTCATCCCCACCTTCC	TCGCACTAGT	ATCACG	L1	P01	D6	Nippobare	Root	TSB	1	Rice	WildType
L1P01D7	TCTAGCGACTATCACG	AACMGGATTAGATACCCKG	ACGTCATCCCCACCTTCC	TCTAGCGACT	ATCACG	L1	P01	D7	Nippobare	Root	TSB	1	Rice	WildType
L1P01D8	CACGTGTATAATCACG	AACMGGATTAGATACCCKG	ACGTCATCCCCACCTTCC	CACGTGTATA	ATCACG	L1	P01	D8	Nippobare	Root	TSB	1	Rice	WildType
L1P01D9	TGACGTATGTATCACG	AACMGGATTAGATACCCKG	ACGTCATCCCCACCTTCC	TGACGTATGT	ATCACG	L1	P01	D9	Nippobare	Root	TSB	1	Rice	WildType
L1P01D10	CACTACGATGATCACG	AACMGGATTAGATACCCKG	ACGTCATCCCCACCTTCC	CACTACGATG	ATCACG	L1	P01	D10	Nippobare	Root	TSB	1	Rice	WildType
L1P01D11	ACAGTATATAATCACG	AACMGGATTAGATACCCKG	ACGTCATCCCCACCTTCC	ACAGTATATA	ATCACG	L1	P01	D11	Nippobare	Root	TSB	1	Rice	WildType
L1P01D12	ACGCGATCGAATCACG	AACMGGATTAGATACCCKG	ACGTCATCCCCACCTTCC	ACGCGATCGA	ATCACG	L1	P01	D12	Nippobare	Root	TSB	1	Rice	WildType
L1P01E1	ACTAGCAGTAATCACG	AACMGGATTAGATACCCKG	ACGTCATCCCCACCTTCC	ACTAGCAGTA	ATCACG	L1	P01	E1	Nippobare	Root	TSB	1	Rice	WildType
L1P01E2	AGCTCACGTAATCACG	AACMGGATTAGATACCCKG	ACGTCATCCCCACCTTCC	AGCTCACGTA	ATCACG	L1	P01	E2	Nippobare	Root	TSB	1	Rice	WildType
L1P01E3	AGTATACATAATCACG	AACMGGATTAGATACCCKG	ACGTCATCCCCACCTTCC	AGTATACATA	ATCACG	L1	P01	E3	Nippobare	Root	TSB	1	Rice	WildType
L1P01E4	AGTCGAGAGAATCACG	AACMGGATTAGATACCCKG	ACGTCATCCCCACCTTCC	AGTCGAGAGA	ATCACG	L1	P01	E4	Nippobare	Root	TSB	1	Rice	WildType
L1P01E5	AGTGCTACGAATCACG	AACMGGATTAGATACCCKG	ACGTCATCCCCACCTTCC	AGTGCTACGA	ATCACG	L1	P01	E5	Nippobare	Root	TSB	1	Rice	WildType
L1P01E6	CGATCGTATAATCACG	AACMGGATTAGATACCCKG	ACGTCATCCCCACCTTCC	CGATCGTATA	ATCACG	L1	P01	E6	Nippobare	Root	TSB	1	Rice	WildType
L1P01E7	CGCAGTACGAATCACG	AACMGGATTAGATACCCKG	ACGTCATCCCCACCTTCC	CGCAGTACGA	ATCACG	L1	P01	E7	Nippobare	Root	TSB	1	Rice	WildType
L1P01E8	CGCGTATACAATCACG	AACMGGATTAGATACCCKG	ACGTCATCCCCACCTTCC	CGCGTATACA	ATCACG	L1	P01	E8	Nippobare	Root	TSB	1	Rice	WildType
L1P01E9	CGTACAGTCAATCACG	AACMGGATTAGATACCCKG	ACGTCATCCCCACCTTCC	CGTACAGTCA	ATCACG	L1	P01	E9	Nippobare	Root	TSB	1	Rice	WildType
L1P01E10	CGTACTCAGAATCACG	AACMGGATTAGATACCCKG	ACGTCATCCCCACCTTCC	CGTACTCAGA	ATCACG	L1	P01	E10	Nippobare	Root	TSB	1	Rice	WildType
L1P01E11	CTACGCTCTAATCACG	AACMGGATTAGATACCCKG	ACGTCATCCCCACCTTCC	CTACGCTCTA	ATCACG	L1	P01	E11	Nippobare	Root	TSB	1	Rice	WildType
L1P01E12	CTATAGCGTAATCACG	AACMGGATTAGATACCCKG	ACGTCATCCCCACCTTCC	CTATAGCGTA	ATCACG	L1	P01	E12	Nippobare	Root	TSB	1	Rice	WildType
L1P01F1	TACGTCATCAATCACG	AACMGGATTAGATACCCKG	ACGTCATCCCCACCTTCC	TACGTCATCA	ATCACG	L1	P01	F1	Nippobare	Root	TSB	1	Rice	WildType
L1P01F2	TAGTCGCATAATCACG	AACMGGATTAGATACCCKG	ACGTCATCCCCACCTTCC	TAGTCGCATA	ATCACG	L1	P01	F2	Nippobare	Root	TSB	1	Rice	WildType
L1P01F3	TATATATACAATCACG	AACMGGATTAGATACCCKG	ACGTCATCCCCACCTTCC	TATATATACA	ATCACG	L1	P01	F3	Nippobare	Root	TSB	1	Rice	WildType
L1P01F4	TATGCTAGTAATCACG	AACMGGATTAGATACCCKG	ACGTCATCCCCACCTTCC	TATGCTAGTA	ATCACG	L1	P01	F4	Nippobare	Root	TSB	1	Rice	WildType
L1P01F5	TCACGCGAGAATCACG	AACMGGATTAGATACCCKG	ACGTCATCCCCACCTTCC	TCACGCGAGA	ATCACG	L1	P01	F5	Nippobare	Root	TSB	1	Rice	WildType
L1P01F6	TCGATAGTGAATCACG	AACMGGATTAGATACCCKG	ACGTCATCCCCACCTTCC	TCGATAGTGA	ATCACG	L1	P01	F6	Nippobare	Root	TSB	1	Rice	WildType
L1P01F7	TCGCTGCGTAATCACG	AACMGGATTAGATACCCKG	ACGTCATCCCCACCTTCC	TCGCTGCGTA	ATCACG	L1	P01	F7	Nippobare	Root	TSB	1	Rice	WildType
L1P01F8	TCTGACGTCAATCACG	AACMGGATTAGATACCCKG	ACGTCATCCCCACCTTCC	TCTGACGTCA	ATCACG	L1	P01	F8	Nippobare	Root	TSB	1	Rice	WildType
L1P01F9	TGAGTCAGTAATCACG	AACMGGATTAGATACCCKG	ACGTCATCCCCACCTTCC	TGAGTCAGTA	ATCACG	L1	P01	F9	Nippobare	Root	TSB	1	Rice	WildType
L1P01F10	CACTATACTCATCACG	AACMGGATTAGATACCCKG	ACGTCATCCCCACCTTCC	CACTATACTC	ATCACG	L1	P01	F10	Nippobare	Root	TSB	1	Rice	WildType
L1P01F11	TGTCACACGAATCACG	AACMGGATTAGATACCCKG	ACGTCATCCCCACCTTCC	TGTCACACGA	ATCACG	L1	P01	F11	Nippobare	Root	TSB	1	Rice	WildType
L1P01F12	TGTCGTCGCAATCACG	AACMGGATTAGATACCCKG	ACGTCATCCCCACCTTCC	TGTCGTCGCA	ATCACG	L1	P01	F12	Nippobare	Root	TSB	1	Rice	WildType
L1P01G1	ACACATACGCATCACG	AACMGGATTAGATACCCKG	ACGTCATCCCCACCTTCC	ACACATACGC	ATCACG	L1	P01	G1	Nippobare	Root	TSB	1	Rice	WildType
L1P01G2	ACAGTCGTGCATCACG	AACMGGATTAGATACCCKG	ACGTCATCCCCACCTTCC	ACAGTCGTGC	ATCACG	L1	P01	G2	Nippobare	Root	TSB	1	Rice	WildType
L1P01G3	ACATGACGACATCACG	AACMGGATTAGATACCCKG	ACGTCATCCCCACCTTCC	ACATGACGAC	ATCACG	L1	P01	G3	Nippobare	Root	TSB	1	Rice	WildType
L1P01G4	ACGACAGCTCATCACG	AACMGGATTAGATACCCKG	ACGTCATCCCCACCTTCC	ACGACAGCTC	ATCACG	L1	P01	G4	Nippobare	Root	TSB	1	Rice	WildType
L1P01G5	ACGTCTCATCATCACG	AACMGGATTAGATACCCKG	ACGTCATCCCCACCTTCC	ACGTCTCATC	ATCACG	L1	P01	G5	Nippobare	Root	TSB	1	Rice	WildType
L1P01G6	ACTCATCTACATCACG	AACMGGATTAGATACCCKG	ACGTCATCCCCACCTTCC	ACTCATCTAC	ATCACG	L1	P01	G6	Nippobare	Root	TSB	1	Rice	WildType
L1P01G7	ACTCGCGCACATCACG	AACMGGATTAGATACCCKG	ACGTCATCCCCACCTTCC	ACTCGCGCAC	ATCACG	L1	P01	G7	Nippobare	Root	TSB	1	Rice	WildType
L1P01G8	AGAGCGTCACATCACG	AACMGGATTAGATACCCKG	ACGTCATCCCCACCTTCC	AGAGCGTCAC	ATCACG	L1	P01	G8	Nippobare	Root	TSB	1	Rice	WildType
L1P01G9	AGCGACTAGCATCACG	AACMGGATTAGATACCCKG	ACGTCATCCCCACCTTCC	AGCGACTAGC	ATCACG	L1	P01	G9	Nippobare	Root	TSB	1	Rice	WildType
L1P01G10	CAGCGTACTGATCACG	AACMGGATTAGATACCCKG	ACGTCATCCCCACCTTCC	CAGCGTACTG	ATCACG	L1	P01	G10	Nippobare	Root	TSB	1	Rice	WildType
L1P01G11	AGTGACACACATCACG	AACMGGATTAGATACCCKG	ACGTCATCCCCACCTTCC	AGTGACACAC	ATCACG	L1	P01	G11	Nippobare	Root	TSB	1	Rice	WildType
L1P01G12	AGTGTATGTCATCACG	AACMGGATTAGATACCCKG	ACGTCATCCCCACCTTCC	AGTGTATGTC	ATCACG	L1	P01	G12	Nippobare	Root	TSB	1	Rice	WildType
L1P01H1	ATAGATAGACATCACG	AACMGGATTAGATACCCKG	ACGTCATCCCCACCTTCC	ATAGATAGAC	ATCACG	L1	P01	H1	Nippobare	Root	TSB	1	Rice	WildType
L1P01H2	ATATAGTCGCATCACG	AACMGGATTAGATACCCKG	ACGTCATCCCCACCTTCC	ATATAGTCGC	ATCACG	L1	P01	H2	Nippobare	Root	TSB	1	Rice	WildType
L1P01H3	ATCTACTGACATCACG	AACMGGATTAGATACCCKG	ACGTCATCCCCACCTTCC	ATCTACTGAC	ATCACG	L1	P01	H3	Nippobare	Root	TSB	1	Rice	WildType
L1P01H4	CACGTAGATCATCACG	AACMGGATTAGATACCCKG	ACGTCATCCCCACCTTCC	CACGTAGATC	ATCACG	L1	P01	H4	Nippobare	Root	TSB	1	Rice	WildType
L1P01H5	CACGTCTCGCATCACG	AACMGGATTAGATACCCKG	ACGTCATCCCCACCTTCC	CACGTCTCGC	ATCACG	L1	P01	H5	Nippobare	Root	TSB	1	Rice	WildType
L1P01H6	CATACTCTACATCACG	AACMGGATTAGATACCCKG	ACGTCATCCCCACCTTCC	CATACTCTAC	ATCACG	L1	P01	H6	Nippobare	Root	TSB	1	Rice	WildType
L1P01H7	CGACACTATCATCACG	AACMGGATTAGATACCCKG	ACGTCATCCCCACCTTCC	CGACACTATC	ATCACG	L1	P01	H7	Nippobare	Root	TSB	1	Rice	WildType
L1P01H8	CGAGACGCGCATCACG	AACMGGATTAGATACCCKG	ACGTCATCCCCACCTTCC	CGAGACGCGC	ATCACG	L1	P01	H8	Nippobare	Root	TSB	1	Rice	WildType
L1P01H9	CGTATGCGACATCACG	AACMGGATTAGATACCCKG	ACGTCATCCCCACCTTCC	CGTATGCGAC	ATCACG	L1	P01	H9	Nippobare	Root	TSB	1	Rice	WildType
L1P01H10	CGTCGATCTCATCACG	AACMGGATTAGATACCCKG	ACGTCATCCCCACCTTCC	CGTCGATCTC	ATCACG	L1	P01	H10	Nippobare	Root	TSB	1	Rice	WildType
L1P01H11	CTACGACTGCATCACG	AACMGGATTAGATACCCKG	ACGTCATCCCCACCTTCC	CTACGACTGC	ATCACG	L1	P01	H11	Nippobare	Root	TSB	1	Rice	WildType
L1P01H12	CTAGTCACTCATCACG	AACMGGATTAGATACCCKG	ACGTCATCCCCACCTTCC	CTAGTCACTC	ATCACG	L1	P01	H12	Nippobare	Root	TSB	1	Rice	WildType
L1P02A1	ACGCTCGACAAGAGTC	AACMGGATTAGATACCCKG	ACGTCATCCCCACCTTCC	ACGCTCGACA	AGAGTC	L1	P02	A1	Nippobare	Root	TSB	1	Rice	WildType
L1P02A2	AGACGCACTCAGAGTC	AACMGGATTAGATACCCKG	ACGTCATCCCCACCTTCC	AGACGCACTC	AGAGTC	L1	P02	A2	Nippobare	Root	TSB	1	Rice	WildType
L1P02A3	AGCACTGTAGAGAGTC	AACMGGATTAGATACCCKG	ACGTCATCCCCACCTTCC	AGCACTGTAG	AGAGTC	L1	P02	A3	Nippobare	Root	TSB	1	Rice	WildType
L1P02A4	ATCAGACACGAGAGTC	AACMGGATTAGATACCCKG	ACGTCATCCCCACCTTCC	ATCAGACACG	AGAGTC	L1	P02	A4	Nippobare	Root	TSB	1	Rice	WildType
L1P02A5	ATATCGCGAGAGAGTC	AACMGGATTAGATACCCKG	ACGTCATCCCCACCTTCC	ATATCGCGAG	AGAGTC	L1	P02	A5	Nippobare	Root	TSB	1	Rice	WildType
L1P02A6	CACGAGACAGAGAGTC	AACMGGATTAGATACCCKG	ACGTCATCCCCACCTTCC	CACGAGACAG	AGAGTC	L1	P02	A6	Nippobare	Root	TSB	1	Rice	WildType
L1P02A7	CTCGCGTGTCAGAGTC	AACMGGATTAGATACCCKG	ACGTCATCCCCACCTTCC	CTCGCGTGTC	AGAGTC	L1	P02	A7	Nippobare	Root	TSB	1	Rice	WildType
L1P02A8	TAGTATCAGCAGAGTC	AACMGGATTAGATACCCKG	ACGTCATCCCCACCTTCC	TAGTATCAGC	AGAGTC	L1	P02	A8	Nippobare	Root	TSB	1	Rice	WildType
L1P02A9	TCTCTATGCGAGAGTC	AACMGGATTAGATACCCKG	ACGTCATCCCCACCTTCC	TCTCTATGCG	AGAGTC	L1	P02	A9	Nippobare	Root	TSB	1	Rice	WildType
L1P02A10	TGATACGTCTAGAGTC	AACMGGATTAGATACCCKG	ACGTCATCCCCACCTTCC	TGATACGTCT	AGAGTC	L1	P02	A10	Nippobare	Root	TSB	1	Rice	WildType
L1P02A11	TACTGAGCTAAGAGTC	AACMGGATTAGATACCCKG	ACGTCATCCCCACCTTCC	TACTGAGCTA	AGAGTC	L1	P02	A11	Nippobare	Root	TSB	1	Rice	WildType
L1P02A12	CATAGTAGTGAGAGTC	AACMGGATTAGATACCCKG	ACGTCATCCCCACCTTCC	CATAGTAGTG	AGAGTC	L1	P02	A12	Nippobare	Root	TSB	1	Rice	WildType
L1P02B1	CGAGAGATACAGAGTC	AACMGGATTAGATACCCKG	ACGTCATCCCCACCTTCC	CGAGAGATAC	AGAGTC	L1	P02	B1	Nippobare	Root	TSB	1	Rice	WildType
L1P02B2	ATACGACGTAAGAGTC	AACMGGATTAGATACCCKG	ACGTCATCCCCACCTTCC	ATACGACGTA	AGAGTC	L1	P02	B2	Nippobare	Root	TSB	1	Rice	WildType
L1P02B3	TCACGTACTAAGAGTC	AACMGGATTAGATACCCKG	ACGTCATCCCCACCTTCC	TCACGTACTA	AGAGTC	L1	P02	B3	Nippobare	Root	TSB	1	Rice	WildType
L1P02B4	CGTCTAGTACAGAGTC	AACMGGATTAGATACCCKG	ACGTCATCCCCACCTTCC	CGTCTAGTAC	AGAGTC	L1	P02	B4	Nippobare	Root	TSB	1	Rice	WildType
L1P02B5	TCTACGTAGCAGAGTC	AACMGGATTAGATACCCKG	ACGTCATCCCCACCTTCC	TCTACGTAGC	AGAGTC	L1	P02	B5	Nippobare	Root	TSB	1	Rice	WildType
L1P02B6	CACGCGAGTCAGAGTC	AACMGGATTAGATACCCKG	ACGTCATCCCCACCTTCC	CACGCGAGTC	AGAGTC	L1	P02	B6	Nippobare	Root	TSB	1	Rice	WildType
L1P02B7	ACGACTACAGAGAGTC	AACMGGATTAGATACCCKG	ACGTCATCCCCACCTTCC	ACGACTACAG	AGAGTC	L1	P02	B7	Nippobare	Root	TSB	1	Rice	WildType
L1P02B8	CGTAGACTAGAGAGTC	AACMGGATTAGATACCCKG	ACGTCATCCCCACCTTCC	CGTAGACTAG	AGAGTC	L1	P02	B8	Nippobare	Root	TSB	1	Rice	WildType
L1P02B9	TACGAGTATGAGAGTC	AACMGGATTAGATACCCKG	ACGTCATCCCCACCTTCC	TACGAGTATG	AGAGTC	L1	P02	B9	Nippobare	Root	TSB	1	Rice	WildType
L1P02B10	TACTCTCGTGAGAGTC	AACMGGATTAGATACCCKG	ACGTCATCCCCACCTTCC	TACTCTCGTG	AGAGTC	L1	P02	B10	Nippobare	Root	TSB	1	Rice	WildType
L1P02B11	TAGAGACGAGAGAGTC	AACMGGATTAGATACCCKG	ACGTCATCCCCACCTTCC	TAGAGACGAG	AGAGTC	L1	P02	B11	Nippobare	Root	TSB	1	Rice	WildType
L1P02B12	TCGTCGCTCGAGAGTC	AACMGGATTAGATACCCKG	ACGTCATCCCCACCTTCC	TCGTCGCTCG	AGAGTC	L1	P02	B12	Nippobare	Root	TSB	1	Rice	WildType
L1P02C1	ACATACGCGTAGAGTC	AACMGGATTAGATACCCKG	ACGTCATCCCCACCTTCC	ACATACGCGT	AGAGTC	L1	P02	C1	Nippobare	Root	TSB	1	Rice	WildType
L1P02C2	ACGCGAGTATAGAGTC	AACMGGATTAGATACCCKG	ACGTCATCCCCACCTTCC	ACGCGAGTAT	AGAGTC	L1	P02	C2	Nippobare	Root	TSB	1	Rice	WildType
L1P02C3	ACTACTATGTAGAGTC	AACMGGATTAGATACCCKG	ACGTCATCCCCACCTTCC	ACTACTATGT	AGAGTC	L1	P02	C3	Nippobare	Root	TSB	1	Rice	WildType
L1P02C4	ACTGTACAGTAGAGTC	AACMGGATTAGATACCCKG	ACGTCATCCCCACCTTCC	ACTGTACAGT	AGAGTC	L1	P02	C4	Nippobare	Root	TSB	1	Rice	WildType
L1P02C5	AGACTATACTAGAGTC	AACMGGATTAGATACCCKG	ACGTCATCCCCACCTTCC	AGACTATACT	AGAGTC	L1	P02	C5	Nippobare	Root	TSB	1	Rice	WildType
L1P02C6	AGCGTCGTCTAGAGTC	AACMGGATTAGATACCCKG	ACGTCATCCCCACCTTCC	AGCGTCGTCT	AGAGTC	L1	P02	C6	Nippobare	Root	TSB	1	Rice	WildType
L1P02C7	AGTACGCTATAGAGTC	AACMGGATTAGATACCCKG	ACGTCATCCCCACCTTCC	AGTACGCTAT	AGAGTC	L1	P02	C7	Nippobare	Root	TSB	1	Rice	WildType
L1P02C8	CACGCTACGAAGAGTC	AACMGGATTAGATACCCKG	ACGTCATCCCCACCTTCC	CACGCTACGA	AGAGTC	L1	P02	C8	Nippobare	Root	TSB	1	Rice	WildType
L1P02C9	CACGCTACGTAGAGTC	AACMGGATTAGATACCCKG	ACGTCATCCCCACCTTCC	CACGCTACGT	AGAGTC	L1	P02	C9	Nippobare	Root	TSB	1	Rice	WildType
L1P02C10	CAGTAGACGTAGAGTC	AACMGGATTAGATACCCKG	ACGTCATCCCCACCTTCC	CAGTAGACGT	AGAGTC	L1	P02	C10	Nippobare	Root	TSB	1	Rice	WildType
L1P02C11	CGACGTGACTAGAGTC	AACMGGATTAGATACCCKG	ACGTCATCCCCACCTTCC	CGACGTGACT	AGAGTC	L1	P02	C11	Nippobare	Root	TSB	1	Rice	WildType
L1P02C12	CAGTCTCTAGAGAGTC	AACMGGATTAGATACCCKG	ACGTCATCCCCACCTTCC	CAGTCTCTAG	AGAGTC	L1	P02	C12	Nippobare	Root	TSB	1	Rice	WildType
L1P02D1	TACACGTGATAGAGTC	AACMGGATTAGATACCCKG	ACGTCATCCCCACCTTCC	TACACGTGAT	AGAGTC	L1	P02	D1	Nippobare	Root	TSB	1	Rice	WildType
L1P02D2	TACAGATCGTAGAGTC	AACMGGATTAGATACCCKG	ACGTCATCCCCACCTTCC	TACAGATCGT	AGAGTC	L1	P02	D2	Nippobare	Root	TSB	1	Rice	WildType
L1P02D3	TACGCTGTCTAGAGTC	AACMGGATTAGATACCCKG	ACGTCATCCCCACCTTCC	TACGCTGTCT	AGAGTC	L1	P02	D3	Nippobare	Root	TSB	1	Rice	WildType
L1P02D4	TAGTGTAGATAGAGTC	AACMGGATTAGATACCCKG	ACGTCATCCCCACCTTCC	TAGTGTAGAT	AGAGTC	L1	P02	D4	Nippobare	Root	TSB	1	Rice	WildType
L1P02D5	TCGATCACGTAGAGTC	AACMGGATTAGATACCCKG	ACGTCATCCCCACCTTCC	TCGATCACGT	AGAGTC	L1	P02	D5	Nippobare	Root	TSB	1	Rice	WildType
L1P02D6	TCGCACTAGTAGAGTC	AACMGGATTAGATACCCKG	ACGTCATCCCCACCTTCC	TCGCACTAGT	AGAGTC	L1	P02	D6	Nippobare	Root	TSB	1	Rice	WildType
L1P02D7	TCTAGCGACTAGAGTC	AACMGGATTAGATACCCKG	ACGTCATCCCCACCTTCC	TCTAGCGACT	AGAGTC	L1	P02	D7	Nippobare	Root	TSB	1	Rice	WildType
L1P02D8	CACGTGTATAAGAGTC	AACMGGATTAGATACCCKG	ACGTCATCCCCACCTTCC	CACGTGTATA	AGAGTC	L1	P02	D8	Nippobare	Root	TSB	1	Rice	WildType
L1P02D9	TGACGTATGTAGAGTC	AACMGGATTAGATACCCKG	ACGTCATCCCCACCTTCC	TGACGTATGT	AGAGTC	L1	P02	D9	Nippobare	Root	TSB	1	Rice	WildType
L1P02D10	CACTACGATGAGAGTC	AACMGGATTAGATACCCKG	ACGTCATCCCCACCTTCC	CACTACGATG	AGAGTC	L1	P02	D10	Nippobare	Root	TSB	1	Rice	WildType
L1P02D11	ACAGTATATAAGAGTC	AACMGGATTAGATACCCKG	ACGTCATCCCCACCTTCC	ACAGTATATA	AGAGTC	L1	P02	D11	Nippobare	Root	TSB	1	Rice	WildType
L1P02D12	ACGCGATCGAAGAGTC	AACMGGATTAGATACCCKG	ACGTCATCCCCACCTTCC	ACGCGATCGA	AGAGTC	L1	P02	D12	Nippobare	Root	TSB	1	Rice	WildType
L1P02E1	ACTAGCAGTAAGAGTC	AACMGGATTAGATACCCKG	ACGTCATCCCCACCTTCC	ACTAGCAGTA	AGAGTC	L1	P02	E1	Nippobare	Root	TSB	1	Rice	WildType
L1P02E2	AGCTCACGTAAGAGTC	AACMGGATTAGATACCCKG	ACGTCATCCCCACCTTCC	AGCTCACGTA	AGAGTC	L1	P02	E2	Nippobare	Root	TSB	1	Rice	WildType
L1P02E3	AGTATACATAAGAGTC	AACMGGATTAGATACCCKG	ACGTCATCCCCACCTTCC	AGTATACATA	AGAGTC	L1	P02	E3	Nippobare	Root	TSB	1	Rice	WildType
L1P02E4	AGTCGAGAGAAGAGTC	AACMGGATTAGATACCCKG	ACGTCATCCCCACCTTCC	AGTCGAGAGA	AGAGTC	L1	P02	E4	Nippobare	Root	TSB	1	Rice	WildType
L1P02E5	AGTGCTACGAAGAGTC	AACMGGATTAGATACCCKG	ACGTCATCCCCACCTTCC	AGTGCTACGA	AGAGTC	L1	P02	E5	Nippobare	Root	TSB	1	Rice	WildType
L1P02E6	CGATCGTATAAGAGTC	AACMGGATTAGATACCCKG	ACGTCATCCCCACCTTCC	CGATCGTATA	AGAGTC	L1	P02	E6	Nippobare	Root	TSB	1	Rice	WildType
L1P02E7	CGCAGTACGAAGAGTC	AACMGGATTAGATACCCKG	ACGTCATCCCCACCTTCC	CGCAGTACGA	AGAGTC	L1	P02	E7	Nippobare	Root	TSB	1	Rice	WildType
L1P02E8	CGCGTATACAAGAGTC	AACMGGATTAGATACCCKG	ACGTCATCCCCACCTTCC	CGCGTATACA	AGAGTC	L1	P02	E8	Nippobare	Root	TSB	1	Rice	WildType
L1P02E9	CGTACAGTCAAGAGTC	AACMGGATTAGATACCCKG	ACGTCATCCCCACCTTCC	CGTACAGTCA	AGAGTC	L1	P02	E9	Nippobare	Root	TSB	1	Rice	WildType
L1P02E10	CGTACTCAGAAGAGTC	AACMGGATTAGATACCCKG	ACGTCATCCCCACCTTCC	CGTACTCAGA	AGAGTC	L1	P02	E10	Nippobare	Root	TSB	1	Rice	WildType
L1P02E11	CTACGCTCTAAGAGTC	AACMGGATTAGATACCCKG	ACGTCATCCCCACCTTCC	CTACGCTCTA	AGAGTC	L1	P02	E11	Nippobare	Root	TSB	1	Rice	WildType
L1P02E12	CTATAGCGTAAGAGTC	AACMGGATTAGATACCCKG	ACGTCATCCCCACCTTCC	CTATAGCGTA	AGAGTC	L1	P02	E12	Nippobare	Root	TSB	1	Rice	WildType
L1P02F1	TACGTCATCAAGAGTC	AACMGGATTAGATACCCKG	ACGTCATCCCCACCTTCC	TACGTCATCA	AGAGTC	L1	P02	F1	Nippobare	Root	TSB	1	Rice	WildType
L1P02F2	TAGTCGCATAAGAGTC	AACMGGATTAGATACCCKG	ACGTCATCCCCACCTTCC	TAGTCGCATA	AGAGTC	L1	P02	F2	Nippobare	Root	TSB	1	Rice	WildType
L1P02F3	TATATATACAAGAGTC	AACMGGATTAGATACCCKG	ACGTCATCCCCACCTTCC	TATATATACA	AGAGTC	L1	P02	F3	Nippobare	Root	TSB	1	Rice	WildType
L1P02F4	TATGCTAGTAAGAGTC	AACMGGATTAGATACCCKG	ACGTCATCCCCACCTTCC	TATGCTAGTA	AGAGTC	L1	P02	F4	Nippobare	Root	TSB	1	Rice	WildType
L1P02F5	TCACGCGAGAAGAGTC	AACMGGATTAGATACCCKG	ACGTCATCCCCACCTTCC	TCACGCGAGA	AGAGTC	L1	P02	F5	Nippobare	Root	TSB	1	Rice	WildType
L1P02F6	TCGATAGTGAAGAGTC	AACMGGATTAGATACCCKG	ACGTCATCCCCACCTTCC	TCGATAGTGA	AGAGTC	L1	P02	F6	Nippobare	Root	TSB	1	Rice	WildType
L1P02F7	TCGCTGCGTAAGAGTC	AACMGGATTAGATACCCKG	ACGTCATCCCCACCTTCC	TCGCTGCGTA	AGAGTC	L1	P02	F7	Nippobare	Root	TSB	1	Rice	WildType
L1P02F8	TCTGACGTCAAGAGTC	AACMGGATTAGATACCCKG	ACGTCATCCCCACCTTCC	TCTGACGTCA	AGAGTC	L1	P02	F8	Nippobare	Root	TSB	1	Rice	WildType
L1P02F9	TGAGTCAGTAAGAGTC	AACMGGATTAGATACCCKG	ACGTCATCCCCACCTTCC	TGAGTCAGTA	AGAGTC	L1	P02	F9	Nippobare	Root	TSB	1	Rice	WildType
L1P02F10	CACTATACTCAGAGTC	AACMGGATTAGATACCCKG	ACGTCATCCCCACCTTCC	CACTATACTC	AGAGTC	L1	P02	F10	Nippobare	Root	TSB	1	Rice	WildType
L1P02F11	TGTCACACGAAGAGTC	AACMGGATTAGATACCCKG	ACGTCATCCCCACCTTCC	TGTCACACGA	AGAGTC	L1	P02	F11	Nippobare	Root	TSB	1	Rice	WildType
L1P02F12	TGTCGTCGCAAGAGTC	AACMGGATTAGATACCCKG	ACGTCATCCCCACCTTCC	TGTCGTCGCA	AGAGTC	L1	P02	F12	Nippobare	Root	TSB	1	Rice	WildType
L1P02G1	ACACATACGCAGAGTC	AACMGGATTAGATACCCKG	ACGTCATCCCCACCTTCC	ACACATACGC	AGAGTC	L1	P02	G1	Nippobare	Root	TSB	1	Rice	WildType
L1P02G2	ACAGTCGTGCAGAGTC	AACMGGATTAGATACCCKG	ACGTCATCCCCACCTTCC	ACAGTCGTGC	AGAGTC	L1	P02	G2	Nippobare	Root	TSB	1	Rice	WildType
L1P02G3	ACATGACGACAGAGTC	AACMGGATTAGATACCCKG	ACGTCATCCCCACCTTCC	ACATGACGAC	AGAGTC	L1	P02	G3	Nippobare	Root	TSB	1	Rice	WildType
L1P02G4	ACGACAGCTCAGAGTC	AACMGGATTAGATACCCKG	ACGTCATCCCCACCTTCC	ACGACAGCTC	AGAGTC	L1	P02	G4	Nippobare	Root	TSB	1	Rice	WildType
L1P02G5	ACGTCTCATCAGAGTC	AACMGGATTAGATACCCKG	ACGTCATCCCCACCTTCC	ACGTCTCATC	AGAGTC	L1	P02	G5	Nippobare	Root	TSB	1	Rice	WildType
L1P02G6	ACTCATCTACAGAGTC	AACMGGATTAGATACCCKG	ACGTCATCCCCACCTTCC	ACTCATCTAC	AGAGTC	L1	P02	G6	Nippobare	Root	TSB	1	Rice	WildType
L1P02G7	ACTCGCGCACAGAGTC	AACMGGATTAGATACCCKG	ACGTCATCCCCACCTTCC	ACTCGCGCAC	AGAGTC	L1	P02	G7	Nippobare	Root	TSB	1	Rice	WildType
L1P02G8	AGAGCGTCACAGAGTC	AACMGGATTAGATACCCKG	ACGTCATCCCCACCTTCC	AGAGCGTCAC	AGAGTC	L1	P02	G8	Nippobare	Root	TSB	1	Rice	WildType
L1P02G9	AGCGACTAGCAGAGTC	AACMGGATTAGATACCCKG	ACGTCATCCCCACCTTCC	AGCGACTAGC	AGAGTC	L1	P02	G9	Nippobare	Root	TSB	1	Rice	WildType
L1P02G10	CAGCGTACTGAGAGTC	AACMGGATTAGATACCCKG	ACGTCATCCCCACCTTCC	CAGCGTACTG	AGAGTC	L1	P02	G10	Nippobare	Root	TSB	1	Rice	WildType
L1P02G11	AGTGACACACAGAGTC	AACMGGATTAGATACCCKG	ACGTCATCCCCACCTTCC	AGTGACACAC	AGAGTC	L1	P02	G11	Nippobare	Root	TSB	1	Rice	WildType
L1P02G12	AGTGTATGTCAGAGTC	AACMGGATTAGATACCCKG	ACGTCATCCCCACCTTCC	AGTGTATGTC	AGAGTC	L1	P02	G12	Nippobare	Root	TSB	1	Rice	WildType
L1P02H1	ATAGATAGACAGAGTC	AACMGGATTAGATACCCKG	ACGTCATCCCCACCTTCC	ATAGATAGAC	AGAGTC	L1	P02	H1	Nippobare	Root	TSB	1	Rice	WildType
L1P02H2	ATATAGTCGCAGAGTC	AACMGGATTAGATACCCKG	ACGTCATCCCCACCTTCC	ATATAGTCGC	AGAGTC	L1	P02	H2	Nippobare	Root	TSB	1	Rice	WildType
L1P02H3	ATCTACTGACAGAGTC	AACMGGATTAGATACCCKG	ACGTCATCCCCACCTTCC	ATCTACTGAC	AGAGTC	L1	P02	H3	Nippobare	Root	TSB	1	Rice	WildType
L1P02H4	CACGTAGATCAGAGTC	AACMGGATTAGATACCCKG	ACGTCATCCCCACCTTCC	CACGTAGATC	AGAGTC	L1	P02	H4	Nippobare	Root	TSB	1	Rice	WildType
L1P02H5	CACGTCTCGCAGAGTC	AACMGGATTAGATACCCKG	ACGTCATCCCCACCTTCC	CACGTCTCGC	AGAGTC	L1	P02	H5	Nippobare	Root	TSB	1	Rice	WildType
L1P02H6	CATACTCTACAGAGTC	AACMGGATTAGATACCCKG	ACGTCATCCCCACCTTCC	CATACTCTAC	AGAGTC	L1	P02	H6	Nippobare	Root	TSB	1	Rice	WildType
L1P02H7	CGACACTATCAGAGTC	AACMGGATTAGATACCCKG	ACGTCATCCCCACCTTCC	CGACACTATC	AGAGTC	L1	P02	H7	Nippobare	Root	TSB	1	Rice	WildType
L1P02H8	CGAGACGCGCAGAGTC	AACMGGATTAGATACCCKG	ACGTCATCCCCACCTTCC	CGAGACGCGC	AGAGTC	L1	P02	H8	Nippobare	Root	TSB	1	Rice	WildType
L1P02H9	CGTATGCGACAGAGTC	AACMGGATTAGATACCCKG	ACGTCATCCCCACCTTCC	CGTATGCGAC	AGAGTC	L1	P02	H9	Nippobare	Root	TSB	1	Rice	WildType
L1P02H10	CGTCGATCTCAGAGTC	AACMGGATTAGATACCCKG	ACGTCATCCCCACCTTCC	CGTCGATCTC	AGAGTC	L1	P02	H10	Nippobare	Root	TSB	1	Rice	WildType
L1P02H11	CTACGACTGCAGAGTC	AACMGGATTAGATACCCKG	ACGTCATCCCCACCTTCC	CTACGACTGC	AGAGTC	L1	P02	H11	Nippobare	Root	TSB	1	Rice	WildType
L1P02H12	CTAGTCACTCAGAGTC	AACMGGATTAGATACCCKG	ACGTCATCCCCACCTTCC	CTAGTCACTC	AGAGTC	L1	P02	H12	Nippobare	Root	TSB	1	Rice	WildType
L1P03A1	ACGCTCGACATTAGGC	AACMGGATTAGATACCCKG	ACGTCATCCCCACCTTCC	ACGCTCGACA	TTAGGC	L1	P03	A1	Nippobare	Root	TSB	1	Rice	WildType
L1P03A2	AGACGCACTCTTAGGC	AACMGGATTAGATACCCKG	ACGTCATCCCCACCTTCC	AGACGCACTC	TTAGGC	L1	P03	A2	Nippobare	Root	TSB	1	Rice	WildType
L1P03A3	AGCACTGTAGTTAGGC	AACMGGATTAGATACCCKG	ACGTCATCCCCACCTTCC	AGCACTGTAG	TTAGGC	L1	P03	A3	Nippobare	Root	TSB	1	Rice	WildType
L1P03A4	ATCAGACACGTTAGGC	AACMGGATTAGATACCCKG	ACGTCATCCCCACCTTCC	ATCAGACACG	TTAGGC	L1	P03	A4	Nippobare	Root	TSB	1	Rice	WildType
L1P03A5	ATATCGCGAGTTAGGC	AACMGGATTAGATACCCKG	ACGTCATCCCCACCTTCC	ATATCGCGAG	TTAGGC	L1	P03	A5	Nippobare	Root	TSB	1	Rice	WildType
L1P03A6	CACGAGACAGTTAGGC	AACMGGATTAGATACCCKG	ACGTCATCCCCACCTTCC	CACGAGACAG	TTAGGC	L1	P03	A6	Nippobare	Root	TSB	1	Rice	WildType
L1P03A7	CTCGCGTGTCTTAGGC	AACMGGATTAGATACCCKG	ACGTCATCCCCACCTTCC	CTCGCGTGTC	TTAGGC	L1	P03	A7	Nippobare	Root	TSB	1	Rice	WildType
L1P03A8	TAGTATCAGCTTAGGC	AACMGGATTAGATACCCKG	ACGTCATCCCCACCTTCC	TAGTATCAGC	TTAGGC	L1	P03	A8	Nippobare	Root	TSB	1	Rice	WildType
L1P03A9	TCTCTATGCGTTAGGC	AACMGGATTAGATACCCKG	ACGTCATCCCCACCTTCC	TCTCTATGCG	TTAGGC	L1	P03	A9	Nippobare	Root	TSB	1	Rice	WildType
L1P03A10	TGATACGTCTTTAGGC	AACMGGATTAGATACCCKG	ACGTCATCCCCACCTTCC	TGATACGTCT	TTAGGC	L1	P03	A10	Nippobare	Root	TSB	1	Rice	WildType
L1P03A11	TACTGAGCTATTAGGC	AACMGGATTAGATACCCKG	ACGTCATCCCCACCTTCC	TACTGAGCTA	TTAGGC	L1	P03	A11	Nippobare	Root	TSB	1	Rice	WildType
L1P03A12	CATAGTAGTGTTAGGC	AACMGGATTAGATACCCKG	ACGTCATCCCCACCTTCC	CATAGTAGTG	TTAGGC	L1	P03	A12	Nippobare	Root	TSB	1	Rice	WildType
L1P03B1	CGAGAGATACTTAGGC	AACMGGATTAGATACCCKG	ACGTCATCCCCACCTTCC	CGAGAGATAC	TTAGGC	L1	P03	B1	Nippobare	Root	TSB	1	Rice	WildType
L1P03B2	ATACGACGTATTAGGC	AACMGGATTAGATACCCKG	ACGTCATCCCCACCTTCC	ATACGACGTA	TTAGGC	L1	P03	B2	Nippobare	Root	TSB	1	Rice	WildType
L1P03B3	TCACGTACTATTAGGC	AACMGGATTAGATACCCKG	ACGTCATCCCCACCTTCC	TCACGTACTA	TTAGGC	L1	P03	B3	Nippobare	Root	TSB	1	Rice	WildType
L1P03B4	CGTCTAGTACTTAGGC	AACMGGATTAGATACCCKG	ACGTCATCCCCACCTTCC	CGTCTAGTAC	TTAGGC	L1	P03	B4	Nippobare	Root	TSB	1	Rice	WildType
L1P03B5	TCTACGTAGCTTAGGC	AACMGGATTAGATACCCKG	ACGTCATCCCCACCTTCC	TCTACGTAGC	TTAGGC	L1	P03	B5	Nippobare	Root	TSB	1	Rice	WildType
L1P03B6	CACGCGAGTCTTAGGC	AACMGGATTAGATACCCKG	ACGTCATCCCCACCTTCC	CACGCGAGTC	TTAGGC	L1	P03	B6	Nippobare	Root	TSB	1	Rice	WildType
L1P03B7	ACGACTACAGTTAGGC	AACMGGATTAGATACCCKG	ACGTCATCCCCACCTTCC	ACGACTACAG	TTAGGC	L1	P03	B7	Nippobare	Root	TSB	1	Rice	WildType
L1P03B8	CGTAGACTAGTTAGGC	AACMGGATTAGATACCCKG	ACGTCATCCCCACCTTCC	CGTAGACTAG	TTAGGC	L1	P03	B8	Nippobare	Root	TSB	1	Rice	WildType
L1P03B9	TACGAGTATGTTAGGC	AACMGGATTAGATACCCKG	ACGTCATCCCCACCTTCC	TACGAGTATG	TTAGGC	L1	P03	B9	Nippobare	Root	TSB	1	Rice	WildType
L1P03B10	TACTCTCGTGTTAGGC	AACMGGATTAGATACCCKG	ACGTCATCCCCACCTTCC	TACTCTCGTG	TTAGGC	L1	P03	B10	Nippobare	Root	TSB	1	Rice	WildType
L1P03B11	TAGAGACGAGTTAGGC	AACMGGATTAGATACCCKG	ACGTCATCCCCACCTTCC	TAGAGACGAG	TTAGGC	L1	P03	B11	Nippobare	Root	TSB	1	Rice	WildType
L1P03B12	TCGTCGCTCGTTAGGC	AACMGGATTAGATACCCKG	ACGTCATCCCCACCTTCC	TCGTCGCTCG	TTAGGC	L1	P03	B12	Nippobare	Root	TSB	1	Rice	WildType
L1P03C1	ACATACGCGTTTAGGC	AACMGGATTAGATACCCKG	ACGTCATCCCCACCTTCC	ACATACGCGT	TTAGGC	L1	P03	C1	Nippobare	Root	TSB	1	Rice	WildType
L1P03C2	ACGCGAGTATTTAGGC	AACMGGATTAGATACCCKG	ACGTCATCCCCACCTTCC	ACGCGAGTAT	TTAGGC	L1	P03	C2	Nippobare	Root	TSB	1	Rice	WildType
L1P03C3	ACTACTATGTTTAGGC	AACMGGATTAGATACCCKG	ACGTCATCCCCACCTTCC	ACTACTATGT	TTAGGC	L1	P03	C3	Nippobare	Root	TSB	1	Rice	WildType
L1P03C4	ACTGTACAGTTTAGGC	AACMGGATTAGATACCCKG	ACGTCATCCCCACCTTCC	ACTGTACAGT	TTAGGC	L1	P03	C4	Nippobare	Root	TSB	1	Rice	WildType
L1P03C5	AGACTATACTTTAGGC	AACMGGATTAGATACCCKG	ACGTCATCCCCACCTTCC	AGACTATACT	TTAGGC	L1	P03	C5	Nippobare	Root	TSB	1	Rice	WildType
L1P03C6	AGCGTCGTCTTTAGGC	AACMGGATTAGATACCCKG	ACGTCATCCCCACCTTCC	AGCGTCGTCT	TTAGGC	L1	P03	C6	Nippobare	Root	TSB	1	Rice	WildType
L1P03C7	AGTACGCTATTTAGGC	AACMGGATTAGATACCCKG	ACGTCATCCCCACCTTCC	AGTACGCTAT	TTAGGC	L1	P03	C7	Nippobare	Root	TSB	1	Rice	WildType
L1P03C8	CACGCTACGATTAGGC	AACMGGATTAGATACCCKG	ACGTCATCCCCACCTTCC	CACGCTACGA	TTAGGC	L1	P03	C8	Nippobare	Root	TSB	1	Rice	WildType
L1P03C9	CACGCTACGTTTAGGC	AACMGGATTAGATACCCKG	ACGTCATCCCCACCTTCC	CACGCTACGT	TTAGGC	L1	P03	C9	Nippobare	Root	TSB	1	Rice	WildType
L1P03C10	CAGTAGACGTTTAGGC	AACMGGATTAGATACCCKG	ACGTCATCCCCACCTTCC	CAGTAGACGT	TTAGGC	L1	P03	C10	Nippobare	Root	TSB	1	Rice	WildType
L1P03C11	CGACGTGACTTTAGGC	AACMGGATTAGATACCCKG	ACGTCATCCCCACCTTCC	CGACGTGACT	TTAGGC	L1	P03	C11	Nippobare	Root	TSB	1	Rice	WildType
L1P03C12	CAGTCTCTAGTTAGGC	AACMGGATTAGATACCCKG	ACGTCATCCCCACCTTCC	CAGTCTCTAG	TTAGGC	L1	P03	C12	Nippobare	Root	TSB	1	Rice	WildType
L1P03D1	TACACGTGATTTAGGC	AACMGGATTAGATACCCKG	ACGTCATCCCCACCTTCC	TACACGTGAT	TTAGGC	L1	P03	D1	Nippobare	Root	TSB	1	Rice	WildType
L1P03D2	TACAGATCGTTTAGGC	AACMGGATTAGATACCCKG	ACGTCATCCCCACCTTCC	TACAGATCGT	TTAGGC	L1	P03	D2	Nippobare	Root	TSB	1	Rice	WildType
L1P03D3	TACGCTGTCTTTAGGC	AACMGGATTAGATACCCKG	ACGTCATCCCCACCTTCC	TACGCTGTCT	TTAGGC	L1	P03	D3	Nippobare	Root	TSB	1	Rice	WildType
L1P03D4	TAGTGTAGATTTAGGC	AACMGGATTAGATACCCKG	ACGTCATCCCCACCTTCC	TAGTGTAGAT	TTAGGC	L1	P03	D4	Nippobare	Root	TSB	1	Rice	WildType
L1P03D5	TCGATCACGTTTAGGC	AACMGGATTAGATACCCKG	ACGTCATCCCCACCTTCC	TCGATCACGT	TTAGGC	L1	P03	D5	Nippobare	Root	TSB	1	Rice	WildType
L1P03D6	TCGCACTAGTTTAGGC	AACMGGATTAGATACCCKG	ACGTCATCCCCACCTTCC	TCGCACTAGT	TTAGGC	L1	P03	D6	Nippobare	Root	TSB	1	Rice	WildType
L1P03D7	TCTAGCGACTTTAGGC	AACMGGATTAGATACCCKG	ACGTCATCCCCACCTTCC	TCTAGCGACT	TTAGGC	L1	P03	D7	Nippobare	Root	TSB	1	Rice	WildType
L1P03D8	CACGTGTATATTAGGC	AACMGGATTAGATACCCKG	ACGTCATCCCCACCTTCC	CACGTGTATA	TTAGGC	L1	P03	D8	Nippobare	Root	TSB	1	Rice	WildType
L1P03D9	TGACGTATGTTTAGGC	AACMGGATTAGATACCCKG	ACGTCATCCCCACCTTCC	TGACGTATGT	TTAGGC	L1	P03	D9	Nippobare	Root	TSB	1	Rice	WildType
L1P03D10	CACTACGATGTTAGGC	AACMGGATTAGATACCCKG	ACGTCATCCCCACCTTCC	CACTACGATG	TTAGGC	L1	P03	D10	Nippobare	Root	TSB	1	Rice	WildType
L1P03D11	ACAGTATATATTAGGC	AACMGGATTAGATACCCKG	ACGTCATCCCCACCTTCC	ACAGTATATA	TTAGGC	L1	P03	D11	Nippobare	Root	TSB	1	Rice	WildType
L1P03D12	ACGCGATCGATTAGGC	AACMGGATTAGATACCCKG	ACGTCATCCCCACCTTCC	ACGCGATCGA	TTAGGC	L1	P03	D12	Nippobare	Root	TSB	1	Rice	WildType
L1P03E1	ACTAGCAGTATTAGGC	AACMGGATTAGATACCCKG	ACGTCATCCCCACCTTCC	ACTAGCAGTA	TTAGGC	L1	P03	E1	Nippobare	Root	TSB	1	Rice	WildType
L1P03E2	AGCTCACGTATTAGGC	AACMGGATTAGATACCCKG	ACGTCATCCCCACCTTCC	AGCTCACGTA	TTAGGC	L1	P03	E2	Nippobare	Root	TSB	1	Rice	WildType
L1P03E3	AGTATACATATTAGGC	AACMGGATTAGATACCCKG	ACGTCATCCCCACCTTCC	AGTATACATA	TTAGGC	L1	P03	E3	Nippobare	Root	TSB	1	Rice	WildType
L1P03E4	AGTCGAGAGATTAGGC	AACMGGATTAGATACCCKG	ACGTCATCCCCACCTTCC	AGTCGAGAGA	TTAGGC	L1	P03	E4	Nippobare	Root	TSB	1	Rice	WildType
L1P03E5	AGTGCTACGATTAGGC	AACMGGATTAGATACCCKG	ACGTCATCCCCACCTTCC	AGTGCTACGA	TTAGGC	L1	P03	E5	Nippobare	Root	TSB	1	Rice	WildType
L1P03E6	CGATCGTATATTAGGC	AACMGGATTAGATACCCKG	ACGTCATCCCCACCTTCC	CGATCGTATA	TTAGGC	L1	P03	E6	Nippobare	Root	TSB	1	Rice	WildType
L1P03E7	CGCAGTACGATTAGGC	AACMGGATTAGATACCCKG	ACGTCATCCCCACCTTCC	CGCAGTACGA	TTAGGC	L1	P03	E7	Nippobare	Root	TSB	1	Rice	WildType
L1P03E8	CGCGTATACATTAGGC	AACMGGATTAGATACCCKG	ACGTCATCCCCACCTTCC	CGCGTATACA	TTAGGC	L1	P03	E8	Nippobare	Root	TSB	1	Rice	WildType
L1P03E9	CGTACAGTCATTAGGC	AACMGGATTAGATACCCKG	ACGTCATCCCCACCTTCC	CGTACAGTCA	TTAGGC	L1	P03	E9	Nippobare	Root	TSB	1	Rice	WildType
L1P03E10	CGTACTCAGATTAGGC	AACMGGATTAGATACCCKG	ACGTCATCCCCACCTTCC	CGTACTCAGA	TTAGGC	L1	P03	E10	Nippobare	Root	TSB	1	Rice	WildType
L1P03E11	CTACGCTCTATTAGGC	AACMGGATTAGATACCCKG	ACGTCATCCCCACCTTCC	CTACGCTCTA	TTAGGC	L1	P03	E11	Nippobare	Root	TSB	1	Rice	WildType
L1P03E12	CTATAGCGTATTAGGC	AACMGGATTAGATACCCKG	ACGTCATCCCCACCTTCC	CTATAGCGTA	TTAGGC	L1	P03	E12	Nippobare	Root	TSB	1	Rice	WildType
L1P03F1	TACGTCATCATTAGGC	AACMGGATTAGATACCCKG	ACGTCATCCCCACCTTCC	TACGTCATCA	TTAGGC	L1	P03	F1	Nippobare	Root	TSB	1	Rice	WildType
L1P03F2	TAGTCGCATATTAGGC	AACMGGATTAGATACCCKG	ACGTCATCCCCACCTTCC	TAGTCGCATA	TTAGGC	L1	P03	F2	Nippobare	Root	TSB	1	Rice	WildType
L1P03F3	TATATATACATTAGGC	AACMGGATTAGATACCCKG	ACGTCATCCCCACCTTCC	TATATATACA	TTAGGC	L1	P03	F3	Nippobare	Root	TSB	1	Rice	WildType
L1P03F4	TATGCTAGTATTAGGC	AACMGGATTAGATACCCKG	ACGTCATCCCCACCTTCC	TATGCTAGTA	TTAGGC	L1	P03	F4	Nippobare	Root	TSB	1	Rice	WildType
L1P03F5	TCACGCGAGATTAGGC	AACMGGATTAGATACCCKG	ACGTCATCCCCACCTTCC	TCACGCGAGA	TTAGGC	L1	P03	F5	Nippobare	Root	TSB	1	Rice	WildType
L1P03F6	TCGATAGTGATTAGGC	AACMGGATTAGATACCCKG	ACGTCATCCCCACCTTCC	TCGATAGTGA	TTAGGC	L1	P03	F6	Nippobare	Root	TSB	1	Rice	WildType
L1P03F7	TCGCTGCGTATTAGGC	AACMGGATTAGATACCCKG	ACGTCATCCCCACCTTCC	TCGCTGCGTA	TTAGGC	L1	P03	F7	Nippobare	Root	TSB	1	Rice	WildType
L1P03F8	TCTGACGTCATTAGGC	AACMGGATTAGATACCCKG	ACGTCATCCCCACCTTCC	TCTGACGTCA	TTAGGC	L1	P03	F8	Nippobare	Root	TSB	1	Rice	WildType
L1P03F9	TGAGTCAGTATTAGGC	AACMGGATTAGATACCCKG	ACGTCATCCCCACCTTCC	TGAGTCAGTA	TTAGGC	L1	P03	F9	Nippobare	Root	TSB	1	Rice	WildType
L1P03F10	CACTATACTCTTAGGC	AACMGGATTAGATACCCKG	ACGTCATCCCCACCTTCC	CACTATACTC	TTAGGC	L1	P03	F10	Nippobare	Root	TSB	1	Rice	WildType
L1P03F11	TGTCACACGATTAGGC	AACMGGATTAGATACCCKG	ACGTCATCCCCACCTTCC	TGTCACACGA	TTAGGC	L1	P03	F11	Nippobare	Root	TSB	1	Rice	WildType
L1P03F12	TGTCGTCGCATTAGGC	AACMGGATTAGATACCCKG	ACGTCATCCCCACCTTCC	TGTCGTCGCA	TTAGGC	L1	P03	F12	Nippobare	Root	TSB	1	Rice	WildType
L1P03G1	ACACATACGCTTAGGC	AACMGGATTAGATACCCKG	ACGTCATCCCCACCTTCC	ACACATACGC	TTAGGC	L1	P03	G1	Nippobare	Root	TSB	1	Rice	WildType
L1P03G2	ACAGTCGTGCTTAGGC	AACMGGATTAGATACCCKG	ACGTCATCCCCACCTTCC	ACAGTCGTGC	TTAGGC	L1	P03	G2	Nippobare	Root	TSB	1	Rice	WildType
L1P03G3	ACATGACGACTTAGGC	AACMGGATTAGATACCCKG	ACGTCATCCCCACCTTCC	ACATGACGAC	TTAGGC	L1	P03	G3	Nippobare	Root	TSB	1	Rice	WildType
L1P03G4	ACGACAGCTCTTAGGC	AACMGGATTAGATACCCKG	ACGTCATCCCCACCTTCC	ACGACAGCTC	TTAGGC	L1	P03	G4	Nippobare	Root	TSB	1	Rice	WildType
L1P03G5	ACGTCTCATCTTAGGC	AACMGGATTAGATACCCKG	ACGTCATCCCCACCTTCC	ACGTCTCATC	TTAGGC	L1	P03	G5	Nippobare	Root	TSB	1	Rice	WildType
L1P03G6	ACTCATCTACTTAGGC	AACMGGATTAGATACCCKG	ACGTCATCCCCACCTTCC	ACTCATCTAC	TTAGGC	L1	P03	G6	Nippobare	Root	TSB	1	Rice	WildType
L1P03G7	ACTCGCGCACTTAGGC	AACMGGATTAGATACCCKG	ACGTCATCCCCACCTTCC	ACTCGCGCAC	TTAGGC	L1	P03	G7	Nippobare	Root	TSB	1	Rice	WildType
L1P03G8	AGAGCGTCACTTAGGC	AACMGGATTAGATACCCKG	ACGTCATCCCCACCTTCC	AGAGCGTCAC	TTAGGC	L1	P03	G8	Nippobare	Root	TSB	1	Rice	WildType
L1P03G9	AGCGACTAGCTTAGGC	AACMGGATTAGATACCCKG	ACGTCATCCCCACCTTCC	AGCGACTAGC	TTAGGC	L1	P03	G9	Nippobare	Root	TSB	1	Rice	WildType
L1P03G10	CAGCGTACTGTTAGGC	AACMGGATTAGATACCCKG	ACGTCATCCCCACCTTCC	CAGCGTACTG	TTAGGC	L1	P03	G10	Nippobare	Root	TSB	1	Rice	WildType
L1P03G11	AGTGACACACTTAGGC	AACMGGATTAGATACCCKG	ACGTCATCCCCACCTTCC	AGTGACACAC	TTAGGC	L1	P03	G11	Nippobare	Root	TSB	1	Rice	WildType
L1P03G12	AGTGTATGTCTTAGGC	AACMGGATTAGATACCCKG	ACGTCATCCCCACCTTCC	AGTGTATGTC	TTAGGC	L1	P03	G12	Nippobare	Root	TSB	1	Rice	WildType
L1P03H1	ATAGATAGACTTAGGC	AACMGGATTAGATACCCKG	ACGTCATCCCCACCTTCC	ATAGATAGAC	TTAGGC	L1	P03	H1	Nippobare	Root	TSB	1	Rice	WildType
L1P03H2	ATATAGTCGCTTAGGC	AACMGGATTAGATACCCKG	ACGTCATCCCCACCTTCC	ATATAGTCGC	TTAGGC	L1	P03	H2	Nippobare	Root	TSB	1	Rice	WildType
L1P03H3	ATCTACTGACTTAGGC	AACMGGATTAGATACCCKG	ACGTCATCCCCACCTTCC	ATCTACTGAC	TTAGGC	L1	P03	H3	Nippobare	Root	TSB	1	Rice	WildType
L1P03H4	CACGTAGATCTTAGGC	AACMGGATTAGATACCCKG	ACGTCATCCCCACCTTCC	CACGTAGATC	TTAGGC	L1	P03	H4	Nippobare	Root	TSB	1	Rice	WildType
L1P03H5	CACGTCTCGCTTAGGC	AACMGGATTAGATACCCKG	ACGTCATCCCCACCTTCC	CACGTCTCGC	TTAGGC	L1	P03	H5	Nippobare	Root	TSB	1	Rice	WildType
L1P03H6	CATACTCTACTTAGGC	AACMGGATTAGATACCCKG	ACGTCATCCCCACCTTCC	CATACTCTAC	TTAGGC	L1	P03	H6	Nippobare	Root	TSB	1	Rice	WildType
L1P03H7	CGACACTATCTTAGGC	AACMGGATTAGATACCCKG	ACGTCATCCCCACCTTCC	CGACACTATC	TTAGGC	L1	P03	H7	Nippobare	Root	TSB	1	Rice	WildType
L1P03H8	CGAGACGCGCTTAGGC	AACMGGATTAGATACCCKG	ACGTCATCCCCACCTTCC	CGAGACGCGC	TTAGGC	L1	P03	H8	Nippobare	Root	TSB	1	Rice	WildType
L1P03H9	CGTATGCGACTTAGGC	AACMGGATTAGATACCCKG	ACGTCATCCCCACCTTCC	CGTATGCGAC	TTAGGC	L1	P03	H9	Nippobare	Root	TSB	1	Rice	WildType
L1P03H10	CGTCGATCTCTTAGGC	AACMGGATTAGATACCCKG	ACGTCATCCCCACCTTCC	CGTCGATCTC	TTAGGC	L1	P03	H10	Nippobare	Root	TSB	1	Rice	WildType
L1P03H11	CTACGACTGCTTAGGC	AACMGGATTAGATACCCKG	ACGTCATCCCCACCTTCC	CTACGACTGC	TTAGGC	L1	P03	H11	Nippobare	Root	TSB	1	Rice	WildType
L1P03H12	CTAGTCACTCTTAGGC	AACMGGATTAGATACCCKG	ACGTCATCCCCACCTTCC	CTAGTCACTC	TTAGGC	L1	P03	H12	Nippobare	Root	TSB	1	Rice	WildType
L1P04A1	ACGCTCGACATGACCA	AACMGGATTAGATACCCKG	ACGTCATCCCCACCTTCC	ACGCTCGACA	TGACCA	L1	P04	A1	Nippobare	Root	TSB	1	Rice	WildType
L1P04A2	AGACGCACTCTGACCA	AACMGGATTAGATACCCKG	ACGTCATCCCCACCTTCC	AGACGCACTC	TGACCA	L1	P04	A2	Nippobare	Root	TSB	1	Rice	WildType
L1P04A3	AGCACTGTAGTGACCA	AACMGGATTAGATACCCKG	ACGTCATCCCCACCTTCC	AGCACTGTAG	TGACCA	L1	P04	A3	Nippobare	Root	TSB	1	Rice	WildType
L1P04A4	ATCAGACACGTGACCA	AACMGGATTAGATACCCKG	ACGTCATCCCCACCTTCC	ATCAGACACG	TGACCA	L1	P04	A4	Nippobare	Root	TSB	1	Rice	WildType
L1P04A5	ATATCGCGAGTGACCA	AACMGGATTAGATACCCKG	ACGTCATCCCCACCTTCC	ATATCGCGAG	TGACCA	L1	P04	A5	Nippobare	Root	TSB	1	Rice	WildType
L1P04A6	CACGAGACAGTGACCA	AACMGGATTAGATACCCKG	ACGTCATCCCCACCTTCC	CACGAGACAG	TGACCA	L1	P04	A6	Nippobare	Root	TSB	1	Rice	WildType
L1P04A7	CTCGCGTGTCTGACCA	AACMGGATTAGATACCCKG	ACGTCATCCCCACCTTCC	CTCGCGTGTC	TGACCA	L1	P04	A7	Nippobare	Root	TSB	1	Rice	WildType
L1P04A8	TAGTATCAGCTGACCA	AACMGGATTAGATACCCKG	ACGTCATCCCCACCTTCC	TAGTATCAGC	TGACCA	L1	P04	A8	Nippobare	Root	TSB	1	Rice	WildType
L1P04A9	TCTCTATGCGTGACCA	AACMGGATTAGATACCCKG	ACGTCATCCCCACCTTCC	TCTCTATGCG	TGACCA	L1	P04	A9	Nippobare	Root	TSB	1	Rice	WildType
L1P04A10	TGATACGTCTTGACCA	AACMGGATTAGATACCCKG	ACGTCATCCCCACCTTCC	TGATACGTCT	TGACCA	L1	P04	A10	Nippobare	Root	TSB	1	Rice	WildType
L1P04A11	TACTGAGCTATGACCA	AACMGGATTAGATACCCKG	ACGTCATCCCCACCTTCC	TACTGAGCTA	TGACCA	L1	P04	A11	Nippobare	Root	TSB	1	Rice	WildType
L1P04A12	CATAGTAGTGTGACCA	AACMGGATTAGATACCCKG	ACGTCATCCCCACCTTCC	CATAGTAGTG	TGACCA	L1	P04	A12	Nippobare	Root	TSB	1	Rice	WildType
L1P04B1	CGAGAGATACTGACCA	AACMGGATTAGATACCCKG	ACGTCATCCCCACCTTCC	CGAGAGATAC	TGACCA	L1	P04	B1	Nippobare	Root	TSB	1	Rice	WildType
L1P04B2	ATACGACGTATGACCA	AACMGGATTAGATACCCKG	ACGTCATCCCCACCTTCC	ATACGACGTA	TGACCA	L1	P04	B2	Nippobare	Root	TSB	1	Rice	WildType
L1P04B3	TCACGTACTATGACCA	AACMGGATTAGATACCCKG	ACGTCATCCCCACCTTCC	TCACGTACTA	TGACCA	L1	P04	B3	Nippobare	Root	TSB	1	Rice	WildType
L1P04B4	CGTCTAGTACTGACCA	AACMGGATTAGATACCCKG	ACGTCATCCCCACCTTCC	CGTCTAGTAC	TGACCA	L1	P04	B4	Nippobare	Root	TSB	1	Rice	WildType
L1P04B5	TCTACGTAGCTGACCA	AACMGGATTAGATACCCKG	ACGTCATCCCCACCTTCC	TCTACGTAGC	TGACCA	L1	P04	B5	Nippobare	Root	TSB	1	Rice	WildType
L1P04B6	CACGCGAGTCTGACCA	AACMGGATTAGATACCCKG	ACGTCATCCCCACCTTCC	CACGCGAGTC	TGACCA	L1	P04	B6	Nippobare	Root	TSB	1	Rice	WildType
L1P04B7	ACGACTACAGTGACCA	AACMGGATTAGATACCCKG	ACGTCATCCCCACCTTCC	ACGACTACAG	TGACCA	L1	P04	B7	Nippobare	Root	TSB	1	Rice	WildType
L1P04B8	CGTAGACTAGTGACCA	AACMGGATTAGATACCCKG	ACGTCATCCCCACCTTCC	CGTAGACTAG	TGACCA	L1	P04	B8	Nippobare	Root	TSB	1	Rice	WildType
L1P04B9	TACGAGTATGTGACCA	AACMGGATTAGATACCCKG	ACGTCATCCCCACCTTCC	TACGAGTATG	TGACCA	L1	P04	B9	Nippobare	Root	TSB	1	Rice	WildType
L1P04B10	TACTCTCGTGTGACCA	AACMGGATTAGATACCCKG	ACGTCATCCCCACCTTCC	TACTCTCGTG	TGACCA	L1	P04	B10	Nippobare	Root	TSB	1	Rice	WildType
L1P04B11	TAGAGACGAGTGACCA	AACMGGATTAGATACCCKG	ACGTCATCCCCACCTTCC	TAGAGACGAG	TGACCA	L1	P04	B11	Nippobare	Root	TSB	1	Rice	WildType
L1P04B12	TCGTCGCTCGTGACCA	AACMGGATTAGATACCCKG	ACGTCATCCCCACCTTCC	TCGTCGCTCG	TGACCA	L1	P04	B12	Nippobare	Root	TSB	1	Rice	WildType
L1P04C1	ACATACGCGTTGACCA	AACMGGATTAGATACCCKG	ACGTCATCCCCACCTTCC	ACATACGCGT	TGACCA	L1	P04	C1	Nippobare	Root	TSB	1	Rice	WildType
L1P04C2	ACGCGAGTATTGACCA	AACMGGATTAGATACCCKG	ACGTCATCCCCACCTTCC	ACGCGAGTAT	TGACCA	L1	P04	C2	Nippobare	Root	TSB	1	Rice	WildType
L1P04C3	ACTACTATGTTGACCA	AACMGGATTAGATACCCKG	ACGTCATCCCCACCTTCC	ACTACTATGT	TGACCA	L1	P04	C3	Nippobare	Root	TSB	1	Rice	WildType
L1P04C4	ACTGTACAGTTGACCA	AACMGGATTAGATACCCKG	ACGTCATCCCCACCTTCC	ACTGTACAGT	TGACCA	L1	P04	C4	Nippobare	Root	TSB	1	Rice	WildType
L1P04C5	AGACTATACTTGACCA	AACMGGATTAGATACCCKG	ACGTCATCCCCACCTTCC	AGACTATACT	TGACCA	L1	P04	C5	Nippobare	Root	TSB	1	Rice	WildType
L1P04C6	AGCGTCGTCTTGACCA	AACMGGATTAGATACCCKG	ACGTCATCCCCACCTTCC	AGCGTCGTCT	TGACCA	L1	P04	C6	Nippobare	Root	TSB	1	Rice	WildType
L1P04C7	AGTACGCTATTGACCA	AACMGGATTAGATACCCKG	ACGTCATCCCCACCTTCC	AGTACGCTAT	TGACCA	L1	P04	C7	Nippobare	Root	TSB	1	Rice	WildType
L1P04C8	CACGCTACGATGACCA	AACMGGATTAGATACCCKG	ACGTCATCCCCACCTTCC	CACGCTACGA	TGACCA	L1	P04	C8	Nippobare	Root	TSB	1	Rice	WildType
L1P04C9	CACGCTACGTTGACCA	AACMGGATTAGATACCCKG	ACGTCATCCCCACCTTCC	CACGCTACGT	TGACCA	L1	P04	C9	Nippobare	Root	TSB	1	Rice	WildType
L1P04C10	CAGTAGACGTTGACCA	AACMGGATTAGATACCCKG	ACGTCATCCCCACCTTCC	CAGTAGACGT	TGACCA	L1	P04	C10	Nippobare	Root	TSB	1	Rice	WildType
L1P04C11	CGACGTGACTTGACCA	AACMGGATTAGATACCCKG	ACGTCATCCCCACCTTCC	CGACGTGACT	TGACCA	L1	P04	C11	Nippobare	Root	TSB	1	Rice	WildType
L1P04C12	CAGTCTCTAGTGACCA	AACMGGATTAGATACCCKG	ACGTCATCCCCACCTTCC	CAGTCTCTAG	TGACCA	L1	P04	C12	Nippobare	Root	TSB	1	Rice	WildType
L1P04D1	TACACGTGATTGACCA	AACMGGATTAGATACCCKG	ACGTCATCCCCACCTTCC	TACACGTGAT	TGACCA	L1	P04	D1	Nippobare	Root	TSB	1	Rice	WildType
L1P04D2	TACAGATCGTTGACCA	AACMGGATTAGATACCCKG	ACGTCATCCCCACCTTCC	TACAGATCGT	TGACCA	L1	P04	D2	Nippobare	Root	TSB	1	Rice	WildType
L1P04D3	TACGCTGTCTTGACCA	AACMGGATTAGATACCCKG	ACGTCATCCCCACCTTCC	TACGCTGTCT	TGACCA	L1	P04	D3	Nippobare	Root	TSB	1	Rice	WildType
L1P04D4	TAGTGTAGATTGACCA	AACMGGATTAGATACCCKG	ACGTCATCCCCACCTTCC	TAGTGTAGAT	TGACCA	L1	P04	D4	Nippobare	Root	TSB	1	Rice	WildType
L1P04D5	TCGATCACGTTGACCA	AACMGGATTAGATACCCKG	ACGTCATCCCCACCTTCC	TCGATCACGT	TGACCA	L1	P04	D5	Nippobare	Root	TSB	1	Rice	WildType
L1P04D6	TCGCACTAGTTGACCA	AACMGGATTAGATACCCKG	ACGTCATCCCCACCTTCC	TCGCACTAGT	TGACCA	L1	P04	D6	Nippobare	Root	TSB	1	Rice	WildType
L1P04D7	TCTAGCGACTTGACCA	AACMGGATTAGATACCCKG	ACGTCATCCCCACCTTCC	TCTAGCGACT	TGACCA	L1	P04	D7	Nippobare	Root	TSB	1	Rice	WildType
L1P04D8	CACGTGTATATGACCA	AACMGGATTAGATACCCKG	ACGTCATCCCCACCTTCC	CACGTGTATA	TGACCA	L1	P04	D8	Nippobare	Root	TSB	1	Rice	WildType
L1P04D9	TGACGTATGTTGACCA	AACMGGATTAGATACCCKG	ACGTCATCCCCACCTTCC	TGACGTATGT	TGACCA	L1	P04	D9	Nippobare	Root	TSB	1	Rice	WildType
L1P04D10	CACTACGATGTGACCA	AACMGGATTAGATACCCKG	ACGTCATCCCCACCTTCC	CACTACGATG	TGACCA	L1	P04	D10	Nippobare	Root	TSB	1	Rice	WildType
L1P04D11	ACAGTATATATGACCA	AACMGGATTAGATACCCKG	ACGTCATCCCCACCTTCC	ACAGTATATA	TGACCA	L1	P04	D11	Nippobare	Root	TSB	1	Rice	WildType
L1P04D12	ACGCGATCGATGACCA	AACMGGATTAGATACCCKG	ACGTCATCCCCACCTTCC	ACGCGATCGA	TGACCA	L1	P04	D12	Nippobare	Root	TSB	1	Rice	WildType
L1P04E1	ACTAGCAGTATGACCA	AACMGGATTAGATACCCKG	ACGTCATCCCCACCTTCC	ACTAGCAGTA	TGACCA	L1	P04	E1	Nippobare	Root	TSB	1	Rice	WildType
L1P04E2	AGCTCACGTATGACCA	AACMGGATTAGATACCCKG	ACGTCATCCCCACCTTCC	AGCTCACGTA	TGACCA	L1	P04	E2	Nippobare	Root	TSB	1	Rice	WildType
L1P04E3	AGTATACATATGACCA	AACMGGATTAGATACCCKG	ACGTCATCCCCACCTTCC	AGTATACATA	TGACCA	L1	P04	E3	Nippobare	Root	TSB	1	Rice	WildType
L1P04E4	AGTCGAGAGATGACCA	AACMGGATTAGATACCCKG	ACGTCATCCCCACCTTCC	AGTCGAGAGA	TGACCA	L1	P04	E4	Nippobare	Root	TSB	1	Rice	WildType
L1P04E5	AGTGCTACGATGACCA	AACMGGATTAGATACCCKG	ACGTCATCCCCACCTTCC	AGTGCTACGA	TGACCA	L1	P04	E5	Nippobare	Root	TSB	1	Rice	WildType
L1P04E6	CGATCGTATATGACCA	AACMGGATTAGATACCCKG	ACGTCATCCCCACCTTCC	CGATCGTATA	TGACCA	L1	P04	E6	Nippobare	Root	TSB	1	Rice	WildType
L1P04E7	CGCAGTACGATGACCA	AACMGGATTAGATACCCKG	ACGTCATCCCCACCTTCC	CGCAGTACGA	TGACCA	L1	P04	E7	Nippobare	Root	TSB	1	Rice	WildType
L1P04E8	CGCGTATACATGACCA	AACMGGATTAGATACCCKG	ACGTCATCCCCACCTTCC	CGCGTATACA	TGACCA	L1	P04	E8	Nippobare	Root	TSB	1	Rice	WildType
L1P04E9	CGTACAGTCATGACCA	AACMGGATTAGATACCCKG	ACGTCATCCCCACCTTCC	CGTACAGTCA	TGACCA	L1	P04	E9	Nippobare	Root	TSB	1	Rice	WildType
L1P04E10	CGTACTCAGATGACCA	AACMGGATTAGATACCCKG	ACGTCATCCCCACCTTCC	CGTACTCAGA	TGACCA	L1	P04	E10	Nippobare	Root	TSB	1	Rice	WildType
L1P04E11	CTACGCTCTATGACCA	AACMGGATTAGATACCCKG	ACGTCATCCCCACCTTCC	CTACGCTCTA	TGACCA	L1	P04	E11	Nippobare	Root	TSB	1	Rice	WildType
L1P04E12	CTATAGCGTATGACCA	AACMGGATTAGATACCCKG	ACGTCATCCCCACCTTCC	CTATAGCGTA	TGACCA	L1	P04	E12	Nippobare	Root	TSB	1	Rice	WildType
L1P04F1	TACGTCATCATGACCA	AACMGGATTAGATACCCKG	ACGTCATCCCCACCTTCC	TACGTCATCA	TGACCA	L1	P04	F1	Nippobare	Root	TSB	1	Rice	WildType
L1P04F2	TAGTCGCATATGACCA	AACMGGATTAGATACCCKG	ACGTCATCCCCACCTTCC	TAGTCGCATA	TGACCA	L1	P04	F2	Nippobare	Root	TSB	1	Rice	WildType
L1P04F3	TATATATACATGACCA	AACMGGATTAGATACCCKG	ACGTCATCCCCACCTTCC	TATATATACA	TGACCA	L1	P04	F3	Nippobare	Root	TSB	1	Rice	WildType
L1P04F4	TATGCTAGTATGACCA	AACMGGATTAGATACCCKG	ACGTCATCCCCACCTTCC	TATGCTAGTA	TGACCA	L1	P04	F4	Nippobare	Root	TSB	1	Rice	WildType
L1P04F5	TCACGCGAGATGACCA	AACMGGATTAGATACCCKG	ACGTCATCCCCACCTTCC	TCACGCGAGA	TGACCA	L1	P04	F5	Nippobare	Root	TSB	1	Rice	WildType
L1P04F6	TCGATAGTGATGACCA	AACMGGATTAGATACCCKG	ACGTCATCCCCACCTTCC	TCGATAGTGA	TGACCA	L1	P04	F6	Nippobare	Root	TSB	1	Rice	WildType
L1P04F7	TCGCTGCGTATGACCA	AACMGGATTAGATACCCKG	ACGTCATCCCCACCTTCC	TCGCTGCGTA	TGACCA	L1	P04	F7	Nippobare	Root	TSB	1	Rice	WildType
L1P04F8	TCTGACGTCATGACCA	AACMGGATTAGATACCCKG	ACGTCATCCCCACCTTCC	TCTGACGTCA	TGACCA	L1	P04	F8	Nippobare	Root	TSB	1	Rice	WildType
L1P04F9	TGAGTCAGTATGACCA	AACMGGATTAGATACCCKG	ACGTCATCCCCACCTTCC	TGAGTCAGTA	TGACCA	L1	P04	F9	Nippobare	Root	TSB	1	Rice	WildType
L1P04F10	CACTATACTCTGACCA	AACMGGATTAGATACCCKG	ACGTCATCCCCACCTTCC	CACTATACTC	TGACCA	L1	P04	F10	Nippobare	Root	TSB	1	Rice	WildType
L1P04F11	TGTCACACGATGACCA	AACMGGATTAGATACCCKG	ACGTCATCCCCACCTTCC	TGTCACACGA	TGACCA	L1	P04	F11	Nippobare	Root	TSB	1	Rice	WildType
L1P04F12	TGTCGTCGCATGACCA	AACMGGATTAGATACCCKG	ACGTCATCCCCACCTTCC	TGTCGTCGCA	TGACCA	L1	P04	F12	Nippobare	Root	TSB	1	Rice	WildType
L1P04G1	ACACATACGCTGACCA	AACMGGATTAGATACCCKG	ACGTCATCCCCACCTTCC	ACACATACGC	TGACCA	L1	P04	G1	Nippobare	Root	TSB	1	Rice	WildType
L1P04G2	ACAGTCGTGCTGACCA	AACMGGATTAGATACCCKG	ACGTCATCCCCACCTTCC	ACAGTCGTGC	TGACCA	L1	P04	G2	Nippobare	Root	TSB	1	Rice	WildType
L1P04G3	ACATGACGACTGACCA	AACMGGATTAGATACCCKG	ACGTCATCCCCACCTTCC	ACATGACGAC	TGACCA	L1	P04	G3	Nippobare	Root	TSB	1	Rice	WildType
L1P04G4	ACGACAGCTCTGACCA	AACMGGATTAGATACCCKG	ACGTCATCCCCACCTTCC	ACGACAGCTC	TGACCA	L1	P04	G4	Nippobare	Root	TSB	1	Rice	WildType
L1P04G5	ACGTCTCATCTGACCA	AACMGGATTAGATACCCKG	ACGTCATCCCCACCTTCC	ACGTCTCATC	TGACCA	L1	P04	G5	Nippobare	Root	TSB	1	Rice	WildType
L1P04G6	ACTCATCTACTGACCA	AACMGGATTAGATACCCKG	ACGTCATCCCCACCTTCC	ACTCATCTAC	TGACCA	L1	P04	G6	Nippobare	Root	TSB	1	Rice	WildType
L1P04G7	ACTCGCGCACTGACCA	AACMGGATTAGATACCCKG	ACGTCATCCCCACCTTCC	ACTCGCGCAC	TGACCA	L1	P04	G7	Nippobare	Root	TSB	1	Rice	WildType
L1P04G8	AGAGCGTCACTGACCA	AACMGGATTAGATACCCKG	ACGTCATCCCCACCTTCC	AGAGCGTCAC	TGACCA	L1	P04	G8	Nippobare	Root	TSB	1	Rice	WildType
L1P04G9	AGCGACTAGCTGACCA	AACMGGATTAGATACCCKG	ACGTCATCCCCACCTTCC	AGCGACTAGC	TGACCA	L1	P04	G9	Nippobare	Root	TSB	1	Rice	WildType
L1P04G10	CAGCGTACTGTGACCA	AACMGGATTAGATACCCKG	ACGTCATCCCCACCTTCC	CAGCGTACTG	TGACCA	L1	P04	G10	Nippobare	Root	TSB	1	Rice	WildType
L1P04G11	AGTGACACACTGACCA	AACMGGATTAGATACCCKG	ACGTCATCCCCACCTTCC	AGTGACACAC	TGACCA	L1	P04	G11	Nippobare	Root	TSB	1	Rice	WildType
L1P04G12	AGTGTATGTCTGACCA	AACMGGATTAGATACCCKG	ACGTCATCCCCACCTTCC	AGTGTATGTC	TGACCA	L1	P04	G12	Nippobare	Root	TSB	1	Rice	WildType
L1P04H1	ATAGATAGACTGACCA	AACMGGATTAGATACCCKG	ACGTCATCCCCACCTTCC	ATAGATAGAC	TGACCA	L1	P04	H1	Nippobare	Root	TSB	1	Rice	WildType
L1P04H2	ATATAGTCGCTGACCA	AACMGGATTAGATACCCKG	ACGTCATCCCCACCTTCC	ATATAGTCGC	TGACCA	L1	P04	H2	Nippobare	Root	TSB	1	Rice	WildType
L1P04H3	ATCTACTGACTGACCA	AACMGGATTAGATACCCKG	ACGTCATCCCCACCTTCC	ATCTACTGAC	TGACCA	L1	P04	H3	Nippobare	Root	TSB	1	Rice	WildType
L1P04H4	CACGTAGATCTGACCA	AACMGGATTAGATACCCKG	ACGTCATCCCCACCTTCC	CACGTAGATC	TGACCA	L1	P04	H4	Nippobare	Root	TSB	1	Rice	WildType
L1P04H5	CACGTCTCGCTGACCA	AACMGGATTAGATACCCKG	ACGTCATCCCCACCTTCC	CACGTCTCGC	TGACCA	L1	P04	H5	Nippobare	Root	TSB	1	Rice	WildType
L1P04H6	CATACTCTACTGACCA	AACMGGATTAGATACCCKG	ACGTCATCCCCACCTTCC	CATACTCTAC	TGACCA	L1	P04	H6	Nippobare	Root	TSB	1	Rice	WildType
L1P04H7	CGACACTATCTGACCA	AACMGGATTAGATACCCKG	ACGTCATCCCCACCTTCC	CGACACTATC	TGACCA	L1	P04	H7	Nippobare	Root	TSB	1	Rice	WildType
L1P04H8	CGAGACGCGCTGACCA	AACMGGATTAGATACCCKG	ACGTCATCCCCACCTTCC	CGAGACGCGC	TGACCA	L1	P04	H8	Nippobare	Root	TSB	1	Rice	WildType
L1P04H9	CGTATGCGACTGACCA	AACMGGATTAGATACCCKG	ACGTCATCCCCACCTTCC	CGTATGCGAC	TGACCA	L1	P04	H9	Nippobare	Root	TSB	1	Rice	WildType
L1P04H10	CGTCGATCTCTGACCA	AACMGGATTAGATACCCKG	ACGTCATCCCCACCTTCC	CGTCGATCTC	TGACCA	L1	P04	H10	Nippobare	Root	TSB	1	Rice	WildType
L1P04H11	CTACGACTGCTGACCA	AACMGGATTAGATACCCKG	ACGTCATCCCCACCTTCC	CTACGACTGC	TGACCA	L1	P04	H11	Nippobare	Root	TSB	1	Rice	WildType
L1P04H12	CTAGTCACTCTGACCA	AACMGGATTAGATACCCKG	ACGTCATCCCCACCTTCC	CTAGTCACTC	TGACCA	L1	P04	H12	Nippobare	Root	TSB	1	Rice	WildType
L1P05A1	ACGCTCGACAACAGTG	AACMGGATTAGATACCCKG	ACGTCATCCCCACCTTCC	ACGCTCGACA	ACAGTG	L1	P05	A1	Nippobare	Root	TSB	1	Rice	WildType
L1P05A2	AGACGCACTCACAGTG	AACMGGATTAGATACCCKG	ACGTCATCCCCACCTTCC	AGACGCACTC	ACAGTG	L1	P05	A2	Nippobare	Root	TSB	1	Rice	WildType
L1P05A3	AGCACTGTAGACAGTG	AACMGGATTAGATACCCKG	ACGTCATCCCCACCTTCC	AGCACTGTAG	ACAGTG	L1	P05	A3	Nippobare	Root	TSB	1	Rice	WildType
L1P05A4	ATCAGACACGACAGTG	AACMGGATTAGATACCCKG	ACGTCATCCCCACCTTCC	ATCAGACACG	ACAGTG	L1	P05	A4	Nippobare	Root	TSB	1	Rice	WildType
L1P05A5	ATATCGCGAGACAGTG	AACMGGATTAGATACCCKG	ACGTCATCCCCACCTTCC	ATATCGCGAG	ACAGTG	L1	P05	A5	Nippobare	Root	TSB	1	Rice	WildType
L1P05A6	CACGAGACAGACAGTG	AACMGGATTAGATACCCKG	ACGTCATCCCCACCTTCC	CACGAGACAG	ACAGTG	L1	P05	A6	Nippobare	Root	TSB	1	Rice	WildType
L1P05A7	CTCGCGTGTCACAGTG	AACMGGATTAGATACCCKG	ACGTCATCCCCACCTTCC	CTCGCGTGTC	ACAGTG	L1	P05	A7	Nippobare	Root	TSB	1	Rice	WildType
L1P05A8	TAGTATCAGCACAGTG	AACMGGATTAGATACCCKG	ACGTCATCCCCACCTTCC	TAGTATCAGC	ACAGTG	L1	P05	A8	Nippobare	Root	TSB	1	Rice	WildType
L1P05A9	TCTCTATGCGACAGTG	AACMGGATTAGATACCCKG	ACGTCATCCCCACCTTCC	TCTCTATGCG	ACAGTG	L1	P05	A9	Nippobare	Root	TSB	1	Rice	WildType
L1P05A10	TGATACGTCTACAGTG	AACMGGATTAGATACCCKG	ACGTCATCCCCACCTTCC	TGATACGTCT	ACAGTG	L1	P05	A10	Nippobare	Root	TSB	1	Rice	WildType
L1P05A11	TACTGAGCTAACAGTG	AACMGGATTAGATACCCKG	ACGTCATCCCCACCTTCC	TACTGAGCTA	ACAGTG	L1	P05	A11	Nippobare	Root	TSB	1	Rice	WildType
L1P05A12	CATAGTAGTGACAGTG	AACMGGATTAGATACCCKG	ACGTCATCCCCACCTTCC	CATAGTAGTG	ACAGTG	L1	P05	A12	Nippobare	Root	TSB	1	Rice	WildType
L1P05B1	CGAGAGATACACAGTG	AACMGGATTAGATACCCKG	ACGTCATCCCCACCTTCC	CGAGAGATAC	ACAGTG	L1	P05	B1	Nippobare	Root	TSB	1	Rice	WildType
L1P05B2	ATACGACGTAACAGTG	AACMGGATTAGATACCCKG	ACGTCATCCCCACCTTCC	ATACGACGTA	ACAGTG	L1	P05	B2	Nippobare	Root	TSB	1	Rice	WildType
L1P05B3	TCACGTACTAACAGTG	AACMGGATTAGATACCCKG	ACGTCATCCCCACCTTCC	TCACGTACTA	ACAGTG	L1	P05	B3	Nippobare	Root	TSB	1	Rice	WildType
L1P05B4	CGTCTAGTACACAGTG	AACMGGATTAGATACCCKG	ACGTCATCCCCACCTTCC	CGTCTAGTAC	ACAGTG	L1	P05	B4	Nippobare	Root	TSB	1	Rice	WildType
L1P05B5	TCTACGTAGCACAGTG	AACMGGATTAGATACCCKG	ACGTCATCCCCACCTTCC	TCTACGTAGC	ACAGTG	L1	P05	B5	Nippobare	Root	TSB	1	Rice	WildType
L1P05B6	CACGCGAGTCACAGTG	AACMGGATTAGATACCCKG	ACGTCATCCCCACCTTCC	CACGCGAGTC	ACAGTG	L1	P05	B6	Nippobare	Root	TSB	1	Rice	WildType
L1P05B7	ACGACTACAGACAGTG	AACMGGATTAGATACCCKG	ACGTCATCCCCACCTTCC	ACGACTACAG	ACAGTG	L1	P05	B7	Nippobare	Root	TSB	1	Rice	WildType
L1P05B8	CGTAGACTAGACAGTG	AACMGGATTAGATACCCKG	ACGTCATCCCCACCTTCC	CGTAGACTAG	ACAGTG	L1	P05	B8	Nippobare	Root	TSB	1	Rice	WildType
L1P05B9	TACGAGTATGACAGTG	AACMGGATTAGATACCCKG	ACGTCATCCCCACCTTCC	TACGAGTATG	ACAGTG	L1	P05	B9	Nippobare	Root	TSB	1	Rice	WildType
L1P05B10	TACTCTCGTGACAGTG	AACMGGATTAGATACCCKG	ACGTCATCCCCACCTTCC	TACTCTCGTG	ACAGTG	L1	P05	B10	Nippobare	Root	TSB	1	Rice	WildType
L1P05B11	TAGAGACGAGACAGTG	AACMGGATTAGATACCCKG	ACGTCATCCCCACCTTCC	TAGAGACGAG	ACAGTG	L1	P05	B11	Nippobare	Root	TSB	1	Rice	WildType
L1P05B12	TCGTCGCTCGACAGTG	AACMGGATTAGATACCCKG	ACGTCATCCCCACCTTCC	TCGTCGCTCG	ACAGTG	L1	P05	B12	Nippobare	Root	TSB	1	Rice	WildType
L1P05C1	ACATACGCGTACAGTG	AACMGGATTAGATACCCKG	ACGTCATCCCCACCTTCC	ACATACGCGT	ACAGTG	L1	P05	C1	Nippobare	Root	TSB	1	Rice	WildType
L1P05C2	ACGCGAGTATACAGTG	AACMGGATTAGATACCCKG	ACGTCATCCCCACCTTCC	ACGCGAGTAT	ACAGTG	L1	P05	C2	Nippobare	Root	TSB	1	Rice	WildType
L1P05C3	ACTACTATGTACAGTG	AACMGGATTAGATACCCKG	ACGTCATCCCCACCTTCC	ACTACTATGT	ACAGTG	L1	P05	C3	Nippobare	Root	TSB	1	Rice	WildType
L1P05C4	ACTGTACAGTACAGTG	AACMGGATTAGATACCCKG	ACGTCATCCCCACCTTCC	ACTGTACAGT	ACAGTG	L1	P05	C4	Nippobare	Root	TSB	1	Rice	WildType
L1P05C5	AGACTATACTACAGTG	AACMGGATTAGATACCCKG	ACGTCATCCCCACCTTCC	AGACTATACT	ACAGTG	L1	P05	C5	Nippobare	Root	TSB	1	Rice	WildType
L1P05C6	AGCGTCGTCTACAGTG	AACMGGATTAGATACCCKG	ACGTCATCCCCACCTTCC	AGCGTCGTCT	ACAGTG	L1	P05	C6	Nippobare	Root	TSB	1	Rice	WildType
L1P05C7	AGTACGCTATACAGTG	AACMGGATTAGATACCCKG	ACGTCATCCCCACCTTCC	AGTACGCTAT	ACAGTG	L1	P05	C7	Nippobare	Root	TSB	1	Rice	WildType
L1P05C8	CACGCTACGAACAGTG	AACMGGATTAGATACCCKG	ACGTCATCCCCACCTTCC	CACGCTACGA	ACAGTG	L1	P05	C8	Nippobare	Root	TSB	1	Rice	WildType
L1P05C9	CACGCTACGTACAGTG	AACMGGATTAGATACCCKG	ACGTCATCCCCACCTTCC	CACGCTACGT	ACAGTG	L1	P05	C9	Nippobare	Root	TSB	1	Rice	WildType
L1P05C10	CAGTAGACGTACAGTG	AACMGGATTAGATACCCKG	ACGTCATCCCCACCTTCC	CAGTAGACGT	ACAGTG	L1	P05	C10	Nippobare	Root	TSB	1	Rice	WildType
L1P05C11	CGACGTGACTACAGTG	AACMGGATTAGATACCCKG	ACGTCATCCCCACCTTCC	CGACGTGACT	ACAGTG	L1	P05	C11	Nippobare	Root	TSB	1	Rice	WildType
L1P05C12	CAGTCTCTAGACAGTG	AACMGGATTAGATACCCKG	ACGTCATCCCCACCTTCC	CAGTCTCTAG	ACAGTG	L1	P05	C12	Nippobare	Root	TSB	1	Rice	WildType
L1P05D1	TACACGTGATACAGTG	AACMGGATTAGATACCCKG	ACGTCATCCCCACCTTCC	TACACGTGAT	ACAGTG	L1	P05	D1	Nippobare	Root	TSB	1	Rice	WildType
L1P05D2	TACAGATCGTACAGTG	AACMGGATTAGATACCCKG	ACGTCATCCCCACCTTCC	TACAGATCGT	ACAGTG	L1	P05	D2	Nippobare	Root	TSB	1	Rice	WildType
L1P05D3	TACGCTGTCTACAGTG	AACMGGATTAGATACCCKG	ACGTCATCCCCACCTTCC	TACGCTGTCT	ACAGTG	L1	P05	D3	Nippobare	Root	TSB	1	Rice	WildType
L1P05D4	TAGTGTAGATACAGTG	AACMGGATTAGATACCCKG	ACGTCATCCCCACCTTCC	TAGTGTAGAT	ACAGTG	L1	P05	D4	Nippobare	Root	TSB	1	Rice	WildType
L1P05D5	TCGATCACGTACAGTG	AACMGGATTAGATACCCKG	ACGTCATCCCCACCTTCC	TCGATCACGT	ACAGTG	L1	P05	D5	Nippobare	Root	TSB	1	Rice	WildType
L1P05D6	TCGCACTAGTACAGTG	AACMGGATTAGATACCCKG	ACGTCATCCCCACCTTCC	TCGCACTAGT	ACAGTG	L1	P05	D6	Nippobare	Root	TSB	1	Rice	WildType
L1P05D7	TCTAGCGACTACAGTG	AACMGGATTAGATACCCKG	ACGTCATCCCCACCTTCC	TCTAGCGACT	ACAGTG	L1	P05	D7	Nippobare	Root	TSB	1	Rice	WildType
L1P05D8	CACGTGTATAACAGTG	AACMGGATTAGATACCCKG	ACGTCATCCCCACCTTCC	CACGTGTATA	ACAGTG	L1	P05	D8	Nippobare	Root	TSB	1	Rice	WildType
L1P05D9	TGACGTATGTACAGTG	AACMGGATTAGATACCCKG	ACGTCATCCCCACCTTCC	TGACGTATGT	ACAGTG	L1	P05	D9	Nippobare	Root	TSB	1	Rice	WildType
L1P05D10	CACTACGATGACAGTG	AACMGGATTAGATACCCKG	ACGTCATCCCCACCTTCC	CACTACGATG	ACAGTG	L1	P05	D10	Nippobare	Root	TSB	1	Rice	WildType
L1P05D11	ACAGTATATAACAGTG	AACMGGATTAGATACCCKG	ACGTCATCCCCACCTTCC	ACAGTATATA	ACAGTG	L1	P05	D11	Nippobare	Root	TSB	1	Rice	WildType
L1P05D12	ACGCGATCGAACAGTG	AACMGGATTAGATACCCKG	ACGTCATCCCCACCTTCC	ACGCGATCGA	ACAGTG	L1	P05	D12	Nippobare	Root	TSB	1	Rice	WildType
L1P05E1	ACTAGCAGTAACAGTG	AACMGGATTAGATACCCKG	ACGTCATCCCCACCTTCC	ACTAGCAGTA	ACAGTG	L1	P05	E1	Nippobare	Root	TSB	1	Rice	WildType
L1P05E2	AGCTCACGTAACAGTG	AACMGGATTAGATACCCKG	ACGTCATCCCCACCTTCC	AGCTCACGTA	ACAGTG	L1	P05	E2	Nippobare	Root	TSB	1	Rice	WildType
L1P05E3	AGTATACATAACAGTG	AACMGGATTAGATACCCKG	ACGTCATCCCCACCTTCC	AGTATACATA	ACAGTG	L1	P05	E3	Nippobare	Root	TSB	1	Rice	WildType
L1P05E4	AGTCGAGAGAACAGTG	AACMGGATTAGATACCCKG	ACGTCATCCCCACCTTCC	AGTCGAGAGA	ACAGTG	L1	P05	E4	Nippobare	Root	TSB	1	Rice	WildType
L1P05E5	AGTGCTACGAACAGTG	AACMGGATTAGATACCCKG	ACGTCATCCCCACCTTCC	AGTGCTACGA	ACAGTG	L1	P05	E5	Nippobare	Root	TSB	1	Rice	WildType
L1P05E6	CGATCGTATAACAGTG	AACMGGATTAGATACCCKG	ACGTCATCCCCACCTTCC	CGATCGTATA	ACAGTG	L1	P05	E6	Nippobare	Root	TSB	1	Rice	WildType
L1P05E7	CGCAGTACGAACAGTG	AACMGGATTAGATACCCKG	ACGTCATCCCCACCTTCC	CGCAGTACGA	ACAGTG	L1	P05	E7	Nippobare	Root	TSB	1	Rice	WildType
L1P05E8	CGCGTATACAACAGTG	AACMGGATTAGATACCCKG	ACGTCATCCCCACCTTCC	CGCGTATACA	ACAGTG	L1	P05	E8	Nippobare	Root	TSB	1	Rice	WildType
L1P05E9	CGTACAGTCAACAGTG	AACMGGATTAGATACCCKG	ACGTCATCCCCACCTTCC	CGTACAGTCA	ACAGTG	L1	P05	E9	Nippobare	Root	TSB	1	Rice	WildType
L1P05E10	CGTACTCAGAACAGTG	AACMGGATTAGATACCCKG	ACGTCATCCCCACCTTCC	CGTACTCAGA	ACAGTG	L1	P05	E10	Nippobare	Root	TSB	1	Rice	WildType
L1P05E11	CTACGCTCTAACAGTG	AACMGGATTAGATACCCKG	ACGTCATCCCCACCTTCC	CTACGCTCTA	ACAGTG	L1	P05	E11	Nippobare	Root	TSB	1	Rice	WildType
L1P05E12	CTATAGCGTAACAGTG	AACMGGATTAGATACCCKG	ACGTCATCCCCACCTTCC	CTATAGCGTA	ACAGTG	L1	P05	E12	Nippobare	Root	TSB	1	Rice	WildType
L1P05F1	TACGTCATCAACAGTG	AACMGGATTAGATACCCKG	ACGTCATCCCCACCTTCC	TACGTCATCA	ACAGTG	L1	P05	F1	Nippobare	Root	TSB	1	Rice	WildType
L1P05F2	TAGTCGCATAACAGTG	AACMGGATTAGATACCCKG	ACGTCATCCCCACCTTCC	TAGTCGCATA	ACAGTG	L1	P05	F2	Nippobare	Root	TSB	1	Rice	WildType
L1P05F3	TATATATACAACAGTG	AACMGGATTAGATACCCKG	ACGTCATCCCCACCTTCC	TATATATACA	ACAGTG	L1	P05	F3	Nippobare	Root	TSB	1	Rice	WildType
L1P05F4	TATGCTAGTAACAGTG	AACMGGATTAGATACCCKG	ACGTCATCCCCACCTTCC	TATGCTAGTA	ACAGTG	L1	P05	F4	Nippobare	Root	TSB	1	Rice	WildType
L1P05F5	TCACGCGAGAACAGTG	AACMGGATTAGATACCCKG	ACGTCATCCCCACCTTCC	TCACGCGAGA	ACAGTG	L1	P05	F5	Nippobare	Root	TSB	1	Rice	WildType
L1P05F6	TCGATAGTGAACAGTG	AACMGGATTAGATACCCKG	ACGTCATCCCCACCTTCC	TCGATAGTGA	ACAGTG	L1	P05	F6	Nippobare	Root	TSB	1	Rice	WildType
L1P05F7	TCGCTGCGTAACAGTG	AACMGGATTAGATACCCKG	ACGTCATCCCCACCTTCC	TCGCTGCGTA	ACAGTG	L1	P05	F7	Nippobare	Root	TSB	1	Rice	WildType
L1P05F8	TCTGACGTCAACAGTG	AACMGGATTAGATACCCKG	ACGTCATCCCCACCTTCC	TCTGACGTCA	ACAGTG	L1	P05	F8	Nippobare	Root	TSB	1	Rice	WildType
L1P05F9	TGAGTCAGTAACAGTG	AACMGGATTAGATACCCKG	ACGTCATCCCCACCTTCC	TGAGTCAGTA	ACAGTG	L1	P05	F9	Nippobare	Root	TSB	1	Rice	WildType
L1P05F10	CACTATACTCACAGTG	AACMGGATTAGATACCCKG	ACGTCATCCCCACCTTCC	CACTATACTC	ACAGTG	L1	P05	F10	Nippobare	Root	TSB	1	Rice	WildType
L1P05F11	TGTCACACGAACAGTG	AACMGGATTAGATACCCKG	ACGTCATCCCCACCTTCC	TGTCACACGA	ACAGTG	L1	P05	F11	Nippobare	Root	TSB	1	Rice	WildType
L1P05F12	TGTCGTCGCAACAGTG	AACMGGATTAGATACCCKG	ACGTCATCCCCACCTTCC	TGTCGTCGCA	ACAGTG	L1	P05	F12	Nippobare	Root	TSB	1	Rice	WildType
L1P05G1	ACACATACGCACAGTG	AACMGGATTAGATACCCKG	ACGTCATCCCCACCTTCC	ACACATACGC	ACAGTG	L1	P05	G1	Nippobare	Root	TSB	1	Rice	WildType
L1P05G2	ACAGTCGTGCACAGTG	AACMGGATTAGATACCCKG	ACGTCATCCCCACCTTCC	ACAGTCGTGC	ACAGTG	L1	P05	G2	Nippobare	Root	TSB	1	Rice	WildType
L1P05G3	ACATGACGACACAGTG	AACMGGATTAGATACCCKG	ACGTCATCCCCACCTTCC	ACATGACGAC	ACAGTG	L1	P05	G3	Nippobare	Root	TSB	1	Rice	WildType
L1P05G4	ACGACAGCTCACAGTG	AACMGGATTAGATACCCKG	ACGTCATCCCCACCTTCC	ACGACAGCTC	ACAGTG	L1	P05	G4	Nippobare	Root	TSB	1	Rice	WildType
L1P05G5	ACGTCTCATCACAGTG	AACMGGATTAGATACCCKG	ACGTCATCCCCACCTTCC	ACGTCTCATC	ACAGTG	L1	P05	G5	Nippobare	Root	TSB	1	Rice	WildType
L1P05G6	ACTCATCTACACAGTG	AACMGGATTAGATACCCKG	ACGTCATCCCCACCTTCC	ACTCATCTAC	ACAGTG	L1	P05	G6	Nippobare	Root	TSB	1	Rice	WildType
L1P05G7	ACTCGCGCACACAGTG	AACMGGATTAGATACCCKG	ACGTCATCCCCACCTTCC	ACTCGCGCAC	ACAGTG	L1	P05	G7	Nippobare	Root	TSB	1	Rice	WildType
L1P05G8	AGAGCGTCACACAGTG	AACMGGATTAGATACCCKG	ACGTCATCCCCACCTTCC	AGAGCGTCAC	ACAGTG	L1	P05	G8	Nippobare	Root	TSB	1	Rice	WildType
L1P05G9	AGCGACTAGCACAGTG	AACMGGATTAGATACCCKG	ACGTCATCCCCACCTTCC	AGCGACTAGC	ACAGTG	L1	P05	G9	Nippobare	Root	TSB	1	Rice	WildType
L1P05G10	CAGCGTACTGACAGTG	AACMGGATTAGATACCCKG	ACGTCATCCCCACCTTCC	CAGCGTACTG	ACAGTG	L1	P05	G10	Nippobare	Root	TSB	1	Rice	WildType
L1P05G11	AGTGACACACACAGTG	AACMGGATTAGATACCCKG	ACGTCATCCCCACCTTCC	AGTGACACAC	ACAGTG	L1	P05	G11	Nippobare	Root	TSB	1	Rice	WildType
L1P05G12	AGTGTATGTCACAGTG	AACMGGATTAGATACCCKG	ACGTCATCCCCACCTTCC	AGTGTATGTC	ACAGTG	L1	P05	G12	Nippobare	Root	TSB	1	Rice	WildType
L1P05H1	ATAGATAGACACAGTG	AACMGGATTAGATACCCKG	ACGTCATCCCCACCTTCC	ATAGATAGAC	ACAGTG	L1	P05	H1	Nippobare	Root	TSB	1	Rice	WildType
L1P05H2	ATATAGTCGCACAGTG	AACMGGATTAGATACCCKG	ACGTCATCCCCACCTTCC	ATATAGTCGC	ACAGTG	L1	P05	H2	Nippobare	Root	TSB	1	Rice	WildType
L1P05H3	ATCTACTGACACAGTG	AACMGGATTAGATACCCKG	ACGTCATCCCCACCTTCC	ATCTACTGAC	ACAGTG	L1	P05	H3	Nippobare	Root	TSB	1	Rice	WildType
L1P05H4	CACGTAGATCACAGTG	AACMGGATTAGATACCCKG	ACGTCATCCCCACCTTCC	CACGTAGATC	ACAGTG	L1	P05	H4	Nippobare	Root	TSB	1	Rice	WildType
L1P05H5	CACGTCTCGCACAGTG	AACMGGATTAGATACCCKG	ACGTCATCCCCACCTTCC	CACGTCTCGC	ACAGTG	L1	P05	H5	Nippobare	Root	TSB	1	Rice	WildType
L1P05H6	CATACTCTACACAGTG	AACMGGATTAGATACCCKG	ACGTCATCCCCACCTTCC	CATACTCTAC	ACAGTG	L1	P05	H6	Nippobare	Root	TSB	1	Rice	WildType
L1P05H7	CGACACTATCACAGTG	AACMGGATTAGATACCCKG	ACGTCATCCCCACCTTCC	CGACACTATC	ACAGTG	L1	P05	H7	Nippobare	Root	TSB	1	Rice	WildType
L1P05H8	CGAGACGCGCACAGTG	AACMGGATTAGATACCCKG	ACGTCATCCCCACCTTCC	CGAGACGCGC	ACAGTG	L1	P05	H8	Nippobare	Root	TSB	1	Rice	WildType
L1P05H9	CGTATGCGACACAGTG	AACMGGATTAGATACCCKG	ACGTCATCCCCACCTTCC	CGTATGCGAC	ACAGTG	L1	P05	H9	Nippobare	Root	TSB	1	Rice	WildType
L1P05H10	CGTCGATCTCACAGTG	AACMGGATTAGATACCCKG	ACGTCATCCCCACCTTCC	CGTCGATCTC	ACAGTG	L1	P05	H10	Nippobare	Root	TSB	1	Rice	WildType
L1P05H11	CTACGACTGCACAGTG	AACMGGATTAGATACCCKG	ACGTCATCCCCACCTTCC	CTACGACTGC	ACAGTG	L1	P05	H11	Nippobare	Root	TSB	1	Rice	WildType
L1P05H12	CTAGTCACTCACAGTG	AACMGGATTAGATACCCKG	ACGTCATCCCCACCTTCC	CTAGTCACTC	ACAGTG	L1	P05	H12	Nippobare	Root	TSB	1	Rice	WildType
L1P06A1	ACGCTCGACAGCCAAT	AACMGGATTAGATACCCKG	ACGTCATCCCCACCTTCC	ACGCTCGACA	GCCAAT	L1	P06	A1	Nippobare	Root	TSB	1	Rice	WildType
L1P06A2	AGACGCACTCGCCAAT	AACMGGATTAGATACCCKG	ACGTCATCCCCACCTTCC	AGACGCACTC	GCCAAT	L1	P06	A2	Nippobare	Root	TSB	1	Rice	WildType
L1P06A3	AGCACTGTAGGCCAAT	AACMGGATTAGATACCCKG	ACGTCATCCCCACCTTCC	AGCACTGTAG	GCCAAT	L1	P06	A3	Nippobare	Root	TSB	1	Rice	WildType
L1P06A4	ATCAGACACGGCCAAT	AACMGGATTAGATACCCKG	ACGTCATCCCCACCTTCC	ATCAGACACG	GCCAAT	L1	P06	A4	Nippobare	Root	TSB	1	Rice	WildType
L1P06A5	ATATCGCGAGGCCAAT	AACMGGATTAGATACCCKG	ACGTCATCCCCACCTTCC	ATATCGCGAG	GCCAAT	L1	P06	A5	Nippobare	Root	TSB	1	Rice	WildType
L1P06A6	CACGAGACAGGCCAAT	AACMGGATTAGATACCCKG	ACGTCATCCCCACCTTCC	CACGAGACAG	GCCAAT	L1	P06	A6	Nippobare	Root	TSB	1	Rice	WildType
L1P06A7	CTCGCGTGTCGCCAAT	AACMGGATTAGATACCCKG	ACGTCATCCCCACCTTCC	CTCGCGTGTC	GCCAAT	L1	P06	A7	Nippobare	Root	TSB	1	Rice	WildType
L1P06A8	TAGTATCAGCGCCAAT	AACMGGATTAGATACCCKG	ACGTCATCCCCACCTTCC	TAGTATCAGC	GCCAAT	L1	P06	A8	Nippobare	Root	TSB	1	Rice	WildType
L1P06A9	TCTCTATGCGGCCAAT	AACMGGATTAGATACCCKG	ACGTCATCCCCACCTTCC	TCTCTATGCG	GCCAAT	L1	P06	A9	Nippobare	Root	TSB	1	Rice	WildType
L1P06A10	TGATACGTCTGCCAAT	AACMGGATTAGATACCCKG	ACGTCATCCCCACCTTCC	TGATACGTCT	GCCAAT	L1	P06	A10	Nippobare	Root	TSB	1	Rice	WildType
L1P06A11	TACTGAGCTAGCCAAT	AACMGGATTAGATACCCKG	ACGTCATCCCCACCTTCC	TACTGAGCTA	GCCAAT	L1	P06	A11	Nippobare	Root	TSB	1	Rice	WildType
L1P06A12	CATAGTAGTGGCCAAT	AACMGGATTAGATACCCKG	ACGTCATCCCCACCTTCC	CATAGTAGTG	GCCAAT	L1	P06	A12	Nippobare	Root	TSB	1	Rice	WildType
L1P06B1	CGAGAGATACGCCAAT	AACMGGATTAGATACCCKG	ACGTCATCCCCACCTTCC	CGAGAGATAC	GCCAAT	L1	P06	B1	Nippobare	Root	TSB	1	Rice	WildType
L1P06B2	ATACGACGTAGCCAAT	AACMGGATTAGATACCCKG	ACGTCATCCCCACCTTCC	ATACGACGTA	GCCAAT	L1	P06	B2	Nippobare	Root	TSB	1	Rice	WildType
L1P06B3	TCACGTACTAGCCAAT	AACMGGATTAGATACCCKG	ACGTCATCCCCACCTTCC	TCACGTACTA	GCCAAT	L1	P06	B3	Nippobare	Root	TSB	1	Rice	WildType
L1P06B4	CGTCTAGTACGCCAAT	AACMGGATTAGATACCCKG	ACGTCATCCCCACCTTCC	CGTCTAGTAC	GCCAAT	L1	P06	B4	Nippobare	Root	TSB	1	Rice	WildType
L1P06B5	TCTACGTAGCGCCAAT	AACMGGATTAGATACCCKG	ACGTCATCCCCACCTTCC	TCTACGTAGC	GCCAAT	L1	P06	B5	Nippobare	Root	TSB	1	Rice	WildType
L1P06B6	CACGCGAGTCGCCAAT	AACMGGATTAGATACCCKG	ACGTCATCCCCACCTTCC	CACGCGAGTC	GCCAAT	L1	P06	B6	Nippobare	Root	TSB	1	Rice	WildType
L1P06B7	ACGACTACAGGCCAAT	AACMGGATTAGATACCCKG	ACGTCATCCCCACCTTCC	ACGACTACAG	GCCAAT	L1	P06	B7	Nippobare	Root	TSB	1	Rice	WildType
L1P06B8	CGTAGACTAGGCCAAT	AACMGGATTAGATACCCKG	ACGTCATCCCCACCTTCC	CGTAGACTAG	GCCAAT	L1	P06	B8	Nippobare	Root	TSB	1	Rice	WildType
L1P06B9	TACGAGTATGGCCAAT	AACMGGATTAGATACCCKG	ACGTCATCCCCACCTTCC	TACGAGTATG	GCCAAT	L1	P06	B9	Nippobare	Root	TSB	1	Rice	WildType
L1P06B10	TACTCTCGTGGCCAAT	AACMGGATTAGATACCCKG	ACGTCATCCCCACCTTCC	TACTCTCGTG	GCCAAT	L1	P06	B10	Nippobare	Root	TSB	1	Rice	WildType
L1P06B11	TAGAGACGAGGCCAAT	AACMGGATTAGATACCCKG	ACGTCATCCCCACCTTCC	TAGAGACGAG	GCCAAT	L1	P06	B11	Nippobare	Root	TSB	1	Rice	WildType
L1P06B12	TCGTCGCTCGGCCAAT	AACMGGATTAGATACCCKG	ACGTCATCCCCACCTTCC	TCGTCGCTCG	GCCAAT	L1	P06	B12	Nippobare	Root	TSB	1	Rice	WildType
L1P06C1	ACATACGCGTGCCAAT	AACMGGATTAGATACCCKG	ACGTCATCCCCACCTTCC	ACATACGCGT	GCCAAT	L1	P06	C1	Nippobare	Root	TSB	1	Rice	WildType
L1P06C2	ACGCGAGTATGCCAAT	AACMGGATTAGATACCCKG	ACGTCATCCCCACCTTCC	ACGCGAGTAT	GCCAAT	L1	P06	C2	Nippobare	Root	TSB	1	Rice	WildType
L1P06C3	ACTACTATGTGCCAAT	AACMGGATTAGATACCCKG	ACGTCATCCCCACCTTCC	ACTACTATGT	GCCAAT	L1	P06	C3	Nippobare	Root	TSB	1	Rice	WildType
L1P06C4	ACTGTACAGTGCCAAT	AACMGGATTAGATACCCKG	ACGTCATCCCCACCTTCC	ACTGTACAGT	GCCAAT	L1	P06	C4	Nippobare	Root	TSB	1	Rice	WildType
L1P06C5	AGACTATACTGCCAAT	AACMGGATTAGATACCCKG	ACGTCATCCCCACCTTCC	AGACTATACT	GCCAAT	L1	P06	C5	Nippobare	Root	TSB	1	Rice	WildType
L1P06C6	AGCGTCGTCTGCCAAT	AACMGGATTAGATACCCKG	ACGTCATCCCCACCTTCC	AGCGTCGTCT	GCCAAT	L1	P06	C6	Nippobare	Root	TSB	1	Rice	WildType
L1P06C7	AGTACGCTATGCCAAT	AACMGGATTAGATACCCKG	ACGTCATCCCCACCTTCC	AGTACGCTAT	GCCAAT	L1	P06	C7	Nippobare	Root	TSB	1	Rice	WildType
L1P06C8	CACGCTACGAGCCAAT	AACMGGATTAGATACCCKG	ACGTCATCCCCACCTTCC	CACGCTACGA	GCCAAT	L1	P06	C8	Nippobare	Root	TSB	1	Rice	WildType
L1P06C9	CACGCTACGTGCCAAT	AACMGGATTAGATACCCKG	ACGTCATCCCCACCTTCC	CACGCTACGT	GCCAAT	L1	P06	C9	Nippobare	Root	TSB	1	Rice	WildType
L1P06C10	CAGTAGACGTGCCAAT	AACMGGATTAGATACCCKG	ACGTCATCCCCACCTTCC	CAGTAGACGT	GCCAAT	L1	P06	C10	Nippobare	Root	TSB	1	Rice	WildType
L1P06C11	CGACGTGACTGCCAAT	AACMGGATTAGATACCCKG	ACGTCATCCCCACCTTCC	CGACGTGACT	GCCAAT	L1	P06	C11	Nippobare	Root	TSB	1	Rice	WildType
L1P06C12	CAGTCTCTAGGCCAAT	AACMGGATTAGATACCCKG	ACGTCATCCCCACCTTCC	CAGTCTCTAG	GCCAAT	L1	P06	C12	Nippobare	Root	TSB	1	Rice	WildType
L1P06D1	TACACGTGATGCCAAT	AACMGGATTAGATACCCKG	ACGTCATCCCCACCTTCC	TACACGTGAT	GCCAAT	L1	P06	D1	Nippobare	Root	TSB	1	Rice	WildType
L1P06D2	TACAGATCGTGCCAAT	AACMGGATTAGATACCCKG	ACGTCATCCCCACCTTCC	TACAGATCGT	GCCAAT	L1	P06	D2	Nippobare	Root	TSB	1	Rice	WildType
L1P06D3	TACGCTGTCTGCCAAT	AACMGGATTAGATACCCKG	ACGTCATCCCCACCTTCC	TACGCTGTCT	GCCAAT	L1	P06	D3	Nippobare	Root	TSB	1	Rice	WildType
L1P06D4	TAGTGTAGATGCCAAT	AACMGGATTAGATACCCKG	ACGTCATCCCCACCTTCC	TAGTGTAGAT	GCCAAT	L1	P06	D4	Nippobare	Root	TSB	1	Rice	WildType
L1P06D5	TCGATCACGTGCCAAT	AACMGGATTAGATACCCKG	ACGTCATCCCCACCTTCC	TCGATCACGT	GCCAAT	L1	P06	D5	Nippobare	Root	TSB	1	Rice	WildType
L1P06D6	TCGCACTAGTGCCAAT	AACMGGATTAGATACCCKG	ACGTCATCCCCACCTTCC	TCGCACTAGT	GCCAAT	L1	P06	D6	Nippobare	Root	TSB	1	Rice	WildType
L1P06D7	TCTAGCGACTGCCAAT	AACMGGATTAGATACCCKG	ACGTCATCCCCACCTTCC	TCTAGCGACT	GCCAAT	L1	P06	D7	Nippobare	Root	TSB	1	Rice	WildType
L1P06D8	CACGTGTATAGCCAAT	AACMGGATTAGATACCCKG	ACGTCATCCCCACCTTCC	CACGTGTATA	GCCAAT	L1	P06	D8	Nippobare	Root	TSB	1	Rice	WildType
L1P06D9	TGACGTATGTGCCAAT	AACMGGATTAGATACCCKG	ACGTCATCCCCACCTTCC	TGACGTATGT	GCCAAT	L1	P06	D9	Nippobare	Root	TSB	1	Rice	WildType
L1P06D10	CACTACGATGGCCAAT	AACMGGATTAGATACCCKG	ACGTCATCCCCACCTTCC	CACTACGATG	GCCAAT	L1	P06	D10	Nippobare	Root	TSB	1	Rice	WildType
L1P06D11	ACAGTATATAGCCAAT	AACMGGATTAGATACCCKG	ACGTCATCCCCACCTTCC	ACAGTATATA	GCCAAT	L1	P06	D11	Nippobare	Root	TSB	1	Rice	WildType
L1P06D12	ACGCGATCGAGCCAAT	AACMGGATTAGATACCCKG	ACGTCATCCCCACCTTCC	ACGCGATCGA	GCCAAT	L1	P06	D12	Nippobare	Root	TSB	1	Rice	WildType
L1P06E1	ACTAGCAGTAGCCAAT	AACMGGATTAGATACCCKG	ACGTCATCCCCACCTTCC	ACTAGCAGTA	GCCAAT	L1	P06	E1	Nippobare	Root	TSB	1	Rice	WildType
L1P06E2	AGCTCACGTAGCCAAT	AACMGGATTAGATACCCKG	ACGTCATCCCCACCTTCC	AGCTCACGTA	GCCAAT	L1	P06	E2	Nippobare	Root	TSB	1	Rice	WildType
L1P06E3	AGTATACATAGCCAAT	AACMGGATTAGATACCCKG	ACGTCATCCCCACCTTCC	AGTATACATA	GCCAAT	L1	P06	E3	Nippobare	Root	TSB	1	Rice	WildType
L1P06E4	AGTCGAGAGAGCCAAT	AACMGGATTAGATACCCKG	ACGTCATCCCCACCTTCC	AGTCGAGAGA	GCCAAT	L1	P06	E4	Nippobare	Root	TSB	1	Rice	WildType
L1P06E5	AGTGCTACGAGCCAAT	AACMGGATTAGATACCCKG	ACGTCATCCCCACCTTCC	AGTGCTACGA	GCCAAT	L1	P06	E5	Nippobare	Root	TSB	1	Rice	WildType
L1P06E6	CGATCGTATAGCCAAT	AACMGGATTAGATACCCKG	ACGTCATCCCCACCTTCC	CGATCGTATA	GCCAAT	L1	P06	E6	Nippobare	Root	TSB	1	Rice	WildType
L1P06E7	CGCAGTACGAGCCAAT	AACMGGATTAGATACCCKG	ACGTCATCCCCACCTTCC	CGCAGTACGA	GCCAAT	L1	P06	E7	Nippobare	Root	TSB	1	Rice	WildType
L1P06E8	CGCGTATACAGCCAAT	AACMGGATTAGATACCCKG	ACGTCATCCCCACCTTCC	CGCGTATACA	GCCAAT	L1	P06	E8	Nippobare	Root	TSB	1	Rice	WildType
L1P06E9	CGTACAGTCAGCCAAT	AACMGGATTAGATACCCKG	ACGTCATCCCCACCTTCC	CGTACAGTCA	GCCAAT	L1	P06	E9	Nippobare	Root	TSB	1	Rice	WildType
L1P06E10	CGTACTCAGAGCCAAT	AACMGGATTAGATACCCKG	ACGTCATCCCCACCTTCC	CGTACTCAGA	GCCAAT	L1	P06	E10	Nippobare	Root	TSB	1	Rice	WildType
L1P06E11	CTACGCTCTAGCCAAT	AACMGGATTAGATACCCKG	ACGTCATCCCCACCTTCC	CTACGCTCTA	GCCAAT	L1	P06	E11	Nippobare	Root	TSB	1	Rice	WildType
L1P06E12	CTATAGCGTAGCCAAT	AACMGGATTAGATACCCKG	ACGTCATCCCCACCTTCC	CTATAGCGTA	GCCAAT	L1	P06	E12	Nippobare	Root	TSB	1	Rice	WildType
L1P06F1	TACGTCATCAGCCAAT	AACMGGATTAGATACCCKG	ACGTCATCCCCACCTTCC	TACGTCATCA	GCCAAT	L1	P06	F1	Nippobare	Root	TSB	1	Rice	WildType
L1P06F2	TAGTCGCATAGCCAAT	AACMGGATTAGATACCCKG	ACGTCATCCCCACCTTCC	TAGTCGCATA	GCCAAT	L1	P06	F2	Nippobare	Root	TSB	1	Rice	WildType
L1P06F3	TATATATACAGCCAAT	AACMGGATTAGATACCCKG	ACGTCATCCCCACCTTCC	TATATATACA	GCCAAT	L1	P06	F3	Nippobare	Root	TSB	1	Rice	WildType
L1P06F4	TATGCTAGTAGCCAAT	AACMGGATTAGATACCCKG	ACGTCATCCCCACCTTCC	TATGCTAGTA	GCCAAT	L1	P06	F4	Nippobare	Root	TSB	1	Rice	WildType
L1P06F5	TCACGCGAGAGCCAAT	AACMGGATTAGATACCCKG	ACGTCATCCCCACCTTCC	TCACGCGAGA	GCCAAT	L1	P06	F5	Nippobare	Root	TSB	1	Rice	WildType
L1P06F6	TCGATAGTGAGCCAAT	AACMGGATTAGATACCCKG	ACGTCATCCCCACCTTCC	TCGATAGTGA	GCCAAT	L1	P06	F6	Nippobare	Root	TSB	1	Rice	WildType
L1P06F7	TCGCTGCGTAGCCAAT	AACMGGATTAGATACCCKG	ACGTCATCCCCACCTTCC	TCGCTGCGTA	GCCAAT	L1	P06	F7	Nippobare	Root	TSB	1	Rice	WildType
L1P06F8	TCTGACGTCAGCCAAT	AACMGGATTAGATACCCKG	ACGTCATCCCCACCTTCC	TCTGACGTCA	GCCAAT	L1	P06	F8	Nippobare	Root	TSB	1	Rice	WildType
L1P06F9	TGAGTCAGTAGCCAAT	AACMGGATTAGATACCCKG	ACGTCATCCCCACCTTCC	TGAGTCAGTA	GCCAAT	L1	P06	F9	Nippobare	Root	TSB	1	Rice	WildType
L1P06F10	CACTATACTCGCCAAT	AACMGGATTAGATACCCKG	ACGTCATCCCCACCTTCC	CACTATACTC	GCCAAT	L1	P06	F10	Nippobare	Root	TSB	1	Rice	WildType
L1P06F11	TGTCACACGAGCCAAT	AACMGGATTAGATACCCKG	ACGTCATCCCCACCTTCC	TGTCACACGA	GCCAAT	L1	P06	F11	Nippobare	Root	TSB	1	Rice	WildType
L1P06F12	TGTCGTCGCAGCCAAT	AACMGGATTAGATACCCKG	ACGTCATCCCCACCTTCC	TGTCGTCGCA	GCCAAT	L1	P06	F12	Nippobare	Root	TSB	1	Rice	WildType
L1P06G1	ACACATACGCGCCAAT	AACMGGATTAGATACCCKG	ACGTCATCCCCACCTTCC	ACACATACGC	GCCAAT	L1	P06	G1	Nippobare	Root	TSB	1	Rice	WildType
L1P06G2	ACAGTCGTGCGCCAAT	AACMGGATTAGATACCCKG	ACGTCATCCCCACCTTCC	ACAGTCGTGC	GCCAAT	L1	P06	G2	Nippobare	Root	TSB	1	Rice	WildType
L1P06G3	ACATGACGACGCCAAT	AACMGGATTAGATACCCKG	ACGTCATCCCCACCTTCC	ACATGACGAC	GCCAAT	L1	P06	G3	Nippobare	Root	TSB	1	Rice	WildType
L1P06G4	ACGACAGCTCGCCAAT	AACMGGATTAGATACCCKG	ACGTCATCCCCACCTTCC	ACGACAGCTC	GCCAAT	L1	P06	G4	Nippobare	Root	TSB	1	Rice	WildType
L1P06G5	ACGTCTCATCGCCAAT	AACMGGATTAGATACCCKG	ACGTCATCCCCACCTTCC	ACGTCTCATC	GCCAAT	L1	P06	G5	Nippobare	Root	TSB	1	Rice	WildType
L1P06G6	ACTCATCTACGCCAAT	AACMGGATTAGATACCCKG	ACGTCATCCCCACCTTCC	ACTCATCTAC	GCCAAT	L1	P06	G6	Nippobare	Root	TSB	1	Rice	WildType
L1P06G7	ACTCGCGCACGCCAAT	AACMGGATTAGATACCCKG	ACGTCATCCCCACCTTCC	ACTCGCGCAC	GCCAAT	L1	P06	G7	Nippobare	Root	TSB	1	Rice	WildType
L1P06G8	AGAGCGTCACGCCAAT	AACMGGATTAGATACCCKG	ACGTCATCCCCACCTTCC	AGAGCGTCAC	GCCAAT	L1	P06	G8	Nippobare	Root	TSB	1	Rice	WildType
L1P06G9	AGCGACTAGCGCCAAT	AACMGGATTAGATACCCKG	ACGTCATCCCCACCTTCC	AGCGACTAGC	GCCAAT	L1	P06	G9	Nippobare	Root	TSB	1	Rice	WildType
L1P06G10	CAGCGTACTGGCCAAT	AACMGGATTAGATACCCKG	ACGTCATCCCCACCTTCC	CAGCGTACTG	GCCAAT	L1	P06	G10	Nippobare	Root	TSB	1	Rice	WildType
L1P06G11	AGTGACACACGCCAAT	AACMGGATTAGATACCCKG	ACGTCATCCCCACCTTCC	AGTGACACAC	GCCAAT	L1	P06	G11	Nippobare	Root	TSB	1	Rice	WildType
L1P06G12	AGTGTATGTCGCCAAT	AACMGGATTAGATACCCKG	ACGTCATCCCCACCTTCC	AGTGTATGTC	GCCAAT	L1	P06	G12	Nippobare	Root	TSB	1	Rice	WildType
L1P06H1	ATAGATAGACGCCAAT	AACMGGATTAGATACCCKG	ACGTCATCCCCACCTTCC	ATAGATAGAC	GCCAAT	L1	P06	H1	Nippobare	Root	TSB	1	Rice	WildType
L1P06H2	ATATAGTCGCGCCAAT	AACMGGATTAGATACCCKG	ACGTCATCCCCACCTTCC	ATATAGTCGC	GCCAAT	L1	P06	H2	Nippobare	Root	TSB	1	Rice	WildType
L1P06H3	ATCTACTGACGCCAAT	AACMGGATTAGATACCCKG	ACGTCATCCCCACCTTCC	ATCTACTGAC	GCCAAT	L1	P06	H3	Nippobare	Root	TSB	1	Rice	WildType
L1P06H4	CACGTAGATCGCCAAT	AACMGGATTAGATACCCKG	ACGTCATCCCCACCTTCC	CACGTAGATC	GCCAAT	L1	P06	H4	Nippobare	Root	TSB	1	Rice	WildType
L1P06H5	CACGTCTCGCGCCAAT	AACMGGATTAGATACCCKG	ACGTCATCCCCACCTTCC	CACGTCTCGC	GCCAAT	L1	P06	H5	Nippobare	Root	TSB	1	Rice	WildType
L1P06H6	CATACTCTACGCCAAT	AACMGGATTAGATACCCKG	ACGTCATCCCCACCTTCC	CATACTCTAC	GCCAAT	L1	P06	H6	Nippobare	Root	TSB	1	Rice	WildType
L1P06H7	CGACACTATCGCCAAT	AACMGGATTAGATACCCKG	ACGTCATCCCCACCTTCC	CGACACTATC	GCCAAT	L1	P06	H7	Nippobare	Root	TSB	1	Rice	WildType
L1P06H8	CGAGACGCGCGCCAAT	AACMGGATTAGATACCCKG	ACGTCATCCCCACCTTCC	CGAGACGCGC	GCCAAT	L1	P06	H8	Nippobare	Root	TSB	1	Rice	WildType
L1P06H9	CGTATGCGACGCCAAT	AACMGGATTAGATACCCKG	ACGTCATCCCCACCTTCC	CGTATGCGAC	GCCAAT	L1	P06	H9	Nippobare	Root	TSB	1	Rice	WildType
L1P06H10	CGTCGATCTCGCCAAT	AACMGGATTAGATACCCKG	ACGTCATCCCCACCTTCC	CGTCGATCTC	GCCAAT	L1	P06	H10	Nippobare	Root	TSB	1	Rice	WildType
L1P06H11	CTACGACTGCGCCAAT	AACMGGATTAGATACCCKG	ACGTCATCCCCACCTTCC	CTACGACTGC	GCCAAT	L1	P06	H11	Nippobare	Root	TSB	1	Rice	WildType
L1P06H12	CTAGTCACTCGCCAAT	AACMGGATTAGATACCCKG	ACGTCATCCCCACCTTCC	CTAGTCACTC	GCCAAT	L1	P06	H12	Nippobare	Root	TSB	1	Rice	WildType
L1P07A1	ACGCTCGACACAGATC	AACMGGATTAGATACCCKG	ACGTCATCCCCACCTTCC	ACGCTCGACA	CAGATC	L1	P07	A1	Nippobare	Root	TSB	1	Rice	WildType
L1P07A2	AGACGCACTCCAGATC	AACMGGATTAGATACCCKG	ACGTCATCCCCACCTTCC	AGACGCACTC	CAGATC	L1	P07	A2	Nippobare	Root	TSB	1	Rice	WildType
L1P07A3	AGCACTGTAGCAGATC	AACMGGATTAGATACCCKG	ACGTCATCCCCACCTTCC	AGCACTGTAG	CAGATC	L1	P07	A3	Nippobare	Root	TSB	1	Rice	WildType
L1P07A4	ATCAGACACGCAGATC	AACMGGATTAGATACCCKG	ACGTCATCCCCACCTTCC	ATCAGACACG	CAGATC	L1	P07	A4	Nippobare	Root	TSB	1	Rice	WildType
L1P07A5	ATATCGCGAGCAGATC	AACMGGATTAGATACCCKG	ACGTCATCCCCACCTTCC	ATATCGCGAG	CAGATC	L1	P07	A5	Nippobare	Root	TSB	1	Rice	WildType
L1P07A6	CACGAGACAGCAGATC	AACMGGATTAGATACCCKG	ACGTCATCCCCACCTTCC	CACGAGACAG	CAGATC	L1	P07	A6	Nippobare	Root	TSB	1	Rice	WildType
L1P07A7	CTCGCGTGTCCAGATC	AACMGGATTAGATACCCKG	ACGTCATCCCCACCTTCC	CTCGCGTGTC	CAGATC	L1	P07	A7	Nippobare	Root	TSB	1	Rice	WildType
L1P07A8	TAGTATCAGCCAGATC	AACMGGATTAGATACCCKG	ACGTCATCCCCACCTTCC	TAGTATCAGC	CAGATC	L1	P07	A8	Nippobare	Root	TSB	1	Rice	WildType
L1P07A9	TCTCTATGCGCAGATC	AACMGGATTAGATACCCKG	ACGTCATCCCCACCTTCC	TCTCTATGCG	CAGATC	L1	P07	A9	Nippobare	Root	TSB	1	Rice	WildType
L1P07A10	TGATACGTCTCAGATC	AACMGGATTAGATACCCKG	ACGTCATCCCCACCTTCC	TGATACGTCT	CAGATC	L1	P07	A10	Nippobare	Root	TSB	1	Rice	WildType
L1P07A11	TACTGAGCTACAGATC	AACMGGATTAGATACCCKG	ACGTCATCCCCACCTTCC	TACTGAGCTA	CAGATC	L1	P07	A11	Nippobare	Root	TSB	1	Rice	WildType
L1P07A12	CATAGTAGTGCAGATC	AACMGGATTAGATACCCKG	ACGTCATCCCCACCTTCC	CATAGTAGTG	CAGATC	L1	P07	A12	Nippobare	Root	TSB	1	Rice	WildType
L1P07B1	CGAGAGATACCAGATC	AACMGGATTAGATACCCKG	ACGTCATCCCCACCTTCC	CGAGAGATAC	CAGATC	L1	P07	B1	Nippobare	Root	TSB	1	Rice	WildType
L1P07B2	ATACGACGTACAGATC	AACMGGATTAGATACCCKG	ACGTCATCCCCACCTTCC	ATACGACGTA	CAGATC	L1	P07	B2	Nippobare	Root	TSB	1	Rice	WildType
L1P07B3	TCACGTACTACAGATC	AACMGGATTAGATACCCKG	ACGTCATCCCCACCTTCC	TCACGTACTA	CAGATC	L1	P07	B3	Nippobare	Root	TSB	1	Rice	WildType
L1P07B4	CGTCTAGTACCAGATC	AACMGGATTAGATACCCKG	ACGTCATCCCCACCTTCC	CGTCTAGTAC	CAGATC	L1	P07	B4	Nippobare	Root	TSB	1	Rice	WildType
L1P07B5	TCTACGTAGCCAGATC	AACMGGATTAGATACCCKG	ACGTCATCCCCACCTTCC	TCTACGTAGC	CAGATC	L1	P07	B5	Nippobare	Root	TSB	1	Rice	WildType
L1P07B6	CACGCGAGTCCAGATC	AACMGGATTAGATACCCKG	ACGTCATCCCCACCTTCC	CACGCGAGTC	CAGATC	L1	P07	B6	Nippobare	Root	TSB	1	Rice	WildType
L1P07B7	ACGACTACAGCAGATC	AACMGGATTAGATACCCKG	ACGTCATCCCCACCTTCC	ACGACTACAG	CAGATC	L1	P07	B7	Nippobare	Root	TSB	1	Rice	WildType
L1P07B8	CGTAGACTAGCAGATC	AACMGGATTAGATACCCKG	ACGTCATCCCCACCTTCC	CGTAGACTAG	CAGATC	L1	P07	B8	Nippobare	Root	TSB	1	Rice	WildType
L1P07B9	TACGAGTATGCAGATC	AACMGGATTAGATACCCKG	ACGTCATCCCCACCTTCC	TACGAGTATG	CAGATC	L1	P07	B9	Nippobare	Root	TSB	1	Rice	WildType
L1P07B10	TACTCTCGTGCAGATC	AACMGGATTAGATACCCKG	ACGTCATCCCCACCTTCC	TACTCTCGTG	CAGATC	L1	P07	B10	Nippobare	Root	TSB	1	Rice	WildType
L1P07B11	TAGAGACGAGCAGATC	AACMGGATTAGATACCCKG	ACGTCATCCCCACCTTCC	TAGAGACGAG	CAGATC	L1	P07	B11	Nippobare	Root	TSB	1	Rice	WildType
L1P07B12	TCGTCGCTCGCAGATC	AACMGGATTAGATACCCKG	ACGTCATCCCCACCTTCC	TCGTCGCTCG	CAGATC	L1	P07	B12	Nippobare	Root	TSB	1	Rice	WildType
L1P07C1	ACATACGCGTCAGATC	AACMGGATTAGATACCCKG	ACGTCATCCCCACCTTCC	ACATACGCGT	CAGATC	L1	P07	C1	Nippobare	Root	TSB	1	Rice	WildType
L1P07C2	ACGCGAGTATCAGATC	AACMGGATTAGATACCCKG	ACGTCATCCCCACCTTCC	ACGCGAGTAT	CAGATC	L1	P07	C2	Nippobare	Root	TSB	1	Rice	WildType
L1P07C3	ACTACTATGTCAGATC	AACMGGATTAGATACCCKG	ACGTCATCCCCACCTTCC	ACTACTATGT	CAGATC	L1	P07	C3	Nippobare	Root	TSB	1	Rice	WildType
L1P07C4	ACTGTACAGTCAGATC	AACMGGATTAGATACCCKG	ACGTCATCCCCACCTTCC	ACTGTACAGT	CAGATC	L1	P07	C4	Nippobare	Root	TSB	1	Rice	WildType
L1P07C5	AGACTATACTCAGATC	AACMGGATTAGATACCCKG	ACGTCATCCCCACCTTCC	AGACTATACT	CAGATC	L1	P07	C5	Nippobare	Root	TSB	1	Rice	WildType
L1P07C6	AGCGTCGTCTCAGATC	AACMGGATTAGATACCCKG	ACGTCATCCCCACCTTCC	AGCGTCGTCT	CAGATC	L1	P07	C6	Nippobare	Root	TSB	1	Rice	WildType
L1P07C7	AGTACGCTATCAGATC	AACMGGATTAGATACCCKG	ACGTCATCCCCACCTTCC	AGTACGCTAT	CAGATC	L1	P07	C7	Nippobare	Root	TSB	1	Rice	WildType
L1P07C8	CACGCTACGACAGATC	AACMGGATTAGATACCCKG	ACGTCATCCCCACCTTCC	CACGCTACGA	CAGATC	L1	P07	C8	Nippobare	Root	TSB	1	Rice	WildType
L1P07C9	CACGCTACGTCAGATC	AACMGGATTAGATACCCKG	ACGTCATCCCCACCTTCC	CACGCTACGT	CAGATC	L1	P07	C9	Nippobare	Root	TSB	1	Rice	WildType
L1P07C10	CAGTAGACGTCAGATC	AACMGGATTAGATACCCKG	ACGTCATCCCCACCTTCC	CAGTAGACGT	CAGATC	L1	P07	C10	Nippobare	Root	TSB	1	Rice	WildType
L1P07C11	CGACGTGACTCAGATC	AACMGGATTAGATACCCKG	ACGTCATCCCCACCTTCC	CGACGTGACT	CAGATC	L1	P07	C11	Nippobare	Root	TSB	1	Rice	WildType
L1P07C12	CAGTCTCTAGCAGATC	AACMGGATTAGATACCCKG	ACGTCATCCCCACCTTCC	CAGTCTCTAG	CAGATC	L1	P07	C12	Nippobare	Root	TSB	1	Rice	WildType
L1P07D1	TACACGTGATCAGATC	AACMGGATTAGATACCCKG	ACGTCATCCCCACCTTCC	TACACGTGAT	CAGATC	L1	P07	D1	Nippobare	Root	TSB	1	Rice	WildType
L1P07D2	TACAGATCGTCAGATC	AACMGGATTAGATACCCKG	ACGTCATCCCCACCTTCC	TACAGATCGT	CAGATC	L1	P07	D2	Nippobare	Root	TSB	1	Rice	WildType
L1P07D3	TACGCTGTCTCAGATC	AACMGGATTAGATACCCKG	ACGTCATCCCCACCTTCC	TACGCTGTCT	CAGATC	L1	P07	D3	Nippobare	Root	TSB	1	Rice	WildType
L1P07D4	TAGTGTAGATCAGATC	AACMGGATTAGATACCCKG	ACGTCATCCCCACCTTCC	TAGTGTAGAT	CAGATC	L1	P07	D4	Nippobare	Root	TSB	1	Rice	WildType
L1P07D5	TCGATCACGTCAGATC	AACMGGATTAGATACCCKG	ACGTCATCCCCACCTTCC	TCGATCACGT	CAGATC	L1	P07	D5	Nippobare	Root	TSB	1	Rice	WildType
L1P07D6	TCGCACTAGTCAGATC	AACMGGATTAGATACCCKG	ACGTCATCCCCACCTTCC	TCGCACTAGT	CAGATC	L1	P07	D6	Nippobare	Root	TSB	1	Rice	WildType
L1P07D7	TCTAGCGACTCAGATC	AACMGGATTAGATACCCKG	ACGTCATCCCCACCTTCC	TCTAGCGACT	CAGATC	L1	P07	D7	Nippobare	Root	TSB	1	Rice	WildType
L1P07D8	CACGTGTATACAGATC	AACMGGATTAGATACCCKG	ACGTCATCCCCACCTTCC	CACGTGTATA	CAGATC	L1	P07	D8	Nippobare	Root	TSB	1	Rice	WildType
L1P07D9	TGACGTATGTCAGATC	AACMGGATTAGATACCCKG	ACGTCATCCCCACCTTCC	TGACGTATGT	CAGATC	L1	P07	D9	Nippobare	Root	TSB	1	Rice	WildType
L1P07D10	CACTACGATGCAGATC	AACMGGATTAGATACCCKG	ACGTCATCCCCACCTTCC	CACTACGATG	CAGATC	L1	P07	D10	Nippobare	Root	TSB	1	Rice	WildType
L1P07D11	ACAGTATATACAGATC	AACMGGATTAGATACCCKG	ACGTCATCCCCACCTTCC	ACAGTATATA	CAGATC	L1	P07	D11	Nippobare	Root	TSB	1	Rice	WildType
L1P07D12	ACGCGATCGACAGATC	AACMGGATTAGATACCCKG	ACGTCATCCCCACCTTCC	ACGCGATCGA	CAGATC	L1	P07	D12	Nippobare	Root	TSB	1	Rice	WildType
L1P07E1	ACTAGCAGTACAGATC	AACMGGATTAGATACCCKG	ACGTCATCCCCACCTTCC	ACTAGCAGTA	CAGATC	L1	P07	E1	Nippobare	Root	TSB	1	Rice	WildType
L1P07E2	AGCTCACGTACAGATC	AACMGGATTAGATACCCKG	ACGTCATCCCCACCTTCC	AGCTCACGTA	CAGATC	L1	P07	E2	Nippobare	Root	TSB	1	Rice	WildType
L1P07E3	AGTATACATACAGATC	AACMGGATTAGATACCCKG	ACGTCATCCCCACCTTCC	AGTATACATA	CAGATC	L1	P07	E3	Nippobare	Root	TSB	1	Rice	WildType
L1P07E4	AGTCGAGAGACAGATC	AACMGGATTAGATACCCKG	ACGTCATCCCCACCTTCC	AGTCGAGAGA	CAGATC	L1	P07	E4	Nippobare	Root	TSB	1	Rice	WildType
L1P07E5	AGTGCTACGACAGATC	AACMGGATTAGATACCCKG	ACGTCATCCCCACCTTCC	AGTGCTACGA	CAGATC	L1	P07	E5	Nippobare	Root	TSB	1	Rice	WildType
L1P07E6	CGATCGTATACAGATC	AACMGGATTAGATACCCKG	ACGTCATCCCCACCTTCC	CGATCGTATA	CAGATC	L1	P07	E6	Nippobare	Root	TSB	1	Rice	WildType
L1P07E7	CGCAGTACGACAGATC	AACMGGATTAGATACCCKG	ACGTCATCCCCACCTTCC	CGCAGTACGA	CAGATC	L1	P07	E7	Nippobare	Root	TSB	1	Rice	WildType
L1P07E8	CGCGTATACACAGATC	AACMGGATTAGATACCCKG	ACGTCATCCCCACCTTCC	CGCGTATACA	CAGATC	L1	P07	E8	Nippobare	Root	TSB	1	Rice	WildType
L1P07E9	CGTACAGTCACAGATC	AACMGGATTAGATACCCKG	ACGTCATCCCCACCTTCC	CGTACAGTCA	CAGATC	L1	P07	E9	Nippobare	Root	TSB	1	Rice	WildType
L1P07E10	CGTACTCAGACAGATC	AACMGGATTAGATACCCKG	ACGTCATCCCCACCTTCC	CGTACTCAGA	CAGATC	L1	P07	E10	Nippobare	Root	TSB	1	Rice	WildType
L1P07E11	CTACGCTCTACAGATC	AACMGGATTAGATACCCKG	ACGTCATCCCCACCTTCC	CTACGCTCTA	CAGATC	L1	P07	E11	Nippobare	Root	TSB	1	Rice	WildType
L1P07E12	CTATAGCGTACAGATC	AACMGGATTAGATACCCKG	ACGTCATCCCCACCTTCC	CTATAGCGTA	CAGATC	L1	P07	E12	Nippobare	Root	TSB	1	Rice	WildType
L1P07F1	TACGTCATCACAGATC	AACMGGATTAGATACCCKG	ACGTCATCCCCACCTTCC	TACGTCATCA	CAGATC	L1	P07	F1	Nippobare	Root	TSB	1	Rice	WildType
L1P07F2	TAGTCGCATACAGATC	AACMGGATTAGATACCCKG	ACGTCATCCCCACCTTCC	TAGTCGCATA	CAGATC	L1	P07	F2	Nippobare	Root	TSB	1	Rice	WildType
L1P07F3	TATATATACACAGATC	AACMGGATTAGATACCCKG	ACGTCATCCCCACCTTCC	TATATATACA	CAGATC	L1	P07	F3	Nippobare	Root	TSB	1	Rice	WildType
L1P07F4	TATGCTAGTACAGATC	AACMGGATTAGATACCCKG	ACGTCATCCCCACCTTCC	TATGCTAGTA	CAGATC	L1	P07	F4	Nippobare	Root	TSB	1	Rice	WildType
L1P07F5	TCACGCGAGACAGATC	AACMGGATTAGATACCCKG	ACGTCATCCCCACCTTCC	TCACGCGAGA	CAGATC	L1	P07	F5	Nippobare	Root	TSB	1	Rice	WildType
L1P07F6	TCGATAGTGACAGATC	AACMGGATTAGATACCCKG	ACGTCATCCCCACCTTCC	TCGATAGTGA	CAGATC	L1	P07	F6	Nippobare	Root	TSB	1	Rice	WildType
L1P07F7	TCGCTGCGTACAGATC	AACMGGATTAGATACCCKG	ACGTCATCCCCACCTTCC	TCGCTGCGTA	CAGATC	L1	P07	F7	Nippobare	Root	TSB	1	Rice	WildType
L1P07F8	TCTGACGTCACAGATC	AACMGGATTAGATACCCKG	ACGTCATCCCCACCTTCC	TCTGACGTCA	CAGATC	L1	P07	F8	Nippobare	Root	TSB	1	Rice	WildType
L1P07F9	TGAGTCAGTACAGATC	AACMGGATTAGATACCCKG	ACGTCATCCCCACCTTCC	TGAGTCAGTA	CAGATC	L1	P07	F9	Nippobare	Root	TSB	1	Rice	WildType
L1P07F10	CACTATACTCCAGATC	AACMGGATTAGATACCCKG	ACGTCATCCCCACCTTCC	CACTATACTC	CAGATC	L1	P07	F10	Nippobare	Root	TSB	1	Rice	WildType
L1P07F11	TGTCACACGACAGATC	AACMGGATTAGATACCCKG	ACGTCATCCCCACCTTCC	TGTCACACGA	CAGATC	L1	P07	F11	Nippobare	Root	TSB	1	Rice	WildType
L1P07F12	TGTCGTCGCACAGATC	AACMGGATTAGATACCCKG	ACGTCATCCCCACCTTCC	TGTCGTCGCA	CAGATC	L1	P07	F12	Nippobare	Root	TSB	1	Rice	WildType
L1P07G1	ACACATACGCCAGATC	AACMGGATTAGATACCCKG	ACGTCATCCCCACCTTCC	ACACATACGC	CAGATC	L1	P07	G1	Nippobare	Root	TSB	1	Rice	WildType
L1P07G2	ACAGTCGTGCCAGATC	AACMGGATTAGATACCCKG	ACGTCATCCCCACCTTCC	ACAGTCGTGC	CAGATC	L1	P07	G2	Nippobare	Root	TSB	1	Rice	WildType
L1P07G3	ACATGACGACCAGATC	AACMGGATTAGATACCCKG	ACGTCATCCCCACCTTCC	ACATGACGAC	CAGATC	L1	P07	G3	Nippobare	Root	TSB	1	Rice	WildType
L1P07G4	ACGACAGCTCCAGATC	AACMGGATTAGATACCCKG	ACGTCATCCCCACCTTCC	ACGACAGCTC	CAGATC	L1	P07	G4	Nippobare	Root	TSB	1	Rice	WildType
L1P07G5	ACGTCTCATCCAGATC	AACMGGATTAGATACCCKG	ACGTCATCCCCACCTTCC	ACGTCTCATC	CAGATC	L1	P07	G5	Nippobare	Root	TSB	1	Rice	WildType
L1P07G6	ACTCATCTACCAGATC	AACMGGATTAGATACCCKG	ACGTCATCCCCACCTTCC	ACTCATCTAC	CAGATC	L1	P07	G6	Nippobare	Root	TSB	1	Rice	WildType
L1P07G7	ACTCGCGCACCAGATC	AACMGGATTAGATACCCKG	ACGTCATCCCCACCTTCC	ACTCGCGCAC	CAGATC	L1	P07	G7	Nippobare	Root	TSB	1	Rice	WildType
L1P07G8	AGAGCGTCACCAGATC	AACMGGATTAGATACCCKG	ACGTCATCCCCACCTTCC	AGAGCGTCAC	CAGATC	L1	P07	G8	Nippobare	Root	TSB	1	Rice	WildType
L1P07G9	AGCGACTAGCCAGATC	AACMGGATTAGATACCCKG	ACGTCATCCCCACCTTCC	AGCGACTAGC	CAGATC	L1	P07	G9	Nippobare	Root	TSB	1	Rice	WildType
L1P07G10	CAGCGTACTGCAGATC	AACMGGATTAGATACCCKG	ACGTCATCCCCACCTTCC	CAGCGTACTG	CAGATC	L1	P07	G10	Nippobare	Root	TSB	1	Rice	WildType
L1P07G11	AGTGACACACCAGATC	AACMGGATTAGATACCCKG	ACGTCATCCCCACCTTCC	AGTGACACAC	CAGATC	L1	P07	G11	Nippobare	Root	TSB	1	Rice	WildType
L1P07G12	AGTGTATGTCCAGATC	AACMGGATTAGATACCCKG	ACGTCATCCCCACCTTCC	AGTGTATGTC	CAGATC	L1	P07	G12	Nippobare	Root	TSB	1	Rice	WildType
L1P07H1	ATAGATAGACCAGATC	AACMGGATTAGATACCCKG	ACGTCATCCCCACCTTCC	ATAGATAGAC	CAGATC	L1	P07	H1	Nippobare	Root	TSB	1	Rice	WildType
L1P07H2	ATATAGTCGCCAGATC	AACMGGATTAGATACCCKG	ACGTCATCCCCACCTTCC	ATATAGTCGC	CAGATC	L1	P07	H2	Nippobare	Root	TSB	1	Rice	WildType
L1P07H3	ATCTACTGACCAGATC	AACMGGATTAGATACCCKG	ACGTCATCCCCACCTTCC	ATCTACTGAC	CAGATC	L1	P07	H3	Nippobare	Root	TSB	1	Rice	WildType
L1P07H4	CACGTAGATCCAGATC	AACMGGATTAGATACCCKG	ACGTCATCCCCACCTTCC	CACGTAGATC	CAGATC	L1	P07	H4	Nippobare	Root	TSB	1	Rice	WildType
L1P07H5	CACGTCTCGCCAGATC	AACMGGATTAGATACCCKG	ACGTCATCCCCACCTTCC	CACGTCTCGC	CAGATC	L1	P07	H5	Nippobare	Root	TSB	1	Rice	WildType
L1P07H6	CATACTCTACCAGATC	AACMGGATTAGATACCCKG	ACGTCATCCCCACCTTCC	CATACTCTAC	CAGATC	L1	P07	H6	Nippobare	Root	TSB	1	Rice	WildType
L1P07H7	CGACACTATCCAGATC	AACMGGATTAGATACCCKG	ACGTCATCCCCACCTTCC	CGACACTATC	CAGATC	L1	P07	H7	Nippobare	Root	TSB	1	Rice	WildType
L1P07H8	CGAGACGCGCCAGATC	AACMGGATTAGATACCCKG	ACGTCATCCCCACCTTCC	CGAGACGCGC	CAGATC	L1	P07	H8	Nippobare	Root	TSB	1	Rice	WildType
L1P07H9	CGTATGCGACCAGATC	AACMGGATTAGATACCCKG	ACGTCATCCCCACCTTCC	CGTATGCGAC	CAGATC	L1	P07	H9	Nippobare	Root	TSB	1	Rice	WildType
L1P07H10	CGTCGATCTCCAGATC	AACMGGATTAGATACCCKG	ACGTCATCCCCACCTTCC	CGTCGATCTC	CAGATC	L1	P07	H10	Nippobare	Root	TSB	1	Rice	WildType
L1P07H11	CTACGACTGCCAGATC	AACMGGATTAGATACCCKG	ACGTCATCCCCACCTTCC	CTACGACTGC	CAGATC	L1	P07	H11	Nippobare	Root	TSB	1	Rice	WildType
L1P07H12	CTAGTCACTCCAGATC	AACMGGATTAGATACCCKG	ACGTCATCCCCACCTTCC	CTAGTCACTC	CAGATC	L1	P07	H12	Nippobare	Root	TSB	1	Rice	WildType
L1P08A1	ACGCTCGACAACTTGA	AACMGGATTAGATACCCKG	ACGTCATCCCCACCTTCC	ACGCTCGACA	ACTTGA	L1	P08	A1	Nippobare	Root	TSB	1	Rice	WildType
L1P08A2	AGACGCACTCACTTGA	AACMGGATTAGATACCCKG	ACGTCATCCCCACCTTCC	AGACGCACTC	ACTTGA	L1	P08	A2	Nippobare	Root	TSB	1	Rice	WildType
L1P08A3	AGCACTGTAGACTTGA	AACMGGATTAGATACCCKG	ACGTCATCCCCACCTTCC	AGCACTGTAG	ACTTGA	L1	P08	A3	Nippobare	Root	TSB	1	Rice	WildType
L1P08A4	ATCAGACACGACTTGA	AACMGGATTAGATACCCKG	ACGTCATCCCCACCTTCC	ATCAGACACG	ACTTGA	L1	P08	A4	Nippobare	Root	TSB	1	Rice	WildType
L1P08A5	ATATCGCGAGACTTGA	AACMGGATTAGATACCCKG	ACGTCATCCCCACCTTCC	ATATCGCGAG	ACTTGA	L1	P08	A5	Nippobare	Root	TSB	1	Rice	WildType
L1P08A6	CACGAGACAGACTTGA	AACMGGATTAGATACCCKG	ACGTCATCCCCACCTTCC	CACGAGACAG	ACTTGA	L1	P08	A6	Nippobare	Root	TSB	1	Rice	WildType
L1P08A7	CTCGCGTGTCACTTGA	AACMGGATTAGATACCCKG	ACGTCATCCCCACCTTCC	CTCGCGTGTC	ACTTGA	L1	P08	A7	Nippobare	Root	TSB	1	Rice	WildType
L1P08A8	TAGTATCAGCACTTGA	AACMGGATTAGATACCCKG	ACGTCATCCCCACCTTCC	TAGTATCAGC	ACTTGA	L1	P08	A8	Nippobare	Root	TSB	1	Rice	WildType
L1P08A9	TCTCTATGCGACTTGA	AACMGGATTAGATACCCKG	ACGTCATCCCCACCTTCC	TCTCTATGCG	ACTTGA	L1	P08	A9	Nippobare	Root	TSB	1	Rice	WildType
L1P08A10	TGATACGTCTACTTGA	AACMGGATTAGATACCCKG	ACGTCATCCCCACCTTCC	TGATACGTCT	ACTTGA	L1	P08	A10	Nippobare	Root	TSB	1	Rice	WildType
L1P08A11	TACTGAGCTAACTTGA	AACMGGATTAGATACCCKG	ACGTCATCCCCACCTTCC	TACTGAGCTA	ACTTGA	L1	P08	A11	Nippobare	Root	TSB	1	Rice	WildType
L1P08A12	CATAGTAGTGACTTGA	AACMGGATTAGATACCCKG	ACGTCATCCCCACCTTCC	CATAGTAGTG	ACTTGA	L1	P08	A12	Nippobare	Root	TSB	1	Rice	WildType
L1P08B1	CGAGAGATACACTTGA	AACMGGATTAGATACCCKG	ACGTCATCCCCACCTTCC	CGAGAGATAC	ACTTGA	L1	P08	B1	Nippobare	Root	TSB	1	Rice	WildType
L1P08B2	ATACGACGTAACTTGA	AACMGGATTAGATACCCKG	ACGTCATCCCCACCTTCC	ATACGACGTA	ACTTGA	L1	P08	B2	Nippobare	Root	TSB	1	Rice	WildType
L1P08B3	TCACGTACTAACTTGA	AACMGGATTAGATACCCKG	ACGTCATCCCCACCTTCC	TCACGTACTA	ACTTGA	L1	P08	B3	Nippobare	Root	TSB	1	Rice	WildType
L1P08B4	CGTCTAGTACACTTGA	AACMGGATTAGATACCCKG	ACGTCATCCCCACCTTCC	CGTCTAGTAC	ACTTGA	L1	P08	B4	Nippobare	Root	TSB	1	Rice	WildType
L1P08B5	TCTACGTAGCACTTGA	AACMGGATTAGATACCCKG	ACGTCATCCCCACCTTCC	TCTACGTAGC	ACTTGA	L1	P08	B5	Nippobare	Root	TSB	1	Rice	WildType
L1P08B6	CACGCGAGTCACTTGA	AACMGGATTAGATACCCKG	ACGTCATCCCCACCTTCC	CACGCGAGTC	ACTTGA	L1	P08	B6	Nippobare	Root	TSB	1	Rice	WildType
L1P08B7	ACGACTACAGACTTGA	AACMGGATTAGATACCCKG	ACGTCATCCCCACCTTCC	ACGACTACAG	ACTTGA	L1	P08	B7	Nippobare	Root	TSB	1	Rice	WildType
L1P08B8	CGTAGACTAGACTTGA	AACMGGATTAGATACCCKG	ACGTCATCCCCACCTTCC	CGTAGACTAG	ACTTGA	L1	P08	B8	Nippobare	Root	TSB	1	Rice	WildType
L1P08B9	TACGAGTATGACTTGA	AACMGGATTAGATACCCKG	ACGTCATCCCCACCTTCC	TACGAGTATG	ACTTGA	L1	P08	B9	Nippobare	Root	TSB	1	Rice	WildType
L1P08B10	TACTCTCGTGACTTGA	AACMGGATTAGATACCCKG	ACGTCATCCCCACCTTCC	TACTCTCGTG	ACTTGA	L1	P08	B10	Nippobare	Root	TSB	1	Rice	WildType
L1P08B11	TAGAGACGAGACTTGA	AACMGGATTAGATACCCKG	ACGTCATCCCCACCTTCC	TAGAGACGAG	ACTTGA	L1	P08	B11	Nippobare	Root	TSB	1	Rice	WildType
L1P08B12	TCGTCGCTCGACTTGA	AACMGGATTAGATACCCKG	ACGTCATCCCCACCTTCC	TCGTCGCTCG	ACTTGA	L1	P08	B12	Nippobare	Root	TSB	1	Rice	WildType
L1P08C1	ACATACGCGTACTTGA	AACMGGATTAGATACCCKG	ACGTCATCCCCACCTTCC	ACATACGCGT	ACTTGA	L1	P08	C1	Nippobare	Root	TSB	1	Rice	WildType
L1P08C2	ACGCGAGTATACTTGA	AACMGGATTAGATACCCKG	ACGTCATCCCCACCTTCC	ACGCGAGTAT	ACTTGA	L1	P08	C2	Nippobare	Root	TSB	1	Rice	WildType
L1P08C3	ACTACTATGTACTTGA	AACMGGATTAGATACCCKG	ACGTCATCCCCACCTTCC	ACTACTATGT	ACTTGA	L1	P08	C3	Nippobare	Root	TSB	1	Rice	WildType
L1P08C4	ACTGTACAGTACTTGA	AACMGGATTAGATACCCKG	ACGTCATCCCCACCTTCC	ACTGTACAGT	ACTTGA	L1	P08	C4	Nippobare	Root	TSB	1	Rice	WildType
L1P08C5	AGACTATACTACTTGA	AACMGGATTAGATACCCKG	ACGTCATCCCCACCTTCC	AGACTATACT	ACTTGA	L1	P08	C5	Nippobare	Root	TSB	1	Rice	WildType
L1P08C6	AGCGTCGTCTACTTGA	AACMGGATTAGATACCCKG	ACGTCATCCCCACCTTCC	AGCGTCGTCT	ACTTGA	L1	P08	C6	Nippobare	Root	TSB	1	Rice	WildType
L1P08C7	AGTACGCTATACTTGA	AACMGGATTAGATACCCKG	ACGTCATCCCCACCTTCC	AGTACGCTAT	ACTTGA	L1	P08	C7	Nippobare	Root	TSB	1	Rice	WildType
L1P08C8	CACGCTACGAACTTGA	AACMGGATTAGATACCCKG	ACGTCATCCCCACCTTCC	CACGCTACGA	ACTTGA	L1	P08	C8	Nippobare	Root	TSB	1	Rice	WildType
L1P08C9	CACGCTACGTACTTGA	AACMGGATTAGATACCCKG	ACGTCATCCCCACCTTCC	CACGCTACGT	ACTTGA	L1	P08	C9	Nippobare	Root	TSB	1	Rice	WildType
L1P08C10	CAGTAGACGTACTTGA	AACMGGATTAGATACCCKG	ACGTCATCCCCACCTTCC	CAGTAGACGT	ACTTGA	L1	P08	C10	Nippobare	Root	TSB	1	Rice	WildType
L1P08C11	CGACGTGACTACTTGA	AACMGGATTAGATACCCKG	ACGTCATCCCCACCTTCC	CGACGTGACT	ACTTGA	L1	P08	C11	Nippobare	Root	TSB	1	Rice	WildType
L1P08C12	CAGTCTCTAGACTTGA	AACMGGATTAGATACCCKG	ACGTCATCCCCACCTTCC	CAGTCTCTAG	ACTTGA	L1	P08	C12	Nippobare	Root	TSB	1	Rice	WildType
L1P08D1	TACACGTGATACTTGA	AACMGGATTAGATACCCKG	ACGTCATCCCCACCTTCC	TACACGTGAT	ACTTGA	L1	P08	D1	Nippobare	Root	TSB	1	Rice	WildType
L1P08D2	TACAGATCGTACTTGA	AACMGGATTAGATACCCKG	ACGTCATCCCCACCTTCC	TACAGATCGT	ACTTGA	L1	P08	D2	Nippobare	Root	TSB	1	Rice	WildType
L1P08D3	TACGCTGTCTACTTGA	AACMGGATTAGATACCCKG	ACGTCATCCCCACCTTCC	TACGCTGTCT	ACTTGA	L1	P08	D3	Nippobare	Root	TSB	1	Rice	WildType
L1P08D4	TAGTGTAGATACTTGA	AACMGGATTAGATACCCKG	ACGTCATCCCCACCTTCC	TAGTGTAGAT	ACTTGA	L1	P08	D4	Nippobare	Root	TSB	1	Rice	WildType
L1P08D5	TCGATCACGTACTTGA	AACMGGATTAGATACCCKG	ACGTCATCCCCACCTTCC	TCGATCACGT	ACTTGA	L1	P08	D5	Nippobare	Root	TSB	1	Rice	WildType
L1P08D6	TCGCACTAGTACTTGA	AACMGGATTAGATACCCKG	ACGTCATCCCCACCTTCC	TCGCACTAGT	ACTTGA	L1	P08	D6	Nippobare	Root	TSB	1	Rice	WildType
L1P08D7	TCTAGCGACTACTTGA	AACMGGATTAGATACCCKG	ACGTCATCCCCACCTTCC	TCTAGCGACT	ACTTGA	L1	P08	D7	Nippobare	Root	TSB	1	Rice	WildType
L1P08D8	CACGTGTATAACTTGA	AACMGGATTAGATACCCKG	ACGTCATCCCCACCTTCC	CACGTGTATA	ACTTGA	L1	P08	D8	Nippobare	Root	TSB	1	Rice	WildType
L1P08D9	TGACGTATGTACTTGA	AACMGGATTAGATACCCKG	ACGTCATCCCCACCTTCC	TGACGTATGT	ACTTGA	L1	P08	D9	Nippobare	Root	TSB	1	Rice	WildType
L1P08D10	CACTACGATGACTTGA	AACMGGATTAGATACCCKG	ACGTCATCCCCACCTTCC	CACTACGATG	ACTTGA	L1	P08	D10	Nippobare	Root	TSB	1	Rice	WildType
L1P08D11	ACAGTATATAACTTGA	AACMGGATTAGATACCCKG	ACGTCATCCCCACCTTCC	ACAGTATATA	ACTTGA	L1	P08	D11	Nippobare	Root	TSB	1	Rice	WildType
L1P08D12	ACGCGATCGAACTTGA	AACMGGATTAGATACCCKG	ACGTCATCCCCACCTTCC	ACGCGATCGA	ACTTGA	L1	P08	D12	Nippobare	Root	TSB	1	Rice	WildType
L1P08E1	ACTAGCAGTAACTTGA	AACMGGATTAGATACCCKG	ACGTCATCCCCACCTTCC	ACTAGCAGTA	ACTTGA	L1	P08	E1	Nippobare	Root	TSB	1	Rice	WildType
L1P08E2	AGCTCACGTAACTTGA	AACMGGATTAGATACCCKG	ACGTCATCCCCACCTTCC	AGCTCACGTA	ACTTGA	L1	P08	E2	Nippobare	Root	TSB	1	Rice	WildType
L1P08E3	AGTATACATAACTTGA	AACMGGATTAGATACCCKG	ACGTCATCCCCACCTTCC	AGTATACATA	ACTTGA	L1	P08	E3	Nippobare	Root	TSB	1	Rice	WildType
L1P08E4	AGTCGAGAGAACTTGA	AACMGGATTAGATACCCKG	ACGTCATCCCCACCTTCC	AGTCGAGAGA	ACTTGA	L1	P08	E4	Nippobare	Root	TSB	1	Rice	WildType
L1P08E5	AGTGCTACGAACTTGA	AACMGGATTAGATACCCKG	ACGTCATCCCCACCTTCC	AGTGCTACGA	ACTTGA	L1	P08	E5	Nippobare	Root	TSB	1	Rice	WildType
L1P08E6	CGATCGTATAACTTGA	AACMGGATTAGATACCCKG	ACGTCATCCCCACCTTCC	CGATCGTATA	ACTTGA	L1	P08	E6	Nippobare	Root	TSB	1	Rice	WildType
L1P08E7	CGCAGTACGAACTTGA	AACMGGATTAGATACCCKG	ACGTCATCCCCACCTTCC	CGCAGTACGA	ACTTGA	L1	P08	E7	Nippobare	Root	TSB	1	Rice	WildType
L1P08E8	CGCGTATACAACTTGA	AACMGGATTAGATACCCKG	ACGTCATCCCCACCTTCC	CGCGTATACA	ACTTGA	L1	P08	E8	Nippobare	Root	TSB	1	Rice	WildType
L1P08E9	CGTACAGTCAACTTGA	AACMGGATTAGATACCCKG	ACGTCATCCCCACCTTCC	CGTACAGTCA	ACTTGA	L1	P08	E9	Nippobare	Root	TSB	1	Rice	WildType
L1P08E10	CGTACTCAGAACTTGA	AACMGGATTAGATACCCKG	ACGTCATCCCCACCTTCC	CGTACTCAGA	ACTTGA	L1	P08	E10	Nippobare	Root	TSB	1	Rice	WildType
L1P08E11	CTACGCTCTAACTTGA	AACMGGATTAGATACCCKG	ACGTCATCCCCACCTTCC	CTACGCTCTA	ACTTGA	L1	P08	E11	Nippobare	Root	TSB	1	Rice	WildType
L1P08E12	CTATAGCGTAACTTGA	AACMGGATTAGATACCCKG	ACGTCATCCCCACCTTCC	CTATAGCGTA	ACTTGA	L1	P08	E12	Nippobare	Root	TSB	1	Rice	WildType
L1P08F1	TACGTCATCAACTTGA	AACMGGATTAGATACCCKG	ACGTCATCCCCACCTTCC	TACGTCATCA	ACTTGA	L1	P08	F1	Nippobare	Root	TSB	1	Rice	WildType
L1P08F2	TAGTCGCATAACTTGA	AACMGGATTAGATACCCKG	ACGTCATCCCCACCTTCC	TAGTCGCATA	ACTTGA	L1	P08	F2	Nippobare	Root	TSB	1	Rice	WildType
L1P08F3	TATATATACAACTTGA	AACMGGATTAGATACCCKG	ACGTCATCCCCACCTTCC	TATATATACA	ACTTGA	L1	P08	F3	Nippobare	Root	TSB	1	Rice	WildType
L1P08F4	TATGCTAGTAACTTGA	AACMGGATTAGATACCCKG	ACGTCATCCCCACCTTCC	TATGCTAGTA	ACTTGA	L1	P08	F4	Nippobare	Root	TSB	1	Rice	WildType
L1P08F5	TCACGCGAGAACTTGA	AACMGGATTAGATACCCKG	ACGTCATCCCCACCTTCC	TCACGCGAGA	ACTTGA	L1	P08	F5	Nippobare	Root	TSB	1	Rice	WildType
L1P08F6	TCGATAGTGAACTTGA	AACMGGATTAGATACCCKG	ACGTCATCCCCACCTTCC	TCGATAGTGA	ACTTGA	L1	P08	F6	Nippobare	Root	TSB	1	Rice	WildType
L1P08F7	TCGCTGCGTAACTTGA	AACMGGATTAGATACCCKG	ACGTCATCCCCACCTTCC	TCGCTGCGTA	ACTTGA	L1	P08	F7	Nippobare	Root	TSB	1	Rice	WildType
L1P08F8	TCTGACGTCAACTTGA	AACMGGATTAGATACCCKG	ACGTCATCCCCACCTTCC	TCTGACGTCA	ACTTGA	L1	P08	F8	Nippobare	Root	TSB	1	Rice	WildType
L1P08F9	TGAGTCAGTAACTTGA	AACMGGATTAGATACCCKG	ACGTCATCCCCACCTTCC	TGAGTCAGTA	ACTTGA	L1	P08	F9	Nippobare	Root	TSB	1	Rice	WildType
L1P08F10	CACTATACTCACTTGA	AACMGGATTAGATACCCKG	ACGTCATCCCCACCTTCC	CACTATACTC	ACTTGA	L1	P08	F10	Nippobare	Root	TSB	1	Rice	WildType
L1P08F11	TGTCACACGAACTTGA	AACMGGATTAGATACCCKG	ACGTCATCCCCACCTTCC	TGTCACACGA	ACTTGA	L1	P08	F11	Nippobare	Root	TSB	1	Rice	WildType
L1P08F12	TGTCGTCGCAACTTGA	AACMGGATTAGATACCCKG	ACGTCATCCCCACCTTCC	TGTCGTCGCA	ACTTGA	L1	P08	F12	Nippobare	Root	TSB	1	Rice	WildType
L1P08G1	ACACATACGCACTTGA	AACMGGATTAGATACCCKG	ACGTCATCCCCACCTTCC	ACACATACGC	ACTTGA	L1	P08	G1	Nippobare	Root	TSB	1	Rice	WildType
L1P08G2	ACAGTCGTGCACTTGA	AACMGGATTAGATACCCKG	ACGTCATCCCCACCTTCC	ACAGTCGTGC	ACTTGA	L1	P08	G2	Nippobare	Root	TSB	1	Rice	WildType
L1P08G3	ACATGACGACACTTGA	AACMGGATTAGATACCCKG	ACGTCATCCCCACCTTCC	ACATGACGAC	ACTTGA	L1	P08	G3	Nippobare	Root	TSB	1	Rice	WildType
L1P08G4	ACGACAGCTCACTTGA	AACMGGATTAGATACCCKG	ACGTCATCCCCACCTTCC	ACGACAGCTC	ACTTGA	L1	P08	G4	Nippobare	Root	TSB	1	Rice	WildType
L1P08G5	ACGTCTCATCACTTGA	AACMGGATTAGATACCCKG	ACGTCATCCCCACCTTCC	ACGTCTCATC	ACTTGA	L1	P08	G5	Nippobare	Root	TSB	1	Rice	WildType
L1P08G6	ACTCATCTACACTTGA	AACMGGATTAGATACCCKG	ACGTCATCCCCACCTTCC	ACTCATCTAC	ACTTGA	L1	P08	G6	Nippobare	Root	TSB	1	Rice	WildType
L1P08G7	ACTCGCGCACACTTGA	AACMGGATTAGATACCCKG	ACGTCATCCCCACCTTCC	ACTCGCGCAC	ACTTGA	L1	P08	G7	Nippobare	Root	TSB	1	Rice	WildType
L1P08G8	AGAGCGTCACACTTGA	AACMGGATTAGATACCCKG	ACGTCATCCCCACCTTCC	AGAGCGTCAC	ACTTGA	L1	P08	G8	Nippobare	Root	TSB	1	Rice	WildType
L1P08G9	AGCGACTAGCACTTGA	AACMGGATTAGATACCCKG	ACGTCATCCCCACCTTCC	AGCGACTAGC	ACTTGA	L1	P08	G9	Nippobare	Root	TSB	1	Rice	WildType
L1P08G10	CAGCGTACTGACTTGA	AACMGGATTAGATACCCKG	ACGTCATCCCCACCTTCC	CAGCGTACTG	ACTTGA	L1	P08	G10	Nippobare	Root	TSB	1	Rice	WildType
L1P08G11	AGTGACACACACTTGA	AACMGGATTAGATACCCKG	ACGTCATCCCCACCTTCC	AGTGACACAC	ACTTGA	L1	P08	G11	Nippobare	Root	TSB	1	Rice	WildType
L1P08G12	AGTGTATGTCACTTGA	AACMGGATTAGATACCCKG	ACGTCATCCCCACCTTCC	AGTGTATGTC	ACTTGA	L1	P08	G12	Nippobare	Root	TSB	1	Rice	WildType
L1P08H1	ATAGATAGACACTTGA	AACMGGATTAGATACCCKG	ACGTCATCCCCACCTTCC	ATAGATAGAC	ACTTGA	L1	P08	H1	Nippobare	Root	TSB	1	Rice	WildType
L1P08H2	ATATAGTCGCACTTGA	AACMGGATTAGATACCCKG	ACGTCATCCCCACCTTCC	ATATAGTCGC	ACTTGA	L1	P08	H2	Nippobare	Root	TSB	1	Rice	WildType
L1P08H3	ATCTACTGACACTTGA	AACMGGATTAGATACCCKG	ACGTCATCCCCACCTTCC	ATCTACTGAC	ACTTGA	L1	P08	H3	Nippobare	Root	TSB	1	Rice	WildType
L1P08H4	CACGTAGATCACTTGA	AACMGGATTAGATACCCKG	ACGTCATCCCCACCTTCC	CACGTAGATC	ACTTGA	L1	P08	H4	Nippobare	Root	TSB	1	Rice	WildType
L1P08H5	CACGTCTCGCACTTGA	AACMGGATTAGATACCCKG	ACGTCATCCCCACCTTCC	CACGTCTCGC	ACTTGA	L1	P08	H5	Nippobare	Root	TSB	1	Rice	WildType
L1P08H6	CATACTCTACACTTGA	AACMGGATTAGATACCCKG	ACGTCATCCCCACCTTCC	CATACTCTAC	ACTTGA	L1	P08	H6	Nippobare	Root	TSB	1	Rice	WildType
L1P08H7	CGACACTATCACTTGA	AACMGGATTAGATACCCKG	ACGTCATCCCCACCTTCC	CGACACTATC	ACTTGA	L1	P08	H7	Nippobare	Root	TSB	1	Rice	WildType
L1P08H8	CGAGACGCGCACTTGA	AACMGGATTAGATACCCKG	ACGTCATCCCCACCTTCC	CGAGACGCGC	ACTTGA	L1	P08	H8	Nippobare	Root	TSB	1	Rice	WildType
L1P08H9	CGTATGCGACACTTGA	AACMGGATTAGATACCCKG	ACGTCATCCCCACCTTCC	CGTATGCGAC	ACTTGA	L1	P08	H9	Nippobare	Root	TSB	1	Rice	WildType
L1P08H10	CGTCGATCTCACTTGA	AACMGGATTAGATACCCKG	ACGTCATCCCCACCTTCC	CGTCGATCTC	ACTTGA	L1	P08	H10	Nippobare	Root	TSB	1	Rice	WildType
L1P08H11	CTACGACTGCACTTGA	AACMGGATTAGATACCCKG	ACGTCATCCCCACCTTCC	CTACGACTGC	ACTTGA	L1	P08	H11	Nippobare	Root	TSB	1	Rice	WildType
L1P08H12	CTAGTCACTCACTTGA	AACMGGATTAGATACCCKG	ACGTCATCCCCACCTTCC	CTAGTCACTC	ACTTGA	L1	P08	H12	Nippobare	Root	TSB	1	Rice	WildType
L1P09A1	ACGCTCGACAGATCAG	AACMGGATTAGATACCCKG	ACGTCATCCCCACCTTCC	ACGCTCGACA	GATCAG	L1	P09	A1	Nippobare	Root	TSB	1	Rice	WildType
L1P09A2	AGACGCACTCGATCAG	AACMGGATTAGATACCCKG	ACGTCATCCCCACCTTCC	AGACGCACTC	GATCAG	L1	P09	A2	Nippobare	Root	TSB	1	Rice	WildType
L1P09A3	AGCACTGTAGGATCAG	AACMGGATTAGATACCCKG	ACGTCATCCCCACCTTCC	AGCACTGTAG	GATCAG	L1	P09	A3	Nippobare	Root	TSB	1	Rice	WildType
L1P09A4	ATCAGACACGGATCAG	AACMGGATTAGATACCCKG	ACGTCATCCCCACCTTCC	ATCAGACACG	GATCAG	L1	P09	A4	Nippobare	Root	TSB	1	Rice	WildType
L1P09A5	ATATCGCGAGGATCAG	AACMGGATTAGATACCCKG	ACGTCATCCCCACCTTCC	ATATCGCGAG	GATCAG	L1	P09	A5	Nippobare	Root	TSB	1	Rice	WildType
L1P09A6	CACGAGACAGGATCAG	AACMGGATTAGATACCCKG	ACGTCATCCCCACCTTCC	CACGAGACAG	GATCAG	L1	P09	A6	Nippobare	Root	TSB	1	Rice	WildType
L1P09A7	CTCGCGTGTCGATCAG	AACMGGATTAGATACCCKG	ACGTCATCCCCACCTTCC	CTCGCGTGTC	GATCAG	L1	P09	A7	Nippobare	Root	TSB	1	Rice	WildType
L1P09A8	TAGTATCAGCGATCAG	AACMGGATTAGATACCCKG	ACGTCATCCCCACCTTCC	TAGTATCAGC	GATCAG	L1	P09	A8	Nippobare	Root	TSB	1	Rice	WildType
L1P09A9	TCTCTATGCGGATCAG	AACMGGATTAGATACCCKG	ACGTCATCCCCACCTTCC	TCTCTATGCG	GATCAG	L1	P09	A9	Nippobare	Root	TSB	1	Rice	WildType
L1P09A10	TGATACGTCTGATCAG	AACMGGATTAGATACCCKG	ACGTCATCCCCACCTTCC	TGATACGTCT	GATCAG	L1	P09	A10	Nippobare	Root	TSB	1	Rice	WildType
L1P09A11	TACTGAGCTAGATCAG	AACMGGATTAGATACCCKG	ACGTCATCCCCACCTTCC	TACTGAGCTA	GATCAG	L1	P09	A11	Nippobare	Root	TSB	1	Rice	WildType
L1P09A12	CATAGTAGTGGATCAG	AACMGGATTAGATACCCKG	ACGTCATCCCCACCTTCC	CATAGTAGTG	GATCAG	L1	P09	A12	Nippobare	Root	TSB	1	Rice	WildType
L1P09B1	CGAGAGATACGATCAG	AACMGGATTAGATACCCKG	ACGTCATCCCCACCTTCC	CGAGAGATAC	GATCAG	L1	P09	B1	Nippobare	Root	TSB	1	Rice	WildType
L1P09B2	ATACGACGTAGATCAG	AACMGGATTAGATACCCKG	ACGTCATCCCCACCTTCC	ATACGACGTA	GATCAG	L1	P09	B2	Nippobare	Root	TSB	1	Rice	WildType
L1P09B3	TCACGTACTAGATCAG	AACMGGATTAGATACCCKG	ACGTCATCCCCACCTTCC	TCACGTACTA	GATCAG	L1	P09	B3	Nippobare	Root	TSB	1	Rice	WildType
L1P09B4	CGTCTAGTACGATCAG	AACMGGATTAGATACCCKG	ACGTCATCCCCACCTTCC	CGTCTAGTAC	GATCAG	L1	P09	B4	Nippobare	Root	TSB	1	Rice	WildType
L1P09B5	TCTACGTAGCGATCAG	AACMGGATTAGATACCCKG	ACGTCATCCCCACCTTCC	TCTACGTAGC	GATCAG	L1	P09	B5	Nippobare	Root	TSB	1	Rice	WildType
L1P09B6	CACGCGAGTCGATCAG	AACMGGATTAGATACCCKG	ACGTCATCCCCACCTTCC	CACGCGAGTC	GATCAG	L1	P09	B6	Nippobare	Root	TSB	1	Rice	WildType
L1P09B7	ACGACTACAGGATCAG	AACMGGATTAGATACCCKG	ACGTCATCCCCACCTTCC	ACGACTACAG	GATCAG	L1	P09	B7	Nippobare	Root	TSB	1	Rice	WildType
L1P09B8	CGTAGACTAGGATCAG	AACMGGATTAGATACCCKG	ACGTCATCCCCACCTTCC	CGTAGACTAG	GATCAG	L1	P09	B8	Nippobare	Root	TSB	1	Rice	WildType
L1P09B9	TACGAGTATGGATCAG	AACMGGATTAGATACCCKG	ACGTCATCCCCACCTTCC	TACGAGTATG	GATCAG	L1	P09	B9	Nippobare	Root	TSB	1	Rice	WildType
L1P09B10	TACTCTCGTGGATCAG	AACMGGATTAGATACCCKG	ACGTCATCCCCACCTTCC	TACTCTCGTG	GATCAG	L1	P09	B10	Nippobare	Root	TSB	1	Rice	WildType
L1P09B11	TAGAGACGAGGATCAG	AACMGGATTAGATACCCKG	ACGTCATCCCCACCTTCC	TAGAGACGAG	GATCAG	L1	P09	B11	Nippobare	Root	TSB	1	Rice	WildType
L1P09B12	TCGTCGCTCGGATCAG	AACMGGATTAGATACCCKG	ACGTCATCCCCACCTTCC	TCGTCGCTCG	GATCAG	L1	P09	B12	Nippobare	Root	TSB	1	Rice	WildType
L1P09C1	ACATACGCGTGATCAG	AACMGGATTAGATACCCKG	ACGTCATCCCCACCTTCC	ACATACGCGT	GATCAG	L1	P09	C1	Nippobare	Root	TSB	1	Rice	WildType
L1P09C2	ACGCGAGTATGATCAG	AACMGGATTAGATACCCKG	ACGTCATCCCCACCTTCC	ACGCGAGTAT	GATCAG	L1	P09	C2	Nippobare	Root	TSB	1	Rice	WildType
L1P09C3	ACTACTATGTGATCAG	AACMGGATTAGATACCCKG	ACGTCATCCCCACCTTCC	ACTACTATGT	GATCAG	L1	P09	C3	Nippobare	Root	TSB	1	Rice	WildType
L1P09C4	ACTGTACAGTGATCAG	AACMGGATTAGATACCCKG	ACGTCATCCCCACCTTCC	ACTGTACAGT	GATCAG	L1	P09	C4	Nippobare	Root	TSB	1	Rice	WildType
L1P09C5	AGACTATACTGATCAG	AACMGGATTAGATACCCKG	ACGTCATCCCCACCTTCC	AGACTATACT	GATCAG	L1	P09	C5	Nippobare	Root	TSB	1	Rice	WildType
L1P09C6	AGCGTCGTCTGATCAG	AACMGGATTAGATACCCKG	ACGTCATCCCCACCTTCC	AGCGTCGTCT	GATCAG	L1	P09	C6	Nippobare	Root	TSB	1	Rice	WildType
L1P09C7	AGTACGCTATGATCAG	AACMGGATTAGATACCCKG	ACGTCATCCCCACCTTCC	AGTACGCTAT	GATCAG	L1	P09	C7	Nippobare	Root	TSB	1	Rice	WildType
L1P09C8	CACGCTACGAGATCAG	AACMGGATTAGATACCCKG	ACGTCATCCCCACCTTCC	CACGCTACGA	GATCAG	L1	P09	C8	Nippobare	Root	TSB	1	Rice	WildType
L1P09C9	CACGCTACGTGATCAG	AACMGGATTAGATACCCKG	ACGTCATCCCCACCTTCC	CACGCTACGT	GATCAG	L1	P09	C9	Nippobare	Root	TSB	1	Rice	WildType
L1P09C10	CAGTAGACGTGATCAG	AACMGGATTAGATACCCKG	ACGTCATCCCCACCTTCC	CAGTAGACGT	GATCAG	L1	P09	C10	Nippobare	Root	TSB	1	Rice	WildType
L1P09C11	CGACGTGACTGATCAG	AACMGGATTAGATACCCKG	ACGTCATCCCCACCTTCC	CGACGTGACT	GATCAG	L1	P09	C11	Nippobare	Root	TSB	1	Rice	WildType
L1P09C12	CAGTCTCTAGGATCAG	AACMGGATTAGATACCCKG	ACGTCATCCCCACCTTCC	CAGTCTCTAG	GATCAG	L1	P09	C12	Nippobare	Root	TSB	1	Rice	WildType
L1P09D1	TACACGTGATGATCAG	AACMGGATTAGATACCCKG	ACGTCATCCCCACCTTCC	TACACGTGAT	GATCAG	L1	P09	D1	Nippobare	Root	TSB	1	Rice	WildType
L1P09D2	TACAGATCGTGATCAG	AACMGGATTAGATACCCKG	ACGTCATCCCCACCTTCC	TACAGATCGT	GATCAG	L1	P09	D2	Nippobare	Root	TSB	1	Rice	WildType
L1P09D3	TACGCTGTCTGATCAG	AACMGGATTAGATACCCKG	ACGTCATCCCCACCTTCC	TACGCTGTCT	GATCAG	L1	P09	D3	Nippobare	Root	TSB	1	Rice	WildType
L1P09D4	TAGTGTAGATGATCAG	AACMGGATTAGATACCCKG	ACGTCATCCCCACCTTCC	TAGTGTAGAT	GATCAG	L1	P09	D4	Nippobare	Root	TSB	1	Rice	WildType
L1P09D5	TCGATCACGTGATCAG	AACMGGATTAGATACCCKG	ACGTCATCCCCACCTTCC	TCGATCACGT	GATCAG	L1	P09	D5	Nippobare	Root	TSB	1	Rice	WildType
L1P09D6	TCGCACTAGTGATCAG	AACMGGATTAGATACCCKG	ACGTCATCCCCACCTTCC	TCGCACTAGT	GATCAG	L1	P09	D6	Nippobare	Root	TSB	1	Rice	WildType
L1P09D7	TCTAGCGACTGATCAG	AACMGGATTAGATACCCKG	ACGTCATCCCCACCTTCC	TCTAGCGACT	GATCAG	L1	P09	D7	Nippobare	Root	TSB	1	Rice	WildType
L1P09D8	CACGTGTATAGATCAG	AACMGGATTAGATACCCKG	ACGTCATCCCCACCTTCC	CACGTGTATA	GATCAG	L1	P09	D8	Nippobare	Root	TSB	1	Rice	WildType
L1P09D9	TGACGTATGTGATCAG	AACMGGATTAGATACCCKG	ACGTCATCCCCACCTTCC	TGACGTATGT	GATCAG	L1	P09	D9	Nippobare	Root	TSB	1	Rice	WildType
L1P09D10	CACTACGATGGATCAG	AACMGGATTAGATACCCKG	ACGTCATCCCCACCTTCC	CACTACGATG	GATCAG	L1	P09	D10	Nippobare	Root	TSB	1	Rice	WildType
L1P09D11	ACAGTATATAGATCAG	AACMGGATTAGATACCCKG	ACGTCATCCCCACCTTCC	ACAGTATATA	GATCAG	L1	P09	D11	Nippobare	Root	TSB	1	Rice	WildType
L1P09D12	ACGCGATCGAGATCAG	AACMGGATTAGATACCCKG	ACGTCATCCCCACCTTCC	ACGCGATCGA	GATCAG	L1	P09	D12	Nippobare	Root	TSB	1	Rice	WildType
L1P09E1	ACTAGCAGTAGATCAG	AACMGGATTAGATACCCKG	ACGTCATCCCCACCTTCC	ACTAGCAGTA	GATCAG	L1	P09	E1	Nippobare	Root	TSB	1	Rice	WildType
L1P09E2	AGCTCACGTAGATCAG	AACMGGATTAGATACCCKG	ACGTCATCCCCACCTTCC	AGCTCACGTA	GATCAG	L1	P09	E2	Nippobare	Root	TSB	1	Rice	WildType
L1P09E3	AGTATACATAGATCAG	AACMGGATTAGATACCCKG	ACGTCATCCCCACCTTCC	AGTATACATA	GATCAG	L1	P09	E3	Nippobare	Root	TSB	1	Rice	WildType
L1P09E4	AGTCGAGAGAGATCAG	AACMGGATTAGATACCCKG	ACGTCATCCCCACCTTCC	AGTCGAGAGA	GATCAG	L1	P09	E4	Nippobare	Root	TSB	1	Rice	WildType
L1P09E5	AGTGCTACGAGATCAG	AACMGGATTAGATACCCKG	ACGTCATCCCCACCTTCC	AGTGCTACGA	GATCAG	L1	P09	E5	Nippobare	Root	TSB	1	Rice	WildType
L1P09E6	CGATCGTATAGATCAG	AACMGGATTAGATACCCKG	ACGTCATCCCCACCTTCC	CGATCGTATA	GATCAG	L1	P09	E6	Nippobare	Root	TSB	1	Rice	WildType
L1P09E7	CGCAGTACGAGATCAG	AACMGGATTAGATACCCKG	ACGTCATCCCCACCTTCC	CGCAGTACGA	GATCAG	L1	P09	E7	Nippobare	Root	TSB	1	Rice	WildType
L1P09E8	CGCGTATACAGATCAG	AACMGGATTAGATACCCKG	ACGTCATCCCCACCTTCC	CGCGTATACA	GATCAG	L1	P09	E8	Nippobare	Root	TSB	1	Rice	WildType
L1P09E9	CGTACAGTCAGATCAG	AACMGGATTAGATACCCKG	ACGTCATCCCCACCTTCC	CGTACAGTCA	GATCAG	L1	P09	E9	Nippobare	Root	TSB	1	Rice	WildType
L1P09E10	CGTACTCAGAGATCAG	AACMGGATTAGATACCCKG	ACGTCATCCCCACCTTCC	CGTACTCAGA	GATCAG	L1	P09	E10	Nippobare	Root	TSB	1	Rice	WildType
L1P09E11	CTACGCTCTAGATCAG	AACMGGATTAGATACCCKG	ACGTCATCCCCACCTTCC	CTACGCTCTA	GATCAG	L1	P09	E11	Nippobare	Root	TSB	1	Rice	WildType
L1P09E12	CTATAGCGTAGATCAG	AACMGGATTAGATACCCKG	ACGTCATCCCCACCTTCC	CTATAGCGTA	GATCAG	L1	P09	E12	Nippobare	Root	TSB	1	Rice	WildType
L1P09F1	TACGTCATCAGATCAG	AACMGGATTAGATACCCKG	ACGTCATCCCCACCTTCC	TACGTCATCA	GATCAG	L1	P09	F1	Nippobare	Root	TSB	1	Rice	WildType
L1P09F2	TAGTCGCATAGATCAG	AACMGGATTAGATACCCKG	ACGTCATCCCCACCTTCC	TAGTCGCATA	GATCAG	L1	P09	F2	Nippobare	Root	TSB	1	Rice	WildType
L1P09F3	TATATATACAGATCAG	AACMGGATTAGATACCCKG	ACGTCATCCCCACCTTCC	TATATATACA	GATCAG	L1	P09	F3	Nippobare	Root	TSB	1	Rice	WildType
L1P09F4	TATGCTAGTAGATCAG	AACMGGATTAGATACCCKG	ACGTCATCCCCACCTTCC	TATGCTAGTA	GATCAG	L1	P09	F4	Nippobare	Root	TSB	1	Rice	WildType
L1P09F5	TCACGCGAGAGATCAG	AACMGGATTAGATACCCKG	ACGTCATCCCCACCTTCC	TCACGCGAGA	GATCAG	L1	P09	F5	Nippobare	Root	TSB	1	Rice	WildType
L1P09F6	TCGATAGTGAGATCAG	AACMGGATTAGATACCCKG	ACGTCATCCCCACCTTCC	TCGATAGTGA	GATCAG	L1	P09	F6	Nippobare	Root	TSB	1	Rice	WildType
L1P09F7	TCGCTGCGTAGATCAG	AACMGGATTAGATACCCKG	ACGTCATCCCCACCTTCC	TCGCTGCGTA	GATCAG	L1	P09	F7	Nippobare	Root	TSB	1	Rice	WildType
L1P09F8	TCTGACGTCAGATCAG	AACMGGATTAGATACCCKG	ACGTCATCCCCACCTTCC	TCTGACGTCA	GATCAG	L1	P09	F8	Nippobare	Root	TSB	1	Rice	WildType
L1P09F9	TGAGTCAGTAGATCAG	AACMGGATTAGATACCCKG	ACGTCATCCCCACCTTCC	TGAGTCAGTA	GATCAG	L1	P09	F9	Nippobare	Root	TSB	1	Rice	WildType
L1P09F10	CACTATACTCGATCAG	AACMGGATTAGATACCCKG	ACGTCATCCCCACCTTCC	CACTATACTC	GATCAG	L1	P09	F10	Nippobare	Root	TSB	1	Rice	WildType
L1P09F11	TGTCACACGAGATCAG	AACMGGATTAGATACCCKG	ACGTCATCCCCACCTTCC	TGTCACACGA	GATCAG	L1	P09	F11	Nippobare	Root	TSB	1	Rice	WildType
L1P09F12	TGTCGTCGCAGATCAG	AACMGGATTAGATACCCKG	ACGTCATCCCCACCTTCC	TGTCGTCGCA	GATCAG	L1	P09	F12	Nippobare	Root	TSB	1	Rice	WildType
L1P09G1	ACACATACGCGATCAG	AACMGGATTAGATACCCKG	ACGTCATCCCCACCTTCC	ACACATACGC	GATCAG	L1	P09	G1	Nippobare	Root	TSB	1	Rice	WildType
L1P09G2	ACAGTCGTGCGATCAG	AACMGGATTAGATACCCKG	ACGTCATCCCCACCTTCC	ACAGTCGTGC	GATCAG	L1	P09	G2	Nippobare	Root	TSB	1	Rice	WildType
L1P09G3	ACATGACGACGATCAG	AACMGGATTAGATACCCKG	ACGTCATCCCCACCTTCC	ACATGACGAC	GATCAG	L1	P09	G3	Nippobare	Root	TSB	1	Rice	WildType
L1P09G4	ACGACAGCTCGATCAG	AACMGGATTAGATACCCKG	ACGTCATCCCCACCTTCC	ACGACAGCTC	GATCAG	L1	P09	G4	Nippobare	Root	TSB	1	Rice	WildType
L1P09G5	ACGTCTCATCGATCAG	AACMGGATTAGATACCCKG	ACGTCATCCCCACCTTCC	ACGTCTCATC	GATCAG	L1	P09	G5	Nippobare	Root	TSB	1	Rice	WildType
L1P09G6	ACTCATCTACGATCAG	AACMGGATTAGATACCCKG	ACGTCATCCCCACCTTCC	ACTCATCTAC	GATCAG	L1	P09	G6	Nippobare	Root	TSB	1	Rice	WildType
L1P09G7	ACTCGCGCACGATCAG	AACMGGATTAGATACCCKG	ACGTCATCCCCACCTTCC	ACTCGCGCAC	GATCAG	L1	P09	G7	Nippobare	Root	TSB	1	Rice	WildType
L1P09G8	AGAGCGTCACGATCAG	AACMGGATTAGATACCCKG	ACGTCATCCCCACCTTCC	AGAGCGTCAC	GATCAG	L1	P09	G8	Nippobare	Root	TSB	1	Rice	WildType
L1P09G9	AGCGACTAGCGATCAG	AACMGGATTAGATACCCKG	ACGTCATCCCCACCTTCC	AGCGACTAGC	GATCAG	L1	P09	G9	Nippobare	Root	TSB	1	Rice	WildType
L1P09G10	CAGCGTACTGGATCAG	AACMGGATTAGATACCCKG	ACGTCATCCCCACCTTCC	CAGCGTACTG	GATCAG	L1	P09	G10	Nippobare	Root	TSB	1	Rice	WildType
L1P09G11	AGTGACACACGATCAG	AACMGGATTAGATACCCKG	ACGTCATCCCCACCTTCC	AGTGACACAC	GATCAG	L1	P09	G11	Nippobare	Root	TSB	1	Rice	WildType
L1P09G12	AGTGTATGTCGATCAG	AACMGGATTAGATACCCKG	ACGTCATCCCCACCTTCC	AGTGTATGTC	GATCAG	L1	P09	G12	Nippobare	Root	TSB	1	Rice	WildType
L1P09H1	ATAGATAGACGATCAG	AACMGGATTAGATACCCKG	ACGTCATCCCCACCTTCC	ATAGATAGAC	GATCAG	L1	P09	H1	Nippobare	Root	TSB	1	Rice	WildType
L1P09H2	ATATAGTCGCGATCAG	AACMGGATTAGATACCCKG	ACGTCATCCCCACCTTCC	ATATAGTCGC	GATCAG	L1	P09	H2	Nippobare	Root	TSB	1	Rice	WildType
L1P09H3	ATCTACTGACGATCAG	AACMGGATTAGATACCCKG	ACGTCATCCCCACCTTCC	ATCTACTGAC	GATCAG	L1	P09	H3	Nippobare	Root	TSB	1	Rice	WildType
L1P09H4	CACGTAGATCGATCAG	AACMGGATTAGATACCCKG	ACGTCATCCCCACCTTCC	CACGTAGATC	GATCAG	L1	P09	H4	Nippobare	Root	TSB	1	Rice	WildType
L1P09H5	CACGTCTCGCGATCAG	AACMGGATTAGATACCCKG	ACGTCATCCCCACCTTCC	CACGTCTCGC	GATCAG	L1	P09	H5	Nippobare	Root	TSB	1	Rice	WildType
L1P09H6	CATACTCTACGATCAG	AACMGGATTAGATACCCKG	ACGTCATCCCCACCTTCC	CATACTCTAC	GATCAG	L1	P09	H6	Nippobare	Root	TSB	1	Rice	WildType
L1P09H7	CGACACTATCGATCAG	AACMGGATTAGATACCCKG	ACGTCATCCCCACCTTCC	CGACACTATC	GATCAG	L1	P09	H7	Nippobare	Root	TSB	1	Rice	WildType
L1P09H8	CGAGACGCGCGATCAG	AACMGGATTAGATACCCKG	ACGTCATCCCCACCTTCC	CGAGACGCGC	GATCAG	L1	P09	H8	Nippobare	Root	TSB	1	Rice	WildType
L1P09H9	CGTATGCGACGATCAG	AACMGGATTAGATACCCKG	ACGTCATCCCCACCTTCC	CGTATGCGAC	GATCAG	L1	P09	H9	Nippobare	Root	TSB	1	Rice	WildType
L1P09H10	CGTCGATCTCGATCAG	AACMGGATTAGATACCCKG	ACGTCATCCCCACCTTCC	CGTCGATCTC	GATCAG	L1	P09	H10	Nippobare	Root	TSB	1	Rice	WildType
L1P09H11	CTACGACTGCGATCAG	AACMGGATTAGATACCCKG	ACGTCATCCCCACCTTCC	CTACGACTGC	GATCAG	L1	P09	H11	Nippobare	Root	TSB	1	Rice	WildType
L1P09H12	CTAGTCACTCGATCAG	AACMGGATTAGATACCCKG	ACGTCATCCCCACCTTCC	CTAGTCACTC	GATCAG	L1	P09	H12	Nippobare	Root	TSB	1	Rice	WildType
L1P10A1	ACGCTCGACATAGCTT	AACMGGATTAGATACCCKG	ACGTCATCCCCACCTTCC	ACGCTCGACA	TAGCTT	L1	P10	A1	Nippobare	Root	TSB	1	Rice	WildType
L1P10A2	AGACGCACTCTAGCTT	AACMGGATTAGATACCCKG	ACGTCATCCCCACCTTCC	AGACGCACTC	TAGCTT	L1	P10	A2	Nippobare	Root	TSB	1	Rice	WildType
L1P10A3	AGCACTGTAGTAGCTT	AACMGGATTAGATACCCKG	ACGTCATCCCCACCTTCC	AGCACTGTAG	TAGCTT	L1	P10	A3	Nippobare	Root	TSB	1	Rice	WildType
L1P10A4	ATCAGACACGTAGCTT	AACMGGATTAGATACCCKG	ACGTCATCCCCACCTTCC	ATCAGACACG	TAGCTT	L1	P10	A4	Nippobare	Root	TSB	1	Rice	WildType
L1P10A5	ATATCGCGAGTAGCTT	AACMGGATTAGATACCCKG	ACGTCATCCCCACCTTCC	ATATCGCGAG	TAGCTT	L1	P10	A5	Nippobare	Root	TSB	1	Rice	WildType
L1P10A6	CACGAGACAGTAGCTT	AACMGGATTAGATACCCKG	ACGTCATCCCCACCTTCC	CACGAGACAG	TAGCTT	L1	P10	A6	Nippobare	Root	TSB	1	Rice	WildType
L1P10A7	CTCGCGTGTCTAGCTT	AACMGGATTAGATACCCKG	ACGTCATCCCCACCTTCC	CTCGCGTGTC	TAGCTT	L1	P10	A7	Nippobare	Root	TSB	1	Rice	WildType
L1P10A8	TAGTATCAGCTAGCTT	AACMGGATTAGATACCCKG	ACGTCATCCCCACCTTCC	TAGTATCAGC	TAGCTT	L1	P10	A8	Nippobare	Root	TSB	1	Rice	WildType
L1P10A9	TCTCTATGCGTAGCTT	AACMGGATTAGATACCCKG	ACGTCATCCCCACCTTCC	TCTCTATGCG	TAGCTT	L1	P10	A9	Nippobare	Root	TSB	1	Rice	WildType
L1P10A10	TGATACGTCTTAGCTT	AACMGGATTAGATACCCKG	ACGTCATCCCCACCTTCC	TGATACGTCT	TAGCTT	L1	P10	A10	Nippobare	Root	TSB	1	Rice	WildType
L1P10A11	TACTGAGCTATAGCTT	AACMGGATTAGATACCCKG	ACGTCATCCCCACCTTCC	TACTGAGCTA	TAGCTT	L1	P10	A11	Nippobare	Root	TSB	1	Rice	WildType
L1P10A12	CATAGTAGTGTAGCTT	AACMGGATTAGATACCCKG	ACGTCATCCCCACCTTCC	CATAGTAGTG	TAGCTT	L1	P10	A12	Nippobare	Root	TSB	1	Rice	WildType
L1P10B1	CGAGAGATACTAGCTT	AACMGGATTAGATACCCKG	ACGTCATCCCCACCTTCC	CGAGAGATAC	TAGCTT	L1	P10	B1	Nippobare	Root	TSB	1	Rice	WildType
L1P10B2	ATACGACGTATAGCTT	AACMGGATTAGATACCCKG	ACGTCATCCCCACCTTCC	ATACGACGTA	TAGCTT	L1	P10	B2	Nippobare	Root	TSB	1	Rice	WildType
L1P10B3	TCACGTACTATAGCTT	AACMGGATTAGATACCCKG	ACGTCATCCCCACCTTCC	TCACGTACTA	TAGCTT	L1	P10	B3	Nippobare	Root	TSB	1	Rice	WildType
L1P10B4	CGTCTAGTACTAGCTT	AACMGGATTAGATACCCKG	ACGTCATCCCCACCTTCC	CGTCTAGTAC	TAGCTT	L1	P10	B4	Nippobare	Root	TSB	1	Rice	WildType
L1P10B5	TCTACGTAGCTAGCTT	AACMGGATTAGATACCCKG	ACGTCATCCCCACCTTCC	TCTACGTAGC	TAGCTT	L1	P10	B5	Nippobare	Root	TSB	1	Rice	WildType
L1P10B6	CACGCGAGTCTAGCTT	AACMGGATTAGATACCCKG	ACGTCATCCCCACCTTCC	CACGCGAGTC	TAGCTT	L1	P10	B6	Nippobare	Root	TSB	1	Rice	WildType
L1P10B7	ACGACTACAGTAGCTT	AACMGGATTAGATACCCKG	ACGTCATCCCCACCTTCC	ACGACTACAG	TAGCTT	L1	P10	B7	Nippobare	Root	TSB	1	Rice	WildType
L1P10B8	CGTAGACTAGTAGCTT	AACMGGATTAGATACCCKG	ACGTCATCCCCACCTTCC	CGTAGACTAG	TAGCTT	L1	P10	B8	Nippobare	Root	TSB	1	Rice	WildType
L1P10B9	TACGAGTATGTAGCTT	AACMGGATTAGATACCCKG	ACGTCATCCCCACCTTCC	TACGAGTATG	TAGCTT	L1	P10	B9	Nippobare	Root	TSB	1	Rice	WildType
L1P10B10	TACTCTCGTGTAGCTT	AACMGGATTAGATACCCKG	ACGTCATCCCCACCTTCC	TACTCTCGTG	TAGCTT	L1	P10	B10	Nippobare	Root	TSB	1	Rice	WildType
L1P10B11	TAGAGACGAGTAGCTT	AACMGGATTAGATACCCKG	ACGTCATCCCCACCTTCC	TAGAGACGAG	TAGCTT	L1	P10	B11	Nippobare	Root	TSB	1	Rice	WildType
L1P10B12	TCGTCGCTCGTAGCTT	AACMGGATTAGATACCCKG	ACGTCATCCCCACCTTCC	TCGTCGCTCG	TAGCTT	L1	P10	B12	Nippobare	Root	TSB	1	Rice	WildType
L1P10C1	ACATACGCGTTAGCTT	AACMGGATTAGATACCCKG	ACGTCATCCCCACCTTCC	ACATACGCGT	TAGCTT	L1	P10	C1	Nippobare	Root	TSB	1	Rice	WildType
L1P10C2	ACGCGAGTATTAGCTT	AACMGGATTAGATACCCKG	ACGTCATCCCCACCTTCC	ACGCGAGTAT	TAGCTT	L1	P10	C2	Nippobare	Root	TSB	1	Rice	WildType
L1P10C3	ACTACTATGTTAGCTT	AACMGGATTAGATACCCKG	ACGTCATCCCCACCTTCC	ACTACTATGT	TAGCTT	L1	P10	C3	Nippobare	Root	TSB	1	Rice	WildType
L1P10C4	ACTGTACAGTTAGCTT	AACMGGATTAGATACCCKG	ACGTCATCCCCACCTTCC	ACTGTACAGT	TAGCTT	L1	P10	C4	Nippobare	Root	TSB	1	Rice	WildType
L1P10C5	AGACTATACTTAGCTT	AACMGGATTAGATACCCKG	ACGTCATCCCCACCTTCC	AGACTATACT	TAGCTT	L1	P10	C5	Nippobare	Root	TSB	1	Rice	WildType
L1P10C6	AGCGTCGTCTTAGCTT	AACMGGATTAGATACCCKG	ACGTCATCCCCACCTTCC	AGCGTCGTCT	TAGCTT	L1	P10	C6	Nippobare	Root	TSB	1	Rice	WildType
L1P10C7	AGTACGCTATTAGCTT	AACMGGATTAGATACCCKG	ACGTCATCCCCACCTTCC	AGTACGCTAT	TAGCTT	L1	P10	C7	Nippobare	Root	TSB	1	Rice	WildType
L1P10C8	CACGCTACGATAGCTT	AACMGGATTAGATACCCKG	ACGTCATCCCCACCTTCC	CACGCTACGA	TAGCTT	L1	P10	C8	Nippobare	Root	TSB	1	Rice	WildType
L1P10C9	CACGCTACGTTAGCTT	AACMGGATTAGATACCCKG	ACGTCATCCCCACCTTCC	CACGCTACGT	TAGCTT	L1	P10	C9	Nippobare	Root	TSB	1	Rice	WildType
L1P10C10	CAGTAGACGTTAGCTT	AACMGGATTAGATACCCKG	ACGTCATCCCCACCTTCC	CAGTAGACGT	TAGCTT	L1	P10	C10	Nippobare	Root	TSB	1	Rice	WildType
L1P10C11	CGACGTGACTTAGCTT	AACMGGATTAGATACCCKG	ACGTCATCCCCACCTTCC	CGACGTGACT	TAGCTT	L1	P10	C11	Nippobare	Root	TSB	1	Rice	WildType
L1P10C12	CAGTCTCTAGTAGCTT	AACMGGATTAGATACCCKG	ACGTCATCCCCACCTTCC	CAGTCTCTAG	TAGCTT	L1	P10	C12	Nippobare	Root	TSB	1	Rice	WildType
L1P10D1	TACACGTGATTAGCTT	AACMGGATTAGATACCCKG	ACGTCATCCCCACCTTCC	TACACGTGAT	TAGCTT	L1	P10	D1	Nippobare	Root	TSB	1	Rice	WildType
L1P10D2	TACAGATCGTTAGCTT	AACMGGATTAGATACCCKG	ACGTCATCCCCACCTTCC	TACAGATCGT	TAGCTT	L1	P10	D2	Nippobare	Root	TSB	1	Rice	WildType
L1P10D3	TACGCTGTCTTAGCTT	AACMGGATTAGATACCCKG	ACGTCATCCCCACCTTCC	TACGCTGTCT	TAGCTT	L1	P10	D3	Nippobare	Root	TSB	1	Rice	WildType
L1P10D4	TAGTGTAGATTAGCTT	AACMGGATTAGATACCCKG	ACGTCATCCCCACCTTCC	TAGTGTAGAT	TAGCTT	L1	P10	D4	Nippobare	Root	TSB	1	Rice	WildType
L1P10D5	TCGATCACGTTAGCTT	AACMGGATTAGATACCCKG	ACGTCATCCCCACCTTCC	TCGATCACGT	TAGCTT	L1	P10	D5	Nippobare	Root	TSB	1	Rice	WildType
L1P10D6	TCGCACTAGTTAGCTT	AACMGGATTAGATACCCKG	ACGTCATCCCCACCTTCC	TCGCACTAGT	TAGCTT	L1	P10	D6	Nippobare	Root	TSB	1	Rice	WildType
L1P10D7	TCTAGCGACTTAGCTT	AACMGGATTAGATACCCKG	ACGTCATCCCCACCTTCC	TCTAGCGACT	TAGCTT	L1	P10	D7	Nippobare	Root	TSB	1	Rice	WildType
L1P10D8	CACGTGTATATAGCTT	AACMGGATTAGATACCCKG	ACGTCATCCCCACCTTCC	CACGTGTATA	TAGCTT	L1	P10	D8	Nippobare	Root	TSB	1	Rice	WildType
L1P10D9	TGACGTATGTTAGCTT	AACMGGATTAGATACCCKG	ACGTCATCCCCACCTTCC	TGACGTATGT	TAGCTT	L1	P10	D9	Nippobare	Root	TSB	1	Rice	WildType
L1P10D10	CACTACGATGTAGCTT	AACMGGATTAGATACCCKG	ACGTCATCCCCACCTTCC	CACTACGATG	TAGCTT	L1	P10	D10	Nippobare	Root	TSB	1	Rice	WildType
L1P10D11	ACAGTATATATAGCTT	AACMGGATTAGATACCCKG	ACGTCATCCCCACCTTCC	ACAGTATATA	TAGCTT	L1	P10	D11	Nippobare	Root	TSB	1	Rice	WildType
L1P10D12	ACGCGATCGATAGCTT	AACMGGATTAGATACCCKG	ACGTCATCCCCACCTTCC	ACGCGATCGA	TAGCTT	L1	P10	D12	Nippobare	Root	TSB	1	Rice	WildType
L1P10E1	ACTAGCAGTATAGCTT	AACMGGATTAGATACCCKG	ACGTCATCCCCACCTTCC	ACTAGCAGTA	TAGCTT	L1	P10	E1	Nippobare	Root	TSB	1	Rice	WildType
L1P10E2	AGCTCACGTATAGCTT	AACMGGATTAGATACCCKG	ACGTCATCCCCACCTTCC	AGCTCACGTA	TAGCTT	L1	P10	E2	Nippobare	Root	TSB	1	Rice	WildType
L1P10E3	AGTATACATATAGCTT	AACMGGATTAGATACCCKG	ACGTCATCCCCACCTTCC	AGTATACATA	TAGCTT	L1	P10	E3	Nippobare	Root	TSB	1	Rice	WildType
L1P10E4	AGTCGAGAGATAGCTT	AACMGGATTAGATACCCKG	ACGTCATCCCCACCTTCC	AGTCGAGAGA	TAGCTT	L1	P10	E4	Nippobare	Root	TSB	1	Rice	WildType
L1P10E5	AGTGCTACGATAGCTT	AACMGGATTAGATACCCKG	ACGTCATCCCCACCTTCC	AGTGCTACGA	TAGCTT	L1	P10	E5	Nippobare	Root	TSB	1	Rice	WildType
L1P10E6	CGATCGTATATAGCTT	AACMGGATTAGATACCCKG	ACGTCATCCCCACCTTCC	CGATCGTATA	TAGCTT	L1	P10	E6	Nippobare	Root	TSB	1	Rice	WildType
L1P10E7	CGCAGTACGATAGCTT	AACMGGATTAGATACCCKG	ACGTCATCCCCACCTTCC	CGCAGTACGA	TAGCTT	L1	P10	E7	Nippobare	Root	TSB	1	Rice	WildType
L1P10E8	CGCGTATACATAGCTT	AACMGGATTAGATACCCKG	ACGTCATCCCCACCTTCC	CGCGTATACA	TAGCTT	L1	P10	E8	Nippobare	Root	TSB	1	Rice	WildType
L1P10E9	CGTACAGTCATAGCTT	AACMGGATTAGATACCCKG	ACGTCATCCCCACCTTCC	CGTACAGTCA	TAGCTT	L1	P10	E9	Nippobare	Root	TSB	1	Rice	WildType
L1P10E10	CGTACTCAGATAGCTT	AACMGGATTAGATACCCKG	ACGTCATCCCCACCTTCC	CGTACTCAGA	TAGCTT	L1	P10	E10	Nippobare	Root	TSB	1	Rice	WildType
L1P10E11	CTACGCTCTATAGCTT	AACMGGATTAGATACCCKG	ACGTCATCCCCACCTTCC	CTACGCTCTA	TAGCTT	L1	P10	E11	Nippobare	Root	TSB	1	Rice	WildType
L1P10E12	CTATAGCGTATAGCTT	AACMGGATTAGATACCCKG	ACGTCATCCCCACCTTCC	CTATAGCGTA	TAGCTT	L1	P10	E12	Nippobare	Root	TSB	1	Rice	WildType
L1P10F1	TACGTCATCATAGCTT	AACMGGATTAGATACCCKG	ACGTCATCCCCACCTTCC	TACGTCATCA	TAGCTT	L1	P10	F1	Nippobare	Root	TSB	1	Rice	WildType
L1P10F2	TAGTCGCATATAGCTT	AACMGGATTAGATACCCKG	ACGTCATCCCCACCTTCC	TAGTCGCATA	TAGCTT	L1	P10	F2	Nippobare	Root	TSB	1	Rice	WildType
L1P10F3	TATATATACATAGCTT	AACMGGATTAGATACCCKG	ACGTCATCCCCACCTTCC	TATATATACA	TAGCTT	L1	P10	F3	Nippobare	Root	TSB	1	Rice	WildType
L1P10F4	TATGCTAGTATAGCTT	AACMGGATTAGATACCCKG	ACGTCATCCCCACCTTCC	TATGCTAGTA	TAGCTT	L1	P10	F4	Nippobare	Root	TSB	1	Rice	WildType
L1P10F5	TCACGCGAGATAGCTT	AACMGGATTAGATACCCKG	ACGTCATCCCCACCTTCC	TCACGCGAGA	TAGCTT	L1	P10	F5	Nippobare	Root	TSB	1	Rice	WildType
L1P10F6	TCGATAGTGATAGCTT	AACMGGATTAGATACCCKG	ACGTCATCCCCACCTTCC	TCGATAGTGA	TAGCTT	L1	P10	F6	Nippobare	Root	TSB	1	Rice	WildType
L1P10F7	TCGCTGCGTATAGCTT	AACMGGATTAGATACCCKG	ACGTCATCCCCACCTTCC	TCGCTGCGTA	TAGCTT	L1	P10	F7	Nippobare	Root	TSB	1	Rice	WildType
L1P10F8	TCTGACGTCATAGCTT	AACMGGATTAGATACCCKG	ACGTCATCCCCACCTTCC	TCTGACGTCA	TAGCTT	L1	P10	F8	Nippobare	Root	TSB	1	Rice	WildType
L1P10F9	TGAGTCAGTATAGCTT	AACMGGATTAGATACCCKG	ACGTCATCCCCACCTTCC	TGAGTCAGTA	TAGCTT	L1	P10	F9	Nippobare	Root	TSB	1	Rice	WildType
L1P10F10	CACTATACTCTAGCTT	AACMGGATTAGATACCCKG	ACGTCATCCCCACCTTCC	CACTATACTC	TAGCTT	L1	P10	F10	Nippobare	Root	TSB	1	Rice	WildType
L1P10F11	TGTCACACGATAGCTT	AACMGGATTAGATACCCKG	ACGTCATCCCCACCTTCC	TGTCACACGA	TAGCTT	L1	P10	F11	Nippobare	Root	TSB	1	Rice	WildType
L1P10F12	TGTCGTCGCATAGCTT	AACMGGATTAGATACCCKG	ACGTCATCCCCACCTTCC	TGTCGTCGCA	TAGCTT	L1	P10	F12	Nippobare	Root	TSB	1	Rice	WildType
L1P10G1	ACACATACGCTAGCTT	AACMGGATTAGATACCCKG	ACGTCATCCCCACCTTCC	ACACATACGC	TAGCTT	L1	P10	G1	Nippobare	Root	TSB	1	Rice	WildType
L1P10G2	ACAGTCGTGCTAGCTT	AACMGGATTAGATACCCKG	ACGTCATCCCCACCTTCC	ACAGTCGTGC	TAGCTT	L1	P10	G2	Nippobare	Root	TSB	1	Rice	WildType
L1P10G3	ACATGACGACTAGCTT	AACMGGATTAGATACCCKG	ACGTCATCCCCACCTTCC	ACATGACGAC	TAGCTT	L1	P10	G3	Nippobare	Root	TSB	1	Rice	WildType
L1P10G4	ACGACAGCTCTAGCTT	AACMGGATTAGATACCCKG	ACGTCATCCCCACCTTCC	ACGACAGCTC	TAGCTT	L1	P10	G4	Nippobare	Root	TSB	1	Rice	WildType
L1P10G5	ACGTCTCATCTAGCTT	AACMGGATTAGATACCCKG	ACGTCATCCCCACCTTCC	ACGTCTCATC	TAGCTT	L1	P10	G5	Nippobare	Root	TSB	1	Rice	WildType
L1P10G6	ACTCATCTACTAGCTT	AACMGGATTAGATACCCKG	ACGTCATCCCCACCTTCC	ACTCATCTAC	TAGCTT	L1	P10	G6	Nippobare	Root	TSB	1	Rice	WildType
L1P10G7	ACTCGCGCACTAGCTT	AACMGGATTAGATACCCKG	ACGTCATCCCCACCTTCC	ACTCGCGCAC	TAGCTT	L1	P10	G7	Nippobare	Root	TSB	1	Rice	WildType
L1P10G8	AGAGCGTCACTAGCTT	AACMGGATTAGATACCCKG	ACGTCATCCCCACCTTCC	AGAGCGTCAC	TAGCTT	L1	P10	G8	Nippobare	Root	TSB	1	Rice	WildType
L1P10G9	AGCGACTAGCTAGCTT	AACMGGATTAGATACCCKG	ACGTCATCCCCACCTTCC	AGCGACTAGC	TAGCTT	L1	P10	G9	Nippobare	Root	TSB	1	Rice	WildType
L1P10G10	CAGCGTACTGTAGCTT	AACMGGATTAGATACCCKG	ACGTCATCCCCACCTTCC	CAGCGTACTG	TAGCTT	L1	P10	G10	Nippobare	Root	TSB	1	Rice	WildType
L1P10G11	AGTGACACACTAGCTT	AACMGGATTAGATACCCKG	ACGTCATCCCCACCTTCC	AGTGACACAC	TAGCTT	L1	P10	G11	Nippobare	Root	TSB	1	Rice	WildType
L1P10G12	AGTGTATGTCTAGCTT	AACMGGATTAGATACCCKG	ACGTCATCCCCACCTTCC	AGTGTATGTC	TAGCTT	L1	P10	G12	Nippobare	Root	TSB	1	Rice	WildType
L1P10H1	ATAGATAGACTAGCTT	AACMGGATTAGATACCCKG	ACGTCATCCCCACCTTCC	ATAGATAGAC	TAGCTT	L1	P10	H1	Nippobare	Root	TSB	1	Rice	WildType
L1P10H2	ATATAGTCGCTAGCTT	AACMGGATTAGATACCCKG	ACGTCATCCCCACCTTCC	ATATAGTCGC	TAGCTT	L1	P10	H2	Nippobare	Root	TSB	1	Rice	WildType
L1P10H3	ATCTACTGACTAGCTT	AACMGGATTAGATACCCKG	ACGTCATCCCCACCTTCC	ATCTACTGAC	TAGCTT	L1	P10	H3	Nippobare	Root	TSB	1	Rice	WildType
L1P10H4	CACGTAGATCTAGCTT	AACMGGATTAGATACCCKG	ACGTCATCCCCACCTTCC	CACGTAGATC	TAGCTT	L1	P10	H4	Nippobare	Root	TSB	1	Rice	WildType
L1P10H5	CACGTCTCGCTAGCTT	AACMGGATTAGATACCCKG	ACGTCATCCCCACCTTCC	CACGTCTCGC	TAGCTT	L1	P10	H5	Nippobare	Root	TSB	1	Rice	WildType
L1P10H6	CATACTCTACTAGCTT	AACMGGATTAGATACCCKG	ACGTCATCCCCACCTTCC	CATACTCTAC	TAGCTT	L1	P10	H6	Nippobare	Root	TSB	1	Rice	WildType
L1P10H7	CGACACTATCTAGCTT	AACMGGATTAGATACCCKG	ACGTCATCCCCACCTTCC	CGACACTATC	TAGCTT	L1	P10	H7	Nippobare	Root	TSB	1	Rice	WildType
L1P10H8	CGAGACGCGCTAGCTT	AACMGGATTAGATACCCKG	ACGTCATCCCCACCTTCC	CGAGACGCGC	TAGCTT	L1	P10	H8	Nippobare	Root	TSB	1	Rice	WildType
L1P10H9	CGTATGCGACTAGCTT	AACMGGATTAGATACCCKG	ACGTCATCCCCACCTTCC	CGTATGCGAC	TAGCTT	L1	P10	H9	Nippobare	Root	TSB	1	Rice	WildType
L1P10H10	CGTCGATCTCTAGCTT	AACMGGATTAGATACCCKG	ACGTCATCCCCACCTTCC	CGTCGATCTC	TAGCTT	L1	P10	H10	Nippobare	Root	TSB	1	Rice	WildType
L1P10H11	CTACGACTGCTAGCTT	AACMGGATTAGATACCCKG	ACGTCATCCCCACCTTCC	CTACGACTGC	TAGCTT	L1	P10	H11	Nippobare	Root	TSB	1	Rice	WildType
L1P10H12	CTAGTCACTCTAGCTT	AACMGGATTAGATACCCKG	ACGTCATCCCCACCTTCC	CTAGTCACTC	TAGCTT	L1	P10	H12	Nippobare	Root	TSB	1	Rice	WildType
L1P11A1	ACGCTCGACAGGCTAC	AACMGGATTAGATACCCKG	ACGTCATCCCCACCTTCC	ACGCTCGACA	GGCTAC	L1	P11	A1	Nippobare	Root	TSB	1	Rice	WildType
L1P11A2	AGACGCACTCGGCTAC	AACMGGATTAGATACCCKG	ACGTCATCCCCACCTTCC	AGACGCACTC	GGCTAC	L1	P11	A2	Nippobare	Root	TSB	1	Rice	WildType
L1P11A3	AGCACTGTAGGGCTAC	AACMGGATTAGATACCCKG	ACGTCATCCCCACCTTCC	AGCACTGTAG	GGCTAC	L1	P11	A3	Nippobare	Root	TSB	1	Rice	WildType
L1P11A4	ATCAGACACGGGCTAC	AACMGGATTAGATACCCKG	ACGTCATCCCCACCTTCC	ATCAGACACG	GGCTAC	L1	P11	A4	Nippobare	Root	TSB	1	Rice	WildType
L1P11A5	ATATCGCGAGGGCTAC	AACMGGATTAGATACCCKG	ACGTCATCCCCACCTTCC	ATATCGCGAG	GGCTAC	L1	P11	A5	Nippobare	Root	TSB	1	Rice	WildType
L1P11A6	CACGAGACAGGGCTAC	AACMGGATTAGATACCCKG	ACGTCATCCCCACCTTCC	CACGAGACAG	GGCTAC	L1	P11	A6	Nippobare	Root	TSB	1	Rice	WildType
L1P11A7	CTCGCGTGTCGGCTAC	AACMGGATTAGATACCCKG	ACGTCATCCCCACCTTCC	CTCGCGTGTC	GGCTAC	L1	P11	A7	Nippobare	Root	TSB	1	Rice	WildType
L1P11A8	TAGTATCAGCGGCTAC	AACMGGATTAGATACCCKG	ACGTCATCCCCACCTTCC	TAGTATCAGC	GGCTAC	L1	P11	A8	Nippobare	Root	TSB	1	Rice	WildType
L1P11A9	TCTCTATGCGGGCTAC	AACMGGATTAGATACCCKG	ACGTCATCCCCACCTTCC	TCTCTATGCG	GGCTAC	L1	P11	A9	Nippobare	Root	TSB	1	Rice	WildType
L1P11A10	TGATACGTCTGGCTAC	AACMGGATTAGATACCCKG	ACGTCATCCCCACCTTCC	TGATACGTCT	GGCTAC	L1	P11	A10	Nippobare	Root	TSB	1	Rice	WildType
L1P11A11	TACTGAGCTAGGCTAC	AACMGGATTAGATACCCKG	ACGTCATCCCCACCTTCC	TACTGAGCTA	GGCTAC	L1	P11	A11	Nippobare	Root	TSB	1	Rice	WildType
L1P11A12	CATAGTAGTGGGCTAC	AACMGGATTAGATACCCKG	ACGTCATCCCCACCTTCC	CATAGTAGTG	GGCTAC	L1	P11	A12	Nippobare	Root	TSB	1	Rice	WildType
L1P11B1	CGAGAGATACGGCTAC	AACMGGATTAGATACCCKG	ACGTCATCCCCACCTTCC	CGAGAGATAC	GGCTAC	L1	P11	B1	Nippobare	Root	TSB	1	Rice	WildType
L1P11B2	ATACGACGTAGGCTAC	AACMGGATTAGATACCCKG	ACGTCATCCCCACCTTCC	ATACGACGTA	GGCTAC	L1	P11	B2	Nippobare	Root	TSB	1	Rice	WildType
L1P11B3	TCACGTACTAGGCTAC	AACMGGATTAGATACCCKG	ACGTCATCCCCACCTTCC	TCACGTACTA	GGCTAC	L1	P11	B3	Nippobare	Root	TSB	1	Rice	WildType
L1P11B4	CGTCTAGTACGGCTAC	AACMGGATTAGATACCCKG	ACGTCATCCCCACCTTCC	CGTCTAGTAC	GGCTAC	L1	P11	B4	Nippobare	Root	TSB	1	Rice	WildType
L1P11B5	TCTACGTAGCGGCTAC	AACMGGATTAGATACCCKG	ACGTCATCCCCACCTTCC	TCTACGTAGC	GGCTAC	L1	P11	B5	Nippobare	Root	TSB	1	Rice	WildType
L1P11B6	CACGCGAGTCGGCTAC	AACMGGATTAGATACCCKG	ACGTCATCCCCACCTTCC	CACGCGAGTC	GGCTAC	L1	P11	B6	Nippobare	Root	TSB	1	Rice	WildType
L1P11B7	ACGACTACAGGGCTAC	AACMGGATTAGATACCCKG	ACGTCATCCCCACCTTCC	ACGACTACAG	GGCTAC	L1	P11	B7	Nippobare	Root	TSB	1	Rice	WildType
L1P11B8	CGTAGACTAGGGCTAC	AACMGGATTAGATACCCKG	ACGTCATCCCCACCTTCC	CGTAGACTAG	GGCTAC	L1	P11	B8	Nippobare	Root	TSB	1	Rice	WildType
L1P11B9	TACGAGTATGGGCTAC	AACMGGATTAGATACCCKG	ACGTCATCCCCACCTTCC	TACGAGTATG	GGCTAC	L1	P11	B9	Nippobare	Root	TSB	1	Rice	WildType
L1P11B10	TACTCTCGTGGGCTAC	AACMGGATTAGATACCCKG	ACGTCATCCCCACCTTCC	TACTCTCGTG	GGCTAC	L1	P11	B10	Nippobare	Root	TSB	1	Rice	WildType
L1P11B11	TAGAGACGAGGGCTAC	AACMGGATTAGATACCCKG	ACGTCATCCCCACCTTCC	TAGAGACGAG	GGCTAC	L1	P11	B11	Nippobare	Root	TSB	1	Rice	WildType
L1P11B12	TCGTCGCTCGGGCTAC	AACMGGATTAGATACCCKG	ACGTCATCCCCACCTTCC	TCGTCGCTCG	GGCTAC	L1	P11	B12	Nippobare	Root	TSB	1	Rice	WildType
L1P11C1	ACATACGCGTGGCTAC	AACMGGATTAGATACCCKG	ACGTCATCCCCACCTTCC	ACATACGCGT	GGCTAC	L1	P11	C1	Nippobare	Root	TSB	1	Rice	WildType
L1P11C2	ACGCGAGTATGGCTAC	AACMGGATTAGATACCCKG	ACGTCATCCCCACCTTCC	ACGCGAGTAT	GGCTAC	L1	P11	C2	Nippobare	Root	TSB	1	Rice	WildType
L1P11C3	ACTACTATGTGGCTAC	AACMGGATTAGATACCCKG	ACGTCATCCCCACCTTCC	ACTACTATGT	GGCTAC	L1	P11	C3	Nippobare	Root	TSB	1	Rice	WildType
L1P11C4	ACTGTACAGTGGCTAC	AACMGGATTAGATACCCKG	ACGTCATCCCCACCTTCC	ACTGTACAGT	GGCTAC	L1	P11	C4	Nippobare	Root	TSB	1	Rice	WildType
L1P11C5	AGACTATACTGGCTAC	AACMGGATTAGATACCCKG	ACGTCATCCCCACCTTCC	AGACTATACT	GGCTAC	L1	P11	C5	Nippobare	Root	TSB	1	Rice	WildType
L1P11C6	AGCGTCGTCTGGCTAC	AACMGGATTAGATACCCKG	ACGTCATCCCCACCTTCC	AGCGTCGTCT	GGCTAC	L1	P11	C6	Nippobare	Root	TSB	1	Rice	WildType
L1P11C7	AGTACGCTATGGCTAC	AACMGGATTAGATACCCKG	ACGTCATCCCCACCTTCC	AGTACGCTAT	GGCTAC	L1	P11	C7	Nippobare	Root	TSB	1	Rice	WildType
L1P11C8	CACGCTACGAGGCTAC	AACMGGATTAGATACCCKG	ACGTCATCCCCACCTTCC	CACGCTACGA	GGCTAC	L1	P11	C8	Nippobare	Root	TSB	1	Rice	WildType
L1P11C9	CACGCTACGTGGCTAC	AACMGGATTAGATACCCKG	ACGTCATCCCCACCTTCC	CACGCTACGT	GGCTAC	L1	P11	C9	Nippobare	Root	TSB	1	Rice	WildType
L1P11C10	CAGTAGACGTGGCTAC	AACMGGATTAGATACCCKG	ACGTCATCCCCACCTTCC	CAGTAGACGT	GGCTAC	L1	P11	C10	Nippobare	Root	TSB	1	Rice	WildType
L1P11C11	CGACGTGACTGGCTAC	AACMGGATTAGATACCCKG	ACGTCATCCCCACCTTCC	CGACGTGACT	GGCTAC	L1	P11	C11	Nippobare	Root	TSB	1	Rice	WildType
L1P11C12	CAGTCTCTAGGGCTAC	AACMGGATTAGATACCCKG	ACGTCATCCCCACCTTCC	CAGTCTCTAG	GGCTAC	L1	P11	C12	Nippobare	Root	TSB	1	Rice	WildType
L1P11D1	TACACGTGATGGCTAC	AACMGGATTAGATACCCKG	ACGTCATCCCCACCTTCC	TACACGTGAT	GGCTAC	L1	P11	D1	Nippobare	Root	TSB	1	Rice	WildType
L1P11D2	TACAGATCGTGGCTAC	AACMGGATTAGATACCCKG	ACGTCATCCCCACCTTCC	TACAGATCGT	GGCTAC	L1	P11	D2	Nippobare	Root	TSB	1	Rice	WildType
L1P11D3	TACGCTGTCTGGCTAC	AACMGGATTAGATACCCKG	ACGTCATCCCCACCTTCC	TACGCTGTCT	GGCTAC	L1	P11	D3	Nippobare	Root	TSB	1	Rice	WildType
L1P11D4	TAGTGTAGATGGCTAC	AACMGGATTAGATACCCKG	ACGTCATCCCCACCTTCC	TAGTGTAGAT	GGCTAC	L1	P11	D4	Nippobare	Root	TSB	1	Rice	WildType
L1P11D5	TCGATCACGTGGCTAC	AACMGGATTAGATACCCKG	ACGTCATCCCCACCTTCC	TCGATCACGT	GGCTAC	L1	P11	D5	Nippobare	Root	TSB	1	Rice	WildType
L1P11D6	TCGCACTAGTGGCTAC	AACMGGATTAGATACCCKG	ACGTCATCCCCACCTTCC	TCGCACTAGT	GGCTAC	L1	P11	D6	Nippobare	Root	TSB	1	Rice	WildType
L1P11D7	TCTAGCGACTGGCTAC	AACMGGATTAGATACCCKG	ACGTCATCCCCACCTTCC	TCTAGCGACT	GGCTAC	L1	P11	D7	Nippobare	Root	TSB	1	Rice	WildType
L1P11D8	CACGTGTATAGGCTAC	AACMGGATTAGATACCCKG	ACGTCATCCCCACCTTCC	CACGTGTATA	GGCTAC	L1	P11	D8	Nippobare	Root	TSB	1	Rice	WildType
L1P11D9	TGACGTATGTGGCTAC	AACMGGATTAGATACCCKG	ACGTCATCCCCACCTTCC	TGACGTATGT	GGCTAC	L1	P11	D9	Nippobare	Root	TSB	1	Rice	WildType
L1P11D10	CACTACGATGGGCTAC	AACMGGATTAGATACCCKG	ACGTCATCCCCACCTTCC	CACTACGATG	GGCTAC	L1	P11	D10	Nippobare	Root	TSB	1	Rice	WildType
L1P11D11	ACAGTATATAGGCTAC	AACMGGATTAGATACCCKG	ACGTCATCCCCACCTTCC	ACAGTATATA	GGCTAC	L1	P11	D11	Nippobare	Root	TSB	1	Rice	WildType
L1P11D12	ACGCGATCGAGGCTAC	AACMGGATTAGATACCCKG	ACGTCATCCCCACCTTCC	ACGCGATCGA	GGCTAC	L1	P11	D12	Nippobare	Root	TSB	1	Rice	WildType
L1P11E1	ACTAGCAGTAGGCTAC	AACMGGATTAGATACCCKG	ACGTCATCCCCACCTTCC	ACTAGCAGTA	GGCTAC	L1	P11	E1	Nippobare	Root	TSB	1	Rice	WildType
L1P11E2	AGCTCACGTAGGCTAC	AACMGGATTAGATACCCKG	ACGTCATCCCCACCTTCC	AGCTCACGTA	GGCTAC	L1	P11	E2	Nippobare	Root	TSB	1	Rice	WildType
L1P11E3	AGTATACATAGGCTAC	AACMGGATTAGATACCCKG	ACGTCATCCCCACCTTCC	AGTATACATA	GGCTAC	L1	P11	E3	Nippobare	Root	TSB	1	Rice	WildType
L1P11E4	AGTCGAGAGAGGCTAC	AACMGGATTAGATACCCKG	ACGTCATCCCCACCTTCC	AGTCGAGAGA	GGCTAC	L1	P11	E4	Nippobare	Root	TSB	1	Rice	WildType
L1P11E5	AGTGCTACGAGGCTAC	AACMGGATTAGATACCCKG	ACGTCATCCCCACCTTCC	AGTGCTACGA	GGCTAC	L1	P11	E5	Nippobare	Root	TSB	1	Rice	WildType
L1P11E6	CGATCGTATAGGCTAC	AACMGGATTAGATACCCKG	ACGTCATCCCCACCTTCC	CGATCGTATA	GGCTAC	L1	P11	E6	Nippobare	Root	TSB	1	Rice	WildType
L1P11E7	CGCAGTACGAGGCTAC	AACMGGATTAGATACCCKG	ACGTCATCCCCACCTTCC	CGCAGTACGA	GGCTAC	L1	P11	E7	Nippobare	Root	TSB	1	Rice	WildType
L1P11E8	CGCGTATACAGGCTAC	AACMGGATTAGATACCCKG	ACGTCATCCCCACCTTCC	CGCGTATACA	GGCTAC	L1	P11	E8	Nippobare	Root	TSB	1	Rice	WildType
L1P11E9	CGTACAGTCAGGCTAC	AACMGGATTAGATACCCKG	ACGTCATCCCCACCTTCC	CGTACAGTCA	GGCTAC	L1	P11	E9	Nippobare	Root	TSB	1	Rice	WildType
L1P11E10	CGTACTCAGAGGCTAC	AACMGGATTAGATACCCKG	ACGTCATCCCCACCTTCC	CGTACTCAGA	GGCTAC	L1	P11	E10	Nippobare	Root	TSB	1	Rice	WildType
L1P11E11	CTACGCTCTAGGCTAC	AACMGGATTAGATACCCKG	ACGTCATCCCCACCTTCC	CTACGCTCTA	GGCTAC	L1	P11	E11	Nippobare	Root	TSB	1	Rice	WildType
L1P11E12	CTATAGCGTAGGCTAC	AACMGGATTAGATACCCKG	ACGTCATCCCCACCTTCC	CTATAGCGTA	GGCTAC	L1	P11	E12	Nippobare	Root	TSB	1	Rice	WildType
L1P11F1	TACGTCATCAGGCTAC	AACMGGATTAGATACCCKG	ACGTCATCCCCACCTTCC	TACGTCATCA	GGCTAC	L1	P11	F1	Nippobare	Root	TSB	1	Rice	WildType
L1P11F2	TAGTCGCATAGGCTAC	AACMGGATTAGATACCCKG	ACGTCATCCCCACCTTCC	TAGTCGCATA	GGCTAC	L1	P11	F2	Nippobare	Root	TSB	1	Rice	WildType
L1P11F3	TATATATACAGGCTAC	AACMGGATTAGATACCCKG	ACGTCATCCCCACCTTCC	TATATATACA	GGCTAC	L1	P11	F3	Nippobare	Root	TSB	1	Rice	WildType
L1P11F4	TATGCTAGTAGGCTAC	AACMGGATTAGATACCCKG	ACGTCATCCCCACCTTCC	TATGCTAGTA	GGCTAC	L1	P11	F4	Nippobare	Root	TSB	1	Rice	WildType
L1P11F5	TCACGCGAGAGGCTAC	AACMGGATTAGATACCCKG	ACGTCATCCCCACCTTCC	TCACGCGAGA	GGCTAC	L1	P11	F5	Nippobare	Root	TSB	1	Rice	WildType
L1P11F6	TCGATAGTGAGGCTAC	AACMGGATTAGATACCCKG	ACGTCATCCCCACCTTCC	TCGATAGTGA	GGCTAC	L1	P11	F6	Nippobare	Root	TSB	1	Rice	WildType
L1P11F7	TCGCTGCGTAGGCTAC	AACMGGATTAGATACCCKG	ACGTCATCCCCACCTTCC	TCGCTGCGTA	GGCTAC	L1	P11	F7	Nippobare	Root	TSB	1	Rice	WildType
L1P11F8	TCTGACGTCAGGCTAC	AACMGGATTAGATACCCKG	ACGTCATCCCCACCTTCC	TCTGACGTCA	GGCTAC	L1	P11	F8	Nippobare	Root	TSB	1	Rice	WildType
L1P11F9	TGAGTCAGTAGGCTAC	AACMGGATTAGATACCCKG	ACGTCATCCCCACCTTCC	TGAGTCAGTA	GGCTAC	L1	P11	F9	Nippobare	Root	TSB	1	Rice	WildType
L1P11F10	CACTATACTCGGCTAC	AACMGGATTAGATACCCKG	ACGTCATCCCCACCTTCC	CACTATACTC	GGCTAC	L1	P11	F10	Nippobare	Root	TSB	1	Rice	WildType
L1P11F11	TGTCACACGAGGCTAC	AACMGGATTAGATACCCKG	ACGTCATCCCCACCTTCC	TGTCACACGA	GGCTAC	L1	P11	F11	Nippobare	Root	TSB	1	Rice	WildType
L1P11F12	TGTCGTCGCAGGCTAC	AACMGGATTAGATACCCKG	ACGTCATCCCCACCTTCC	TGTCGTCGCA	GGCTAC	L1	P11	F12	Nippobare	Root	TSB	1	Rice	WildType
L1P11G1	ACACATACGCGGCTAC	AACMGGATTAGATACCCKG	ACGTCATCCCCACCTTCC	ACACATACGC	GGCTAC	L1	P11	G1	Nippobare	Root	TSB	1	Rice	WildType
L1P11G2	ACAGTCGTGCGGCTAC	AACMGGATTAGATACCCKG	ACGTCATCCCCACCTTCC	ACAGTCGTGC	GGCTAC	L1	P11	G2	Nippobare	Root	TSB	1	Rice	WildType
L1P11G3	ACATGACGACGGCTAC	AACMGGATTAGATACCCKG	ACGTCATCCCCACCTTCC	ACATGACGAC	GGCTAC	L1	P11	G3	Nippobare	Root	TSB	1	Rice	WildType
L1P11G4	ACGACAGCTCGGCTAC	AACMGGATTAGATACCCKG	ACGTCATCCCCACCTTCC	ACGACAGCTC	GGCTAC	L1	P11	G4	Nippobare	Root	TSB	1	Rice	WildType
L1P11G5	ACGTCTCATCGGCTAC	AACMGGATTAGATACCCKG	ACGTCATCCCCACCTTCC	ACGTCTCATC	GGCTAC	L1	P11	G5	Nippobare	Root	TSB	1	Rice	WildType
L1P11G6	ACTCATCTACGGCTAC	AACMGGATTAGATACCCKG	ACGTCATCCCCACCTTCC	ACTCATCTAC	GGCTAC	L1	P11	G6	Nippobare	Root	TSB	1	Rice	WildType
L1P11G7	ACTCGCGCACGGCTAC	AACMGGATTAGATACCCKG	ACGTCATCCCCACCTTCC	ACTCGCGCAC	GGCTAC	L1	P11	G7	Nippobare	Root	TSB	1	Rice	WildType
L1P11G8	AGAGCGTCACGGCTAC	AACMGGATTAGATACCCKG	ACGTCATCCCCACCTTCC	AGAGCGTCAC	GGCTAC	L1	P11	G8	Nippobare	Root	TSB	1	Rice	WildType
L1P11G9	AGCGACTAGCGGCTAC	AACMGGATTAGATACCCKG	ACGTCATCCCCACCTTCC	AGCGACTAGC	GGCTAC	L1	P11	G9	Nippobare	Root	TSB	1	Rice	WildType
L1P11G10	CAGCGTACTGGGCTAC	AACMGGATTAGATACCCKG	ACGTCATCCCCACCTTCC	CAGCGTACTG	GGCTAC	L1	P11	G10	Nippobare	Root	TSB	1	Rice	WildType
L1P11G11	AGTGACACACGGCTAC	AACMGGATTAGATACCCKG	ACGTCATCCCCACCTTCC	AGTGACACAC	GGCTAC	L1	P11	G11	Nippobare	Root	TSB	1	Rice	WildType
L1P11G12	AGTGTATGTCGGCTAC	AACMGGATTAGATACCCKG	ACGTCATCCCCACCTTCC	AGTGTATGTC	GGCTAC	L1	P11	G12	Nippobare	Root	TSB	1	Rice	WildType
L1P11H1	ATAGATAGACGGCTAC	AACMGGATTAGATACCCKG	ACGTCATCCCCACCTTCC	ATAGATAGAC	GGCTAC	L1	P11	H1	Nippobare	Root	TSB	1	Rice	WildType
L1P11H2	ATATAGTCGCGGCTAC	AACMGGATTAGATACCCKG	ACGTCATCCCCACCTTCC	ATATAGTCGC	GGCTAC	L1	P11	H2	Nippobare	Root	TSB	1	Rice	WildType
L1P11H3	ATCTACTGACGGCTAC	AACMGGATTAGATACCCKG	ACGTCATCCCCACCTTCC	ATCTACTGAC	GGCTAC	L1	P11	H3	Nippobare	Root	TSB	1	Rice	WildType
L1P11H4	CACGTAGATCGGCTAC	AACMGGATTAGATACCCKG	ACGTCATCCCCACCTTCC	CACGTAGATC	GGCTAC	L1	P11	H4	Nippobare	Root	TSB	1	Rice	WildType
L1P11H5	CACGTCTCGCGGCTAC	AACMGGATTAGATACCCKG	ACGTCATCCCCACCTTCC	CACGTCTCGC	GGCTAC	L1	P11	H5	Nippobare	Root	TSB	1	Rice	WildType
L1P11H6	CATACTCTACGGCTAC	AACMGGATTAGATACCCKG	ACGTCATCCCCACCTTCC	CATACTCTAC	GGCTAC	L1	P11	H6	Nippobare	Root	TSB	1	Rice	WildType
L1P11H7	CGACACTATCGGCTAC	AACMGGATTAGATACCCKG	ACGTCATCCCCACCTTCC	CGACACTATC	GGCTAC	L1	P11	H7	Nippobare	Root	TSB	1	Rice	WildType
L1P11H8	CGAGACGCGCGGCTAC	AACMGGATTAGATACCCKG	ACGTCATCCCCACCTTCC	CGAGACGCGC	GGCTAC	L1	P11	H8	Nippobare	Root	TSB	1	Rice	WildType
L1P11H9	CGTATGCGACGGCTAC	AACMGGATTAGATACCCKG	ACGTCATCCCCACCTTCC	CGTATGCGAC	GGCTAC	L1	P11	H9	Nippobare	Root	TSB	1	Rice	WildType
L1P11H10	CGTCGATCTCGGCTAC	AACMGGATTAGATACCCKG	ACGTCATCCCCACCTTCC	CGTCGATCTC	GGCTAC	L1	P11	H10	Nippobare	Root	TSB	1	Rice	WildType
L1P11H11	CTACGACTGCGGCTAC	AACMGGATTAGATACCCKG	ACGTCATCCCCACCTTCC	CTACGACTGC	GGCTAC	L1	P11	H11	Nippobare	Root	TSB	1	Rice	WildType
L1P11H12	CTAGTCACTCGGCTAC	AACMGGATTAGATACCCKG	ACGTCATCCCCACCTTCC	CTAGTCACTC	GGCTAC	L1	P11	H12	Nippobare	Root	TSB	1	Rice	WildType
L1P12A1	ACGCTCGACACGCGCG	AACMGGATTAGATACCCKG	ACGTCATCCCCACCTTCC	ACGCTCGACA	CGCGCG	L1	P12	A1	Nippobare	Root	TSB	1	Rice	WildType
L1P12A2	AGACGCACTCCGCGCG	AACMGGATTAGATACCCKG	ACGTCATCCCCACCTTCC	AGACGCACTC	CGCGCG	L1	P12	A2	Nippobare	Root	TSB	1	Rice	WildType
L1P12A3	AGCACTGTAGCGCGCG	AACMGGATTAGATACCCKG	ACGTCATCCCCACCTTCC	AGCACTGTAG	CGCGCG	L1	P12	A3	Nippobare	Root	TSB	1	Rice	WildType
L1P12A4	ATCAGACACGCGCGCG	AACMGGATTAGATACCCKG	ACGTCATCCCCACCTTCC	ATCAGACACG	CGCGCG	L1	P12	A4	Nippobare	Root	TSB	1	Rice	WildType
L1P12A5	ATATCGCGAGCGCGCG	AACMGGATTAGATACCCKG	ACGTCATCCCCACCTTCC	ATATCGCGAG	CGCGCG	L1	P12	A5	Nippobare	Root	TSB	1	Rice	WildType
L1P12A6	CACGAGACAGCGCGCG	AACMGGATTAGATACCCKG	ACGTCATCCCCACCTTCC	CACGAGACAG	CGCGCG	L1	P12	A6	Nippobare	Root	TSB	1	Rice	WildType
L1P12A7	CTCGCGTGTCCGCGCG	AACMGGATTAGATACCCKG	ACGTCATCCCCACCTTCC	CTCGCGTGTC	CGCGCG	L1	P12	A7	Nippobare	Root	TSB	1	Rice	WildType
L1P12A8	TAGTATCAGCCGCGCG	AACMGGATTAGATACCCKG	ACGTCATCCCCACCTTCC	TAGTATCAGC	CGCGCG	L1	P12	A8	Nippobare	Root	TSB	1	Rice	WildType
L1P12A9	TCTCTATGCGCGCGCG	AACMGGATTAGATACCCKG	ACGTCATCCCCACCTTCC	TCTCTATGCG	CGCGCG	L1	P12	A9	Nippobare	Root	TSB	1	Rice	WildType
L1P12A10	TGATACGTCTCGCGCG	AACMGGATTAGATACCCKG	ACGTCATCCCCACCTTCC	TGATACGTCT	CGCGCG	L1	P12	A10	Nippobare	Root	TSB	1	Rice	WildType
L1P12A11	TACTGAGCTACGCGCG	AACMGGATTAGATACCCKG	ACGTCATCCCCACCTTCC	TACTGAGCTA	CGCGCG	L1	P12	A11	Nippobare	Root	TSB	1	Rice	WildType
L1P12A12	CATAGTAGTGCGCGCG	AACMGGATTAGATACCCKG	ACGTCATCCCCACCTTCC	CATAGTAGTG	CGCGCG	L1	P12	A12	Nippobare	Root	TSB	1	Rice	WildType
L1P12B1	CGAGAGATACCGCGCG	AACMGGATTAGATACCCKG	ACGTCATCCCCACCTTCC	CGAGAGATAC	CGCGCG	L1	P12	B1	Nippobare	Root	TSB	1	Rice	WildType
L1P12B2	ATACGACGTACGCGCG	AACMGGATTAGATACCCKG	ACGTCATCCCCACCTTCC	ATACGACGTA	CGCGCG	L1	P12	B2	Nippobare	Root	TSB	1	Rice	WildType
L1P12B3	TCACGTACTACGCGCG	AACMGGATTAGATACCCKG	ACGTCATCCCCACCTTCC	TCACGTACTA	CGCGCG	L1	P12	B3	Nippobare	Root	TSB	1	Rice	WildType
L1P12B4	CGTCTAGTACCGCGCG	AACMGGATTAGATACCCKG	ACGTCATCCCCACCTTCC	CGTCTAGTAC	CGCGCG	L1	P12	B4	Nippobare	Root	TSB	1	Rice	WildType
L1P12B5	TCTACGTAGCCGCGCG	AACMGGATTAGATACCCKG	ACGTCATCCCCACCTTCC	TCTACGTAGC	CGCGCG	L1	P12	B5	Nippobare	Root	TSB	1	Rice	WildType
L1P12B6	CACGCGAGTCCGCGCG	AACMGGATTAGATACCCKG	ACGTCATCCCCACCTTCC	CACGCGAGTC	CGCGCG	L1	P12	B6	Nippobare	Root	TSB	1	Rice	WildType
L1P12B7	ACGACTACAGCGCGCG	AACMGGATTAGATACCCKG	ACGTCATCCCCACCTTCC	ACGACTACAG	CGCGCG	L1	P12	B7	Nippobare	Root	TSB	1	Rice	WildType
L1P12B8	CGTAGACTAGCGCGCG	AACMGGATTAGATACCCKG	ACGTCATCCCCACCTTCC	CGTAGACTAG	CGCGCG	L1	P12	B8	Nippobare	Root	TSB	1	Rice	WildType
L1P12B9	TACGAGTATGCGCGCG	AACMGGATTAGATACCCKG	ACGTCATCCCCACCTTCC	TACGAGTATG	CGCGCG	L1	P12	B9	Nippobare	Root	TSB	1	Rice	WildType
L1P12B10	TACTCTCGTGCGCGCG	AACMGGATTAGATACCCKG	ACGTCATCCCCACCTTCC	TACTCTCGTG	CGCGCG	L1	P12	B10	Nippobare	Root	TSB	1	Rice	WildType
L1P12B11	TAGAGACGAGCGCGCG	AACMGGATTAGATACCCKG	ACGTCATCCCCACCTTCC	TAGAGACGAG	CGCGCG	L1	P12	B11	Nippobare	Root	TSB	1	Rice	WildType
L1P12B12	TCGTCGCTCGCGCGCG	AACMGGATTAGATACCCKG	ACGTCATCCCCACCTTCC	TCGTCGCTCG	CGCGCG	L1	P12	B12	Nippobare	Root	TSB	1	Rice	WildType
L1P12C1	ACATACGCGTCGCGCG	AACMGGATTAGATACCCKG	ACGTCATCCCCACCTTCC	ACATACGCGT	CGCGCG	L1	P12	C1	Nippobare	Root	TSB	1	Rice	WildType
L1P12C2	ACGCGAGTATCGCGCG	AACMGGATTAGATACCCKG	ACGTCATCCCCACCTTCC	ACGCGAGTAT	CGCGCG	L1	P12	C2	Nippobare	Root	TSB	1	Rice	WildType
L1P12C3	ACTACTATGTCGCGCG	AACMGGATTAGATACCCKG	ACGTCATCCCCACCTTCC	ACTACTATGT	CGCGCG	L1	P12	C3	Nippobare	Root	TSB	1	Rice	WildType
L1P12C4	ACTGTACAGTCGCGCG	AACMGGATTAGATACCCKG	ACGTCATCCCCACCTTCC	ACTGTACAGT	CGCGCG	L1	P12	C4	Nippobare	Root	TSB	1	Rice	WildType
L1P12C5	AGACTATACTCGCGCG	AACMGGATTAGATACCCKG	ACGTCATCCCCACCTTCC	AGACTATACT	CGCGCG	L1	P12	C5	Nippobare	Root	TSB	1	Rice	WildType
L1P12C6	AGCGTCGTCTCGCGCG	AACMGGATTAGATACCCKG	ACGTCATCCCCACCTTCC	AGCGTCGTCT	CGCGCG	L1	P12	C6	Nippobare	Root	TSB	1	Rice	WildType
L1P12C7	AGTACGCTATCGCGCG	AACMGGATTAGATACCCKG	ACGTCATCCCCACCTTCC	AGTACGCTAT	CGCGCG	L1	P12	C7	Nippobare	Root	TSB	1	Rice	WildType
L1P12C8	CACGCTACGACGCGCG	AACMGGATTAGATACCCKG	ACGTCATCCCCACCTTCC	CACGCTACGA	CGCGCG	L1	P12	C8	Nippobare	Root	TSB	1	Rice	WildType
L1P12C9	CACGCTACGTCGCGCG	AACMGGATTAGATACCCKG	ACGTCATCCCCACCTTCC	CACGCTACGT	CGCGCG	L1	P12	C9	Nippobare	Root	TSB	1	Rice	WildType
L1P12C10	CAGTAGACGTCGCGCG	AACMGGATTAGATACCCKG	ACGTCATCCCCACCTTCC	CAGTAGACGT	CGCGCG	L1	P12	C10	Nippobare	Root	TSB	1	Rice	WildType
L1P12C11	CGACGTGACTCGCGCG	AACMGGATTAGATACCCKG	ACGTCATCCCCACCTTCC	CGACGTGACT	CGCGCG	L1	P12	C11	Nippobare	Root	TSB	1	Rice	WildType
L1P12C12	CAGTCTCTAGCGCGCG	AACMGGATTAGATACCCKG	ACGTCATCCCCACCTTCC	CAGTCTCTAG	CGCGCG	L1	P12	C12	Nippobare	Root	TSB	1	Rice	WildType
L1P12D1	TACACGTGATCGCGCG	AACMGGATTAGATACCCKG	ACGTCATCCCCACCTTCC	TACACGTGAT	CGCGCG	L1	P12	D1	Nippobare	Root	TSB	1	Rice	WildType
L1P12D2	TACAGATCGTCGCGCG	AACMGGATTAGATACCCKG	ACGTCATCCCCACCTTCC	TACAGATCGT	CGCGCG	L1	P12	D2	Nippobare	Root	TSB	1	Rice	WildType
L1P12D3	TACGCTGTCTCGCGCG	AACMGGATTAGATACCCKG	ACGTCATCCCCACCTTCC	TACGCTGTCT	CGCGCG	L1	P12	D3	Nippobare	Root	TSB	1	Rice	WildType
L1P12D4	TAGTGTAGATCGCGCG	AACMGGATTAGATACCCKG	ACGTCATCCCCACCTTCC	TAGTGTAGAT	CGCGCG	L1	P12	D4	Nippobare	Root	TSB	1	Rice	WildType
L1P12D5	TCGATCACGTCGCGCG	AACMGGATTAGATACCCKG	ACGTCATCCCCACCTTCC	TCGATCACGT	CGCGCG	L1	P12	D5	Nippobare	Root	TSB	1	Rice	WildType
L1P12D6	TCGCACTAGTCGCGCG	AACMGGATTAGATACCCKG	ACGTCATCCCCACCTTCC	TCGCACTAGT	CGCGCG	L1	P12	D6	Nippobare	Root	TSB	1	Rice	WildType
L1P12D7	TCTAGCGACTCGCGCG	AACMGGATTAGATACCCKG	ACGTCATCCCCACCTTCC	TCTAGCGACT	CGCGCG	L1	P12	D7	Nippobare	Root	TSB	1	Rice	WildType
L1P12D8	CACGTGTATACGCGCG	AACMGGATTAGATACCCKG	ACGTCATCCCCACCTTCC	CACGTGTATA	CGCGCG	L1	P12	D8	Nippobare	Root	TSB	1	Rice	WildType
L1P12D9	TGACGTATGTCGCGCG	AACMGGATTAGATACCCKG	ACGTCATCCCCACCTTCC	TGACGTATGT	CGCGCG	L1	P12	D9	Nippobare	Root	TSB	1	Rice	WildType
L1P12D10	CACTACGATGCGCGCG	AACMGGATTAGATACCCKG	ACGTCATCCCCACCTTCC	CACTACGATG	CGCGCG	L1	P12	D10	Nippobare	Root	TSB	1	Rice	WildType
L1P12D11	ACAGTATATACGCGCG	AACMGGATTAGATACCCKG	ACGTCATCCCCACCTTCC	ACAGTATATA	CGCGCG	L1	P12	D11	Nippobare	Root	TSB	1	Rice	WildType
L1P12D12	ACGCGATCGACGCGCG	AACMGGATTAGATACCCKG	ACGTCATCCCCACCTTCC	ACGCGATCGA	CGCGCG	L1	P12	D12	Nippobare	Root	TSB	1	Rice	WildType
L1P12E1	ACTAGCAGTACGCGCG	AACMGGATTAGATACCCKG	ACGTCATCCCCACCTTCC	ACTAGCAGTA	CGCGCG	L1	P12	E1	Nippobare	Root	TSB	1	Rice	WildType
L1P12E2	AGCTCACGTACGCGCG	AACMGGATTAGATACCCKG	ACGTCATCCCCACCTTCC	AGCTCACGTA	CGCGCG	L1	P12	E2	Nippobare	Root	TSB	1	Rice	WildType
L1P12E3	AGTATACATACGCGCG	AACMGGATTAGATACCCKG	ACGTCATCCCCACCTTCC	AGTATACATA	CGCGCG	L1	P12	E3	Nippobare	Root	TSB	1	Rice	WildType
L1P12E4	AGTCGAGAGACGCGCG	AACMGGATTAGATACCCKG	ACGTCATCCCCACCTTCC	AGTCGAGAGA	CGCGCG	L1	P12	E4	Nippobare	Root	TSB	1	Rice	WildType
L1P12E5	AGTGCTACGACGCGCG	AACMGGATTAGATACCCKG	ACGTCATCCCCACCTTCC	AGTGCTACGA	CGCGCG	L1	P12	E5	Nippobare	Root	TSB	1	Rice	WildType
L1P12E6	CGATCGTATACGCGCG	AACMGGATTAGATACCCKG	ACGTCATCCCCACCTTCC	CGATCGTATA	CGCGCG	L1	P12	E6	Nippobare	Root	TSB	1	Rice	WildType
L1P12E7	CGCAGTACGACGCGCG	AACMGGATTAGATACCCKG	ACGTCATCCCCACCTTCC	CGCAGTACGA	CGCGCG	L1	P12	E7	Nippobare	Root	TSB	1	Rice	WildType
L1P12E8	CGCGTATACACGCGCG	AACMGGATTAGATACCCKG	ACGTCATCCCCACCTTCC	CGCGTATACA	CGCGCG	L1	P12	E8	Nippobare	Root	TSB	1	Rice	WildType
L1P12E9	CGTACAGTCACGCGCG	AACMGGATTAGATACCCKG	ACGTCATCCCCACCTTCC	CGTACAGTCA	CGCGCG	L1	P12	E9	Nippobare	Root	TSB	1	Rice	WildType
L1P12E10	CGTACTCAGACGCGCG	AACMGGATTAGATACCCKG	ACGTCATCCCCACCTTCC	CGTACTCAGA	CGCGCG	L1	P12	E10	Nippobare	Root	TSB	1	Rice	WildType
L1P12E11	CTACGCTCTACGCGCG	AACMGGATTAGATACCCKG	ACGTCATCCCCACCTTCC	CTACGCTCTA	CGCGCG	L1	P12	E11	Nippobare	Root	TSB	1	Rice	WildType
L1P12E12	CTATAGCGTACGCGCG	AACMGGATTAGATACCCKG	ACGTCATCCCCACCTTCC	CTATAGCGTA	CGCGCG	L1	P12	E12	Nippobare	Root	TSB	1	Rice	WildType
L1P12F1	TACGTCATCACGCGCG	AACMGGATTAGATACCCKG	ACGTCATCCCCACCTTCC	TACGTCATCA	CGCGCG	L1	P12	F1	Nippobare	Root	TSB	1	Rice	WildType
L1P12F2	TAGTCGCATACGCGCG	AACMGGATTAGATACCCKG	ACGTCATCCCCACCTTCC	TAGTCGCATA	CGCGCG	L1	P12	F2	Nippobare	Root	TSB	1	Rice	WildType
L1P12F3	TATATATACACGCGCG	AACMGGATTAGATACCCKG	ACGTCATCCCCACCTTCC	TATATATACA	CGCGCG	L1	P12	F3	Nippobare	Root	TSB	1	Rice	WildType
L1P12F4	TATGCTAGTACGCGCG	AACMGGATTAGATACCCKG	ACGTCATCCCCACCTTCC	TATGCTAGTA	CGCGCG	L1	P12	F4	Nippobare	Root	TSB	1	Rice	WildType
L1P12F5	TCACGCGAGACGCGCG	AACMGGATTAGATACCCKG	ACGTCATCCCCACCTTCC	TCACGCGAGA	CGCGCG	L1	P12	F5	Nippobare	Root	TSB	1	Rice	WildType
L1P12F6	TCGATAGTGACGCGCG	AACMGGATTAGATACCCKG	ACGTCATCCCCACCTTCC	TCGATAGTGA	CGCGCG	L1	P12	F6	Nippobare	Root	TSB	1	Rice	WildType
L1P12F7	TCGCTGCGTACGCGCG	AACMGGATTAGATACCCKG	ACGTCATCCCCACCTTCC	TCGCTGCGTA	CGCGCG	L1	P12	F7	Nippobare	Root	TSB	1	Rice	WildType
L1P12F8	TCTGACGTCACGCGCG	AACMGGATTAGATACCCKG	ACGTCATCCCCACCTTCC	TCTGACGTCA	CGCGCG	L1	P12	F8	Nippobare	Root	TSB	1	Rice	WildType
L1P12F9	TGAGTCAGTACGCGCG	AACMGGATTAGATACCCKG	ACGTCATCCCCACCTTCC	TGAGTCAGTA	CGCGCG	L1	P12	F9	Nippobare	Root	TSB	1	Rice	WildType
L1P12F10	CACTATACTCCGCGCG	AACMGGATTAGATACCCKG	ACGTCATCCCCACCTTCC	CACTATACTC	CGCGCG	L1	P12	F10	Nippobare	Root	TSB	1	Rice	WildType
L1P12F11	TGTCACACGACGCGCG	AACMGGATTAGATACCCKG	ACGTCATCCCCACCTTCC	TGTCACACGA	CGCGCG	L1	P12	F11	Nippobare	Root	TSB	1	Rice	WildType
L1P12F12	TGTCGTCGCACGCGCG	AACMGGATTAGATACCCKG	ACGTCATCCCCACCTTCC	TGTCGTCGCA	CGCGCG	L1	P12	F12	Nippobare	Root	TSB	1	Rice	WildType
L1P12G1	ACACATACGCCGCGCG	AACMGGATTAGATACCCKG	ACGTCATCCCCACCTTCC	ACACATACGC	CGCGCG	L1	P12	G1	Nippobare	Root	TSB	1	Rice	WildType
L1P12G2	ACAGTCGTGCCGCGCG	AACMGGATTAGATACCCKG	ACGTCATCCCCACCTTCC	ACAGTCGTGC	CGCGCG	L1	P12	G2	Nippobare	Root	TSB	1	Rice	WildType
L1P12G3	ACATGACGACCGCGCG	AACMGGATTAGATACCCKG	ACGTCATCCCCACCTTCC	ACATGACGAC	CGCGCG	L1	P12	G3	Nippobare	Root	TSB	1	Rice	WildType
L1P12G4	ACGACAGCTCCGCGCG	AACMGGATTAGATACCCKG	ACGTCATCCCCACCTTCC	ACGACAGCTC	CGCGCG	L1	P12	G4	Nippobare	Root	TSB	1	Rice	WildType
L1P12G5	ACGTCTCATCCGCGCG	AACMGGATTAGATACCCKG	ACGTCATCCCCACCTTCC	ACGTCTCATC	CGCGCG	L1	P12	G5	Nippobare	Root	TSB	1	Rice	WildType
L1P12G6	ACTCATCTACCGCGCG	AACMGGATTAGATACCCKG	ACGTCATCCCCACCTTCC	ACTCATCTAC	CGCGCG	L1	P12	G6	Nippobare	Root	TSB	1	Rice	WildType
L1P12G7	ACTCGCGCACCGCGCG	AACMGGATTAGATACCCKG	ACGTCATCCCCACCTTCC	ACTCGCGCAC	CGCGCG	L1	P12	G7	Nippobare	Root	TSB	1	Rice	WildType
L1P12G8	AGAGCGTCACCGCGCG	AACMGGATTAGATACCCKG	ACGTCATCCCCACCTTCC	AGAGCGTCAC	CGCGCG	L1	P12	G8	Nippobare	Root	TSB	1	Rice	WildType
L1P12G9	AGCGACTAGCCGCGCG	AACMGGATTAGATACCCKG	ACGTCATCCCCACCTTCC	AGCGACTAGC	CGCGCG	L1	P12	G9	Nippobare	Root	TSB	1	Rice	WildType
L1P12G10	CAGCGTACTGCGCGCG	AACMGGATTAGATACCCKG	ACGTCATCCCCACCTTCC	CAGCGTACTG	CGCGCG	L1	P12	G10	Nippobare	Root	TSB	1	Rice	WildType
L1P12G11	AGTGACACACCGCGCG	AACMGGATTAGATACCCKG	ACGTCATCCCCACCTTCC	AGTGACACAC	CGCGCG	L1	P12	G11	Nippobare	Root	TSB	1	Rice	WildType
L1P12G12	AGTGTATGTCCGCGCG	AACMGGATTAGATACCCKG	ACGTCATCCCCACCTTCC	AGTGTATGTC	CGCGCG	L1	P12	G12	Nippobare	Root	TSB	1	Rice	WildType
L1P12H1	ATAGATAGACCGCGCG	AACMGGATTAGATACCCKG	ACGTCATCCCCACCTTCC	ATAGATAGAC	CGCGCG	L1	P12	H1	Nippobare	Root	TSB	1	Rice	WildType
L1P12H2	ATATAGTCGCCGCGCG	AACMGGATTAGATACCCKG	ACGTCATCCCCACCTTCC	ATATAGTCGC	CGCGCG	L1	P12	H2	Nippobare	Root	TSB	1	Rice	WildType
L1P12H3	ATCTACTGACCGCGCG	AACMGGATTAGATACCCKG	ACGTCATCCCCACCTTCC	ATCTACTGAC	CGCGCG	L1	P12	H3	Nippobare	Root	TSB	1	Rice	WildType
L1P12H4	CACGTAGATCCGCGCG	AACMGGATTAGATACCCKG	ACGTCATCCCCACCTTCC	CACGTAGATC	CGCGCG	L1	P12	H4	Nippobare	Root	TSB	1	Rice	WildType
L1P12H5	CACGTCTCGCCGCGCG	AACMGGATTAGATACCCKG	ACGTCATCCCCACCTTCC	CACGTCTCGC	CGCGCG	L1	P12	H5	Nippobare	Root	TSB	1	Rice	WildType
L1P12H6	CATACTCTACCGCGCG	AACMGGATTAGATACCCKG	ACGTCATCCCCACCTTCC	CATACTCTAC	CGCGCG	L1	P12	H6	Nippobare	Root	TSB	1	Rice	WildType
L1P12H7	CGACACTATCCGCGCG	AACMGGATTAGATACCCKG	ACGTCATCCCCACCTTCC	CGACACTATC	CGCGCG	L1	P12	H7	Nippobare	Root	TSB	1	Rice	WildType
L1P12H8	CGAGACGCGCCGCGCG	AACMGGATTAGATACCCKG	ACGTCATCCCCACCTTCC	CGAGACGCGC	CGCGCG	L1	P12	H8	Nippobare	Root	TSB	1	Rice	WildType
L1P12H9	CGTATGCGACCGCGCG	AACMGGATTAGATACCCKG	ACGTCATCCCCACCTTCC	CGTATGCGAC	CGCGCG	L1	P12	H9	Nippobare	Root	TSB	1	Rice	WildType
L1P12H10	CGTCGATCTCCGCGCG	AACMGGATTAGATACCCKG	ACGTCATCCCCACCTTCC	CGTCGATCTC	CGCGCG	L1	P12	H10	Nippobare	Root	TSB	1	Rice	WildType
L1P12H11	CTACGACTGCCGCGCG	AACMGGATTAGATACCCKG	ACGTCATCCCCACCTTCC	CTACGACTGC	CGCGCG	L1	P12	H11	Nippobare	Root	TSB	1	Rice	WildType
L1P12H12	CTAGTCACTCCGCGCG	AACMGGATTAGATACCCKG	ACGTCATCCCCACCTTCC	CTAGTCACTC	CGCGCG	L1	P12	H12	Nippobare	Root	TSB	1	Rice	WildType
L1P13A1	ACGCTCGACAAGTCAA	AACMGGATTAGATACCCKG	ACGTCATCCCCACCTTCC	ACGCTCGACA	AGTCAA	L1	P13	A1	Nippobare	Root	TSB	1	Rice	WildType
L1P13A2	AGACGCACTCAGTCAA	AACMGGATTAGATACCCKG	ACGTCATCCCCACCTTCC	AGACGCACTC	AGTCAA	L1	P13	A2	Nippobare	Root	TSB	1	Rice	WildType
L1P13A3	AGCACTGTAGAGTCAA	AACMGGATTAGATACCCKG	ACGTCATCCCCACCTTCC	AGCACTGTAG	AGTCAA	L1	P13	A3	Nippobare	Root	TSB	1	Rice	WildType
L1P13A4	ATCAGACACGAGTCAA	AACMGGATTAGATACCCKG	ACGTCATCCCCACCTTCC	ATCAGACACG	AGTCAA	L1	P13	A4	Nippobare	Root	TSB	1	Rice	WildType
L1P13A5	ATATCGCGAGAGTCAA	AACMGGATTAGATACCCKG	ACGTCATCCCCACCTTCC	ATATCGCGAG	AGTCAA	L1	P13	A5	Nippobare	Root	TSB	1	Rice	WildType
L1P13A6	CACGAGACAGAGTCAA	AACMGGATTAGATACCCKG	ACGTCATCCCCACCTTCC	CACGAGACAG	AGTCAA	L1	P13	A6	Nippobare	Root	TSB	1	Rice	WildType
L1P13A7	CTCGCGTGTCAGTCAA	AACMGGATTAGATACCCKG	ACGTCATCCCCACCTTCC	CTCGCGTGTC	AGTCAA	L1	P13	A7	Nippobare	Root	TSB	1	Rice	WildType
L1P13A8	TAGTATCAGCAGTCAA	AACMGGATTAGATACCCKG	ACGTCATCCCCACCTTCC	TAGTATCAGC	AGTCAA	L1	P13	A8	Nippobare	Root	TSB	1	Rice	WildType
L1P13A9	TCTCTATGCGAGTCAA	AACMGGATTAGATACCCKG	ACGTCATCCCCACCTTCC	TCTCTATGCG	AGTCAA	L1	P13	A9	Nippobare	Root	TSB	1	Rice	WildType
L1P13A10	TGATACGTCTAGTCAA	AACMGGATTAGATACCCKG	ACGTCATCCCCACCTTCC	TGATACGTCT	AGTCAA	L1	P13	A10	Nippobare	Root	TSB	1	Rice	WildType
L1P13A11	TACTGAGCTAAGTCAA	AACMGGATTAGATACCCKG	ACGTCATCCCCACCTTCC	TACTGAGCTA	AGTCAA	L1	P13	A11	Nippobare	Root	TSB	1	Rice	WildType
L1P13A12	CATAGTAGTGAGTCAA	AACMGGATTAGATACCCKG	ACGTCATCCCCACCTTCC	CATAGTAGTG	AGTCAA	L1	P13	A12	Nippobare	Root	TSB	1	Rice	WildType
L1P13B1	CGAGAGATACAGTCAA	AACMGGATTAGATACCCKG	ACGTCATCCCCACCTTCC	CGAGAGATAC	AGTCAA	L1	P13	B1	Nippobare	Root	TSB	1	Rice	WildType
L1P13B2	ATACGACGTAAGTCAA	AACMGGATTAGATACCCKG	ACGTCATCCCCACCTTCC	ATACGACGTA	AGTCAA	L1	P13	B2	Nippobare	Root	TSB	1	Rice	WildType
L1P13B3	TCACGTACTAAGTCAA	AACMGGATTAGATACCCKG	ACGTCATCCCCACCTTCC	TCACGTACTA	AGTCAA	L1	P13	B3	Nippobare	Root	TSB	1	Rice	WildType
L1P13B4	CGTCTAGTACAGTCAA	AACMGGATTAGATACCCKG	ACGTCATCCCCACCTTCC	CGTCTAGTAC	AGTCAA	L1	P13	B4	Nippobare	Root	TSB	1	Rice	WildType
L1P13B5	TCTACGTAGCAGTCAA	AACMGGATTAGATACCCKG	ACGTCATCCCCACCTTCC	TCTACGTAGC	AGTCAA	L1	P13	B5	Nippobare	Root	TSB	1	Rice	WildType
L1P13B6	CACGCGAGTCAGTCAA	AACMGGATTAGATACCCKG	ACGTCATCCCCACCTTCC	CACGCGAGTC	AGTCAA	L1	P13	B6	Nippobare	Root	TSB	1	Rice	WildType
L1P13B7	ACGACTACAGAGTCAA	AACMGGATTAGATACCCKG	ACGTCATCCCCACCTTCC	ACGACTACAG	AGTCAA	L1	P13	B7	Nippobare	Root	TSB	1	Rice	WildType
L1P13B8	CGTAGACTAGAGTCAA	AACMGGATTAGATACCCKG	ACGTCATCCCCACCTTCC	CGTAGACTAG	AGTCAA	L1	P13	B8	Nippobare	Root	TSB	1	Rice	WildType
L1P13B9	TACGAGTATGAGTCAA	AACMGGATTAGATACCCKG	ACGTCATCCCCACCTTCC	TACGAGTATG	AGTCAA	L1	P13	B9	Nippobare	Root	TSB	1	Rice	WildType
L1P13B10	TACTCTCGTGAGTCAA	AACMGGATTAGATACCCKG	ACGTCATCCCCACCTTCC	TACTCTCGTG	AGTCAA	L1	P13	B10	Nippobare	Root	TSB	1	Rice	WildType
L1P13B11	TAGAGACGAGAGTCAA	AACMGGATTAGATACCCKG	ACGTCATCCCCACCTTCC	TAGAGACGAG	AGTCAA	L1	P13	B11	Nippobare	Root	TSB	1	Rice	WildType
L1P13B12	TCGTCGCTCGAGTCAA	AACMGGATTAGATACCCKG	ACGTCATCCCCACCTTCC	TCGTCGCTCG	AGTCAA	L1	P13	B12	Nippobare	Root	TSB	1	Rice	WildType
L1P13C1	ACATACGCGTAGTCAA	AACMGGATTAGATACCCKG	ACGTCATCCCCACCTTCC	ACATACGCGT	AGTCAA	L1	P13	C1	Nippobare	Root	TSB	1	Rice	WildType
L1P13C2	ACGCGAGTATAGTCAA	AACMGGATTAGATACCCKG	ACGTCATCCCCACCTTCC	ACGCGAGTAT	AGTCAA	L1	P13	C2	Nippobare	Root	TSB	1	Rice	WildType
L1P13C3	ACTACTATGTAGTCAA	AACMGGATTAGATACCCKG	ACGTCATCCCCACCTTCC	ACTACTATGT	AGTCAA	L1	P13	C3	Nippobare	Root	TSB	1	Rice	WildType
L1P13C4	ACTGTACAGTAGTCAA	AACMGGATTAGATACCCKG	ACGTCATCCCCACCTTCC	ACTGTACAGT	AGTCAA	L1	P13	C4	Nippobare	Root	TSB	1	Rice	WildType
L1P13C5	AGACTATACTAGTCAA	AACMGGATTAGATACCCKG	ACGTCATCCCCACCTTCC	AGACTATACT	AGTCAA	L1	P13	C5	Nippobare	Root	TSB	1	Rice	WildType
L1P13C6	AGCGTCGTCTAGTCAA	AACMGGATTAGATACCCKG	ACGTCATCCCCACCTTCC	AGCGTCGTCT	AGTCAA	L1	P13	C6	Nippobare	Root	TSB	1	Rice	WildType
L1P13C7	AGTACGCTATAGTCAA	AACMGGATTAGATACCCKG	ACGTCATCCCCACCTTCC	AGTACGCTAT	AGTCAA	L1	P13	C7	Nippobare	Root	TSB	1	Rice	WildType
L1P13C8	CACGCTACGAAGTCAA	AACMGGATTAGATACCCKG	ACGTCATCCCCACCTTCC	CACGCTACGA	AGTCAA	L1	P13	C8	Nippobare	Root	TSB	1	Rice	WildType
L1P13C9	CACGCTACGTAGTCAA	AACMGGATTAGATACCCKG	ACGTCATCCCCACCTTCC	CACGCTACGT	AGTCAA	L1	P13	C9	Nippobare	Root	TSB	1	Rice	WildType
L1P13C10	CAGTAGACGTAGTCAA	AACMGGATTAGATACCCKG	ACGTCATCCCCACCTTCC	CAGTAGACGT	AGTCAA	L1	P13	C10	Nippobare	Root	TSB	1	Rice	WildType
L1P13C11	CGACGTGACTAGTCAA	AACMGGATTAGATACCCKG	ACGTCATCCCCACCTTCC	CGACGTGACT	AGTCAA	L1	P13	C11	Nippobare	Root	TSB	1	Rice	WildType
L1P13C12	CAGTCTCTAGAGTCAA	AACMGGATTAGATACCCKG	ACGTCATCCCCACCTTCC	CAGTCTCTAG	AGTCAA	L1	P13	C12	Nippobare	Root	TSB	1	Rice	WildType
L1P13D1	TACACGTGATAGTCAA	AACMGGATTAGATACCCKG	ACGTCATCCCCACCTTCC	TACACGTGAT	AGTCAA	L1	P13	D1	Nippobare	Root	TSB	1	Rice	WildType
L1P13D2	TACAGATCGTAGTCAA	AACMGGATTAGATACCCKG	ACGTCATCCCCACCTTCC	TACAGATCGT	AGTCAA	L1	P13	D2	Nippobare	Root	TSB	1	Rice	WildType
L1P13D3	TACGCTGTCTAGTCAA	AACMGGATTAGATACCCKG	ACGTCATCCCCACCTTCC	TACGCTGTCT	AGTCAA	L1	P13	D3	Nippobare	Root	TSB	1	Rice	WildType
L1P13D4	TAGTGTAGATAGTCAA	AACMGGATTAGATACCCKG	ACGTCATCCCCACCTTCC	TAGTGTAGAT	AGTCAA	L1	P13	D4	Nippobare	Root	TSB	1	Rice	WildType
L1P13D5	TCGATCACGTAGTCAA	AACMGGATTAGATACCCKG	ACGTCATCCCCACCTTCC	TCGATCACGT	AGTCAA	L1	P13	D5	Nippobare	Root	TSB	1	Rice	WildType
L1P13D6	TCGCACTAGTAGTCAA	AACMGGATTAGATACCCKG	ACGTCATCCCCACCTTCC	TCGCACTAGT	AGTCAA	L1	P13	D6	Nippobare	Root	TSB	1	Rice	WildType
L1P13D7	TCTAGCGACTAGTCAA	AACMGGATTAGATACCCKG	ACGTCATCCCCACCTTCC	TCTAGCGACT	AGTCAA	L1	P13	D7	Nippobare	Root	TSB	1	Rice	WildType
L1P13D8	CACGTGTATAAGTCAA	AACMGGATTAGATACCCKG	ACGTCATCCCCACCTTCC	CACGTGTATA	AGTCAA	L1	P13	D8	Nippobare	Root	TSB	1	Rice	WildType
L1P13D9	TGACGTATGTAGTCAA	AACMGGATTAGATACCCKG	ACGTCATCCCCACCTTCC	TGACGTATGT	AGTCAA	L1	P13	D9	Nippobare	Root	TSB	1	Rice	WildType
L1P13D10	CACTACGATGAGTCAA	AACMGGATTAGATACCCKG	ACGTCATCCCCACCTTCC	CACTACGATG	AGTCAA	L1	P13	D10	Nippobare	Root	TSB	1	Rice	WildType
L1P13D11	ACAGTATATAAGTCAA	AACMGGATTAGATACCCKG	ACGTCATCCCCACCTTCC	ACAGTATATA	AGTCAA	L1	P13	D11	Nippobare	Root	TSB	1	Rice	WildType
L1P13D12	ACGCGATCGAAGTCAA	AACMGGATTAGATACCCKG	ACGTCATCCCCACCTTCC	ACGCGATCGA	AGTCAA	L1	P13	D12	Nippobare	Root	TSB	1	Rice	WildType
L1P13E1	ACTAGCAGTAAGTCAA	AACMGGATTAGATACCCKG	ACGTCATCCCCACCTTCC	ACTAGCAGTA	AGTCAA	L1	P13	E1	Nippobare	Root	TSB	1	Rice	WildType
L1P13E2	AGCTCACGTAAGTCAA	AACMGGATTAGATACCCKG	ACGTCATCCCCACCTTCC	AGCTCACGTA	AGTCAA	L1	P13	E2	Nippobare	Root	TSB	1	Rice	WildType
L1P13E3	AGTATACATAAGTCAA	AACMGGATTAGATACCCKG	ACGTCATCCCCACCTTCC	AGTATACATA	AGTCAA	L1	P13	E3	Nippobare	Root	TSB	1	Rice	WildType
L1P13E4	AGTCGAGAGAAGTCAA	AACMGGATTAGATACCCKG	ACGTCATCCCCACCTTCC	AGTCGAGAGA	AGTCAA	L1	P13	E4	Nippobare	Root	TSB	1	Rice	WildType
L1P13E5	AGTGCTACGAAGTCAA	AACMGGATTAGATACCCKG	ACGTCATCCCCACCTTCC	AGTGCTACGA	AGTCAA	L1	P13	E5	Nippobare	Root	TSB	1	Rice	WildType
L1P13E6	CGATCGTATAAGTCAA	AACMGGATTAGATACCCKG	ACGTCATCCCCACCTTCC	CGATCGTATA	AGTCAA	L1	P13	E6	Nippobare	Root	TSB	1	Rice	WildType
L1P13E7	CGCAGTACGAAGTCAA	AACMGGATTAGATACCCKG	ACGTCATCCCCACCTTCC	CGCAGTACGA	AGTCAA	L1	P13	E7	Nippobare	Root	TSB	1	Rice	WildType
L1P13E8	CGCGTATACAAGTCAA	AACMGGATTAGATACCCKG	ACGTCATCCCCACCTTCC	CGCGTATACA	AGTCAA	L1	P13	E8	Nippobare	Root	TSB	1	Rice	WildType
L1P13E9	CGTACAGTCAAGTCAA	AACMGGATTAGATACCCKG	ACGTCATCCCCACCTTCC	CGTACAGTCA	AGTCAA	L1	P13	E9	Nippobare	Root	TSB	1	Rice	WildType
L1P13E10	CGTACTCAGAAGTCAA	AACMGGATTAGATACCCKG	ACGTCATCCCCACCTTCC	CGTACTCAGA	AGTCAA	L1	P13	E10	Nippobare	Root	TSB	1	Rice	WildType
L1P13E11	CTACGCTCTAAGTCAA	AACMGGATTAGATACCCKG	ACGTCATCCCCACCTTCC	CTACGCTCTA	AGTCAA	L1	P13	E11	Nippobare	Root	TSB	1	Rice	WildType
L1P13E12	CTATAGCGTAAGTCAA	AACMGGATTAGATACCCKG	ACGTCATCCCCACCTTCC	CTATAGCGTA	AGTCAA	L1	P13	E12	Nippobare	Root	TSB	1	Rice	WildType
L1P13F1	TACGTCATCAAGTCAA	AACMGGATTAGATACCCKG	ACGTCATCCCCACCTTCC	TACGTCATCA	AGTCAA	L1	P13	F1	Nippobare	Root	TSB	1	Rice	WildType
L1P13F2	TAGTCGCATAAGTCAA	AACMGGATTAGATACCCKG	ACGTCATCCCCACCTTCC	TAGTCGCATA	AGTCAA	L1	P13	F2	Nippobare	Root	TSB	1	Rice	WildType
L1P13F3	TATATATACAAGTCAA	AACMGGATTAGATACCCKG	ACGTCATCCCCACCTTCC	TATATATACA	AGTCAA	L1	P13	F3	Nippobare	Root	TSB	1	Rice	WildType
L1P13F4	TATGCTAGTAAGTCAA	AACMGGATTAGATACCCKG	ACGTCATCCCCACCTTCC	TATGCTAGTA	AGTCAA	L1	P13	F4	Nippobare	Root	TSB	1	Rice	WildType
L1P13F5	TCACGCGAGAAGTCAA	AACMGGATTAGATACCCKG	ACGTCATCCCCACCTTCC	TCACGCGAGA	AGTCAA	L1	P13	F5	Nippobare	Root	TSB	1	Rice	WildType
L1P13F6	TCGATAGTGAAGTCAA	AACMGGATTAGATACCCKG	ACGTCATCCCCACCTTCC	TCGATAGTGA	AGTCAA	L1	P13	F6	Nippobare	Root	TSB	1	Rice	WildType
L1P13F7	TCGCTGCGTAAGTCAA	AACMGGATTAGATACCCKG	ACGTCATCCCCACCTTCC	TCGCTGCGTA	AGTCAA	L1	P13	F7	Nippobare	Root	TSB	1	Rice	WildType
L1P13F8	TCTGACGTCAAGTCAA	AACMGGATTAGATACCCKG	ACGTCATCCCCACCTTCC	TCTGACGTCA	AGTCAA	L1	P13	F8	Nippobare	Root	TSB	1	Rice	WildType
L1P13F9	TGAGTCAGTAAGTCAA	AACMGGATTAGATACCCKG	ACGTCATCCCCACCTTCC	TGAGTCAGTA	AGTCAA	L1	P13	F9	Nippobare	Root	TSB	1	Rice	WildType
L1P13F10	CACTATACTCAGTCAA	AACMGGATTAGATACCCKG	ACGTCATCCCCACCTTCC	CACTATACTC	AGTCAA	L1	P13	F10	Nippobare	Root	TSB	1	Rice	WildType
L1P13F11	TGTCACACGAAGTCAA	AACMGGATTAGATACCCKG	ACGTCATCCCCACCTTCC	TGTCACACGA	AGTCAA	L1	P13	F11	Nippobare	Root	TSB	1	Rice	WildType
L1P13F12	TGTCGTCGCAAGTCAA	AACMGGATTAGATACCCKG	ACGTCATCCCCACCTTCC	TGTCGTCGCA	AGTCAA	L1	P13	F12	Nippobare	Root	TSB	1	Rice	WildType
L1P13G1	ACACATACGCAGTCAA	AACMGGATTAGATACCCKG	ACGTCATCCCCACCTTCC	ACACATACGC	AGTCAA	L1	P13	G1	Nippobare	Root	TSB	1	Rice	WildType
L1P13G2	ACAGTCGTGCAGTCAA	AACMGGATTAGATACCCKG	ACGTCATCCCCACCTTCC	ACAGTCGTGC	AGTCAA	L1	P13	G2	Nippobare	Root	TSB	1	Rice	WildType
L1P13G3	ACATGACGACAGTCAA	AACMGGATTAGATACCCKG	ACGTCATCCCCACCTTCC	ACATGACGAC	AGTCAA	L1	P13	G3	Nippobare	Root	TSB	1	Rice	WildType
L1P13G4	ACGACAGCTCAGTCAA	AACMGGATTAGATACCCKG	ACGTCATCCCCACCTTCC	ACGACAGCTC	AGTCAA	L1	P13	G4	Nippobare	Root	TSB	1	Rice	WildType
L1P13G5	ACGTCTCATCAGTCAA	AACMGGATTAGATACCCKG	ACGTCATCCCCACCTTCC	ACGTCTCATC	AGTCAA	L1	P13	G5	Nippobare	Root	TSB	1	Rice	WildType
L1P13G6	ACTCATCTACAGTCAA	AACMGGATTAGATACCCKG	ACGTCATCCCCACCTTCC	ACTCATCTAC	AGTCAA	L1	P13	G6	Nippobare	Root	TSB	1	Rice	WildType
L1P13G7	ACTCGCGCACAGTCAA	AACMGGATTAGATACCCKG	ACGTCATCCCCACCTTCC	ACTCGCGCAC	AGTCAA	L1	P13	G7	Nippobare	Root	TSB	1	Rice	WildType
L1P13G8	AGAGCGTCACAGTCAA	AACMGGATTAGATACCCKG	ACGTCATCCCCACCTTCC	AGAGCGTCAC	AGTCAA	L1	P13	G8	Nippobare	Root	TSB	1	Rice	WildType
L1P13G9	AGCGACTAGCAGTCAA	AACMGGATTAGATACCCKG	ACGTCATCCCCACCTTCC	AGCGACTAGC	AGTCAA	L1	P13	G9	Nippobare	Root	TSB	1	Rice	WildType
L1P13G10	CAGCGTACTGAGTCAA	AACMGGATTAGATACCCKG	ACGTCATCCCCACCTTCC	CAGCGTACTG	AGTCAA	L1	P13	G10	Nippobare	Root	TSB	1	Rice	WildType
L1P13G11	AGTGACACACAGTCAA	AACMGGATTAGATACCCKG	ACGTCATCCCCACCTTCC	AGTGACACAC	AGTCAA	L1	P13	G11	Nippobare	Root	TSB	1	Rice	WildType
L1P13G12	AGTGTATGTCAGTCAA	AACMGGATTAGATACCCKG	ACGTCATCCCCACCTTCC	AGTGTATGTC	AGTCAA	L1	P13	G12	Nippobare	Root	TSB	1	Rice	WildType
L1P13H1	ATAGATAGACAGTCAA	AACMGGATTAGATACCCKG	ACGTCATCCCCACCTTCC	ATAGATAGAC	AGTCAA	L1	P13	H1	Nippobare	Root	TSB	1	Rice	WildType
L1P13H2	ATATAGTCGCAGTCAA	AACMGGATTAGATACCCKG	ACGTCATCCCCACCTTCC	ATATAGTCGC	AGTCAA	L1	P13	H2	Nippobare	Root	TSB	1	Rice	WildType
L1P13H3	ATCTACTGACAGTCAA	AACMGGATTAGATACCCKG	ACGTCATCCCCACCTTCC	ATCTACTGAC	AGTCAA	L1	P13	H3	Nippobare	Root	TSB	1	Rice	WildType
L1P13H4	CACGTAGATCAGTCAA	AACMGGATTAGATACCCKG	ACGTCATCCCCACCTTCC	CACGTAGATC	AGTCAA	L1	P13	H4	Nippobare	Root	TSB	1	Rice	WildType
L1P13H5	CACGTCTCGCAGTCAA	AACMGGATTAGATACCCKG	ACGTCATCCCCACCTTCC	CACGTCTCGC	AGTCAA	L1	P13	H5	Nippobare	Root	TSB	1	Rice	WildType
L1P13H6	CATACTCTACAGTCAA	AACMGGATTAGATACCCKG	ACGTCATCCCCACCTTCC	CATACTCTAC	AGTCAA	L1	P13	H6	Nippobare	Root	TSB	1	Rice	WildType
L1P13H7	CGACACTATCAGTCAA	AACMGGATTAGATACCCKG	ACGTCATCCCCACCTTCC	CGACACTATC	AGTCAA	L1	P13	H7	Nippobare	Root	TSB	1	Rice	WildType
L1P13H8	CGAGACGCGCAGTCAA	AACMGGATTAGATACCCKG	ACGTCATCCCCACCTTCC	CGAGACGCGC	AGTCAA	L1	P13	H8	Nippobare	Root	TSB	1	Rice	WildType
L1P13H9	CGTATGCGACAGTCAA	AACMGGATTAGATACCCKG	ACGTCATCCCCACCTTCC	CGTATGCGAC	AGTCAA	L1	P13	H9	Nippobare	Root	TSB	1	Rice	WildType
L1P13H10	CGTCGATCTCAGTCAA	AACMGGATTAGATACCCKG	ACGTCATCCCCACCTTCC	CGTCGATCTC	AGTCAA	L1	P13	H10	Nippobare	Root	TSB	1	Rice	WildType
L1P13H11	CTACGACTGCAGTCAA	AACMGGATTAGATACCCKG	ACGTCATCCCCACCTTCC	CTACGACTGC	AGTCAA	L1	P13	H11	Nippobare	Root	TSB	1	Rice	WildType
L1P13H12	CTAGTCACTCAGTCAA	AACMGGATTAGATACCCKG	ACGTCATCCCCACCTTCC	CTAGTCACTC	AGTCAA	L1	P13	H12	Nippobare	Root	TSB	1	Rice	WildType
L1P14A1	ACGCTCGACAAGTTCC	AACMGGATTAGATACCCKG	ACGTCATCCCCACCTTCC	ACGCTCGACA	AGTTCC	L1	P14	A1	Nippobare	Root	TSB	1	Rice	WildType
L1P14A2	AGACGCACTCAGTTCC	AACMGGATTAGATACCCKG	ACGTCATCCCCACCTTCC	AGACGCACTC	AGTTCC	L1	P14	A2	Nippobare	Root	TSB	1	Rice	WildType
L1P14A3	AGCACTGTAGAGTTCC	AACMGGATTAGATACCCKG	ACGTCATCCCCACCTTCC	AGCACTGTAG	AGTTCC	L1	P14	A3	Nippobare	Root	TSB	1	Rice	WildType
L1P14A4	ATCAGACACGAGTTCC	AACMGGATTAGATACCCKG	ACGTCATCCCCACCTTCC	ATCAGACACG	AGTTCC	L1	P14	A4	Nippobare	Root	TSB	1	Rice	WildType
L1P14A5	ATATCGCGAGAGTTCC	AACMGGATTAGATACCCKG	ACGTCATCCCCACCTTCC	ATATCGCGAG	AGTTCC	L1	P14	A5	Nippobare	Root	TSB	1	Rice	WildType
L1P14A6	CACGAGACAGAGTTCC	AACMGGATTAGATACCCKG	ACGTCATCCCCACCTTCC	CACGAGACAG	AGTTCC	L1	P14	A6	Nippobare	Root	TSB	1	Rice	WildType
L1P14A7	CTCGCGTGTCAGTTCC	AACMGGATTAGATACCCKG	ACGTCATCCCCACCTTCC	CTCGCGTGTC	AGTTCC	L1	P14	A7	Nippobare	Root	TSB	1	Rice	WildType
L1P14A8	TAGTATCAGCAGTTCC	AACMGGATTAGATACCCKG	ACGTCATCCCCACCTTCC	TAGTATCAGC	AGTTCC	L1	P14	A8	Nippobare	Root	TSB	1	Rice	WildType
L1P14A9	TCTCTATGCGAGTTCC	AACMGGATTAGATACCCKG	ACGTCATCCCCACCTTCC	TCTCTATGCG	AGTTCC	L1	P14	A9	Nippobare	Root	TSB	1	Rice	WildType
L1P14A10	TGATACGTCTAGTTCC	AACMGGATTAGATACCCKG	ACGTCATCCCCACCTTCC	TGATACGTCT	AGTTCC	L1	P14	A10	Nippobare	Root	TSB	1	Rice	WildType
L1P14A11	TACTGAGCTAAGTTCC	AACMGGATTAGATACCCKG	ACGTCATCCCCACCTTCC	TACTGAGCTA	AGTTCC	L1	P14	A11	Nippobare	Root	TSB	1	Rice	WildType
L1P14A12	CATAGTAGTGAGTTCC	AACMGGATTAGATACCCKG	ACGTCATCCCCACCTTCC	CATAGTAGTG	AGTTCC	L1	P14	A12	Nippobare	Root	TSB	1	Rice	WildType
L1P14B1	CGAGAGATACAGTTCC	AACMGGATTAGATACCCKG	ACGTCATCCCCACCTTCC	CGAGAGATAC	AGTTCC	L1	P14	B1	Nippobare	Root	TSB	1	Rice	WildType
L1P14B2	ATACGACGTAAGTTCC	AACMGGATTAGATACCCKG	ACGTCATCCCCACCTTCC	ATACGACGTA	AGTTCC	L1	P14	B2	Nippobare	Root	TSB	1	Rice	WildType
L1P14B3	TCACGTACTAAGTTCC	AACMGGATTAGATACCCKG	ACGTCATCCCCACCTTCC	TCACGTACTA	AGTTCC	L1	P14	B3	Nippobare	Root	TSB	1	Rice	WildType
L1P14B4	CGTCTAGTACAGTTCC	AACMGGATTAGATACCCKG	ACGTCATCCCCACCTTCC	CGTCTAGTAC	AGTTCC	L1	P14	B4	Nippobare	Root	TSB	1	Rice	WildType
L1P14B5	TCTACGTAGCAGTTCC	AACMGGATTAGATACCCKG	ACGTCATCCCCACCTTCC	TCTACGTAGC	AGTTCC	L1	P14	B5	Nippobare	Root	TSB	1	Rice	WildType
L1P14B6	CACGCGAGTCAGTTCC	AACMGGATTAGATACCCKG	ACGTCATCCCCACCTTCC	CACGCGAGTC	AGTTCC	L1	P14	B6	Nippobare	Root	TSB	1	Rice	WildType
L1P14B7	ACGACTACAGAGTTCC	AACMGGATTAGATACCCKG	ACGTCATCCCCACCTTCC	ACGACTACAG	AGTTCC	L1	P14	B7	Nippobare	Root	TSB	1	Rice	WildType
L1P14B8	CGTAGACTAGAGTTCC	AACMGGATTAGATACCCKG	ACGTCATCCCCACCTTCC	CGTAGACTAG	AGTTCC	L1	P14	B8	Nippobare	Root	TSB	1	Rice	WildType
L1P14B9	TACGAGTATGAGTTCC	AACMGGATTAGATACCCKG	ACGTCATCCCCACCTTCC	TACGAGTATG	AGTTCC	L1	P14	B9	Nippobare	Root	TSB	1	Rice	WildType
L1P14B10	TACTCTCGTGAGTTCC	AACMGGATTAGATACCCKG	ACGTCATCCCCACCTTCC	TACTCTCGTG	AGTTCC	L1	P14	B10	Nippobare	Root	TSB	1	Rice	WildType
L1P14B11	TAGAGACGAGAGTTCC	AACMGGATTAGATACCCKG	ACGTCATCCCCACCTTCC	TAGAGACGAG	AGTTCC	L1	P14	B11	Nippobare	Root	TSB	1	Rice	WildType
L1P14B12	TCGTCGCTCGAGTTCC	AACMGGATTAGATACCCKG	ACGTCATCCCCACCTTCC	TCGTCGCTCG	AGTTCC	L1	P14	B12	Nippobare	Root	TSB	1	Rice	WildType
L1P14C1	ACATACGCGTAGTTCC	AACMGGATTAGATACCCKG	ACGTCATCCCCACCTTCC	ACATACGCGT	AGTTCC	L1	P14	C1	Nippobare	Root	TSB	1	Rice	WildType
L1P14C2	ACGCGAGTATAGTTCC	AACMGGATTAGATACCCKG	ACGTCATCCCCACCTTCC	ACGCGAGTAT	AGTTCC	L1	P14	C2	Nippobare	Root	TSB	1	Rice	WildType
L1P14C3	ACTACTATGTAGTTCC	AACMGGATTAGATACCCKG	ACGTCATCCCCACCTTCC	ACTACTATGT	AGTTCC	L1	P14	C3	Nippobare	Root	TSB	1	Rice	WildType
L1P14C4	ACTGTACAGTAGTTCC	AACMGGATTAGATACCCKG	ACGTCATCCCCACCTTCC	ACTGTACAGT	AGTTCC	L1	P14	C4	Nippobare	Root	TSB	1	Rice	WildType
L1P14C5	AGACTATACTAGTTCC	AACMGGATTAGATACCCKG	ACGTCATCCCCACCTTCC	AGACTATACT	AGTTCC	L1	P14	C5	Nippobare	Root	TSB	1	Rice	WildType
L1P14C6	AGCGTCGTCTAGTTCC	AACMGGATTAGATACCCKG	ACGTCATCCCCACCTTCC	AGCGTCGTCT	AGTTCC	L1	P14	C6	Nippobare	Root	TSB	1	Rice	WildType
L1P14C7	AGTACGCTATAGTTCC	AACMGGATTAGATACCCKG	ACGTCATCCCCACCTTCC	AGTACGCTAT	AGTTCC	L1	P14	C7	Nippobare	Root	TSB	1	Rice	WildType
L1P14C8	CACGCTACGAAGTTCC	AACMGGATTAGATACCCKG	ACGTCATCCCCACCTTCC	CACGCTACGA	AGTTCC	L1	P14	C8	Nippobare	Root	TSB	1	Rice	WildType
L1P14C9	CACGCTACGTAGTTCC	AACMGGATTAGATACCCKG	ACGTCATCCCCACCTTCC	CACGCTACGT	AGTTCC	L1	P14	C9	Nippobare	Root	TSB	1	Rice	WildType
L1P14C10	CAGTAGACGTAGTTCC	AACMGGATTAGATACCCKG	ACGTCATCCCCACCTTCC	CAGTAGACGT	AGTTCC	L1	P14	C10	Nippobare	Root	TSB	1	Rice	WildType
L1P14C11	CGACGTGACTAGTTCC	AACMGGATTAGATACCCKG	ACGTCATCCCCACCTTCC	CGACGTGACT	AGTTCC	L1	P14	C11	Nippobare	Root	TSB	1	Rice	WildType
L1P14C12	CAGTCTCTAGAGTTCC	AACMGGATTAGATACCCKG	ACGTCATCCCCACCTTCC	CAGTCTCTAG	AGTTCC	L1	P14	C12	Nippobare	Root	TSB	1	Rice	WildType
L1P14D1	TACACGTGATAGTTCC	AACMGGATTAGATACCCKG	ACGTCATCCCCACCTTCC	TACACGTGAT	AGTTCC	L1	P14	D1	Nippobare	Root	TSB	1	Rice	WildType
L1P14D2	TACAGATCGTAGTTCC	AACMGGATTAGATACCCKG	ACGTCATCCCCACCTTCC	TACAGATCGT	AGTTCC	L1	P14	D2	Nippobare	Root	TSB	1	Rice	WildType
L1P14D3	TACGCTGTCTAGTTCC	AACMGGATTAGATACCCKG	ACGTCATCCCCACCTTCC	TACGCTGTCT	AGTTCC	L1	P14	D3	Nippobare	Root	TSB	1	Rice	WildType
L1P14D4	TAGTGTAGATAGTTCC	AACMGGATTAGATACCCKG	ACGTCATCCCCACCTTCC	TAGTGTAGAT	AGTTCC	L1	P14	D4	Nippobare	Root	TSB	1	Rice	WildType
L1P14D5	TCGATCACGTAGTTCC	AACMGGATTAGATACCCKG	ACGTCATCCCCACCTTCC	TCGATCACGT	AGTTCC	L1	P14	D5	Nippobare	Root	TSB	1	Rice	WildType
L1P14D6	TCGCACTAGTAGTTCC	AACMGGATTAGATACCCKG	ACGTCATCCCCACCTTCC	TCGCACTAGT	AGTTCC	L1	P14	D6	Nippobare	Root	TSB	1	Rice	WildType
L1P14D7	TCTAGCGACTAGTTCC	AACMGGATTAGATACCCKG	ACGTCATCCCCACCTTCC	TCTAGCGACT	AGTTCC	L1	P14	D7	Nippobare	Root	TSB	1	Rice	WildType
L1P14D8	CACGTGTATAAGTTCC	AACMGGATTAGATACCCKG	ACGTCATCCCCACCTTCC	CACGTGTATA	AGTTCC	L1	P14	D8	Nippobare	Root	TSB	1	Rice	WildType
L1P14D9	TGACGTATGTAGTTCC	AACMGGATTAGATACCCKG	ACGTCATCCCCACCTTCC	TGACGTATGT	AGTTCC	L1	P14	D9	Nippobare	Root	TSB	1	Rice	WildType
L1P14D10	CACTACGATGAGTTCC	AACMGGATTAGATACCCKG	ACGTCATCCCCACCTTCC	CACTACGATG	AGTTCC	L1	P14	D10	Nippobare	Root	TSB	1	Rice	WildType
L1P14D11	ACAGTATATAAGTTCC	AACMGGATTAGATACCCKG	ACGTCATCCCCACCTTCC	ACAGTATATA	AGTTCC	L1	P14	D11	Nippobare	Root	TSB	1	Rice	WildType
L1P14D12	ACGCGATCGAAGTTCC	AACMGGATTAGATACCCKG	ACGTCATCCCCACCTTCC	ACGCGATCGA	AGTTCC	L1	P14	D12	Nippobare	Root	TSB	1	Rice	WildType
L1P14E1	ACTAGCAGTAAGTTCC	AACMGGATTAGATACCCKG	ACGTCATCCCCACCTTCC	ACTAGCAGTA	AGTTCC	L1	P14	E1	Nippobare	Root	TSB	1	Rice	WildType
L1P14E2	AGCTCACGTAAGTTCC	AACMGGATTAGATACCCKG	ACGTCATCCCCACCTTCC	AGCTCACGTA	AGTTCC	L1	P14	E2	Nippobare	Root	TSB	1	Rice	WildType
L1P14E3	AGTATACATAAGTTCC	AACMGGATTAGATACCCKG	ACGTCATCCCCACCTTCC	AGTATACATA	AGTTCC	L1	P14	E3	Nippobare	Root	TSB	1	Rice	WildType
L1P14E4	AGTCGAGAGAAGTTCC	AACMGGATTAGATACCCKG	ACGTCATCCCCACCTTCC	AGTCGAGAGA	AGTTCC	L1	P14	E4	Nippobare	Root	TSB	1	Rice	WildType
L1P14E5	AGTGCTACGAAGTTCC	AACMGGATTAGATACCCKG	ACGTCATCCCCACCTTCC	AGTGCTACGA	AGTTCC	L1	P14	E5	Nippobare	Root	TSB	1	Rice	WildType
L1P14E6	CGATCGTATAAGTTCC	AACMGGATTAGATACCCKG	ACGTCATCCCCACCTTCC	CGATCGTATA	AGTTCC	L1	P14	E6	Nippobare	Root	TSB	1	Rice	WildType
L1P14E7	CGCAGTACGAAGTTCC	AACMGGATTAGATACCCKG	ACGTCATCCCCACCTTCC	CGCAGTACGA	AGTTCC	L1	P14	E7	Nippobare	Root	TSB	1	Rice	WildType
L1P14E8	CGCGTATACAAGTTCC	AACMGGATTAGATACCCKG	ACGTCATCCCCACCTTCC	CGCGTATACA	AGTTCC	L1	P14	E8	Nippobare	Root	TSB	1	Rice	WildType
L1P14E9	CGTACAGTCAAGTTCC	AACMGGATTAGATACCCKG	ACGTCATCCCCACCTTCC	CGTACAGTCA	AGTTCC	L1	P14	E9	Nippobare	Root	TSB	1	Rice	WildType
L1P14E10	CGTACTCAGAAGTTCC	AACMGGATTAGATACCCKG	ACGTCATCCCCACCTTCC	CGTACTCAGA	AGTTCC	L1	P14	E10	Nippobare	Root	TSB	1	Rice	WildType
L1P14E11	CTACGCTCTAAGTTCC	AACMGGATTAGATACCCKG	ACGTCATCCCCACCTTCC	CTACGCTCTA	AGTTCC	L1	P14	E11	Nippobare	Root	TSB	1	Rice	WildType
L1P14E12	CTATAGCGTAAGTTCC	AACMGGATTAGATACCCKG	ACGTCATCCCCACCTTCC	CTATAGCGTA	AGTTCC	L1	P14	E12	Nippobare	Root	TSB	1	Rice	WildType
L1P14F1	TACGTCATCAAGTTCC	AACMGGATTAGATACCCKG	ACGTCATCCCCACCTTCC	TACGTCATCA	AGTTCC	L1	P14	F1	Nippobare	Root	TSB	1	Rice	WildType
L1P14F2	TAGTCGCATAAGTTCC	AACMGGATTAGATACCCKG	ACGTCATCCCCACCTTCC	TAGTCGCATA	AGTTCC	L1	P14	F2	Nippobare	Root	TSB	1	Rice	WildType
L1P14F3	TATATATACAAGTTCC	AACMGGATTAGATACCCKG	ACGTCATCCCCACCTTCC	TATATATACA	AGTTCC	L1	P14	F3	Nippobare	Root	TSB	1	Rice	WildType
L1P14F4	TATGCTAGTAAGTTCC	AACMGGATTAGATACCCKG	ACGTCATCCCCACCTTCC	TATGCTAGTA	AGTTCC	L1	P14	F4	Nippobare	Root	TSB	1	Rice	WildType
L1P14F5	TCACGCGAGAAGTTCC	AACMGGATTAGATACCCKG	ACGTCATCCCCACCTTCC	TCACGCGAGA	AGTTCC	L1	P14	F5	Nippobare	Root	TSB	1	Rice	WildType
L1P14F6	TCGATAGTGAAGTTCC	AACMGGATTAGATACCCKG	ACGTCATCCCCACCTTCC	TCGATAGTGA	AGTTCC	L1	P14	F6	Nippobare	Root	TSB	1	Rice	WildType
L1P14F7	TCGCTGCGTAAGTTCC	AACMGGATTAGATACCCKG	ACGTCATCCCCACCTTCC	TCGCTGCGTA	AGTTCC	L1	P14	F7	Nippobare	Root	TSB	1	Rice	WildType
L1P14F8	TCTGACGTCAAGTTCC	AACMGGATTAGATACCCKG	ACGTCATCCCCACCTTCC	TCTGACGTCA	AGTTCC	L1	P14	F8	Nippobare	Root	TSB	1	Rice	WildType
L1P14F9	TGAGTCAGTAAGTTCC	AACMGGATTAGATACCCKG	ACGTCATCCCCACCTTCC	TGAGTCAGTA	AGTTCC	L1	P14	F9	Nippobare	Root	TSB	1	Rice	WildType
L1P14F10	CACTATACTCAGTTCC	AACMGGATTAGATACCCKG	ACGTCATCCCCACCTTCC	CACTATACTC	AGTTCC	L1	P14	F10	Nippobare	Root	TSB	1	Rice	WildType
L1P14F11	TGTCACACGAAGTTCC	AACMGGATTAGATACCCKG	ACGTCATCCCCACCTTCC	TGTCACACGA	AGTTCC	L1	P14	F11	Nippobare	Root	TSB	1	Rice	WildType
L1P14F12	TGTCGTCGCAAGTTCC	AACMGGATTAGATACCCKG	ACGTCATCCCCACCTTCC	TGTCGTCGCA	AGTTCC	L1	P14	F12	Nippobare	Root	TSB	1	Rice	WildType
L1P14G1	ACACATACGCAGTTCC	AACMGGATTAGATACCCKG	ACGTCATCCCCACCTTCC	ACACATACGC	AGTTCC	L1	P14	G1	Nippobare	Root	TSB	1	Rice	WildType
L1P14G2	ACAGTCGTGCAGTTCC	AACMGGATTAGATACCCKG	ACGTCATCCCCACCTTCC	ACAGTCGTGC	AGTTCC	L1	P14	G2	Nippobare	Root	TSB	1	Rice	WildType
L1P14G3	ACATGACGACAGTTCC	AACMGGATTAGATACCCKG	ACGTCATCCCCACCTTCC	ACATGACGAC	AGTTCC	L1	P14	G3	Nippobare	Root	TSB	1	Rice	WildType
L1P14G4	ACGACAGCTCAGTTCC	AACMGGATTAGATACCCKG	ACGTCATCCCCACCTTCC	ACGACAGCTC	AGTTCC	L1	P14	G4	Nippobare	Root	TSB	1	Rice	WildType
L1P14G5	ACGTCTCATCAGTTCC	AACMGGATTAGATACCCKG	ACGTCATCCCCACCTTCC	ACGTCTCATC	AGTTCC	L1	P14	G5	Nippobare	Root	TSB	1	Rice	WildType
L1P14G6	ACTCATCTACAGTTCC	AACMGGATTAGATACCCKG	ACGTCATCCCCACCTTCC	ACTCATCTAC	AGTTCC	L1	P14	G6	Nippobare	Root	TSB	1	Rice	WildType
L1P14G7	ACTCGCGCACAGTTCC	AACMGGATTAGATACCCKG	ACGTCATCCCCACCTTCC	ACTCGCGCAC	AGTTCC	L1	P14	G7	Nippobare	Root	TSB	1	Rice	WildType
L1P14G8	AGAGCGTCACAGTTCC	AACMGGATTAGATACCCKG	ACGTCATCCCCACCTTCC	AGAGCGTCAC	AGTTCC	L1	P14	G8	Nippobare	Root	TSB	1	Rice	WildType
L1P14G9	AGCGACTAGCAGTTCC	AACMGGATTAGATACCCKG	ACGTCATCCCCACCTTCC	AGCGACTAGC	AGTTCC	L1	P14	G9	Nippobare	Root	TSB	1	Rice	WildType
L1P14G10	CAGCGTACTGAGTTCC	AACMGGATTAGATACCCKG	ACGTCATCCCCACCTTCC	CAGCGTACTG	AGTTCC	L1	P14	G10	Nippobare	Root	TSB	1	Rice	WildType
L1P14G11	AGTGACACACAGTTCC	AACMGGATTAGATACCCKG	ACGTCATCCCCACCTTCC	AGTGACACAC	AGTTCC	L1	P14	G11	Nippobare	Root	TSB	1	Rice	WildType
L1P14G12	AGTGTATGTCAGTTCC	AACMGGATTAGATACCCKG	ACGTCATCCCCACCTTCC	AGTGTATGTC	AGTTCC	L1	P14	G12	Nippobare	Root	TSB	1	Rice	WildType
L1P14H1	ATAGATAGACAGTTCC	AACMGGATTAGATACCCKG	ACGTCATCCCCACCTTCC	ATAGATAGAC	AGTTCC	L1	P14	H1	Nippobare	Root	TSB	1	Rice	WildType
L1P14H2	ATATAGTCGCAGTTCC	AACMGGATTAGATACCCKG	ACGTCATCCCCACCTTCC	ATATAGTCGC	AGTTCC	L1	P14	H2	Nippobare	Root	TSB	1	Rice	WildType
L1P14H3	ATCTACTGACAGTTCC	AACMGGATTAGATACCCKG	ACGTCATCCCCACCTTCC	ATCTACTGAC	AGTTCC	L1	P14	H3	Nippobare	Root	TSB	1	Rice	WildType
L1P14H4	CACGTAGATCAGTTCC	AACMGGATTAGATACCCKG	ACGTCATCCCCACCTTCC	CACGTAGATC	AGTTCC	L1	P14	H4	Nippobare	Root	TSB	1	Rice	WildType
L1P14H5	CACGTCTCGCAGTTCC	AACMGGATTAGATACCCKG	ACGTCATCCCCACCTTCC	CACGTCTCGC	AGTTCC	L1	P14	H5	Nippobare	Root	TSB	1	Rice	WildType
L1P14H6	CATACTCTACAGTTCC	AACMGGATTAGATACCCKG	ACGTCATCCCCACCTTCC	CATACTCTAC	AGTTCC	L1	P14	H6	Nippobare	Root	TSB	1	Rice	WildType
L1P14H7	CGACACTATCAGTTCC	AACMGGATTAGATACCCKG	ACGTCATCCCCACCTTCC	CGACACTATC	AGTTCC	L1	P14	H7	Nippobare	Root	TSB	1	Rice	WildType
L1P14H8	CGAGACGCGCAGTTCC	AACMGGATTAGATACCCKG	ACGTCATCCCCACCTTCC	CGAGACGCGC	AGTTCC	L1	P14	H8	Nippobare	Root	TSB	1	Rice	WildType
L1P14H9	CGTATGCGACAGTTCC	AACMGGATTAGATACCCKG	ACGTCATCCCCACCTTCC	CGTATGCGAC	AGTTCC	L1	P14	H9	Nippobare	Root	TSB	1	Rice	WildType
L1P14H10	CGTCGATCTCAGTTCC	AACMGGATTAGATACCCKG	ACGTCATCCCCACCTTCC	CGTCGATCTC	AGTTCC	L1	P14	H10	Nippobare	Root	TSB	1	Rice	WildType
L1P14H11	CTACGACTGCAGTTCC	AACMGGATTAGATACCCKG	ACGTCATCCCCACCTTCC	CTACGACTGC	AGTTCC	L1	P14	H11	Nippobare	Root	TSB	1	Rice	WildType
L1P14H12	CTAGTCACTCAGTTCC	AACMGGATTAGATACCCKG	ACGTCATCCCCACCTTCC	CTAGTCACTC	AGTTCC	L1	P14	H12	Nippobare	Root	TSB	1	Rice	WildType
L1P15A1	ACGCTCGACAATGTCA	AACMGGATTAGATACCCKG	ACGTCATCCCCACCTTCC	ACGCTCGACA	ATGTCA	L1	P15	A1	Nippobare	Root	TSB	1	Rice	WildType
L1P15A2	AGACGCACTCATGTCA	AACMGGATTAGATACCCKG	ACGTCATCCCCACCTTCC	AGACGCACTC	ATGTCA	L1	P15	A2	Nippobare	Root	TSB	1	Rice	WildType
L1P15A3	AGCACTGTAGATGTCA	AACMGGATTAGATACCCKG	ACGTCATCCCCACCTTCC	AGCACTGTAG	ATGTCA	L1	P15	A3	Nippobare	Root	TSB	1	Rice	WildType
L1P15A4	ATCAGACACGATGTCA	AACMGGATTAGATACCCKG	ACGTCATCCCCACCTTCC	ATCAGACACG	ATGTCA	L1	P15	A4	Nippobare	Root	TSB	1	Rice	WildType
L1P15A5	ATATCGCGAGATGTCA	AACMGGATTAGATACCCKG	ACGTCATCCCCACCTTCC	ATATCGCGAG	ATGTCA	L1	P15	A5	Nippobare	Root	TSB	1	Rice	WildType
L1P15A6	CACGAGACAGATGTCA	AACMGGATTAGATACCCKG	ACGTCATCCCCACCTTCC	CACGAGACAG	ATGTCA	L1	P15	A6	Nippobare	Root	TSB	1	Rice	WildType
L1P15A7	CTCGCGTGTCATGTCA	AACMGGATTAGATACCCKG	ACGTCATCCCCACCTTCC	CTCGCGTGTC	ATGTCA	L1	P15	A7	Nippobare	Root	TSB	1	Rice	WildType
L1P15A8	TAGTATCAGCATGTCA	AACMGGATTAGATACCCKG	ACGTCATCCCCACCTTCC	TAGTATCAGC	ATGTCA	L1	P15	A8	Nippobare	Root	TSB	1	Rice	WildType
L1P15A9	TCTCTATGCGATGTCA	AACMGGATTAGATACCCKG	ACGTCATCCCCACCTTCC	TCTCTATGCG	ATGTCA	L1	P15	A9	Nippobare	Root	TSB	1	Rice	WildType
L1P15A10	TGATACGTCTATGTCA	AACMGGATTAGATACCCKG	ACGTCATCCCCACCTTCC	TGATACGTCT	ATGTCA	L1	P15	A10	Nippobare	Root	TSB	1	Rice	WildType
L1P15A11	TACTGAGCTAATGTCA	AACMGGATTAGATACCCKG	ACGTCATCCCCACCTTCC	TACTGAGCTA	ATGTCA	L1	P15	A11	Nippobare	Root	TSB	1	Rice	WildType
L1P15A12	CATAGTAGTGATGTCA	AACMGGATTAGATACCCKG	ACGTCATCCCCACCTTCC	CATAGTAGTG	ATGTCA	L1	P15	A12	Nippobare	Root	TSB	1	Rice	WildType
L1P15B1	CGAGAGATACATGTCA	AACMGGATTAGATACCCKG	ACGTCATCCCCACCTTCC	CGAGAGATAC	ATGTCA	L1	P15	B1	Nippobare	Root	TSB	1	Rice	WildType
L1P15B2	ATACGACGTAATGTCA	AACMGGATTAGATACCCKG	ACGTCATCCCCACCTTCC	ATACGACGTA	ATGTCA	L1	P15	B2	Nippobare	Root	TSB	1	Rice	WildType
L1P15B3	TCACGTACTAATGTCA	AACMGGATTAGATACCCKG	ACGTCATCCCCACCTTCC	TCACGTACTA	ATGTCA	L1	P15	B3	Nippobare	Root	TSB	1	Rice	WildType
L1P15B4	CGTCTAGTACATGTCA	AACMGGATTAGATACCCKG	ACGTCATCCCCACCTTCC	CGTCTAGTAC	ATGTCA	L1	P15	B4	Nippobare	Root	TSB	1	Rice	WildType
L1P15B5	TCTACGTAGCATGTCA	AACMGGATTAGATACCCKG	ACGTCATCCCCACCTTCC	TCTACGTAGC	ATGTCA	L1	P15	B5	Nippobare	Root	TSB	1	Rice	WildType
L1P15B6	CACGCGAGTCATGTCA	AACMGGATTAGATACCCKG	ACGTCATCCCCACCTTCC	CACGCGAGTC	ATGTCA	L1	P15	B6	Nippobare	Root	TSB	1	Rice	WildType
L1P15B7	ACGACTACAGATGTCA	AACMGGATTAGATACCCKG	ACGTCATCCCCACCTTCC	ACGACTACAG	ATGTCA	L1	P15	B7	Nippobare	Root	TSB	1	Rice	WildType
L1P15B8	CGTAGACTAGATGTCA	AACMGGATTAGATACCCKG	ACGTCATCCCCACCTTCC	CGTAGACTAG	ATGTCA	L1	P15	B8	Nippobare	Root	TSB	1	Rice	WildType
L1P15B9	TACGAGTATGATGTCA	AACMGGATTAGATACCCKG	ACGTCATCCCCACCTTCC	TACGAGTATG	ATGTCA	L1	P15	B9	Nippobare	Root	TSB	1	Rice	WildType
L1P15B10	TACTCTCGTGATGTCA	AACMGGATTAGATACCCKG	ACGTCATCCCCACCTTCC	TACTCTCGTG	ATGTCA	L1	P15	B10	Nippobare	Root	TSB	1	Rice	WildType
L1P15B11	TAGAGACGAGATGTCA	AACMGGATTAGATACCCKG	ACGTCATCCCCACCTTCC	TAGAGACGAG	ATGTCA	L1	P15	B11	Nippobare	Root	TSB	1	Rice	WildType
L1P15B12	TCGTCGCTCGATGTCA	AACMGGATTAGATACCCKG	ACGTCATCCCCACCTTCC	TCGTCGCTCG	ATGTCA	L1	P15	B12	Nippobare	Root	TSB	1	Rice	WildType
L1P15C1	ACATACGCGTATGTCA	AACMGGATTAGATACCCKG	ACGTCATCCCCACCTTCC	ACATACGCGT	ATGTCA	L1	P15	C1	Nippobare	Root	TSB	1	Rice	WildType
L1P15C2	ACGCGAGTATATGTCA	AACMGGATTAGATACCCKG	ACGTCATCCCCACCTTCC	ACGCGAGTAT	ATGTCA	L1	P15	C2	Nippobare	Root	TSB	1	Rice	WildType
L1P15C3	ACTACTATGTATGTCA	AACMGGATTAGATACCCKG	ACGTCATCCCCACCTTCC	ACTACTATGT	ATGTCA	L1	P15	C3	Nippobare	Root	TSB	1	Rice	WildType
L1P15C4	ACTGTACAGTATGTCA	AACMGGATTAGATACCCKG	ACGTCATCCCCACCTTCC	ACTGTACAGT	ATGTCA	L1	P15	C4	Nippobare	Root	TSB	1	Rice	WildType
L1P15C5	AGACTATACTATGTCA	AACMGGATTAGATACCCKG	ACGTCATCCCCACCTTCC	AGACTATACT	ATGTCA	L1	P15	C5	Nippobare	Root	TSB	1	Rice	WildType
L1P15C6	AGCGTCGTCTATGTCA	AACMGGATTAGATACCCKG	ACGTCATCCCCACCTTCC	AGCGTCGTCT	ATGTCA	L1	P15	C6	Nippobare	Root	TSB	1	Rice	WildType
L1P15C7	AGTACGCTATATGTCA	AACMGGATTAGATACCCKG	ACGTCATCCCCACCTTCC	AGTACGCTAT	ATGTCA	L1	P15	C7	Nippobare	Root	TSB	1	Rice	WildType
L1P15C8	CACGCTACGAATGTCA	AACMGGATTAGATACCCKG	ACGTCATCCCCACCTTCC	CACGCTACGA	ATGTCA	L1	P15	C8	Nippobare	Root	TSB	1	Rice	WildType
L1P15C9	CACGCTACGTATGTCA	AACMGGATTAGATACCCKG	ACGTCATCCCCACCTTCC	CACGCTACGT	ATGTCA	L1	P15	C9	Nippobare	Root	TSB	1	Rice	WildType
L1P15C10	CAGTAGACGTATGTCA	AACMGGATTAGATACCCKG	ACGTCATCCCCACCTTCC	CAGTAGACGT	ATGTCA	L1	P15	C10	Nippobare	Root	TSB	1	Rice	WildType
L1P15C11	CGACGTGACTATGTCA	AACMGGATTAGATACCCKG	ACGTCATCCCCACCTTCC	CGACGTGACT	ATGTCA	L1	P15	C11	Nippobare	Root	TSB	1	Rice	WildType
L1P15C12	CAGTCTCTAGATGTCA	AACMGGATTAGATACCCKG	ACGTCATCCCCACCTTCC	CAGTCTCTAG	ATGTCA	L1	P15	C12	Nippobare	Root	TSB	1	Rice	WildType
L1P15D1	TACACGTGATATGTCA	AACMGGATTAGATACCCKG	ACGTCATCCCCACCTTCC	TACACGTGAT	ATGTCA	L1	P15	D1	Nippobare	Root	TSB	1	Rice	WildType
L1P15D2	TACAGATCGTATGTCA	AACMGGATTAGATACCCKG	ACGTCATCCCCACCTTCC	TACAGATCGT	ATGTCA	L1	P15	D2	Nippobare	Root	TSB	1	Rice	WildType
L1P15D3	TACGCTGTCTATGTCA	AACMGGATTAGATACCCKG	ACGTCATCCCCACCTTCC	TACGCTGTCT	ATGTCA	L1	P15	D3	Nippobare	Root	TSB	1	Rice	WildType
L1P15D4	TAGTGTAGATATGTCA	AACMGGATTAGATACCCKG	ACGTCATCCCCACCTTCC	TAGTGTAGAT	ATGTCA	L1	P15	D4	Nippobare	Root	TSB	1	Rice	WildType
L1P15D5	TCGATCACGTATGTCA	AACMGGATTAGATACCCKG	ACGTCATCCCCACCTTCC	TCGATCACGT	ATGTCA	L1	P15	D5	Nippobare	Root	TSB	1	Rice	WildType
L1P15D6	TCGCACTAGTATGTCA	AACMGGATTAGATACCCKG	ACGTCATCCCCACCTTCC	TCGCACTAGT	ATGTCA	L1	P15	D6	Nippobare	Root	TSB	1	Rice	WildType
L1P15D7	TCTAGCGACTATGTCA	AACMGGATTAGATACCCKG	ACGTCATCCCCACCTTCC	TCTAGCGACT	ATGTCA	L1	P15	D7	Nippobare	Root	TSB	1	Rice	WildType
L1P15D8	CACGTGTATAATGTCA	AACMGGATTAGATACCCKG	ACGTCATCCCCACCTTCC	CACGTGTATA	ATGTCA	L1	P15	D8	Nippobare	Root	TSB	1	Rice	WildType
L1P15D9	TGACGTATGTATGTCA	AACMGGATTAGATACCCKG	ACGTCATCCCCACCTTCC	TGACGTATGT	ATGTCA	L1	P15	D9	Nippobare	Root	TSB	1	Rice	WildType
L1P15D10	CACTACGATGATGTCA	AACMGGATTAGATACCCKG	ACGTCATCCCCACCTTCC	CACTACGATG	ATGTCA	L1	P15	D10	Nippobare	Root	TSB	1	Rice	WildType
L1P15D11	ACAGTATATAATGTCA	AACMGGATTAGATACCCKG	ACGTCATCCCCACCTTCC	ACAGTATATA	ATGTCA	L1	P15	D11	Nippobare	Root	TSB	1	Rice	WildType
L1P15D12	ACGCGATCGAATGTCA	AACMGGATTAGATACCCKG	ACGTCATCCCCACCTTCC	ACGCGATCGA	ATGTCA	L1	P15	D12	Nippobare	Root	TSB	1	Rice	WildType
L1P15E1	ACTAGCAGTAATGTCA	AACMGGATTAGATACCCKG	ACGTCATCCCCACCTTCC	ACTAGCAGTA	ATGTCA	L1	P15	E1	Nippobare	Root	TSB	1	Rice	WildType
L1P15E2	AGCTCACGTAATGTCA	AACMGGATTAGATACCCKG	ACGTCATCCCCACCTTCC	AGCTCACGTA	ATGTCA	L1	P15	E2	Nippobare	Root	TSB	1	Rice	WildType
L1P15E3	AGTATACATAATGTCA	AACMGGATTAGATACCCKG	ACGTCATCCCCACCTTCC	AGTATACATA	ATGTCA	L1	P15	E3	Nippobare	Root	TSB	1	Rice	WildType
L1P15E4	AGTCGAGAGAATGTCA	AACMGGATTAGATACCCKG	ACGTCATCCCCACCTTCC	AGTCGAGAGA	ATGTCA	L1	P15	E4	Nippobare	Root	TSB	1	Rice	WildType
L1P15E5	AGTGCTACGAATGTCA	AACMGGATTAGATACCCKG	ACGTCATCCCCACCTTCC	AGTGCTACGA	ATGTCA	L1	P15	E5	Nippobare	Root	TSB	1	Rice	WildType
L1P15E6	CGATCGTATAATGTCA	AACMGGATTAGATACCCKG	ACGTCATCCCCACCTTCC	CGATCGTATA	ATGTCA	L1	P15	E6	Nippobare	Root	TSB	1	Rice	WildType
L1P15E7	CGCAGTACGAATGTCA	AACMGGATTAGATACCCKG	ACGTCATCCCCACCTTCC	CGCAGTACGA	ATGTCA	L1	P15	E7	Nippobare	Root	TSB	1	Rice	WildType
L1P15E8	CGCGTATACAATGTCA	AACMGGATTAGATACCCKG	ACGTCATCCCCACCTTCC	CGCGTATACA	ATGTCA	L1	P15	E8	Nippobare	Root	TSB	1	Rice	WildType
L1P15E9	CGTACAGTCAATGTCA	AACMGGATTAGATACCCKG	ACGTCATCCCCACCTTCC	CGTACAGTCA	ATGTCA	L1	P15	E9	Nippobare	Root	TSB	1	Rice	WildType
L1P15E10	CGTACTCAGAATGTCA	AACMGGATTAGATACCCKG	ACGTCATCCCCACCTTCC	CGTACTCAGA	ATGTCA	L1	P15	E10	Nippobare	Root	TSB	1	Rice	WildType
L1P15E11	CTACGCTCTAATGTCA	AACMGGATTAGATACCCKG	ACGTCATCCCCACCTTCC	CTACGCTCTA	ATGTCA	L1	P15	E11	Nippobare	Root	TSB	1	Rice	WildType
L1P15E12	CTATAGCGTAATGTCA	AACMGGATTAGATACCCKG	ACGTCATCCCCACCTTCC	CTATAGCGTA	ATGTCA	L1	P15	E12	Nippobare	Root	TSB	1	Rice	WildType
L1P15F1	TACGTCATCAATGTCA	AACMGGATTAGATACCCKG	ACGTCATCCCCACCTTCC	TACGTCATCA	ATGTCA	L1	P15	F1	Nippobare	Root	TSB	1	Rice	WildType
L1P15F2	TAGTCGCATAATGTCA	AACMGGATTAGATACCCKG	ACGTCATCCCCACCTTCC	TAGTCGCATA	ATGTCA	L1	P15	F2	Nippobare	Root	TSB	1	Rice	WildType
L1P15F3	TATATATACAATGTCA	AACMGGATTAGATACCCKG	ACGTCATCCCCACCTTCC	TATATATACA	ATGTCA	L1	P15	F3	Nippobare	Root	TSB	1	Rice	WildType
L1P15F4	TATGCTAGTAATGTCA	AACMGGATTAGATACCCKG	ACGTCATCCCCACCTTCC	TATGCTAGTA	ATGTCA	L1	P15	F4	Nippobare	Root	TSB	1	Rice	WildType
L1P15F5	TCACGCGAGAATGTCA	AACMGGATTAGATACCCKG	ACGTCATCCCCACCTTCC	TCACGCGAGA	ATGTCA	L1	P15	F5	Nippobare	Root	TSB	1	Rice	WildType
L1P15F6	TCGATAGTGAATGTCA	AACMGGATTAGATACCCKG	ACGTCATCCCCACCTTCC	TCGATAGTGA	ATGTCA	L1	P15	F6	Nippobare	Root	TSB	1	Rice	WildType
L1P15F7	TCGCTGCGTAATGTCA	AACMGGATTAGATACCCKG	ACGTCATCCCCACCTTCC	TCGCTGCGTA	ATGTCA	L1	P15	F7	Nippobare	Root	TSB	1	Rice	WildType
L1P15F8	TCTGACGTCAATGTCA	AACMGGATTAGATACCCKG	ACGTCATCCCCACCTTCC	TCTGACGTCA	ATGTCA	L1	P15	F8	Nippobare	Root	TSB	1	Rice	WildType
L1P15F9	TGAGTCAGTAATGTCA	AACMGGATTAGATACCCKG	ACGTCATCCCCACCTTCC	TGAGTCAGTA	ATGTCA	L1	P15	F9	Nippobare	Root	TSB	1	Rice	WildType
L1P15F10	CACTATACTCATGTCA	AACMGGATTAGATACCCKG	ACGTCATCCCCACCTTCC	CACTATACTC	ATGTCA	L1	P15	F10	Nippobare	Root	TSB	1	Rice	WildType
L1P15F11	TGTCACACGAATGTCA	AACMGGATTAGATACCCKG	ACGTCATCCCCACCTTCC	TGTCACACGA	ATGTCA	L1	P15	F11	Nippobare	Root	TSB	1	Rice	WildType
L1P15F12	TGTCGTCGCAATGTCA	AACMGGATTAGATACCCKG	ACGTCATCCCCACCTTCC	TGTCGTCGCA	ATGTCA	L1	P15	F12	Nippobare	Root	TSB	1	Rice	WildType
L1P15G1	ACACATACGCATGTCA	AACMGGATTAGATACCCKG	ACGTCATCCCCACCTTCC	ACACATACGC	ATGTCA	L1	P15	G1	Nippobare	Root	TSB	1	Rice	WildType
L1P15G2	ACAGTCGTGCATGTCA	AACMGGATTAGATACCCKG	ACGTCATCCCCACCTTCC	ACAGTCGTGC	ATGTCA	L1	P15	G2	Nippobare	Root	TSB	1	Rice	WildType
L1P15G3	ACATGACGACATGTCA	AACMGGATTAGATACCCKG	ACGTCATCCCCACCTTCC	ACATGACGAC	ATGTCA	L1	P15	G3	Nippobare	Root	TSB	1	Rice	WildType
L1P15G4	ACGACAGCTCATGTCA	AACMGGATTAGATACCCKG	ACGTCATCCCCACCTTCC	ACGACAGCTC	ATGTCA	L1	P15	G4	Nippobare	Root	TSB	1	Rice	WildType
L1P15G5	ACGTCTCATCATGTCA	AACMGGATTAGATACCCKG	ACGTCATCCCCACCTTCC	ACGTCTCATC	ATGTCA	L1	P15	G5	Nippobare	Root	TSB	1	Rice	WildType
L1P15G6	ACTCATCTACATGTCA	AACMGGATTAGATACCCKG	ACGTCATCCCCACCTTCC	ACTCATCTAC	ATGTCA	L1	P15	G6	Nippobare	Root	TSB	1	Rice	WildType
L1P15G7	ACTCGCGCACATGTCA	AACMGGATTAGATACCCKG	ACGTCATCCCCACCTTCC	ACTCGCGCAC	ATGTCA	L1	P15	G7	Nippobare	Root	TSB	1	Rice	WildType
L1P15G8	AGAGCGTCACATGTCA	AACMGGATTAGATACCCKG	ACGTCATCCCCACCTTCC	AGAGCGTCAC	ATGTCA	L1	P15	G8	Nippobare	Root	TSB	1	Rice	WildType
L1P15G9	AGCGACTAGCATGTCA	AACMGGATTAGATACCCKG	ACGTCATCCCCACCTTCC	AGCGACTAGC	ATGTCA	L1	P15	G9	Nippobare	Root	TSB	1	Rice	WildType
L1P15G10	CAGCGTACTGATGTCA	AACMGGATTAGATACCCKG	ACGTCATCCCCACCTTCC	CAGCGTACTG	ATGTCA	L1	P15	G10	Nippobare	Root	TSB	1	Rice	WildType
L1P15G11	AGTGACACACATGTCA	AACMGGATTAGATACCCKG	ACGTCATCCCCACCTTCC	AGTGACACAC	ATGTCA	L1	P15	G11	Nippobare	Root	TSB	1	Rice	WildType
L1P15G12	AGTGTATGTCATGTCA	AACMGGATTAGATACCCKG	ACGTCATCCCCACCTTCC	AGTGTATGTC	ATGTCA	L1	P15	G12	Nippobare	Root	TSB	1	Rice	WildType
L1P15H1	ATAGATAGACATGTCA	AACMGGATTAGATACCCKG	ACGTCATCCCCACCTTCC	ATAGATAGAC	ATGTCA	L1	P15	H1	Nippobare	Root	TSB	1	Rice	WildType
L1P15H2	ATATAGTCGCATGTCA	AACMGGATTAGATACCCKG	ACGTCATCCCCACCTTCC	ATATAGTCGC	ATGTCA	L1	P15	H2	Nippobare	Root	TSB	1	Rice	WildType
L1P15H3	ATCTACTGACATGTCA	AACMGGATTAGATACCCKG	ACGTCATCCCCACCTTCC	ATCTACTGAC	ATGTCA	L1	P15	H3	Nippobare	Root	TSB	1	Rice	WildType
L1P15H4	CACGTAGATCATGTCA	AACMGGATTAGATACCCKG	ACGTCATCCCCACCTTCC	CACGTAGATC	ATGTCA	L1	P15	H4	Nippobare	Root	TSB	1	Rice	WildType
L1P15H5	CACGTCTCGCATGTCA	AACMGGATTAGATACCCKG	ACGTCATCCCCACCTTCC	CACGTCTCGC	ATGTCA	L1	P15	H5	Nippobare	Root	TSB	1	Rice	WildType
L1P15H6	CATACTCTACATGTCA	AACMGGATTAGATACCCKG	ACGTCATCCCCACCTTCC	CATACTCTAC	ATGTCA	L1	P15	H6	Nippobare	Root	TSB	1	Rice	WildType
L1P15H7	CGACACTATCATGTCA	AACMGGATTAGATACCCKG	ACGTCATCCCCACCTTCC	CGACACTATC	ATGTCA	L1	P15	H7	Nippobare	Root	TSB	1	Rice	WildType
L1P15H8	CGAGACGCGCATGTCA	AACMGGATTAGATACCCKG	ACGTCATCCCCACCTTCC	CGAGACGCGC	ATGTCA	L1	P15	H8	Nippobare	Root	TSB	1	Rice	WildType
L1P15H9	CGTATGCGACATGTCA	AACMGGATTAGATACCCKG	ACGTCATCCCCACCTTCC	CGTATGCGAC	ATGTCA	L1	P15	H9	Nippobare	Root	TSB	1	Rice	WildType
L1P15H10	CGTCGATCTCATGTCA	AACMGGATTAGATACCCKG	ACGTCATCCCCACCTTCC	CGTCGATCTC	ATGTCA	L1	P15	H10	Nippobare	Root	TSB	1	Rice	WildType
L1P15H11	CTACGACTGCATGTCA	AACMGGATTAGATACCCKG	ACGTCATCCCCACCTTCC	CTACGACTGC	ATGTCA	L1	P15	H11	Nippobare	Root	TSB	1	Rice	WildType
L1P15H12	CTAGTCACTCATGTCA	AACMGGATTAGATACCCKG	ACGTCATCCCCACCTTCC	CTAGTCACTC	ATGTCA	L1	P15	H12	Nippobare	Root	TSB	1	Rice	WildType
L1P16A1	ACGCTCGACACCGTCC	AACMGGATTAGATACCCKG	ACGTCATCCCCACCTTCC	ACGCTCGACA	CCGTCC	L1	P16	A1	Nippobare	Root	TSB	1	Rice	WildType
L1P16A2	AGACGCACTCCCGTCC	AACMGGATTAGATACCCKG	ACGTCATCCCCACCTTCC	AGACGCACTC	CCGTCC	L1	P16	A2	Nippobare	Root	TSB	1	Rice	WildType
L1P16A3	AGCACTGTAGCCGTCC	AACMGGATTAGATACCCKG	ACGTCATCCCCACCTTCC	AGCACTGTAG	CCGTCC	L1	P16	A3	Nippobare	Root	TSB	1	Rice	WildType
L1P16A4	ATCAGACACGCCGTCC	AACMGGATTAGATACCCKG	ACGTCATCCCCACCTTCC	ATCAGACACG	CCGTCC	L1	P16	A4	Nippobare	Root	TSB	1	Rice	WildType
L1P16A5	ATATCGCGAGCCGTCC	AACMGGATTAGATACCCKG	ACGTCATCCCCACCTTCC	ATATCGCGAG	CCGTCC	L1	P16	A5	Nippobare	Root	TSB	1	Rice	WildType
L1P16A6	CACGAGACAGCCGTCC	AACMGGATTAGATACCCKG	ACGTCATCCCCACCTTCC	CACGAGACAG	CCGTCC	L1	P16	A6	Nippobare	Root	TSB	1	Rice	WildType
L1P16A7	CTCGCGTGTCCCGTCC	AACMGGATTAGATACCCKG	ACGTCATCCCCACCTTCC	CTCGCGTGTC	CCGTCC	L1	P16	A7	Nippobare	Root	TSB	1	Rice	WildType
L1P16A8	TAGTATCAGCCCGTCC	AACMGGATTAGATACCCKG	ACGTCATCCCCACCTTCC	TAGTATCAGC	CCGTCC	L1	P16	A8	Nippobare	Root	TSB	1	Rice	WildType
L1P16A9	TCTCTATGCGCCGTCC	AACMGGATTAGATACCCKG	ACGTCATCCCCACCTTCC	TCTCTATGCG	CCGTCC	L1	P16	A9	Nippobare	Root	TSB	1	Rice	WildType
L1P16A10	TGATACGTCTCCGTCC	AACMGGATTAGATACCCKG	ACGTCATCCCCACCTTCC	TGATACGTCT	CCGTCC	L1	P16	A10	Nippobare	Root	TSB	1	Rice	WildType
L1P16A11	TACTGAGCTACCGTCC	AACMGGATTAGATACCCKG	ACGTCATCCCCACCTTCC	TACTGAGCTA	CCGTCC	L1	P16	A11	Nippobare	Root	TSB	1	Rice	WildType
L1P16A12	CATAGTAGTGCCGTCC	AACMGGATTAGATACCCKG	ACGTCATCCCCACCTTCC	CATAGTAGTG	CCGTCC	L1	P16	A12	Nippobare	Root	TSB	1	Rice	WildType
L1P16B1	CGAGAGATACCCGTCC	AACMGGATTAGATACCCKG	ACGTCATCCCCACCTTCC	CGAGAGATAC	CCGTCC	L1	P16	B1	Nippobare	Root	TSB	1	Rice	WildType
L1P16B2	ATACGACGTACCGTCC	AACMGGATTAGATACCCKG	ACGTCATCCCCACCTTCC	ATACGACGTA	CCGTCC	L1	P16	B2	Nippobare	Root	TSB	1	Rice	WildType
L1P16B3	TCACGTACTACCGTCC	AACMGGATTAGATACCCKG	ACGTCATCCCCACCTTCC	TCACGTACTA	CCGTCC	L1	P16	B3	Nippobare	Root	TSB	1	Rice	WildType
L1P16B4	CGTCTAGTACCCGTCC	AACMGGATTAGATACCCKG	ACGTCATCCCCACCTTCC	CGTCTAGTAC	CCGTCC	L1	P16	B4	Nippobare	Root	TSB	1	Rice	WildType
L1P16B5	TCTACGTAGCCCGTCC	AACMGGATTAGATACCCKG	ACGTCATCCCCACCTTCC	TCTACGTAGC	CCGTCC	L1	P16	B5	Nippobare	Root	TSB	1	Rice	WildType
L1P16B6	CACGCGAGTCCCGTCC	AACMGGATTAGATACCCKG	ACGTCATCCCCACCTTCC	CACGCGAGTC	CCGTCC	L1	P16	B6	Nippobare	Root	TSB	1	Rice	WildType
L1P16B7	ACGACTACAGCCGTCC	AACMGGATTAGATACCCKG	ACGTCATCCCCACCTTCC	ACGACTACAG	CCGTCC	L1	P16	B7	Nippobare	Root	TSB	1	Rice	WildType
L1P16B8	CGTAGACTAGCCGTCC	AACMGGATTAGATACCCKG	ACGTCATCCCCACCTTCC	CGTAGACTAG	CCGTCC	L1	P16	B8	Nippobare	Root	TSB	1	Rice	WildType
L1P16B9	TACGAGTATGCCGTCC	AACMGGATTAGATACCCKG	ACGTCATCCCCACCTTCC	TACGAGTATG	CCGTCC	L1	P16	B9	Nippobare	Root	TSB	1	Rice	WildType
L1P16B10	TACTCTCGTGCCGTCC	AACMGGATTAGATACCCKG	ACGTCATCCCCACCTTCC	TACTCTCGTG	CCGTCC	L1	P16	B10	Nippobare	Root	TSB	1	Rice	WildType
L1P16B11	TAGAGACGAGCCGTCC	AACMGGATTAGATACCCKG	ACGTCATCCCCACCTTCC	TAGAGACGAG	CCGTCC	L1	P16	B11	Nippobare	Root	TSB	1	Rice	WildType
L1P16B12	TCGTCGCTCGCCGTCC	AACMGGATTAGATACCCKG	ACGTCATCCCCACCTTCC	TCGTCGCTCG	CCGTCC	L1	P16	B12	Nippobare	Root	TSB	1	Rice	WildType
L1P16C1	ACATACGCGTCCGTCC	AACMGGATTAGATACCCKG	ACGTCATCCCCACCTTCC	ACATACGCGT	CCGTCC	L1	P16	C1	Nippobare	Root	TSB	1	Rice	WildType
L1P16C2	ACGCGAGTATCCGTCC	AACMGGATTAGATACCCKG	ACGTCATCCCCACCTTCC	ACGCGAGTAT	CCGTCC	L1	P16	C2	Nippobare	Root	TSB	1	Rice	WildType
L1P16C3	ACTACTATGTCCGTCC	AACMGGATTAGATACCCKG	ACGTCATCCCCACCTTCC	ACTACTATGT	CCGTCC	L1	P16	C3	Nippobare	Root	TSB	1	Rice	WildType
L1P16C4	ACTGTACAGTCCGTCC	AACMGGATTAGATACCCKG	ACGTCATCCCCACCTTCC	ACTGTACAGT	CCGTCC	L1	P16	C4	Nippobare	Root	TSB	1	Rice	WildType
L1P16C5	AGACTATACTCCGTCC	AACMGGATTAGATACCCKG	ACGTCATCCCCACCTTCC	AGACTATACT	CCGTCC	L1	P16	C5	Nippobare	Root	TSB	1	Rice	WildType
L1P16C6	AGCGTCGTCTCCGTCC	AACMGGATTAGATACCCKG	ACGTCATCCCCACCTTCC	AGCGTCGTCT	CCGTCC	L1	P16	C6	Nippobare	Root	TSB	1	Rice	WildType
L1P16C7	AGTACGCTATCCGTCC	AACMGGATTAGATACCCKG	ACGTCATCCCCACCTTCC	AGTACGCTAT	CCGTCC	L1	P16	C7	Nippobare	Root	TSB	1	Rice	WildType
L1P16C8	CACGCTACGACCGTCC	AACMGGATTAGATACCCKG	ACGTCATCCCCACCTTCC	CACGCTACGA	CCGTCC	L1	P16	C8	Nippobare	Root	TSB	1	Rice	WildType
L1P16C9	CACGCTACGTCCGTCC	AACMGGATTAGATACCCKG	ACGTCATCCCCACCTTCC	CACGCTACGT	CCGTCC	L1	P16	C9	Nippobare	Root	TSB	1	Rice	WildType
L1P16C10	CAGTAGACGTCCGTCC	AACMGGATTAGATACCCKG	ACGTCATCCCCACCTTCC	CAGTAGACGT	CCGTCC	L1	P16	C10	Nippobare	Root	TSB	1	Rice	WildType
L1P16C11	CGACGTGACTCCGTCC	AACMGGATTAGATACCCKG	ACGTCATCCCCACCTTCC	CGACGTGACT	CCGTCC	L1	P16	C11	Nippobare	Root	TSB	1	Rice	WildType
L1P16C12	CAGTCTCTAGCCGTCC	AACMGGATTAGATACCCKG	ACGTCATCCCCACCTTCC	CAGTCTCTAG	CCGTCC	L1	P16	C12	Nippobare	Root	TSB	1	Rice	WildType
L1P16D1	TACACGTGATCCGTCC	AACMGGATTAGATACCCKG	ACGTCATCCCCACCTTCC	TACACGTGAT	CCGTCC	L1	P16	D1	Nippobare	Root	TSB	1	Rice	WildType
L1P16D2	TACAGATCGTCCGTCC	AACMGGATTAGATACCCKG	ACGTCATCCCCACCTTCC	TACAGATCGT	CCGTCC	L1	P16	D2	Nippobare	Root	TSB	1	Rice	WildType
L1P16D3	TACGCTGTCTCCGTCC	AACMGGATTAGATACCCKG	ACGTCATCCCCACCTTCC	TACGCTGTCT	CCGTCC	L1	P16	D3	Nippobare	Root	TSB	1	Rice	WildType
L1P16D4	TAGTGTAGATCCGTCC	AACMGGATTAGATACCCKG	ACGTCATCCCCACCTTCC	TAGTGTAGAT	CCGTCC	L1	P16	D4	Nippobare	Root	TSB	1	Rice	WildType
L1P16D5	TCGATCACGTCCGTCC	AACMGGATTAGATACCCKG	ACGTCATCCCCACCTTCC	TCGATCACGT	CCGTCC	L1	P16	D5	Nippobare	Root	TSB	1	Rice	WildType
L1P16D6	TCGCACTAGTCCGTCC	AACMGGATTAGATACCCKG	ACGTCATCCCCACCTTCC	TCGCACTAGT	CCGTCC	L1	P16	D6	Nippobare	Root	TSB	1	Rice	WildType
L1P16D7	TCTAGCGACTCCGTCC	AACMGGATTAGATACCCKG	ACGTCATCCCCACCTTCC	TCTAGCGACT	CCGTCC	L1	P16	D7	Nippobare	Root	TSB	1	Rice	WildType
L1P16D8	CACGTGTATACCGTCC	AACMGGATTAGATACCCKG	ACGTCATCCCCACCTTCC	CACGTGTATA	CCGTCC	L1	P16	D8	Nippobare	Root	TSB	1	Rice	WildType
L1P16D9	TGACGTATGTCCGTCC	AACMGGATTAGATACCCKG	ACGTCATCCCCACCTTCC	TGACGTATGT	CCGTCC	L1	P16	D9	Nippobare	Root	TSB	1	Rice	WildType
L1P16D10	CACTACGATGCCGTCC	AACMGGATTAGATACCCKG	ACGTCATCCCCACCTTCC	CACTACGATG	CCGTCC	L1	P16	D10	Nippobare	Root	TSB	1	Rice	WildType
L1P16D11	ACAGTATATACCGTCC	AACMGGATTAGATACCCKG	ACGTCATCCCCACCTTCC	ACAGTATATA	CCGTCC	L1	P16	D11	Nippobare	Root	TSB	1	Rice	WildType
L1P16D12	ACGCGATCGACCGTCC	AACMGGATTAGATACCCKG	ACGTCATCCCCACCTTCC	ACGCGATCGA	CCGTCC	L1	P16	D12	Nippobare	Root	TSB	1	Rice	WildType
L1P16E1	ACTAGCAGTACCGTCC	AACMGGATTAGATACCCKG	ACGTCATCCCCACCTTCC	ACTAGCAGTA	CCGTCC	L1	P16	E1	Nippobare	Root	TSB	1	Rice	WildType
L1P16E2	AGCTCACGTACCGTCC	AACMGGATTAGATACCCKG	ACGTCATCCCCACCTTCC	AGCTCACGTA	CCGTCC	L1	P16	E2	Nippobare	Root	TSB	1	Rice	WildType
L1P16E3	AGTATACATACCGTCC	AACMGGATTAGATACCCKG	ACGTCATCCCCACCTTCC	AGTATACATA	CCGTCC	L1	P16	E3	Nippobare	Root	TSB	1	Rice	WildType
L1P16E4	AGTCGAGAGACCGTCC	AACMGGATTAGATACCCKG	ACGTCATCCCCACCTTCC	AGTCGAGAGA	CCGTCC	L1	P16	E4	Nippobare	Root	TSB	1	Rice	WildType
L1P16E5	AGTGCTACGACCGTCC	AACMGGATTAGATACCCKG	ACGTCATCCCCACCTTCC	AGTGCTACGA	CCGTCC	L1	P16	E5	Nippobare	Root	TSB	1	Rice	WildType
L1P16E6	CGATCGTATACCGTCC	AACMGGATTAGATACCCKG	ACGTCATCCCCACCTTCC	CGATCGTATA	CCGTCC	L1	P16	E6	Nippobare	Root	TSB	1	Rice	WildType
L1P16E7	CGCAGTACGACCGTCC	AACMGGATTAGATACCCKG	ACGTCATCCCCACCTTCC	CGCAGTACGA	CCGTCC	L1	P16	E7	Nippobare	Root	TSB	1	Rice	WildType
L1P16E8	CGCGTATACACCGTCC	AACMGGATTAGATACCCKG	ACGTCATCCCCACCTTCC	CGCGTATACA	CCGTCC	L1	P16	E8	Nippobare	Root	TSB	1	Rice	WildType
L1P16E9	CGTACAGTCACCGTCC	AACMGGATTAGATACCCKG	ACGTCATCCCCACCTTCC	CGTACAGTCA	CCGTCC	L1	P16	E9	Nippobare	Root	TSB	1	Rice	WildType
L1P16E10	CGTACTCAGACCGTCC	AACMGGATTAGATACCCKG	ACGTCATCCCCACCTTCC	CGTACTCAGA	CCGTCC	L1	P16	E10	Nippobare	Root	TSB	1	Rice	WildType
L1P16E11	CTACGCTCTACCGTCC	AACMGGATTAGATACCCKG	ACGTCATCCCCACCTTCC	CTACGCTCTA	CCGTCC	L1	P16	E11	Nippobare	Root	TSB	1	Rice	WildType
L1P16E12	CTATAGCGTACCGTCC	AACMGGATTAGATACCCKG	ACGTCATCCCCACCTTCC	CTATAGCGTA	CCGTCC	L1	P16	E12	Nippobare	Root	TSB	1	Rice	WildType
L1P16F1	TACGTCATCACCGTCC	AACMGGATTAGATACCCKG	ACGTCATCCCCACCTTCC	TACGTCATCA	CCGTCC	L1	P16	F1	Nippobare	Root	TSB	1	Rice	WildType
L1P16F2	TAGTCGCATACCGTCC	AACMGGATTAGATACCCKG	ACGTCATCCCCACCTTCC	TAGTCGCATA	CCGTCC	L1	P16	F2	Nippobare	Root	TSB	1	Rice	WildType
L1P16F3	TATATATACACCGTCC	AACMGGATTAGATACCCKG	ACGTCATCCCCACCTTCC	TATATATACA	CCGTCC	L1	P16	F3	Nippobare	Root	TSB	1	Rice	WildType
L1P16F4	TATGCTAGTACCGTCC	AACMGGATTAGATACCCKG	ACGTCATCCCCACCTTCC	TATGCTAGTA	CCGTCC	L1	P16	F4	Nippobare	Root	TSB	1	Rice	WildType
L1P16F5	TCACGCGAGACCGTCC	AACMGGATTAGATACCCKG	ACGTCATCCCCACCTTCC	TCACGCGAGA	CCGTCC	L1	P16	F5	Nippobare	Root	TSB	1	Rice	WildType
L1P16F6	TCGATAGTGACCGTCC	AACMGGATTAGATACCCKG	ACGTCATCCCCACCTTCC	TCGATAGTGA	CCGTCC	L1	P16	F6	Nippobare	Root	TSB	1	Rice	WildType
L1P16F7	TCGCTGCGTACCGTCC	AACMGGATTAGATACCCKG	ACGTCATCCCCACCTTCC	TCGCTGCGTA	CCGTCC	L1	P16	F7	Nippobare	Root	TSB	1	Rice	WildType
L1P16F8	TCTGACGTCACCGTCC	AACMGGATTAGATACCCKG	ACGTCATCCCCACCTTCC	TCTGACGTCA	CCGTCC	L1	P16	F8	Nippobare	Root	TSB	1	Rice	WildType
L1P16F9	TGAGTCAGTACCGTCC	AACMGGATTAGATACCCKG	ACGTCATCCCCACCTTCC	TGAGTCAGTA	CCGTCC	L1	P16	F9	Nippobare	Root	TSB	1	Rice	WildType
L1P16F10	CACTATACTCCCGTCC	AACMGGATTAGATACCCKG	ACGTCATCCCCACCTTCC	CACTATACTC	CCGTCC	L1	P16	F10	Nippobare	Root	TSB	1	Rice	WildType
L1P16F11	TGTCACACGACCGTCC	AACMGGATTAGATACCCKG	ACGTCATCCCCACCTTCC	TGTCACACGA	CCGTCC	L1	P16	F11	Nippobare	Root	TSB	1	Rice	WildType
L1P16F12	TGTCGTCGCACCGTCC	AACMGGATTAGATACCCKG	ACGTCATCCCCACCTTCC	TGTCGTCGCA	CCGTCC	L1	P16	F12	Nippobare	Root	TSB	1	Rice	WildType
L1P16G1	ACACATACGCCCGTCC	AACMGGATTAGATACCCKG	ACGTCATCCCCACCTTCC	ACACATACGC	CCGTCC	L1	P16	G1	Nippobare	Root	TSB	1	Rice	WildType
L1P16G2	ACAGTCGTGCCCGTCC	AACMGGATTAGATACCCKG	ACGTCATCCCCACCTTCC	ACAGTCGTGC	CCGTCC	L1	P16	G2	Nippobare	Root	TSB	1	Rice	WildType
L1P16G3	ACATGACGACCCGTCC	AACMGGATTAGATACCCKG	ACGTCATCCCCACCTTCC	ACATGACGAC	CCGTCC	L1	P16	G3	Nippobare	Root	TSB	1	Rice	WildType
L1P16G4	ACGACAGCTCCCGTCC	AACMGGATTAGATACCCKG	ACGTCATCCCCACCTTCC	ACGACAGCTC	CCGTCC	L1	P16	G4	Nippobare	Root	TSB	1	Rice	WildType
L1P16G5	ACGTCTCATCCCGTCC	AACMGGATTAGATACCCKG	ACGTCATCCCCACCTTCC	ACGTCTCATC	CCGTCC	L1	P16	G5	Nippobare	Root	TSB	1	Rice	WildType
L1P16G6	ACTCATCTACCCGTCC	AACMGGATTAGATACCCKG	ACGTCATCCCCACCTTCC	ACTCATCTAC	CCGTCC	L1	P16	G6	Nippobare	Root	TSB	1	Rice	WildType
L1P16G7	ACTCGCGCACCCGTCC	AACMGGATTAGATACCCKG	ACGTCATCCCCACCTTCC	ACTCGCGCAC	CCGTCC	L1	P16	G7	Nippobare	Root	TSB	1	Rice	WildType
L1P16G8	AGAGCGTCACCCGTCC	AACMGGATTAGATACCCKG	ACGTCATCCCCACCTTCC	AGAGCGTCAC	CCGTCC	L1	P16	G8	Nippobare	Root	TSB	1	Rice	WildType
L1P16G9	AGCGACTAGCCCGTCC	AACMGGATTAGATACCCKG	ACGTCATCCCCACCTTCC	AGCGACTAGC	CCGTCC	L1	P16	G9	Nippobare	Root	TSB	1	Rice	WildType
L1P16G10	CAGCGTACTGCCGTCC	AACMGGATTAGATACCCKG	ACGTCATCCCCACCTTCC	CAGCGTACTG	CCGTCC	L1	P16	G10	Nippobare	Root	TSB	1	Rice	WildType
L1P16G11	AGTGACACACCCGTCC	AACMGGATTAGATACCCKG	ACGTCATCCCCACCTTCC	AGTGACACAC	CCGTCC	L1	P16	G11	Nippobare	Root	TSB	1	Rice	WildType
L1P16G12	AGTGTATGTCCCGTCC	AACMGGATTAGATACCCKG	ACGTCATCCCCACCTTCC	AGTGTATGTC	CCGTCC	L1	P16	G12	Nippobare	Root	TSB	1	Rice	WildType
L1P16H1	ATAGATAGACCCGTCC	AACMGGATTAGATACCCKG	ACGTCATCCCCACCTTCC	ATAGATAGAC	CCGTCC	L1	P16	H1	Nippobare	Root	TSB	1	Rice	WildType
L1P16H2	ATATAGTCGCCCGTCC	AACMGGATTAGATACCCKG	ACGTCATCCCCACCTTCC	ATATAGTCGC	CCGTCC	L1	P16	H2	Nippobare	Root	TSB	1	Rice	WildType
L1P16H3	ATCTACTGACCCGTCC	AACMGGATTAGATACCCKG	ACGTCATCCCCACCTTCC	ATCTACTGAC	CCGTCC	L1	P16	H3	Nippobare	Root	TSB	1	Rice	WildType
L1P16H4	CACGTAGATCCCGTCC	AACMGGATTAGATACCCKG	ACGTCATCCCCACCTTCC	CACGTAGATC	CCGTCC	L1	P16	H4	Nippobare	Root	TSB	1	Rice	WildType
L1P16H5	CACGTCTCGCCCGTCC	AACMGGATTAGATACCCKG	ACGTCATCCCCACCTTCC	CACGTCTCGC	CCGTCC	L1	P16	H5	Nippobare	Root	TSB	1	Rice	WildType
L1P16H6	CATACTCTACCCGTCC	AACMGGATTAGATACCCKG	ACGTCATCCCCACCTTCC	CATACTCTAC	CCGTCC	L1	P16	H6	Nippobare	Root	TSB	1	Rice	WildType
L1P16H7	CGACACTATCCCGTCC	AACMGGATTAGATACCCKG	ACGTCATCCCCACCTTCC	CGACACTATC	CCGTCC	L1	P16	H7	Nippobare	Root	TSB	1	Rice	WildType
L1P16H8	CGAGACGCGCCCGTCC	AACMGGATTAGATACCCKG	ACGTCATCCCCACCTTCC	CGAGACGCGC	CCGTCC	L1	P16	H8	Nippobare	Root	TSB	1	Rice	WildType
L1P16H9	CGTATGCGACCCGTCC	AACMGGATTAGATACCCKG	ACGTCATCCCCACCTTCC	CGTATGCGAC	CCGTCC	L1	P16	H9	Nippobare	Root	TSB	1	Rice	WildType
L1P16H10	CGTCGATCTCCCGTCC	AACMGGATTAGATACCCKG	ACGTCATCCCCACCTTCC	CGTCGATCTC	CCGTCC	L1	P16	H10	Nippobare	Root	TSB	1	Rice	WildType
L1P16H11	CTACGACTGCCCGTCC	AACMGGATTAGATACCCKG	ACGTCATCCCCACCTTCC	CTACGACTGC	CCGTCC	L1	P16	H11	Nippobare	Root	TSB	1	Rice	WildType
L1P16H12	CTAGTCACTCCCGTCC	AACMGGATTAGATACCCKG	ACGTCATCCCCACCTTCC	CTAGTCACTC	CCGTCC	L1	P16	H12	Nippobare	Root	TSB	1	Rice	WildType
L1P17A1	ACGCTCGACATCTCTC	AACMGGATTAGATACCCKG	ACGTCATCCCCACCTTCC	ACGCTCGACA	TCTCTC	L1	P17	A1	Nippobare	Root	TSB	1	Rice	WildType
L1P17A2	AGACGCACTCTCTCTC	AACMGGATTAGATACCCKG	ACGTCATCCCCACCTTCC	AGACGCACTC	TCTCTC	L1	P17	A2	Nippobare	Root	TSB	1	Rice	WildType
L1P17A3	AGCACTGTAGTCTCTC	AACMGGATTAGATACCCKG	ACGTCATCCCCACCTTCC	AGCACTGTAG	TCTCTC	L1	P17	A3	Nippobare	Root	TSB	1	Rice	WildType
L1P17A4	ATCAGACACGTCTCTC	AACMGGATTAGATACCCKG	ACGTCATCCCCACCTTCC	ATCAGACACG	TCTCTC	L1	P17	A4	Nippobare	Root	TSB	1	Rice	WildType
L1P17A5	ATATCGCGAGTCTCTC	AACMGGATTAGATACCCKG	ACGTCATCCCCACCTTCC	ATATCGCGAG	TCTCTC	L1	P17	A5	Nippobare	Root	TSB	1	Rice	WildType
L1P17A6	CACGAGACAGTCTCTC	AACMGGATTAGATACCCKG	ACGTCATCCCCACCTTCC	CACGAGACAG	TCTCTC	L1	P17	A6	Nippobare	Root	TSB	1	Rice	WildType
L1P17A7	CTCGCGTGTCTCTCTC	AACMGGATTAGATACCCKG	ACGTCATCCCCACCTTCC	CTCGCGTGTC	TCTCTC	L1	P17	A7	Nippobare	Root	TSB	1	Rice	WildType
L1P17A8	TAGTATCAGCTCTCTC	AACMGGATTAGATACCCKG	ACGTCATCCCCACCTTCC	TAGTATCAGC	TCTCTC	L1	P17	A8	Nippobare	Root	TSB	1	Rice	WildType
L1P17A9	TCTCTATGCGTCTCTC	AACMGGATTAGATACCCKG	ACGTCATCCCCACCTTCC	TCTCTATGCG	TCTCTC	L1	P17	A9	Nippobare	Root	TSB	1	Rice	WildType
L1P17A10	TGATACGTCTTCTCTC	AACMGGATTAGATACCCKG	ACGTCATCCCCACCTTCC	TGATACGTCT	TCTCTC	L1	P17	A10	Nippobare	Root	TSB	1	Rice	WildType
L1P17A11	TACTGAGCTATCTCTC	AACMGGATTAGATACCCKG	ACGTCATCCCCACCTTCC	TACTGAGCTA	TCTCTC	L1	P17	A11	Nippobare	Root	TSB	1	Rice	WildType
L1P17A12	CATAGTAGTGTCTCTC	AACMGGATTAGATACCCKG	ACGTCATCCCCACCTTCC	CATAGTAGTG	TCTCTC	L1	P17	A12	Nippobare	Root	TSB	1	Rice	WildType
L1P17B1	CGAGAGATACTCTCTC	AACMGGATTAGATACCCKG	ACGTCATCCCCACCTTCC	CGAGAGATAC	TCTCTC	L1	P17	B1	Nippobare	Root	TSB	1	Rice	WildType
L1P17B2	ATACGACGTATCTCTC	AACMGGATTAGATACCCKG	ACGTCATCCCCACCTTCC	ATACGACGTA	TCTCTC	L1	P17	B2	Nippobare	Root	TSB	1	Rice	WildType
L1P17B3	TCACGTACTATCTCTC	AACMGGATTAGATACCCKG	ACGTCATCCCCACCTTCC	TCACGTACTA	TCTCTC	L1	P17	B3	Nippobare	Root	TSB	1	Rice	WildType
L1P17B4	CGTCTAGTACTCTCTC	AACMGGATTAGATACCCKG	ACGTCATCCCCACCTTCC	CGTCTAGTAC	TCTCTC	L1	P17	B4	Nippobare	Root	TSB	1	Rice	WildType
L1P17B5	TCTACGTAGCTCTCTC	AACMGGATTAGATACCCKG	ACGTCATCCCCACCTTCC	TCTACGTAGC	TCTCTC	L1	P17	B5	Nippobare	Root	TSB	1	Rice	WildType
L1P17B6	CACGCGAGTCTCTCTC	AACMGGATTAGATACCCKG	ACGTCATCCCCACCTTCC	CACGCGAGTC	TCTCTC	L1	P17	B6	Nippobare	Root	TSB	1	Rice	WildType
L1P17B7	ACGACTACAGTCTCTC	AACMGGATTAGATACCCKG	ACGTCATCCCCACCTTCC	ACGACTACAG	TCTCTC	L1	P17	B7	Nippobare	Root	TSB	1	Rice	WildType
L1P17B8	CGTAGACTAGTCTCTC	AACMGGATTAGATACCCKG	ACGTCATCCCCACCTTCC	CGTAGACTAG	TCTCTC	L1	P17	B8	Nippobare	Root	TSB	1	Rice	WildType
L1P17B9	TACGAGTATGTCTCTC	AACMGGATTAGATACCCKG	ACGTCATCCCCACCTTCC	TACGAGTATG	TCTCTC	L1	P17	B9	Nippobare	Root	TSB	1	Rice	WildType
L1P17B10	TACTCTCGTGTCTCTC	AACMGGATTAGATACCCKG	ACGTCATCCCCACCTTCC	TACTCTCGTG	TCTCTC	L1	P17	B10	Nippobare	Root	TSB	1	Rice	WildType
L1P17B11	TAGAGACGAGTCTCTC	AACMGGATTAGATACCCKG	ACGTCATCCCCACCTTCC	TAGAGACGAG	TCTCTC	L1	P17	B11	Nippobare	Root	TSB	1	Rice	WildType
L1P17B12	TCGTCGCTCGTCTCTC	AACMGGATTAGATACCCKG	ACGTCATCCCCACCTTCC	TCGTCGCTCG	TCTCTC	L1	P17	B12	Nippobare	Root	TSB	1	Rice	WildType
L1P17C1	ACATACGCGTTCTCTC	AACMGGATTAGATACCCKG	ACGTCATCCCCACCTTCC	ACATACGCGT	TCTCTC	L1	P17	C1	Nippobare	Root	TSB	1	Rice	WildType
L1P17C2	ACGCGAGTATTCTCTC	AACMGGATTAGATACCCKG	ACGTCATCCCCACCTTCC	ACGCGAGTAT	TCTCTC	L1	P17	C2	Nippobare	Root	TSB	1	Rice	WildType
L1P17C3	ACTACTATGTTCTCTC	AACMGGATTAGATACCCKG	ACGTCATCCCCACCTTCC	ACTACTATGT	TCTCTC	L1	P17	C3	Nippobare	Root	TSB	1	Rice	WildType
L1P17C4	ACTGTACAGTTCTCTC	AACMGGATTAGATACCCKG	ACGTCATCCCCACCTTCC	ACTGTACAGT	TCTCTC	L1	P17	C4	Nippobare	Root	TSB	1	Rice	WildType
L1P17C5	AGACTATACTTCTCTC	AACMGGATTAGATACCCKG	ACGTCATCCCCACCTTCC	AGACTATACT	TCTCTC	L1	P17	C5	Nippobare	Root	TSB	1	Rice	WildType
L1P17C6	AGCGTCGTCTTCTCTC	AACMGGATTAGATACCCKG	ACGTCATCCCCACCTTCC	AGCGTCGTCT	TCTCTC	L1	P17	C6	Nippobare	Root	TSB	1	Rice	WildType
L1P17C7	AGTACGCTATTCTCTC	AACMGGATTAGATACCCKG	ACGTCATCCCCACCTTCC	AGTACGCTAT	TCTCTC	L1	P17	C7	Nippobare	Root	TSB	1	Rice	WildType
L1P17C8	CACGCTACGATCTCTC	AACMGGATTAGATACCCKG	ACGTCATCCCCACCTTCC	CACGCTACGA	TCTCTC	L1	P17	C8	Nippobare	Root	TSB	1	Rice	WildType
L1P17C9	CACGCTACGTTCTCTC	AACMGGATTAGATACCCKG	ACGTCATCCCCACCTTCC	CACGCTACGT	TCTCTC	L1	P17	C9	Nippobare	Root	TSB	1	Rice	WildType
L1P17C10	CAGTAGACGTTCTCTC	AACMGGATTAGATACCCKG	ACGTCATCCCCACCTTCC	CAGTAGACGT	TCTCTC	L1	P17	C10	Nippobare	Root	TSB	1	Rice	WildType
L1P17C11	CGACGTGACTTCTCTC	AACMGGATTAGATACCCKG	ACGTCATCCCCACCTTCC	CGACGTGACT	TCTCTC	L1	P17	C11	Nippobare	Root	TSB	1	Rice	WildType
L1P17C12	CAGTCTCTAGTCTCTC	AACMGGATTAGATACCCKG	ACGTCATCCCCACCTTCC	CAGTCTCTAG	TCTCTC	L1	P17	C12	Nippobare	Root	TSB	1	Rice	WildType
L1P17D1	TACACGTGATTCTCTC	AACMGGATTAGATACCCKG	ACGTCATCCCCACCTTCC	TACACGTGAT	TCTCTC	L1	P17	D1	Nippobare	Root	TSB	1	Rice	WildType
L1P17D2	TACAGATCGTTCTCTC	AACMGGATTAGATACCCKG	ACGTCATCCCCACCTTCC	TACAGATCGT	TCTCTC	L1	P17	D2	Nippobare	Root	TSB	1	Rice	WildType
L1P17D3	TACGCTGTCTTCTCTC	AACMGGATTAGATACCCKG	ACGTCATCCCCACCTTCC	TACGCTGTCT	TCTCTC	L1	P17	D3	Nippobare	Root	TSB	1	Rice	WildType
L1P17D4	TAGTGTAGATTCTCTC	AACMGGATTAGATACCCKG	ACGTCATCCCCACCTTCC	TAGTGTAGAT	TCTCTC	L1	P17	D4	Nippobare	Root	TSB	1	Rice	WildType
L1P17D5	TCGATCACGTTCTCTC	AACMGGATTAGATACCCKG	ACGTCATCCCCACCTTCC	TCGATCACGT	TCTCTC	L1	P17	D5	Nippobare	Root	TSB	1	Rice	WildType
L1P17D6	TCGCACTAGTTCTCTC	AACMGGATTAGATACCCKG	ACGTCATCCCCACCTTCC	TCGCACTAGT	TCTCTC	L1	P17	D6	Nippobare	Root	TSB	1	Rice	WildType
L1P17D7	TCTAGCGACTTCTCTC	AACMGGATTAGATACCCKG	ACGTCATCCCCACCTTCC	TCTAGCGACT	TCTCTC	L1	P17	D7	Nippobare	Root	TSB	1	Rice	WildType
L1P17D8	CACGTGTATATCTCTC	AACMGGATTAGATACCCKG	ACGTCATCCCCACCTTCC	CACGTGTATA	TCTCTC	L1	P17	D8	Nippobare	Root	TSB	1	Rice	WildType
L1P17D9	TGACGTATGTTCTCTC	AACMGGATTAGATACCCKG	ACGTCATCCCCACCTTCC	TGACGTATGT	TCTCTC	L1	P17	D9	Nippobare	Root	TSB	1	Rice	WildType
L1P17D10	CACTACGATGTCTCTC	AACMGGATTAGATACCCKG	ACGTCATCCCCACCTTCC	CACTACGATG	TCTCTC	L1	P17	D10	Nippobare	Root	TSB	1	Rice	WildType
L1P17D11	ACAGTATATATCTCTC	AACMGGATTAGATACCCKG	ACGTCATCCCCACCTTCC	ACAGTATATA	TCTCTC	L1	P17	D11	Nippobare	Root	TSB	1	Rice	WildType
L1P17D12	ACGCGATCGATCTCTC	AACMGGATTAGATACCCKG	ACGTCATCCCCACCTTCC	ACGCGATCGA	TCTCTC	L1	P17	D12	Nippobare	Root	TSB	1	Rice	WildType
L1P17E1	ACTAGCAGTATCTCTC	AACMGGATTAGATACCCKG	ACGTCATCCCCACCTTCC	ACTAGCAGTA	TCTCTC	L1	P17	E1	Nippobare	Root	TSB	1	Rice	WildType
L1P17E2	AGCTCACGTATCTCTC	AACMGGATTAGATACCCKG	ACGTCATCCCCACCTTCC	AGCTCACGTA	TCTCTC	L1	P17	E2	Nippobare	Root	TSB	1	Rice	WildType
L1P17E3	AGTATACATATCTCTC	AACMGGATTAGATACCCKG	ACGTCATCCCCACCTTCC	AGTATACATA	TCTCTC	L1	P17	E3	Nippobare	Root	TSB	1	Rice	WildType
L1P17E4	AGTCGAGAGATCTCTC	AACMGGATTAGATACCCKG	ACGTCATCCCCACCTTCC	AGTCGAGAGA	TCTCTC	L1	P17	E4	Nippobare	Root	TSB	1	Rice	WildType
L1P17E5	AGTGCTACGATCTCTC	AACMGGATTAGATACCCKG	ACGTCATCCCCACCTTCC	AGTGCTACGA	TCTCTC	L1	P17	E5	Nippobare	Root	TSB	1	Rice	WildType
L1P17E6	CGATCGTATATCTCTC	AACMGGATTAGATACCCKG	ACGTCATCCCCACCTTCC	CGATCGTATA	TCTCTC	L1	P17	E6	Nippobare	Root	TSB	1	Rice	WildType
L1P17E7	CGCAGTACGATCTCTC	AACMGGATTAGATACCCKG	ACGTCATCCCCACCTTCC	CGCAGTACGA	TCTCTC	L1	P17	E7	Nippobare	Root	TSB	1	Rice	WildType
L1P17E8	CGCGTATACATCTCTC	AACMGGATTAGATACCCKG	ACGTCATCCCCACCTTCC	CGCGTATACA	TCTCTC	L1	P17	E8	Nippobare	Root	TSB	1	Rice	WildType
L1P17E9	CGTACAGTCATCTCTC	AACMGGATTAGATACCCKG	ACGTCATCCCCACCTTCC	CGTACAGTCA	TCTCTC	L1	P17	E9	Nippobare	Root	TSB	1	Rice	WildType
L1P17E10	CGTACTCAGATCTCTC	AACMGGATTAGATACCCKG	ACGTCATCCCCACCTTCC	CGTACTCAGA	TCTCTC	L1	P17	E10	Nippobare	Root	TSB	1	Rice	WildType
L1P17E11	CTACGCTCTATCTCTC	AACMGGATTAGATACCCKG	ACGTCATCCCCACCTTCC	CTACGCTCTA	TCTCTC	L1	P17	E11	Nippobare	Root	TSB	1	Rice	WildType
L1P17E12	CTATAGCGTATCTCTC	AACMGGATTAGATACCCKG	ACGTCATCCCCACCTTCC	CTATAGCGTA	TCTCTC	L1	P17	E12	Nippobare	Root	TSB	1	Rice	WildType
L1P17F1	TACGTCATCATCTCTC	AACMGGATTAGATACCCKG	ACGTCATCCCCACCTTCC	TACGTCATCA	TCTCTC	L1	P17	F1	Nippobare	Root	TSB	1	Rice	WildType
L1P17F2	TAGTCGCATATCTCTC	AACMGGATTAGATACCCKG	ACGTCATCCCCACCTTCC	TAGTCGCATA	TCTCTC	L1	P17	F2	Nippobare	Root	TSB	1	Rice	WildType
L1P17F3	TATATATACATCTCTC	AACMGGATTAGATACCCKG	ACGTCATCCCCACCTTCC	TATATATACA	TCTCTC	L1	P17	F3	Nippobare	Root	TSB	1	Rice	WildType
L1P17F4	TATGCTAGTATCTCTC	AACMGGATTAGATACCCKG	ACGTCATCCCCACCTTCC	TATGCTAGTA	TCTCTC	L1	P17	F4	Nippobare	Root	TSB	1	Rice	WildType
L1P17F5	TCACGCGAGATCTCTC	AACMGGATTAGATACCCKG	ACGTCATCCCCACCTTCC	TCACGCGAGA	TCTCTC	L1	P17	F5	Nippobare	Root	TSB	1	Rice	WildType
L1P17F6	TCGATAGTGATCTCTC	AACMGGATTAGATACCCKG	ACGTCATCCCCACCTTCC	TCGATAGTGA	TCTCTC	L1	P17	F6	Nippobare	Root	TSB	1	Rice	WildType
L1P17F7	TCGCTGCGTATCTCTC	AACMGGATTAGATACCCKG	ACGTCATCCCCACCTTCC	TCGCTGCGTA	TCTCTC	L1	P17	F7	Nippobare	Root	TSB	1	Rice	WildType
L1P17F8	TCTGACGTCATCTCTC	AACMGGATTAGATACCCKG	ACGTCATCCCCACCTTCC	TCTGACGTCA	TCTCTC	L1	P17	F8	Nippobare	Root	TSB	1	Rice	WildType
L1P17F9	TGAGTCAGTATCTCTC	AACMGGATTAGATACCCKG	ACGTCATCCCCACCTTCC	TGAGTCAGTA	TCTCTC	L1	P17	F9	Nippobare	Root	TSB	1	Rice	WildType
L1P17F10	CACTATACTCTCTCTC	AACMGGATTAGATACCCKG	ACGTCATCCCCACCTTCC	CACTATACTC	TCTCTC	L1	P17	F10	Nippobare	Root	TSB	1	Rice	WildType
L1P17F11	TGTCACACGATCTCTC	AACMGGATTAGATACCCKG	ACGTCATCCCCACCTTCC	TGTCACACGA	TCTCTC	L1	P17	F11	Nippobare	Root	TSB	1	Rice	WildType
L1P17F12	TGTCGTCGCATCTCTC	AACMGGATTAGATACCCKG	ACGTCATCCCCACCTTCC	TGTCGTCGCA	TCTCTC	L1	P17	F12	Nippobare	Root	TSB	1	Rice	WildType
L1P17G1	ACACATACGCTCTCTC	AACMGGATTAGATACCCKG	ACGTCATCCCCACCTTCC	ACACATACGC	TCTCTC	L1	P17	G1	Nippobare	Root	TSB	1	Rice	WildType
L1P17G2	ACAGTCGTGCTCTCTC	AACMGGATTAGATACCCKG	ACGTCATCCCCACCTTCC	ACAGTCGTGC	TCTCTC	L1	P17	G2	Nippobare	Root	TSB	1	Rice	WildType
L1P17G3	ACATGACGACTCTCTC	AACMGGATTAGATACCCKG	ACGTCATCCCCACCTTCC	ACATGACGAC	TCTCTC	L1	P17	G3	Nippobare	Root	TSB	1	Rice	WildType
L1P17G4	ACGACAGCTCTCTCTC	AACMGGATTAGATACCCKG	ACGTCATCCCCACCTTCC	ACGACAGCTC	TCTCTC	L1	P17	G4	Nippobare	Root	TSB	1	Rice	WildType
L1P17G5	ACGTCTCATCTCTCTC	AACMGGATTAGATACCCKG	ACGTCATCCCCACCTTCC	ACGTCTCATC	TCTCTC	L1	P17	G5	Nippobare	Root	TSB	1	Rice	WildType
L1P17G6	ACTCATCTACTCTCTC	AACMGGATTAGATACCCKG	ACGTCATCCCCACCTTCC	ACTCATCTAC	TCTCTC	L1	P17	G6	Nippobare	Root	TSB	1	Rice	WildType
L1P17G7	ACTCGCGCACTCTCTC	AACMGGATTAGATACCCKG	ACGTCATCCCCACCTTCC	ACTCGCGCAC	TCTCTC	L1	P17	G7	Nippobare	Root	TSB	1	Rice	WildType
L1P17G8	AGAGCGTCACTCTCTC	AACMGGATTAGATACCCKG	ACGTCATCCCCACCTTCC	AGAGCGTCAC	TCTCTC	L1	P17	G8	Nippobare	Root	TSB	1	Rice	WildType
L1P17G9	AGCGACTAGCTCTCTC	AACMGGATTAGATACCCKG	ACGTCATCCCCACCTTCC	AGCGACTAGC	TCTCTC	L1	P17	G9	Nippobare	Root	TSB	1	Rice	WildType
L1P17G10	CAGCGTACTGTCTCTC	AACMGGATTAGATACCCKG	ACGTCATCCCCACCTTCC	CAGCGTACTG	TCTCTC	L1	P17	G10	Nippobare	Root	TSB	1	Rice	WildType
L1P17G11	AGTGACACACTCTCTC	AACMGGATTAGATACCCKG	ACGTCATCCCCACCTTCC	AGTGACACAC	TCTCTC	L1	P17	G11	Nippobare	Root	TSB	1	Rice	WildType
L1P17G12	AGTGTATGTCTCTCTC	AACMGGATTAGATACCCKG	ACGTCATCCCCACCTTCC	AGTGTATGTC	TCTCTC	L1	P17	G12	Nippobare	Root	TSB	1	Rice	WildType
L1P17H1	ATAGATAGACTCTCTC	AACMGGATTAGATACCCKG	ACGTCATCCCCACCTTCC	ATAGATAGAC	TCTCTC	L1	P17	H1	Nippobare	Root	TSB	1	Rice	WildType
L1P17H2	ATATAGTCGCTCTCTC	AACMGGATTAGATACCCKG	ACGTCATCCCCACCTTCC	ATATAGTCGC	TCTCTC	L1	P17	H2	Nippobare	Root	TSB	1	Rice	WildType
L1P17H3	ATCTACTGACTCTCTC	AACMGGATTAGATACCCKG	ACGTCATCCCCACCTTCC	ATCTACTGAC	TCTCTC	L1	P17	H3	Nippobare	Root	TSB	1	Rice	WildType
L1P17H4	CACGTAGATCTCTCTC	AACMGGATTAGATACCCKG	ACGTCATCCCCACCTTCC	CACGTAGATC	TCTCTC	L1	P17	H4	Nippobare	Root	TSB	1	Rice	WildType
L1P17H5	CACGTCTCGCTCTCTC	AACMGGATTAGATACCCKG	ACGTCATCCCCACCTTCC	CACGTCTCGC	TCTCTC	L1	P17	H5	Nippobare	Root	TSB	1	Rice	WildType
L1P17H6	CATACTCTACTCTCTC	AACMGGATTAGATACCCKG	ACGTCATCCCCACCTTCC	CATACTCTAC	TCTCTC	L1	P17	H6	Nippobare	Root	TSB	1	Rice	WildType
L1P17H7	CGACACTATCTCTCTC	AACMGGATTAGATACCCKG	ACGTCATCCCCACCTTCC	CGACACTATC	TCTCTC	L1	P17	H7	Nippobare	Root	TSB	1	Rice	WildType
L1P17H8	CGAGACGCGCTCTCTC	AACMGGATTAGATACCCKG	ACGTCATCCCCACCTTCC	CGAGACGCGC	TCTCTC	L1	P17	H8	Nippobare	Root	TSB	1	Rice	WildType
L1P17H9	CGTATGCGACTCTCTC	AACMGGATTAGATACCCKG	ACGTCATCCCCACCTTCC	CGTATGCGAC	TCTCTC	L1	P17	H9	Nippobare	Root	TSB	1	Rice	WildType
L1P17H10	CGTCGATCTCTCTCTC	AACMGGATTAGATACCCKG	ACGTCATCCCCACCTTCC	CGTCGATCTC	TCTCTC	L1	P17	H10	Nippobare	Root	TSB	1	Rice	WildType
L1P17H11	CTACGACTGCTCTCTC	AACMGGATTAGATACCCKG	ACGTCATCCCCACCTTCC	CTACGACTGC	TCTCTC	L1	P17	H11	Nippobare	Root	TSB	1	Rice	WildType
L1P17H12	CTAGTCACTCTCTCTC	AACMGGATTAGATACCCKG	ACGTCATCCCCACCTTCC	CTAGTCACTC	TCTCTC	L1	P17	H12	Nippobare	Root	TSB	1	Rice	WildType
L1P18A1	ACGCTCGACAGTCCGC	AACMGGATTAGATACCCKG	ACGTCATCCCCACCTTCC	ACGCTCGACA	GTCCGC	L1	P18	A1	Nippobare	Root	TSB	1	Rice	WildType
L1P18A2	AGACGCACTCGTCCGC	AACMGGATTAGATACCCKG	ACGTCATCCCCACCTTCC	AGACGCACTC	GTCCGC	L1	P18	A2	Nippobare	Root	TSB	1	Rice	WildType
L1P18A3	AGCACTGTAGGTCCGC	AACMGGATTAGATACCCKG	ACGTCATCCCCACCTTCC	AGCACTGTAG	GTCCGC	L1	P18	A3	Nippobare	Root	TSB	1	Rice	WildType
L1P18A4	ATCAGACACGGTCCGC	AACMGGATTAGATACCCKG	ACGTCATCCCCACCTTCC	ATCAGACACG	GTCCGC	L1	P18	A4	Nippobare	Root	TSB	1	Rice	WildType
L1P18A5	ATATCGCGAGGTCCGC	AACMGGATTAGATACCCKG	ACGTCATCCCCACCTTCC	ATATCGCGAG	GTCCGC	L1	P18	A5	Nippobare	Root	TSB	1	Rice	WildType
L1P18A6	CACGAGACAGGTCCGC	AACMGGATTAGATACCCKG	ACGTCATCCCCACCTTCC	CACGAGACAG	GTCCGC	L1	P18	A6	Nippobare	Root	TSB	1	Rice	WildType
L1P18A7	CTCGCGTGTCGTCCGC	AACMGGATTAGATACCCKG	ACGTCATCCCCACCTTCC	CTCGCGTGTC	GTCCGC	L1	P18	A7	Nippobare	Root	TSB	1	Rice	WildType
L1P18A8	TAGTATCAGCGTCCGC	AACMGGATTAGATACCCKG	ACGTCATCCCCACCTTCC	TAGTATCAGC	GTCCGC	L1	P18	A8	Nippobare	Root	TSB	1	Rice	WildType
L1P18A9	TCTCTATGCGGTCCGC	AACMGGATTAGATACCCKG	ACGTCATCCCCACCTTCC	TCTCTATGCG	GTCCGC	L1	P18	A9	Nippobare	Root	TSB	1	Rice	WildType
L1P18A10	TGATACGTCTGTCCGC	AACMGGATTAGATACCCKG	ACGTCATCCCCACCTTCC	TGATACGTCT	GTCCGC	L1	P18	A10	Nippobare	Root	TSB	1	Rice	WildType
L1P18A11	TACTGAGCTAGTCCGC	AACMGGATTAGATACCCKG	ACGTCATCCCCACCTTCC	TACTGAGCTA	GTCCGC	L1	P18	A11	Nippobare	Root	TSB	1	Rice	WildType
L1P18A12	CATAGTAGTGGTCCGC	AACMGGATTAGATACCCKG	ACGTCATCCCCACCTTCC	CATAGTAGTG	GTCCGC	L1	P18	A12	Nippobare	Root	TSB	1	Rice	WildType
L1P18B1	CGAGAGATACGTCCGC	AACMGGATTAGATACCCKG	ACGTCATCCCCACCTTCC	CGAGAGATAC	GTCCGC	L1	P18	B1	Nippobare	Root	TSB	1	Rice	WildType
L1P18B2	ATACGACGTAGTCCGC	AACMGGATTAGATACCCKG	ACGTCATCCCCACCTTCC	ATACGACGTA	GTCCGC	L1	P18	B2	Nippobare	Root	TSB	1	Rice	WildType
L1P18B3	TCACGTACTAGTCCGC	AACMGGATTAGATACCCKG	ACGTCATCCCCACCTTCC	TCACGTACTA	GTCCGC	L1	P18	B3	Nippobare	Root	TSB	1	Rice	WildType
L1P18B4	CGTCTAGTACGTCCGC	AACMGGATTAGATACCCKG	ACGTCATCCCCACCTTCC	CGTCTAGTAC	GTCCGC	L1	P18	B4	Nippobare	Root	TSB	1	Rice	WildType
L1P18B5	TCTACGTAGCGTCCGC	AACMGGATTAGATACCCKG	ACGTCATCCCCACCTTCC	TCTACGTAGC	GTCCGC	L1	P18	B5	Nippobare	Root	TSB	1	Rice	WildType
L1P18B6	CACGCGAGTCGTCCGC	AACMGGATTAGATACCCKG	ACGTCATCCCCACCTTCC	CACGCGAGTC	GTCCGC	L1	P18	B6	Nippobare	Root	TSB	1	Rice	WildType
L1P18B7	ACGACTACAGGTCCGC	AACMGGATTAGATACCCKG	ACGTCATCCCCACCTTCC	ACGACTACAG	GTCCGC	L1	P18	B7	Nippobare	Root	TSB	1	Rice	WildType
L1P18B8	CGTAGACTAGGTCCGC	AACMGGATTAGATACCCKG	ACGTCATCCCCACCTTCC	CGTAGACTAG	GTCCGC	L1	P18	B8	Nippobare	Root	TSB	1	Rice	WildType
L1P18B9	TACGAGTATGGTCCGC	AACMGGATTAGATACCCKG	ACGTCATCCCCACCTTCC	TACGAGTATG	GTCCGC	L1	P18	B9	Nippobare	Root	TSB	1	Rice	WildType
L1P18B10	TACTCTCGTGGTCCGC	AACMGGATTAGATACCCKG	ACGTCATCCCCACCTTCC	TACTCTCGTG	GTCCGC	L1	P18	B10	Nippobare	Root	TSB	1	Rice	WildType
L1P18B11	TAGAGACGAGGTCCGC	AACMGGATTAGATACCCKG	ACGTCATCCCCACCTTCC	TAGAGACGAG	GTCCGC	L1	P18	B11	Nippobare	Root	TSB	1	Rice	WildType
L1P18B12	TCGTCGCTCGGTCCGC	AACMGGATTAGATACCCKG	ACGTCATCCCCACCTTCC	TCGTCGCTCG	GTCCGC	L1	P18	B12	Nippobare	Root	TSB	1	Rice	WildType
L1P18C1	ACATACGCGTGTCCGC	AACMGGATTAGATACCCKG	ACGTCATCCCCACCTTCC	ACATACGCGT	GTCCGC	L1	P18	C1	Nippobare	Root	TSB	1	Rice	WildType
L1P18C2	ACGCGAGTATGTCCGC	AACMGGATTAGATACCCKG	ACGTCATCCCCACCTTCC	ACGCGAGTAT	GTCCGC	L1	P18	C2	Nippobare	Root	TSB	1	Rice	WildType
L1P18C3	ACTACTATGTGTCCGC	AACMGGATTAGATACCCKG	ACGTCATCCCCACCTTCC	ACTACTATGT	GTCCGC	L1	P18	C3	Nippobare	Root	TSB	1	Rice	WildType
L1P18C4	ACTGTACAGTGTCCGC	AACMGGATTAGATACCCKG	ACGTCATCCCCACCTTCC	ACTGTACAGT	GTCCGC	L1	P18	C4	Nippobare	Root	TSB	1	Rice	WildType
L1P18C5	AGACTATACTGTCCGC	AACMGGATTAGATACCCKG	ACGTCATCCCCACCTTCC	AGACTATACT	GTCCGC	L1	P18	C5	Nippobare	Root	TSB	1	Rice	WildType
L1P18C6	AGCGTCGTCTGTCCGC	AACMGGATTAGATACCCKG	ACGTCATCCCCACCTTCC	AGCGTCGTCT	GTCCGC	L1	P18	C6	Nippobare	Root	TSB	1	Rice	WildType
L1P18C7	AGTACGCTATGTCCGC	AACMGGATTAGATACCCKG	ACGTCATCCCCACCTTCC	AGTACGCTAT	GTCCGC	L1	P18	C7	Nippobare	Root	TSB	1	Rice	WildType
L1P18C8	CACGCTACGAGTCCGC	AACMGGATTAGATACCCKG	ACGTCATCCCCACCTTCC	CACGCTACGA	GTCCGC	L1	P18	C8	Nippobare	Root	TSB	1	Rice	WildType
L1P18C9	CACGCTACGTGTCCGC	AACMGGATTAGATACCCKG	ACGTCATCCCCACCTTCC	CACGCTACGT	GTCCGC	L1	P18	C9	Nippobare	Root	TSB	1	Rice	WildType
L1P18C10	CAGTAGACGTGTCCGC	AACMGGATTAGATACCCKG	ACGTCATCCCCACCTTCC	CAGTAGACGT	GTCCGC	L1	P18	C10	Nippobare	Root	TSB	1	Rice	WildType
L1P18C11	CGACGTGACTGTCCGC	AACMGGATTAGATACCCKG	ACGTCATCCCCACCTTCC	CGACGTGACT	GTCCGC	L1	P18	C11	Nippobare	Root	TSB	1	Rice	WildType
L1P18C12	CAGTCTCTAGGTCCGC	AACMGGATTAGATACCCKG	ACGTCATCCCCACCTTCC	CAGTCTCTAG	GTCCGC	L1	P18	C12	Nippobare	Root	TSB	1	Rice	WildType
L1P18D1	TACACGTGATGTCCGC	AACMGGATTAGATACCCKG	ACGTCATCCCCACCTTCC	TACACGTGAT	GTCCGC	L1	P18	D1	Nippobare	Root	TSB	1	Rice	WildType
L1P18D2	TACAGATCGTGTCCGC	AACMGGATTAGATACCCKG	ACGTCATCCCCACCTTCC	TACAGATCGT	GTCCGC	L1	P18	D2	Nippobare	Root	TSB	1	Rice	WildType
L1P18D3	TACGCTGTCTGTCCGC	AACMGGATTAGATACCCKG	ACGTCATCCCCACCTTCC	TACGCTGTCT	GTCCGC	L1	P18	D3	Nippobare	Root	TSB	1	Rice	WildType
L1P18D4	TAGTGTAGATGTCCGC	AACMGGATTAGATACCCKG	ACGTCATCCCCACCTTCC	TAGTGTAGAT	GTCCGC	L1	P18	D4	Nippobare	Root	TSB	1	Rice	WildType
L1P18D5	TCGATCACGTGTCCGC	AACMGGATTAGATACCCKG	ACGTCATCCCCACCTTCC	TCGATCACGT	GTCCGC	L1	P18	D5	Nippobare	Root	TSB	1	Rice	WildType
L1P18D6	TCGCACTAGTGTCCGC	AACMGGATTAGATACCCKG	ACGTCATCCCCACCTTCC	TCGCACTAGT	GTCCGC	L1	P18	D6	Nippobare	Root	TSB	1	Rice	WildType
L1P18D7	TCTAGCGACTGTCCGC	AACMGGATTAGATACCCKG	ACGTCATCCCCACCTTCC	TCTAGCGACT	GTCCGC	L1	P18	D7	Nippobare	Root	TSB	1	Rice	WildType
L1P18D8	CACGTGTATAGTCCGC	AACMGGATTAGATACCCKG	ACGTCATCCCCACCTTCC	CACGTGTATA	GTCCGC	L1	P18	D8	Nippobare	Root	TSB	1	Rice	WildType
L1P18D9	TGACGTATGTGTCCGC	AACMGGATTAGATACCCKG	ACGTCATCCCCACCTTCC	TGACGTATGT	GTCCGC	L1	P18	D9	Nippobare	Root	TSB	1	Rice	WildType
L1P18D10	CACTACGATGGTCCGC	AACMGGATTAGATACCCKG	ACGTCATCCCCACCTTCC	CACTACGATG	GTCCGC	L1	P18	D10	Nippobare	Root	TSB	1	Rice	WildType
L1P18D11	ACAGTATATAGTCCGC	AACMGGATTAGATACCCKG	ACGTCATCCCCACCTTCC	ACAGTATATA	GTCCGC	L1	P18	D11	Nippobare	Root	TSB	1	Rice	WildType
L1P18D12	ACGCGATCGAGTCCGC	AACMGGATTAGATACCCKG	ACGTCATCCCCACCTTCC	ACGCGATCGA	GTCCGC	L1	P18	D12	Nippobare	Root	TSB	1	Rice	WildType
L1P18E1	ACTAGCAGTAGTCCGC	AACMGGATTAGATACCCKG	ACGTCATCCCCACCTTCC	ACTAGCAGTA	GTCCGC	L1	P18	E1	Nippobare	Root	TSB	1	Rice	WildType
L1P18E2	AGCTCACGTAGTCCGC	AACMGGATTAGATACCCKG	ACGTCATCCCCACCTTCC	AGCTCACGTA	GTCCGC	L1	P18	E2	Nippobare	Root	TSB	1	Rice	WildType
L1P18E3	AGTATACATAGTCCGC	AACMGGATTAGATACCCKG	ACGTCATCCCCACCTTCC	AGTATACATA	GTCCGC	L1	P18	E3	Nippobare	Root	TSB	1	Rice	WildType
L1P18E4	AGTCGAGAGAGTCCGC	AACMGGATTAGATACCCKG	ACGTCATCCCCACCTTCC	AGTCGAGAGA	GTCCGC	L1	P18	E4	Nippobare	Root	TSB	1	Rice	WildType
L1P18E5	AGTGCTACGAGTCCGC	AACMGGATTAGATACCCKG	ACGTCATCCCCACCTTCC	AGTGCTACGA	GTCCGC	L1	P18	E5	Nippobare	Root	TSB	1	Rice	WildType
L1P18E6	CGATCGTATAGTCCGC	AACMGGATTAGATACCCKG	ACGTCATCCCCACCTTCC	CGATCGTATA	GTCCGC	L1	P18	E6	Nippobare	Root	TSB	1	Rice	WildType
L1P18E7	CGCAGTACGAGTCCGC	AACMGGATTAGATACCCKG	ACGTCATCCCCACCTTCC	CGCAGTACGA	GTCCGC	L1	P18	E7	Nippobare	Root	TSB	1	Rice	WildType
L1P18E8	CGCGTATACAGTCCGC	AACMGGATTAGATACCCKG	ACGTCATCCCCACCTTCC	CGCGTATACA	GTCCGC	L1	P18	E8	Nippobare	Root	TSB	1	Rice	WildType
L1P18E9	CGTACAGTCAGTCCGC	AACMGGATTAGATACCCKG	ACGTCATCCCCACCTTCC	CGTACAGTCA	GTCCGC	L1	P18	E9	Nippobare	Root	TSB	1	Rice	WildType
L1P18E10	CGTACTCAGAGTCCGC	AACMGGATTAGATACCCKG	ACGTCATCCCCACCTTCC	CGTACTCAGA	GTCCGC	L1	P18	E10	Nippobare	Root	TSB	1	Rice	WildType
L1P18E11	CTACGCTCTAGTCCGC	AACMGGATTAGATACCCKG	ACGTCATCCCCACCTTCC	CTACGCTCTA	GTCCGC	L1	P18	E11	Nippobare	Root	TSB	1	Rice	WildType
L1P18E12	CTATAGCGTAGTCCGC	AACMGGATTAGATACCCKG	ACGTCATCCCCACCTTCC	CTATAGCGTA	GTCCGC	L1	P18	E12	Nippobare	Root	TSB	1	Rice	WildType
L1P18F1	TACGTCATCAGTCCGC	AACMGGATTAGATACCCKG	ACGTCATCCCCACCTTCC	TACGTCATCA	GTCCGC	L1	P18	F1	Nippobare	Root	TSB	1	Rice	WildType
L1P18F2	TAGTCGCATAGTCCGC	AACMGGATTAGATACCCKG	ACGTCATCCCCACCTTCC	TAGTCGCATA	GTCCGC	L1	P18	F2	Nippobare	Root	TSB	1	Rice	WildType
L1P18F3	TATATATACAGTCCGC	AACMGGATTAGATACCCKG	ACGTCATCCCCACCTTCC	TATATATACA	GTCCGC	L1	P18	F3	Nippobare	Root	TSB	1	Rice	WildType
L1P18F4	TATGCTAGTAGTCCGC	AACMGGATTAGATACCCKG	ACGTCATCCCCACCTTCC	TATGCTAGTA	GTCCGC	L1	P18	F4	Nippobare	Root	TSB	1	Rice	WildType
L1P18F5	TCACGCGAGAGTCCGC	AACMGGATTAGATACCCKG	ACGTCATCCCCACCTTCC	TCACGCGAGA	GTCCGC	L1	P18	F5	Nippobare	Root	TSB	1	Rice	WildType
L1P18F6	TCGATAGTGAGTCCGC	AACMGGATTAGATACCCKG	ACGTCATCCCCACCTTCC	TCGATAGTGA	GTCCGC	L1	P18	F6	Nippobare	Root	TSB	1	Rice	WildType
L1P18F7	TCGCTGCGTAGTCCGC	AACMGGATTAGATACCCKG	ACGTCATCCCCACCTTCC	TCGCTGCGTA	GTCCGC	L1	P18	F7	Nippobare	Root	TSB	1	Rice	WildType
L1P18F8	TCTGACGTCAGTCCGC	AACMGGATTAGATACCCKG	ACGTCATCCCCACCTTCC	TCTGACGTCA	GTCCGC	L1	P18	F8	Nippobare	Root	TSB	1	Rice	WildType
L1P18F9	TGAGTCAGTAGTCCGC	AACMGGATTAGATACCCKG	ACGTCATCCCCACCTTCC	TGAGTCAGTA	GTCCGC	L1	P18	F9	Nippobare	Root	TSB	1	Rice	WildType
L1P18F10	CACTATACTCGTCCGC	AACMGGATTAGATACCCKG	ACGTCATCCCCACCTTCC	CACTATACTC	GTCCGC	L1	P18	F10	Nippobare	Root	TSB	1	Rice	WildType
L1P18F11	TGTCACACGAGTCCGC	AACMGGATTAGATACCCKG	ACGTCATCCCCACCTTCC	TGTCACACGA	GTCCGC	L1	P18	F11	Nippobare	Root	TSB	1	Rice	WildType
L1P18F12	TGTCGTCGCAGTCCGC	AACMGGATTAGATACCCKG	ACGTCATCCCCACCTTCC	TGTCGTCGCA	GTCCGC	L1	P18	F12	Nippobare	Root	TSB	1	Rice	WildType
L1P18G1	ACACATACGCGTCCGC	AACMGGATTAGATACCCKG	ACGTCATCCCCACCTTCC	ACACATACGC	GTCCGC	L1	P18	G1	Nippobare	Root	TSB	1	Rice	WildType
L1P18G2	ACAGTCGTGCGTCCGC	AACMGGATTAGATACCCKG	ACGTCATCCCCACCTTCC	ACAGTCGTGC	GTCCGC	L1	P18	G2	Nippobare	Root	TSB	1	Rice	WildType
L1P18G3	ACATGACGACGTCCGC	AACMGGATTAGATACCCKG	ACGTCATCCCCACCTTCC	ACATGACGAC	GTCCGC	L1	P18	G3	Nippobare	Root	TSB	1	Rice	WildType
L1P18G4	ACGACAGCTCGTCCGC	AACMGGATTAGATACCCKG	ACGTCATCCCCACCTTCC	ACGACAGCTC	GTCCGC	L1	P18	G4	Nippobare	Root	TSB	1	Rice	WildType
L1P18G5	ACGTCTCATCGTCCGC	AACMGGATTAGATACCCKG	ACGTCATCCCCACCTTCC	ACGTCTCATC	GTCCGC	L1	P18	G5	Nippobare	Root	TSB	1	Rice	WildType
L1P18G6	ACTCATCTACGTCCGC	AACMGGATTAGATACCCKG	ACGTCATCCCCACCTTCC	ACTCATCTAC	GTCCGC	L1	P18	G6	Nippobare	Root	TSB	1	Rice	WildType
L1P18G7	ACTCGCGCACGTCCGC	AACMGGATTAGATACCCKG	ACGTCATCCCCACCTTCC	ACTCGCGCAC	GTCCGC	L1	P18	G7	Nippobare	Root	TSB	1	Rice	WildType
L1P18G8	AGAGCGTCACGTCCGC	AACMGGATTAGATACCCKG	ACGTCATCCCCACCTTCC	AGAGCGTCAC	GTCCGC	L1	P18	G8	Nippobare	Root	TSB	1	Rice	WildType
L1P18G9	AGCGACTAGCGTCCGC	AACMGGATTAGATACCCKG	ACGTCATCCCCACCTTCC	AGCGACTAGC	GTCCGC	L1	P18	G9	Nippobare	Root	TSB	1	Rice	WildType
L1P18G10	CAGCGTACTGGTCCGC	AACMGGATTAGATACCCKG	ACGTCATCCCCACCTTCC	CAGCGTACTG	GTCCGC	L1	P18	G10	Nippobare	Root	TSB	1	Rice	WildType
L1P18G11	AGTGACACACGTCCGC	AACMGGATTAGATACCCKG	ACGTCATCCCCACCTTCC	AGTGACACAC	GTCCGC	L1	P18	G11	Nippobare	Root	TSB	1	Rice	WildType
L1P18G12	AGTGTATGTCGTCCGC	AACMGGATTAGATACCCKG	ACGTCATCCCCACCTTCC	AGTGTATGTC	GTCCGC	L1	P18	G12	Nippobare	Root	TSB	1	Rice	WildType
L1P18H1	ATAGATAGACGTCCGC	AACMGGATTAGATACCCKG	ACGTCATCCCCACCTTCC	ATAGATAGAC	GTCCGC	L1	P18	H1	Nippobare	Root	TSB	1	Rice	WildType
L1P18H2	ATATAGTCGCGTCCGC	AACMGGATTAGATACCCKG	ACGTCATCCCCACCTTCC	ATATAGTCGC	GTCCGC	L1	P18	H2	Nippobare	Root	TSB	1	Rice	WildType
L1P18H3	ATCTACTGACGTCCGC	AACMGGATTAGATACCCKG	ACGTCATCCCCACCTTCC	ATCTACTGAC	GTCCGC	L1	P18	H3	Nippobare	Root	TSB	1	Rice	WildType
L1P18H4	CACGTAGATCGTCCGC	AACMGGATTAGATACCCKG	ACGTCATCCCCACCTTCC	CACGTAGATC	GTCCGC	L1	P18	H4	Nippobare	Root	TSB	1	Rice	WildType
L1P18H5	CACGTCTCGCGTCCGC	AACMGGATTAGATACCCKG	ACGTCATCCCCACCTTCC	CACGTCTCGC	GTCCGC	L1	P18	H5	Nippobare	Root	TSB	1	Rice	WildType
L1P18H6	CATACTCTACGTCCGC	AACMGGATTAGATACCCKG	ACGTCATCCCCACCTTCC	CATACTCTAC	GTCCGC	L1	P18	H6	Nippobare	Root	TSB	1	Rice	WildType
L1P18H7	CGACACTATCGTCCGC	AACMGGATTAGATACCCKG	ACGTCATCCCCACCTTCC	CGACACTATC	GTCCGC	L1	P18	H7	Nippobare	Root	TSB	1	Rice	WildType
L1P18H8	CGAGACGCGCGTCCGC	AACMGGATTAGATACCCKG	ACGTCATCCCCACCTTCC	CGAGACGCGC	GTCCGC	L1	P18	H8	Nippobare	Root	TSB	1	Rice	WildType
L1P18H9	CGTATGCGACGTCCGC	AACMGGATTAGATACCCKG	ACGTCATCCCCACCTTCC	CGTATGCGAC	GTCCGC	L1	P18	H9	Nippobare	Root	TSB	1	Rice	WildType
L1P18H10	CGTCGATCTCGTCCGC	AACMGGATTAGATACCCKG	ACGTCATCCCCACCTTCC	CGTCGATCTC	GTCCGC	L1	P18	H10	Nippobare	Root	TSB	1	Rice	WildType
L1P18H11	CTACGACTGCGTCCGC	AACMGGATTAGATACCCKG	ACGTCATCCCCACCTTCC	CTACGACTGC	GTCCGC	L1	P18	H11	Nippobare	Root	TSB	1	Rice	WildType
L1P18H12	CTAGTCACTCGTCCGC	AACMGGATTAGATACCCKG	ACGTCATCCCCACCTTCC	CTAGTCACTC	GTCCGC	L1	P18	H12	Nippobare	Root	TSB	1	Rice	WildType
L1P19A1	ACGCTCGACAGTGAAA	AACMGGATTAGATACCCKG	ACGTCATCCCCACCTTCC	ACGCTCGACA	GTGAAA	L1	P19	A1	Nippobare	Root	TSB	1	Rice	WildType
L1P19A2	AGACGCACTCGTGAAA	AACMGGATTAGATACCCKG	ACGTCATCCCCACCTTCC	AGACGCACTC	GTGAAA	L1	P19	A2	Nippobare	Root	TSB	1	Rice	WildType
L1P19A3	AGCACTGTAGGTGAAA	AACMGGATTAGATACCCKG	ACGTCATCCCCACCTTCC	AGCACTGTAG	GTGAAA	L1	P19	A3	Nippobare	Root	TSB	1	Rice	WildType
L1P19A4	ATCAGACACGGTGAAA	AACMGGATTAGATACCCKG	ACGTCATCCCCACCTTCC	ATCAGACACG	GTGAAA	L1	P19	A4	Nippobare	Root	TSB	1	Rice	WildType
L1P19A5	ATATCGCGAGGTGAAA	AACMGGATTAGATACCCKG	ACGTCATCCCCACCTTCC	ATATCGCGAG	GTGAAA	L1	P19	A5	Nippobare	Root	TSB	1	Rice	WildType
L1P19A6	CACGAGACAGGTGAAA	AACMGGATTAGATACCCKG	ACGTCATCCCCACCTTCC	CACGAGACAG	GTGAAA	L1	P19	A6	Nippobare	Root	TSB	1	Rice	WildType
L1P19A7	CTCGCGTGTCGTGAAA	AACMGGATTAGATACCCKG	ACGTCATCCCCACCTTCC	CTCGCGTGTC	GTGAAA	L1	P19	A7	Nippobare	Root	TSB	1	Rice	WildType
L1P19A8	TAGTATCAGCGTGAAA	AACMGGATTAGATACCCKG	ACGTCATCCCCACCTTCC	TAGTATCAGC	GTGAAA	L1	P19	A8	Nippobare	Root	TSB	1	Rice	WildType
L1P19A9	TCTCTATGCGGTGAAA	AACMGGATTAGATACCCKG	ACGTCATCCCCACCTTCC	TCTCTATGCG	GTGAAA	L1	P19	A9	Nippobare	Root	TSB	1	Rice	WildType
L1P19A10	TGATACGTCTGTGAAA	AACMGGATTAGATACCCKG	ACGTCATCCCCACCTTCC	TGATACGTCT	GTGAAA	L1	P19	A10	Nippobare	Root	TSB	1	Rice	WildType
L1P19A11	TACTGAGCTAGTGAAA	AACMGGATTAGATACCCKG	ACGTCATCCCCACCTTCC	TACTGAGCTA	GTGAAA	L1	P19	A11	Nippobare	Root	TSB	1	Rice	WildType
L1P19A12	CATAGTAGTGGTGAAA	AACMGGATTAGATACCCKG	ACGTCATCCCCACCTTCC	CATAGTAGTG	GTGAAA	L1	P19	A12	Nippobare	Root	TSB	1	Rice	WildType
L1P19B1	CGAGAGATACGTGAAA	AACMGGATTAGATACCCKG	ACGTCATCCCCACCTTCC	CGAGAGATAC	GTGAAA	L1	P19	B1	Nippobare	Root	TSB	1	Rice	WildType
L1P19B2	ATACGACGTAGTGAAA	AACMGGATTAGATACCCKG	ACGTCATCCCCACCTTCC	ATACGACGTA	GTGAAA	L1	P19	B2	Nippobare	Root	TSB	1	Rice	WildType
L1P19B3	TCACGTACTAGTGAAA	AACMGGATTAGATACCCKG	ACGTCATCCCCACCTTCC	TCACGTACTA	GTGAAA	L1	P19	B3	Nippobare	Root	TSB	1	Rice	WildType
L1P19B4	CGTCTAGTACGTGAAA	AACMGGATTAGATACCCKG	ACGTCATCCCCACCTTCC	CGTCTAGTAC	GTGAAA	L1	P19	B4	Nippobare	Root	TSB	1	Rice	WildType
L1P19B5	TCTACGTAGCGTGAAA	AACMGGATTAGATACCCKG	ACGTCATCCCCACCTTCC	TCTACGTAGC	GTGAAA	L1	P19	B5	Nippobare	Root	TSB	1	Rice	WildType
L1P19B6	CACGCGAGTCGTGAAA	AACMGGATTAGATACCCKG	ACGTCATCCCCACCTTCC	CACGCGAGTC	GTGAAA	L1	P19	B6	Nippobare	Root	TSB	1	Rice	WildType
L1P19B7	ACGACTACAGGTGAAA	AACMGGATTAGATACCCKG	ACGTCATCCCCACCTTCC	ACGACTACAG	GTGAAA	L1	P19	B7	Nippobare	Root	TSB	1	Rice	WildType
L1P19B8	CGTAGACTAGGTGAAA	AACMGGATTAGATACCCKG	ACGTCATCCCCACCTTCC	CGTAGACTAG	GTGAAA	L1	P19	B8	Nippobare	Root	TSB	1	Rice	WildType
L1P19B9	TACGAGTATGGTGAAA	AACMGGATTAGATACCCKG	ACGTCATCCCCACCTTCC	TACGAGTATG	GTGAAA	L1	P19	B9	Nippobare	Root	TSB	1	Rice	WildType
L1P19B10	TACTCTCGTGGTGAAA	AACMGGATTAGATACCCKG	ACGTCATCCCCACCTTCC	TACTCTCGTG	GTGAAA	L1	P19	B10	Nippobare	Root	TSB	1	Rice	WildType
L1P19B11	TAGAGACGAGGTGAAA	AACMGGATTAGATACCCKG	ACGTCATCCCCACCTTCC	TAGAGACGAG	GTGAAA	L1	P19	B11	Nippobare	Root	TSB	1	Rice	WildType
L1P19B12	TCGTCGCTCGGTGAAA	AACMGGATTAGATACCCKG	ACGTCATCCCCACCTTCC	TCGTCGCTCG	GTGAAA	L1	P19	B12	Nippobare	Root	TSB	1	Rice	WildType
L1P19C1	ACATACGCGTGTGAAA	AACMGGATTAGATACCCKG	ACGTCATCCCCACCTTCC	ACATACGCGT	GTGAAA	L1	P19	C1	Nippobare	Root	TSB	1	Rice	WildType
L1P19C2	ACGCGAGTATGTGAAA	AACMGGATTAGATACCCKG	ACGTCATCCCCACCTTCC	ACGCGAGTAT	GTGAAA	L1	P19	C2	Nippobare	Root	TSB	1	Rice	WildType
L1P19C3	ACTACTATGTGTGAAA	AACMGGATTAGATACCCKG	ACGTCATCCCCACCTTCC	ACTACTATGT	GTGAAA	L1	P19	C3	Nippobare	Root	TSB	1	Rice	WildType
L1P19C4	ACTGTACAGTGTGAAA	AACMGGATTAGATACCCKG	ACGTCATCCCCACCTTCC	ACTGTACAGT	GTGAAA	L1	P19	C4	Nippobare	Root	TSB	1	Rice	WildType
L1P19C5	AGACTATACTGTGAAA	AACMGGATTAGATACCCKG	ACGTCATCCCCACCTTCC	AGACTATACT	GTGAAA	L1	P19	C5	Nippobare	Root	TSB	1	Rice	WildType
L1P19C6	AGCGTCGTCTGTGAAA	AACMGGATTAGATACCCKG	ACGTCATCCCCACCTTCC	AGCGTCGTCT	GTGAAA	L1	P19	C6	Nippobare	Root	TSB	1	Rice	WildType
L1P19C7	AGTACGCTATGTGAAA	AACMGGATTAGATACCCKG	ACGTCATCCCCACCTTCC	AGTACGCTAT	GTGAAA	L1	P19	C7	Nippobare	Root	TSB	1	Rice	WildType
L1P19C8	CACGCTACGAGTGAAA	AACMGGATTAGATACCCKG	ACGTCATCCCCACCTTCC	CACGCTACGA	GTGAAA	L1	P19	C8	Nippobare	Root	TSB	1	Rice	WildType
L1P19C9	CACGCTACGTGTGAAA	AACMGGATTAGATACCCKG	ACGTCATCCCCACCTTCC	CACGCTACGT	GTGAAA	L1	P19	C9	Nippobare	Root	TSB	1	Rice	WildType
L1P19C10	CAGTAGACGTGTGAAA	AACMGGATTAGATACCCKG	ACGTCATCCCCACCTTCC	CAGTAGACGT	GTGAAA	L1	P19	C10	Nippobare	Root	TSB	1	Rice	WildType
L1P19C11	CGACGTGACTGTGAAA	AACMGGATTAGATACCCKG	ACGTCATCCCCACCTTCC	CGACGTGACT	GTGAAA	L1	P19	C11	Nippobare	Root	TSB	1	Rice	WildType
L1P19C12	CAGTCTCTAGGTGAAA	AACMGGATTAGATACCCKG	ACGTCATCCCCACCTTCC	CAGTCTCTAG	GTGAAA	L1	P19	C12	Nippobare	Root	TSB	1	Rice	WildType
L1P19D1	TACACGTGATGTGAAA	AACMGGATTAGATACCCKG	ACGTCATCCCCACCTTCC	TACACGTGAT	GTGAAA	L1	P19	D1	Nippobare	Root	TSB	1	Rice	WildType
L1P19D2	TACAGATCGTGTGAAA	AACMGGATTAGATACCCKG	ACGTCATCCCCACCTTCC	TACAGATCGT	GTGAAA	L1	P19	D2	Nippobare	Root	TSB	1	Rice	WildType
L1P19D3	TACGCTGTCTGTGAAA	AACMGGATTAGATACCCKG	ACGTCATCCCCACCTTCC	TACGCTGTCT	GTGAAA	L1	P19	D3	Nippobare	Root	TSB	1	Rice	WildType
L1P19D4	TAGTGTAGATGTGAAA	AACMGGATTAGATACCCKG	ACGTCATCCCCACCTTCC	TAGTGTAGAT	GTGAAA	L1	P19	D4	Nippobare	Root	TSB	1	Rice	WildType
L1P19D5	TCGATCACGTGTGAAA	AACMGGATTAGATACCCKG	ACGTCATCCCCACCTTCC	TCGATCACGT	GTGAAA	L1	P19	D5	Nippobare	Root	TSB	1	Rice	WildType
L1P19D6	TCGCACTAGTGTGAAA	AACMGGATTAGATACCCKG	ACGTCATCCCCACCTTCC	TCGCACTAGT	GTGAAA	L1	P19	D6	Nippobare	Root	TSB	1	Rice	WildType
L1P19D7	TCTAGCGACTGTGAAA	AACMGGATTAGATACCCKG	ACGTCATCCCCACCTTCC	TCTAGCGACT	GTGAAA	L1	P19	D7	Nippobare	Root	TSB	1	Rice	WildType
L1P19D8	CACGTGTATAGTGAAA	AACMGGATTAGATACCCKG	ACGTCATCCCCACCTTCC	CACGTGTATA	GTGAAA	L1	P19	D8	Nippobare	Root	TSB	1	Rice	WildType
L1P19D9	TGACGTATGTGTGAAA	AACMGGATTAGATACCCKG	ACGTCATCCCCACCTTCC	TGACGTATGT	GTGAAA	L1	P19	D9	Nippobare	Root	TSB	1	Rice	WildType
L1P19D10	CACTACGATGGTGAAA	AACMGGATTAGATACCCKG	ACGTCATCCCCACCTTCC	CACTACGATG	GTGAAA	L1	P19	D10	Nippobare	Root	TSB	1	Rice	WildType
L1P19D11	ACAGTATATAGTGAAA	AACMGGATTAGATACCCKG	ACGTCATCCCCACCTTCC	ACAGTATATA	GTGAAA	L1	P19	D11	Nippobare	Root	TSB	1	Rice	WildType
L1P19D12	ACGCGATCGAGTGAAA	AACMGGATTAGATACCCKG	ACGTCATCCCCACCTTCC	ACGCGATCGA	GTGAAA	L1	P19	D12	Nippobare	Root	TSB	1	Rice	WildType
L1P19E1	ACTAGCAGTAGTGAAA	AACMGGATTAGATACCCKG	ACGTCATCCCCACCTTCC	ACTAGCAGTA	GTGAAA	L1	P19	E1	Nippobare	Root	TSB	1	Rice	WildType
L1P19E2	AGCTCACGTAGTGAAA	AACMGGATTAGATACCCKG	ACGTCATCCCCACCTTCC	AGCTCACGTA	GTGAAA	L1	P19	E2	Nippobare	Root	TSB	1	Rice	WildType
L1P19E3	AGTATACATAGTGAAA	AACMGGATTAGATACCCKG	ACGTCATCCCCACCTTCC	AGTATACATA	GTGAAA	L1	P19	E3	Nippobare	Root	TSB	1	Rice	WildType
L1P19E4	AGTCGAGAGAGTGAAA	AACMGGATTAGATACCCKG	ACGTCATCCCCACCTTCC	AGTCGAGAGA	GTGAAA	L1	P19	E4	Nippobare	Root	TSB	1	Rice	WildType
L1P19E5	AGTGCTACGAGTGAAA	AACMGGATTAGATACCCKG	ACGTCATCCCCACCTTCC	AGTGCTACGA	GTGAAA	L1	P19	E5	Nippobare	Root	TSB	1	Rice	WildType
L1P19E6	CGATCGTATAGTGAAA	AACMGGATTAGATACCCKG	ACGTCATCCCCACCTTCC	CGATCGTATA	GTGAAA	L1	P19	E6	Nippobare	Root	TSB	1	Rice	WildType
L1P19E7	CGCAGTACGAGTGAAA	AACMGGATTAGATACCCKG	ACGTCATCCCCACCTTCC	CGCAGTACGA	GTGAAA	L1	P19	E7	Nippobare	Root	TSB	1	Rice	WildType
L1P19E8	CGCGTATACAGTGAAA	AACMGGATTAGATACCCKG	ACGTCATCCCCACCTTCC	CGCGTATACA	GTGAAA	L1	P19	E8	Nippobare	Root	TSB	1	Rice	WildType
L1P19E9	CGTACAGTCAGTGAAA	AACMGGATTAGATACCCKG	ACGTCATCCCCACCTTCC	CGTACAGTCA	GTGAAA	L1	P19	E9	Nippobare	Root	TSB	1	Rice	WildType
L1P19E10	CGTACTCAGAGTGAAA	AACMGGATTAGATACCCKG	ACGTCATCCCCACCTTCC	CGTACTCAGA	GTGAAA	L1	P19	E10	Nippobare	Root	TSB	1	Rice	WildType
L1P19E11	CTACGCTCTAGTGAAA	AACMGGATTAGATACCCKG	ACGTCATCCCCACCTTCC	CTACGCTCTA	GTGAAA	L1	P19	E11	Nippobare	Root	TSB	1	Rice	WildType
L1P19E12	CTATAGCGTAGTGAAA	AACMGGATTAGATACCCKG	ACGTCATCCCCACCTTCC	CTATAGCGTA	GTGAAA	L1	P19	E12	Nippobare	Root	TSB	1	Rice	WildType
L1P19F1	TACGTCATCAGTGAAA	AACMGGATTAGATACCCKG	ACGTCATCCCCACCTTCC	TACGTCATCA	GTGAAA	L1	P19	F1	Nippobare	Root	TSB	1	Rice	WildType
L1P19F2	TAGTCGCATAGTGAAA	AACMGGATTAGATACCCKG	ACGTCATCCCCACCTTCC	TAGTCGCATA	GTGAAA	L1	P19	F2	Nippobare	Root	TSB	1	Rice	WildType
L1P19F3	TATATATACAGTGAAA	AACMGGATTAGATACCCKG	ACGTCATCCCCACCTTCC	TATATATACA	GTGAAA	L1	P19	F3	Nippobare	Root	TSB	1	Rice	WildType
L1P19F4	TATGCTAGTAGTGAAA	AACMGGATTAGATACCCKG	ACGTCATCCCCACCTTCC	TATGCTAGTA	GTGAAA	L1	P19	F4	Nippobare	Root	TSB	1	Rice	WildType
L1P19F5	TCACGCGAGAGTGAAA	AACMGGATTAGATACCCKG	ACGTCATCCCCACCTTCC	TCACGCGAGA	GTGAAA	L1	P19	F5	Nippobare	Root	TSB	1	Rice	WildType
L1P19F6	TCGATAGTGAGTGAAA	AACMGGATTAGATACCCKG	ACGTCATCCCCACCTTCC	TCGATAGTGA	GTGAAA	L1	P19	F6	Nippobare	Root	TSB	1	Rice	WildType
L1P19F7	TCGCTGCGTAGTGAAA	AACMGGATTAGATACCCKG	ACGTCATCCCCACCTTCC	TCGCTGCGTA	GTGAAA	L1	P19	F7	Nippobare	Root	TSB	1	Rice	WildType
L1P19F8	TCTGACGTCAGTGAAA	AACMGGATTAGATACCCKG	ACGTCATCCCCACCTTCC	TCTGACGTCA	GTGAAA	L1	P19	F8	Nippobare	Root	TSB	1	Rice	WildType
L1P19F9	TGAGTCAGTAGTGAAA	AACMGGATTAGATACCCKG	ACGTCATCCCCACCTTCC	TGAGTCAGTA	GTGAAA	L1	P19	F9	Nippobare	Root	TSB	1	Rice	WildType
L1P19F10	CACTATACTCGTGAAA	AACMGGATTAGATACCCKG	ACGTCATCCCCACCTTCC	CACTATACTC	GTGAAA	L1	P19	F10	Nippobare	Root	TSB	1	Rice	WildType
L1P19F11	TGTCACACGAGTGAAA	AACMGGATTAGATACCCKG	ACGTCATCCCCACCTTCC	TGTCACACGA	GTGAAA	L1	P19	F11	Nippobare	Root	TSB	1	Rice	WildType
L1P19F12	TGTCGTCGCAGTGAAA	AACMGGATTAGATACCCKG	ACGTCATCCCCACCTTCC	TGTCGTCGCA	GTGAAA	L1	P19	F12	Nippobare	Root	TSB	1	Rice	WildType
L1P19G1	ACACATACGCGTGAAA	AACMGGATTAGATACCCKG	ACGTCATCCCCACCTTCC	ACACATACGC	GTGAAA	L1	P19	G1	Nippobare	Root	TSB	1	Rice	WildType
L1P19G2	ACAGTCGTGCGTGAAA	AACMGGATTAGATACCCKG	ACGTCATCCCCACCTTCC	ACAGTCGTGC	GTGAAA	L1	P19	G2	Nippobare	Root	TSB	1	Rice	WildType
L1P19G3	ACATGACGACGTGAAA	AACMGGATTAGATACCCKG	ACGTCATCCCCACCTTCC	ACATGACGAC	GTGAAA	L1	P19	G3	Nippobare	Root	TSB	1	Rice	WildType
L1P19G4	ACGACAGCTCGTGAAA	AACMGGATTAGATACCCKG	ACGTCATCCCCACCTTCC	ACGACAGCTC	GTGAAA	L1	P19	G4	Nippobare	Root	TSB	1	Rice	WildType
L1P19G5	ACGTCTCATCGTGAAA	AACMGGATTAGATACCCKG	ACGTCATCCCCACCTTCC	ACGTCTCATC	GTGAAA	L1	P19	G5	Nippobare	Root	TSB	1	Rice	WildType
L1P19G6	ACTCATCTACGTGAAA	AACMGGATTAGATACCCKG	ACGTCATCCCCACCTTCC	ACTCATCTAC	GTGAAA	L1	P19	G6	Nippobare	Root	TSB	1	Rice	WildType
L1P19G7	ACTCGCGCACGTGAAA	AACMGGATTAGATACCCKG	ACGTCATCCCCACCTTCC	ACTCGCGCAC	GTGAAA	L1	P19	G7	Nippobare	Root	TSB	1	Rice	WildType
L1P19G8	AGAGCGTCACGTGAAA	AACMGGATTAGATACCCKG	ACGTCATCCCCACCTTCC	AGAGCGTCAC	GTGAAA	L1	P19	G8	Nippobare	Root	TSB	1	Rice	WildType
L1P19G9	AGCGACTAGCGTGAAA	AACMGGATTAGATACCCKG	ACGTCATCCCCACCTTCC	AGCGACTAGC	GTGAAA	L1	P19	G9	Nippobare	Root	TSB	1	Rice	WildType
L1P19G10	CAGCGTACTGGTGAAA	AACMGGATTAGATACCCKG	ACGTCATCCCCACCTTCC	CAGCGTACTG	GTGAAA	L1	P19	G10	Nippobare	Root	TSB	1	Rice	WildType
L1P19G11	AGTGACACACGTGAAA	AACMGGATTAGATACCCKG	ACGTCATCCCCACCTTCC	AGTGACACAC	GTGAAA	L1	P19	G11	Nippobare	Root	TSB	1	Rice	WildType
L1P19G12	AGTGTATGTCGTGAAA	AACMGGATTAGATACCCKG	ACGTCATCCCCACCTTCC	AGTGTATGTC	GTGAAA	L1	P19	G12	Nippobare	Root	TSB	1	Rice	WildType
L1P19H1	ATAGATAGACGTGAAA	AACMGGATTAGATACCCKG	ACGTCATCCCCACCTTCC	ATAGATAGAC	GTGAAA	L1	P19	H1	Nippobare	Root	TSB	1	Rice	WildType
L1P19H2	ATATAGTCGCGTGAAA	AACMGGATTAGATACCCKG	ACGTCATCCCCACCTTCC	ATATAGTCGC	GTGAAA	L1	P19	H2	Nippobare	Root	TSB	1	Rice	WildType
L1P19H3	ATCTACTGACGTGAAA	AACMGGATTAGATACCCKG	ACGTCATCCCCACCTTCC	ATCTACTGAC	GTGAAA	L1	P19	H3	Nippobare	Root	TSB	1	Rice	WildType
L1P19H4	CACGTAGATCGTGAAA	AACMGGATTAGATACCCKG	ACGTCATCCCCACCTTCC	CACGTAGATC	GTGAAA	L1	P19	H4	Nippobare	Root	TSB	1	Rice	WildType
L1P19H5	CACGTCTCGCGTGAAA	AACMGGATTAGATACCCKG	ACGTCATCCCCACCTTCC	CACGTCTCGC	GTGAAA	L1	P19	H5	Nippobare	Root	TSB	1	Rice	WildType
L1P19H6	CATACTCTACGTGAAA	AACMGGATTAGATACCCKG	ACGTCATCCCCACCTTCC	CATACTCTAC	GTGAAA	L1	P19	H6	Nippobare	Root	TSB	1	Rice	WildType
L1P19H7	CGACACTATCGTGAAA	AACMGGATTAGATACCCKG	ACGTCATCCCCACCTTCC	CGACACTATC	GTGAAA	L1	P19	H7	Nippobare	Root	TSB	1	Rice	WildType
L1P19H8	CGAGACGCGCGTGAAA	AACMGGATTAGATACCCKG	ACGTCATCCCCACCTTCC	CGAGACGCGC	GTGAAA	L1	P19	H8	Nippobare	Root	TSB	1	Rice	WildType
L1P19H9	CGTATGCGACGTGAAA	AACMGGATTAGATACCCKG	ACGTCATCCCCACCTTCC	CGTATGCGAC	GTGAAA	L1	P19	H9	Nippobare	Root	TSB	1	Rice	WildType
L1P19H10	CGTCGATCTCGTGAAA	AACMGGATTAGATACCCKG	ACGTCATCCCCACCTTCC	CGTCGATCTC	GTGAAA	L1	P19	H10	Nippobare	Root	TSB	1	Rice	WildType
L1P19H11	CTACGACTGCGTGAAA	AACMGGATTAGATACCCKG	ACGTCATCCCCACCTTCC	CTACGACTGC	GTGAAA	L1	P19	H11	Nippobare	Root	TSB	1	Rice	WildType
L1P19H12	CTAGTCACTCGTGAAA	AACMGGATTAGATACCCKG	ACGTCATCCCCACCTTCC	CTAGTCACTC	GTGAAA	L1	P19	H12	Nippobare	Root	TSB	1	Rice	WildType
L1P20A1	ACGCTCGACAGTGGCC	AACMGGATTAGATACCCKG	ACGTCATCCCCACCTTCC	ACGCTCGACA	GTGGCC	L1	P20	A1	Nippobare	Root	TSB	1	Rice	WildType
L1P20A2	AGACGCACTCGTGGCC	AACMGGATTAGATACCCKG	ACGTCATCCCCACCTTCC	AGACGCACTC	GTGGCC	L1	P20	A2	Nippobare	Root	TSB	1	Rice	WildType
L1P20A3	AGCACTGTAGGTGGCC	AACMGGATTAGATACCCKG	ACGTCATCCCCACCTTCC	AGCACTGTAG	GTGGCC	L1	P20	A3	Nippobare	Root	TSB	1	Rice	WildType
L1P20A4	ATCAGACACGGTGGCC	AACMGGATTAGATACCCKG	ACGTCATCCCCACCTTCC	ATCAGACACG	GTGGCC	L1	P20	A4	Nippobare	Root	TSB	1	Rice	WildType
L1P20A5	ATATCGCGAGGTGGCC	AACMGGATTAGATACCCKG	ACGTCATCCCCACCTTCC	ATATCGCGAG	GTGGCC	L1	P20	A5	Nippobare	Root	TSB	1	Rice	WildType
L1P20A6	CACGAGACAGGTGGCC	AACMGGATTAGATACCCKG	ACGTCATCCCCACCTTCC	CACGAGACAG	GTGGCC	L1	P20	A6	Nippobare	Root	TSB	1	Rice	WildType
L1P20A7	CTCGCGTGTCGTGGCC	AACMGGATTAGATACCCKG	ACGTCATCCCCACCTTCC	CTCGCGTGTC	GTGGCC	L1	P20	A7	Nippobare	Root	TSB	1	Rice	WildType
L1P20A8	TAGTATCAGCGTGGCC	AACMGGATTAGATACCCKG	ACGTCATCCCCACCTTCC	TAGTATCAGC	GTGGCC	L1	P20	A8	Nippobare	Root	TSB	1	Rice	WildType
L1P20A9	TCTCTATGCGGTGGCC	AACMGGATTAGATACCCKG	ACGTCATCCCCACCTTCC	TCTCTATGCG	GTGGCC	L1	P20	A9	Nippobare	Root	TSB	1	Rice	WildType
L1P20A10	TGATACGTCTGTGGCC	AACMGGATTAGATACCCKG	ACGTCATCCCCACCTTCC	TGATACGTCT	GTGGCC	L1	P20	A10	Nippobare	Root	TSB	1	Rice	WildType
L1P20A11	TACTGAGCTAGTGGCC	AACMGGATTAGATACCCKG	ACGTCATCCCCACCTTCC	TACTGAGCTA	GTGGCC	L1	P20	A11	Nippobare	Root	TSB	1	Rice	WildType
L1P20A12	CATAGTAGTGGTGGCC	AACMGGATTAGATACCCKG	ACGTCATCCCCACCTTCC	CATAGTAGTG	GTGGCC	L1	P20	A12	Nippobare	Root	TSB	1	Rice	WildType
L1P20B1	CGAGAGATACGTGGCC	AACMGGATTAGATACCCKG	ACGTCATCCCCACCTTCC	CGAGAGATAC	GTGGCC	L1	P20	B1	Nippobare	Root	TSB	1	Rice	WildType
L1P20B2	ATACGACGTAGTGGCC	AACMGGATTAGATACCCKG	ACGTCATCCCCACCTTCC	ATACGACGTA	GTGGCC	L1	P20	B2	Nippobare	Root	TSB	1	Rice	WildType
L1P20B3	TCACGTACTAGTGGCC	AACMGGATTAGATACCCKG	ACGTCATCCCCACCTTCC	TCACGTACTA	GTGGCC	L1	P20	B3	Nippobare	Root	TSB	1	Rice	WildType
L1P20B4	CGTCTAGTACGTGGCC	AACMGGATTAGATACCCKG	ACGTCATCCCCACCTTCC	CGTCTAGTAC	GTGGCC	L1	P20	B4	Nippobare	Root	TSB	1	Rice	WildType
L1P20B5	TCTACGTAGCGTGGCC	AACMGGATTAGATACCCKG	ACGTCATCCCCACCTTCC	TCTACGTAGC	GTGGCC	L1	P20	B5	Nippobare	Root	TSB	1	Rice	WildType
L1P20B6	CACGCGAGTCGTGGCC	AACMGGATTAGATACCCKG	ACGTCATCCCCACCTTCC	CACGCGAGTC	GTGGCC	L1	P20	B6	Nippobare	Root	TSB	1	Rice	WildType
L1P20B7	ACGACTACAGGTGGCC	AACMGGATTAGATACCCKG	ACGTCATCCCCACCTTCC	ACGACTACAG	GTGGCC	L1	P20	B7	Nippobare	Root	TSB	1	Rice	WildType
L1P20B8	CGTAGACTAGGTGGCC	AACMGGATTAGATACCCKG	ACGTCATCCCCACCTTCC	CGTAGACTAG	GTGGCC	L1	P20	B8	Nippobare	Root	TSB	1	Rice	WildType
L1P20B9	TACGAGTATGGTGGCC	AACMGGATTAGATACCCKG	ACGTCATCCCCACCTTCC	TACGAGTATG	GTGGCC	L1	P20	B9	Nippobare	Root	TSB	1	Rice	WildType
L1P20B10	TACTCTCGTGGTGGCC	AACMGGATTAGATACCCKG	ACGTCATCCCCACCTTCC	TACTCTCGTG	GTGGCC	L1	P20	B10	Nippobare	Root	TSB	1	Rice	WildType
L1P20B11	TAGAGACGAGGTGGCC	AACMGGATTAGATACCCKG	ACGTCATCCCCACCTTCC	TAGAGACGAG	GTGGCC	L1	P20	B11	Nippobare	Root	TSB	1	Rice	WildType
L1P20B12	TCGTCGCTCGGTGGCC	AACMGGATTAGATACCCKG	ACGTCATCCCCACCTTCC	TCGTCGCTCG	GTGGCC	L1	P20	B12	Nippobare	Root	TSB	1	Rice	WildType
L1P20C1	ACATACGCGTGTGGCC	AACMGGATTAGATACCCKG	ACGTCATCCCCACCTTCC	ACATACGCGT	GTGGCC	L1	P20	C1	Nippobare	Root	TSB	1	Rice	WildType
L1P20C2	ACGCGAGTATGTGGCC	AACMGGATTAGATACCCKG	ACGTCATCCCCACCTTCC	ACGCGAGTAT	GTGGCC	L1	P20	C2	Nippobare	Root	TSB	1	Rice	WildType
L1P20C3	ACTACTATGTGTGGCC	AACMGGATTAGATACCCKG	ACGTCATCCCCACCTTCC	ACTACTATGT	GTGGCC	L1	P20	C3	Nippobare	Root	TSB	1	Rice	WildType
L1P20C4	ACTGTACAGTGTGGCC	AACMGGATTAGATACCCKG	ACGTCATCCCCACCTTCC	ACTGTACAGT	GTGGCC	L1	P20	C4	Nippobare	Root	TSB	1	Rice	WildType
L1P20C5	AGACTATACTGTGGCC	AACMGGATTAGATACCCKG	ACGTCATCCCCACCTTCC	AGACTATACT	GTGGCC	L1	P20	C5	Nippobare	Root	TSB	1	Rice	WildType
L1P20C6	AGCGTCGTCTGTGGCC	AACMGGATTAGATACCCKG	ACGTCATCCCCACCTTCC	AGCGTCGTCT	GTGGCC	L1	P20	C6	Nippobare	Root	TSB	1	Rice	WildType
L1P20C7	AGTACGCTATGTGGCC	AACMGGATTAGATACCCKG	ACGTCATCCCCACCTTCC	AGTACGCTAT	GTGGCC	L1	P20	C7	Nippobare	Root	TSB	1	Rice	WildType
L1P20C8	CACGCTACGAGTGGCC	AACMGGATTAGATACCCKG	ACGTCATCCCCACCTTCC	CACGCTACGA	GTGGCC	L1	P20	C8	Nippobare	Root	TSB	1	Rice	WildType
L1P20C9	CACGCTACGTGTGGCC	AACMGGATTAGATACCCKG	ACGTCATCCCCACCTTCC	CACGCTACGT	GTGGCC	L1	P20	C9	Nippobare	Root	TSB	1	Rice	WildType
L1P20C10	CAGTAGACGTGTGGCC	AACMGGATTAGATACCCKG	ACGTCATCCCCACCTTCC	CAGTAGACGT	GTGGCC	L1	P20	C10	Nippobare	Root	TSB	1	Rice	WildType
L1P20C11	CGACGTGACTGTGGCC	AACMGGATTAGATACCCKG	ACGTCATCCCCACCTTCC	CGACGTGACT	GTGGCC	L1	P20	C11	Nippobare	Root	TSB	1	Rice	WildType
L1P20C12	CAGTCTCTAGGTGGCC	AACMGGATTAGATACCCKG	ACGTCATCCCCACCTTCC	CAGTCTCTAG	GTGGCC	L1	P20	C12	Nippobare	Root	TSB	1	Rice	WildType
L1P20D1	TACACGTGATGTGGCC	AACMGGATTAGATACCCKG	ACGTCATCCCCACCTTCC	TACACGTGAT	GTGGCC	L1	P20	D1	Nippobare	Root	TSB	1	Rice	WildType
L1P20D2	TACAGATCGTGTGGCC	AACMGGATTAGATACCCKG	ACGTCATCCCCACCTTCC	TACAGATCGT	GTGGCC	L1	P20	D2	Nippobare	Root	TSB	1	Rice	WildType
L1P20D3	TACGCTGTCTGTGGCC	AACMGGATTAGATACCCKG	ACGTCATCCCCACCTTCC	TACGCTGTCT	GTGGCC	L1	P20	D3	Nippobare	Root	TSB	1	Rice	WildType
L1P20D4	TAGTGTAGATGTGGCC	AACMGGATTAGATACCCKG	ACGTCATCCCCACCTTCC	TAGTGTAGAT	GTGGCC	L1	P20	D4	Nippobare	Root	TSB	1	Rice	WildType
L1P20D5	TCGATCACGTGTGGCC	AACMGGATTAGATACCCKG	ACGTCATCCCCACCTTCC	TCGATCACGT	GTGGCC	L1	P20	D5	Nippobare	Root	TSB	1	Rice	WildType
L1P20D6	TCGCACTAGTGTGGCC	AACMGGATTAGATACCCKG	ACGTCATCCCCACCTTCC	TCGCACTAGT	GTGGCC	L1	P20	D6	Nippobare	Root	TSB	1	Rice	WildType
L1P20D7	TCTAGCGACTGTGGCC	AACMGGATTAGATACCCKG	ACGTCATCCCCACCTTCC	TCTAGCGACT	GTGGCC	L1	P20	D7	Nippobare	Root	TSB	1	Rice	WildType
L1P20D8	CACGTGTATAGTGGCC	AACMGGATTAGATACCCKG	ACGTCATCCCCACCTTCC	CACGTGTATA	GTGGCC	L1	P20	D8	Nippobare	Root	TSB	1	Rice	WildType
L1P20D9	TGACGTATGTGTGGCC	AACMGGATTAGATACCCKG	ACGTCATCCCCACCTTCC	TGACGTATGT	GTGGCC	L1	P20	D9	Nippobare	Root	TSB	1	Rice	WildType
L1P20D10	CACTACGATGGTGGCC	AACMGGATTAGATACCCKG	ACGTCATCCCCACCTTCC	CACTACGATG	GTGGCC	L1	P20	D10	Nippobare	Root	TSB	1	Rice	WildType
L1P20D11	ACAGTATATAGTGGCC	AACMGGATTAGATACCCKG	ACGTCATCCCCACCTTCC	ACAGTATATA	GTGGCC	L1	P20	D11	Nippobare	Root	TSB	1	Rice	WildType
L1P20D12	ACGCGATCGAGTGGCC	AACMGGATTAGATACCCKG	ACGTCATCCCCACCTTCC	ACGCGATCGA	GTGGCC	L1	P20	D12	Nippobare	Root	TSB	1	Rice	WildType
L1P20E1	ACTAGCAGTAGTGGCC	AACMGGATTAGATACCCKG	ACGTCATCCCCACCTTCC	ACTAGCAGTA	GTGGCC	L1	P20	E1	Nippobare	Root	TSB	1	Rice	WildType
L1P20E2	AGCTCACGTAGTGGCC	AACMGGATTAGATACCCKG	ACGTCATCCCCACCTTCC	AGCTCACGTA	GTGGCC	L1	P20	E2	Nippobare	Root	TSB	1	Rice	WildType
L1P20E3	AGTATACATAGTGGCC	AACMGGATTAGATACCCKG	ACGTCATCCCCACCTTCC	AGTATACATA	GTGGCC	L1	P20	E3	Nippobare	Root	TSB	1	Rice	WildType
L1P20E4	AGTCGAGAGAGTGGCC	AACMGGATTAGATACCCKG	ACGTCATCCCCACCTTCC	AGTCGAGAGA	GTGGCC	L1	P20	E4	Nippobare	Root	TSB	1	Rice	WildType
L1P20E5	AGTGCTACGAGTGGCC	AACMGGATTAGATACCCKG	ACGTCATCCCCACCTTCC	AGTGCTACGA	GTGGCC	L1	P20	E5	Nippobare	Root	TSB	1	Rice	WildType
L1P20E6	CGATCGTATAGTGGCC	AACMGGATTAGATACCCKG	ACGTCATCCCCACCTTCC	CGATCGTATA	GTGGCC	L1	P20	E6	Nippobare	Root	TSB	1	Rice	WildType
L1P20E7	CGCAGTACGAGTGGCC	AACMGGATTAGATACCCKG	ACGTCATCCCCACCTTCC	CGCAGTACGA	GTGGCC	L1	P20	E7	Nippobare	Root	TSB	1	Rice	WildType
L1P20E8	CGCGTATACAGTGGCC	AACMGGATTAGATACCCKG	ACGTCATCCCCACCTTCC	CGCGTATACA	GTGGCC	L1	P20	E8	Nippobare	Root	TSB	1	Rice	WildType
L1P20E9	CGTACAGTCAGTGGCC	AACMGGATTAGATACCCKG	ACGTCATCCCCACCTTCC	CGTACAGTCA	GTGGCC	L1	P20	E9	Nippobare	Root	TSB	1	Rice	WildType
L1P20E10	CGTACTCAGAGTGGCC	AACMGGATTAGATACCCKG	ACGTCATCCCCACCTTCC	CGTACTCAGA	GTGGCC	L1	P20	E10	Nippobare	Root	TSB	1	Rice	WildType
L1P20E11	CTACGCTCTAGTGGCC	AACMGGATTAGATACCCKG	ACGTCATCCCCACCTTCC	CTACGCTCTA	GTGGCC	L1	P20	E11	Nippobare	Root	TSB	1	Rice	WildType
L1P20E12	CTATAGCGTAGTGGCC	AACMGGATTAGATACCCKG	ACGTCATCCCCACCTTCC	CTATAGCGTA	GTGGCC	L1	P20	E12	Nippobare	Root	TSB	1	Rice	WildType
L1P20F1	TACGTCATCAGTGGCC	AACMGGATTAGATACCCKG	ACGTCATCCCCACCTTCC	TACGTCATCA	GTGGCC	L1	P20	F1	Nippobare	Root	TSB	1	Rice	WildType
L1P20F2	TAGTCGCATAGTGGCC	AACMGGATTAGATACCCKG	ACGTCATCCCCACCTTCC	TAGTCGCATA	GTGGCC	L1	P20	F2	Nippobare	Root	TSB	1	Rice	WildType
L1P20F3	TATATATACAGTGGCC	AACMGGATTAGATACCCKG	ACGTCATCCCCACCTTCC	TATATATACA	GTGGCC	L1	P20	F3	Nippobare	Root	TSB	1	Rice	WildType
L1P20F4	TATGCTAGTAGTGGCC	AACMGGATTAGATACCCKG	ACGTCATCCCCACCTTCC	TATGCTAGTA	GTGGCC	L1	P20	F4	Nippobare	Root	TSB	1	Rice	WildType
L1P20F5	TCACGCGAGAGTGGCC	AACMGGATTAGATACCCKG	ACGTCATCCCCACCTTCC	TCACGCGAGA	GTGGCC	L1	P20	F5	Nippobare	Root	TSB	1	Rice	WildType
L1P20F6	TCGATAGTGAGTGGCC	AACMGGATTAGATACCCKG	ACGTCATCCCCACCTTCC	TCGATAGTGA	GTGGCC	L1	P20	F6	Nippobare	Root	TSB	1	Rice	WildType
L1P20F7	TCGCTGCGTAGTGGCC	AACMGGATTAGATACCCKG	ACGTCATCCCCACCTTCC	TCGCTGCGTA	GTGGCC	L1	P20	F7	Nippobare	Root	TSB	1	Rice	WildType
L1P20F8	TCTGACGTCAGTGGCC	AACMGGATTAGATACCCKG	ACGTCATCCCCACCTTCC	TCTGACGTCA	GTGGCC	L1	P20	F8	Nippobare	Root	TSB	1	Rice	WildType
L1P20F9	TGAGTCAGTAGTGGCC	AACMGGATTAGATACCCKG	ACGTCATCCCCACCTTCC	TGAGTCAGTA	GTGGCC	L1	P20	F9	Nippobare	Root	TSB	1	Rice	WildType
L1P20F10	CACTATACTCGTGGCC	AACMGGATTAGATACCCKG	ACGTCATCCCCACCTTCC	CACTATACTC	GTGGCC	L1	P20	F10	Nippobare	Root	TSB	1	Rice	WildType
L1P20F11	TGTCACACGAGTGGCC	AACMGGATTAGATACCCKG	ACGTCATCCCCACCTTCC	TGTCACACGA	GTGGCC	L1	P20	F11	Nippobare	Root	TSB	1	Rice	WildType
L1P20F12	TGTCGTCGCAGTGGCC	AACMGGATTAGATACCCKG	ACGTCATCCCCACCTTCC	TGTCGTCGCA	GTGGCC	L1	P20	F12	Nippobare	Root	TSB	1	Rice	WildType
L1P20G1	ACACATACGCGTGGCC	AACMGGATTAGATACCCKG	ACGTCATCCCCACCTTCC	ACACATACGC	GTGGCC	L1	P20	G1	Nippobare	Root	TSB	1	Rice	WildType
L1P20G2	ACAGTCGTGCGTGGCC	AACMGGATTAGATACCCKG	ACGTCATCCCCACCTTCC	ACAGTCGTGC	GTGGCC	L1	P20	G2	Nippobare	Root	TSB	1	Rice	WildType
L1P20G3	ACATGACGACGTGGCC	AACMGGATTAGATACCCKG	ACGTCATCCCCACCTTCC	ACATGACGAC	GTGGCC	L1	P20	G3	Nippobare	Root	TSB	1	Rice	WildType
L1P20G4	ACGACAGCTCGTGGCC	AACMGGATTAGATACCCKG	ACGTCATCCCCACCTTCC	ACGACAGCTC	GTGGCC	L1	P20	G4	Nippobare	Root	TSB	1	Rice	WildType
L1P20G5	ACGTCTCATCGTGGCC	AACMGGATTAGATACCCKG	ACGTCATCCCCACCTTCC	ACGTCTCATC	GTGGCC	L1	P20	G5	Nippobare	Root	TSB	1	Rice	WildType
L1P20G6	ACTCATCTACGTGGCC	AACMGGATTAGATACCCKG	ACGTCATCCCCACCTTCC	ACTCATCTAC	GTGGCC	L1	P20	G6	Nippobare	Root	TSB	1	Rice	WildType
L1P20G7	ACTCGCGCACGTGGCC	AACMGGATTAGATACCCKG	ACGTCATCCCCACCTTCC	ACTCGCGCAC	GTGGCC	L1	P20	G7	Nippobare	Root	TSB	1	Rice	WildType
L1P20G8	AGAGCGTCACGTGGCC	AACMGGATTAGATACCCKG	ACGTCATCCCCACCTTCC	AGAGCGTCAC	GTGGCC	L1	P20	G8	Nippobare	Root	TSB	1	Rice	WildType
L1P20G9	AGCGACTAGCGTGGCC	AACMGGATTAGATACCCKG	ACGTCATCCCCACCTTCC	AGCGACTAGC	GTGGCC	L1	P20	G9	Nippobare	Root	TSB	1	Rice	WildType
L1P20G10	CAGCGTACTGGTGGCC	AACMGGATTAGATACCCKG	ACGTCATCCCCACCTTCC	CAGCGTACTG	GTGGCC	L1	P20	G10	Nippobare	Root	TSB	1	Rice	WildType
L1P20G11	AGTGACACACGTGGCC	AACMGGATTAGATACCCKG	ACGTCATCCCCACCTTCC	AGTGACACAC	GTGGCC	L1	P20	G11	Nippobare	Root	TSB	1	Rice	WildType
L1P20G12	AGTGTATGTCGTGGCC	AACMGGATTAGATACCCKG	ACGTCATCCCCACCTTCC	AGTGTATGTC	GTGGCC	L1	P20	G12	Nippobare	Root	TSB	1	Rice	WildType
L1P20H1	ATAGATAGACGTGGCC	AACMGGATTAGATACCCKG	ACGTCATCCCCACCTTCC	ATAGATAGAC	GTGGCC	L1	P20	H1	Nippobare	Root	TSB	1	Rice	WildType
L1P20H2	ATATAGTCGCGTGGCC	AACMGGATTAGATACCCKG	ACGTCATCCCCACCTTCC	ATATAGTCGC	GTGGCC	L1	P20	H2	Nippobare	Root	TSB	1	Rice	WildType
L1P20H3	ATCTACTGACGTGGCC	AACMGGATTAGATACCCKG	ACGTCATCCCCACCTTCC	ATCTACTGAC	GTGGCC	L1	P20	H3	Nippobare	Root	TSB	1	Rice	WildType
L1P20H4	CACGTAGATCGTGGCC	AACMGGATTAGATACCCKG	ACGTCATCCCCACCTTCC	CACGTAGATC	GTGGCC	L1	P20	H4	Nippobare	Root	TSB	1	Rice	WildType
L1P20H5	CACGTCTCGCGTGGCC	AACMGGATTAGATACCCKG	ACGTCATCCCCACCTTCC	CACGTCTCGC	GTGGCC	L1	P20	H5	Nippobare	Root	TSB	1	Rice	WildType
L1P20H6	CATACTCTACGTGGCC	AACMGGATTAGATACCCKG	ACGTCATCCCCACCTTCC	CATACTCTAC	GTGGCC	L1	P20	H6	Nippobare	Root	TSB	1	Rice	WildType
L1P20H7	CGACACTATCGTGGCC	AACMGGATTAGATACCCKG	ACGTCATCCCCACCTTCC	CGACACTATC	GTGGCC	L1	P20	H7	Nippobare	Root	TSB	1	Rice	WildType
L1P20H8	CGAGACGCGCGTGGCC	AACMGGATTAGATACCCKG	ACGTCATCCCCACCTTCC	CGAGACGCGC	GTGGCC	L1	P20	H8	Nippobare	Root	TSB	1	Rice	WildType
L1P20H9	CGTATGCGACGTGGCC	AACMGGATTAGATACCCKG	ACGTCATCCCCACCTTCC	CGTATGCGAC	GTGGCC	L1	P20	H9	Nippobare	Root	TSB	1	Rice	WildType
L1P20H10	CGTCGATCTCGTGGCC	AACMGGATTAGATACCCKG	ACGTCATCCCCACCTTCC	CGTCGATCTC	GTGGCC	L1	P20	H10	Nippobare	Root	TSB	1	Rice	WildType
L1P20H11	CTACGACTGCGTGGCC	AACMGGATTAGATACCCKG	ACGTCATCCCCACCTTCC	CTACGACTGC	GTGGCC	L1	P20	H11	Nippobare	Root	TSB	1	Rice	WildType
L1P20H12	CTAGTCACTCGTGGCC	AACMGGATTAGATACCCKG	ACGTCATCCCCACCTTCC	CTAGTCACTC	GTGGCC	L1	P20	H12	Nippobare	Root	TSB	1	Rice	WildType
L1P21A1	ACGCTCGACAGTTTCG	AACMGGATTAGATACCCKG	ACGTCATCCCCACCTTCC	ACGCTCGACA	GTTTCG	L1	P21	A1	Nippobare	Root	TSB	1	Rice	WildType
L1P21A2	AGACGCACTCGTTTCG	AACMGGATTAGATACCCKG	ACGTCATCCCCACCTTCC	AGACGCACTC	GTTTCG	L1	P21	A2	Nippobare	Root	TSB	1	Rice	WildType
L1P21A3	AGCACTGTAGGTTTCG	AACMGGATTAGATACCCKG	ACGTCATCCCCACCTTCC	AGCACTGTAG	GTTTCG	L1	P21	A3	Nippobare	Root	TSB	1	Rice	WildType
L1P21A4	ATCAGACACGGTTTCG	AACMGGATTAGATACCCKG	ACGTCATCCCCACCTTCC	ATCAGACACG	GTTTCG	L1	P21	A4	Nippobare	Root	TSB	1	Rice	WildType
L1P21A5	ATATCGCGAGGTTTCG	AACMGGATTAGATACCCKG	ACGTCATCCCCACCTTCC	ATATCGCGAG	GTTTCG	L1	P21	A5	Nippobare	Root	TSB	1	Rice	WildType
L1P21A6	CACGAGACAGGTTTCG	AACMGGATTAGATACCCKG	ACGTCATCCCCACCTTCC	CACGAGACAG	GTTTCG	L1	P21	A6	Nippobare	Root	TSB	1	Rice	WildType
L1P21A7	CTCGCGTGTCGTTTCG	AACMGGATTAGATACCCKG	ACGTCATCCCCACCTTCC	CTCGCGTGTC	GTTTCG	L1	P21	A7	Nippobare	Root	TSB	1	Rice	WildType
L1P21A8	TAGTATCAGCGTTTCG	AACMGGATTAGATACCCKG	ACGTCATCCCCACCTTCC	TAGTATCAGC	GTTTCG	L1	P21	A8	Nippobare	Root	TSB	1	Rice	WildType
L1P21A9	TCTCTATGCGGTTTCG	AACMGGATTAGATACCCKG	ACGTCATCCCCACCTTCC	TCTCTATGCG	GTTTCG	L1	P21	A9	Nippobare	Root	TSB	1	Rice	WildType
L1P21A10	TGATACGTCTGTTTCG	AACMGGATTAGATACCCKG	ACGTCATCCCCACCTTCC	TGATACGTCT	GTTTCG	L1	P21	A10	Nippobare	Root	TSB	1	Rice	WildType
L1P21A11	TACTGAGCTAGTTTCG	AACMGGATTAGATACCCKG	ACGTCATCCCCACCTTCC	TACTGAGCTA	GTTTCG	L1	P21	A11	Nippobare	Root	TSB	1	Rice	WildType
L1P21A12	CATAGTAGTGGTTTCG	AACMGGATTAGATACCCKG	ACGTCATCCCCACCTTCC	CATAGTAGTG	GTTTCG	L1	P21	A12	Nippobare	Root	TSB	1	Rice	WildType
L1P21B1	CGAGAGATACGTTTCG	AACMGGATTAGATACCCKG	ACGTCATCCCCACCTTCC	CGAGAGATAC	GTTTCG	L1	P21	B1	Nippobare	Root	TSB	1	Rice	WildType
L1P21B2	ATACGACGTAGTTTCG	AACMGGATTAGATACCCKG	ACGTCATCCCCACCTTCC	ATACGACGTA	GTTTCG	L1	P21	B2	Nippobare	Root	TSB	1	Rice	WildType
L1P21B3	TCACGTACTAGTTTCG	AACMGGATTAGATACCCKG	ACGTCATCCCCACCTTCC	TCACGTACTA	GTTTCG	L1	P21	B3	Nippobare	Root	TSB	1	Rice	WildType
L1P21B4	CGTCTAGTACGTTTCG	AACMGGATTAGATACCCKG	ACGTCATCCCCACCTTCC	CGTCTAGTAC	GTTTCG	L1	P21	B4	Nippobare	Root	TSB	1	Rice	WildType
L1P21B5	TCTACGTAGCGTTTCG	AACMGGATTAGATACCCKG	ACGTCATCCCCACCTTCC	TCTACGTAGC	GTTTCG	L1	P21	B5	Nippobare	Root	TSB	1	Rice	WildType
L1P21B6	CACGCGAGTCGTTTCG	AACMGGATTAGATACCCKG	ACGTCATCCCCACCTTCC	CACGCGAGTC	GTTTCG	L1	P21	B6	Nippobare	Root	TSB	1	Rice	WildType
L1P21B7	ACGACTACAGGTTTCG	AACMGGATTAGATACCCKG	ACGTCATCCCCACCTTCC	ACGACTACAG	GTTTCG	L1	P21	B7	Nippobare	Root	TSB	1	Rice	WildType
L1P21B8	CGTAGACTAGGTTTCG	AACMGGATTAGATACCCKG	ACGTCATCCCCACCTTCC	CGTAGACTAG	GTTTCG	L1	P21	B8	Nippobare	Root	TSB	1	Rice	WildType
L1P21B9	TACGAGTATGGTTTCG	AACMGGATTAGATACCCKG	ACGTCATCCCCACCTTCC	TACGAGTATG	GTTTCG	L1	P21	B9	Nippobare	Root	TSB	1	Rice	WildType
L1P21B10	TACTCTCGTGGTTTCG	AACMGGATTAGATACCCKG	ACGTCATCCCCACCTTCC	TACTCTCGTG	GTTTCG	L1	P21	B10	Nippobare	Root	TSB	1	Rice	WildType
L1P21B11	TAGAGACGAGGTTTCG	AACMGGATTAGATACCCKG	ACGTCATCCCCACCTTCC	TAGAGACGAG	GTTTCG	L1	P21	B11	Nippobare	Root	TSB	1	Rice	WildType
L1P21B12	TCGTCGCTCGGTTTCG	AACMGGATTAGATACCCKG	ACGTCATCCCCACCTTCC	TCGTCGCTCG	GTTTCG	L1	P21	B12	Nippobare	Root	TSB	1	Rice	WildType
L1P21C1	ACATACGCGTGTTTCG	AACMGGATTAGATACCCKG	ACGTCATCCCCACCTTCC	ACATACGCGT	GTTTCG	L1	P21	C1	Nippobare	Root	TSB	1	Rice	WildType
L1P21C2	ACGCGAGTATGTTTCG	AACMGGATTAGATACCCKG	ACGTCATCCCCACCTTCC	ACGCGAGTAT	GTTTCG	L1	P21	C2	Nippobare	Root	TSB	1	Rice	WildType
L1P21C3	ACTACTATGTGTTTCG	AACMGGATTAGATACCCKG	ACGTCATCCCCACCTTCC	ACTACTATGT	GTTTCG	L1	P21	C3	Nippobare	Root	TSB	1	Rice	WildType
L1P21C4	ACTGTACAGTGTTTCG	AACMGGATTAGATACCCKG	ACGTCATCCCCACCTTCC	ACTGTACAGT	GTTTCG	L1	P21	C4	Nippobare	Root	TSB	1	Rice	WildType
L1P21C5	AGACTATACTGTTTCG	AACMGGATTAGATACCCKG	ACGTCATCCCCACCTTCC	AGACTATACT	GTTTCG	L1	P21	C5	Nippobare	Root	TSB	1	Rice	WildType
L1P21C6	AGCGTCGTCTGTTTCG	AACMGGATTAGATACCCKG	ACGTCATCCCCACCTTCC	AGCGTCGTCT	GTTTCG	L1	P21	C6	Nippobare	Root	TSB	1	Rice	WildType
L1P21C7	AGTACGCTATGTTTCG	AACMGGATTAGATACCCKG	ACGTCATCCCCACCTTCC	AGTACGCTAT	GTTTCG	L1	P21	C7	Nippobare	Root	TSB	1	Rice	WildType
L1P21C8	CACGCTACGAGTTTCG	AACMGGATTAGATACCCKG	ACGTCATCCCCACCTTCC	CACGCTACGA	GTTTCG	L1	P21	C8	Nippobare	Root	TSB	1	Rice	WildType
L1P21C9	CACGCTACGTGTTTCG	AACMGGATTAGATACCCKG	ACGTCATCCCCACCTTCC	CACGCTACGT	GTTTCG	L1	P21	C9	Nippobare	Root	TSB	1	Rice	WildType
L1P21C10	CAGTAGACGTGTTTCG	AACMGGATTAGATACCCKG	ACGTCATCCCCACCTTCC	CAGTAGACGT	GTTTCG	L1	P21	C10	Nippobare	Root	TSB	1	Rice	WildType
L1P21C11	CGACGTGACTGTTTCG	AACMGGATTAGATACCCKG	ACGTCATCCCCACCTTCC	CGACGTGACT	GTTTCG	L1	P21	C11	Nippobare	Root	TSB	1	Rice	WildType
L1P21C12	CAGTCTCTAGGTTTCG	AACMGGATTAGATACCCKG	ACGTCATCCCCACCTTCC	CAGTCTCTAG	GTTTCG	L1	P21	C12	Nippobare	Root	TSB	1	Rice	WildType
L1P21D1	TACACGTGATGTTTCG	AACMGGATTAGATACCCKG	ACGTCATCCCCACCTTCC	TACACGTGAT	GTTTCG	L1	P21	D1	Nippobare	Root	TSB	1	Rice	WildType
L1P21D2	TACAGATCGTGTTTCG	AACMGGATTAGATACCCKG	ACGTCATCCCCACCTTCC	TACAGATCGT	GTTTCG	L1	P21	D2	Nippobare	Root	TSB	1	Rice	WildType
L1P21D3	TACGCTGTCTGTTTCG	AACMGGATTAGATACCCKG	ACGTCATCCCCACCTTCC	TACGCTGTCT	GTTTCG	L1	P21	D3	Nippobare	Root	TSB	1	Rice	WildType
L1P21D4	TAGTGTAGATGTTTCG	AACMGGATTAGATACCCKG	ACGTCATCCCCACCTTCC	TAGTGTAGAT	GTTTCG	L1	P21	D4	Nippobare	Root	TSB	1	Rice	WildType
L1P21D5	TCGATCACGTGTTTCG	AACMGGATTAGATACCCKG	ACGTCATCCCCACCTTCC	TCGATCACGT	GTTTCG	L1	P21	D5	Nippobare	Root	TSB	1	Rice	WildType
L1P21D6	TCGCACTAGTGTTTCG	AACMGGATTAGATACCCKG	ACGTCATCCCCACCTTCC	TCGCACTAGT	GTTTCG	L1	P21	D6	Nippobare	Root	TSB	1	Rice	WildType
L1P21D7	TCTAGCGACTGTTTCG	AACMGGATTAGATACCCKG	ACGTCATCCCCACCTTCC	TCTAGCGACT	GTTTCG	L1	P21	D7	Nippobare	Root	TSB	1	Rice	WildType
L1P21D8	CACGTGTATAGTTTCG	AACMGGATTAGATACCCKG	ACGTCATCCCCACCTTCC	CACGTGTATA	GTTTCG	L1	P21	D8	Nippobare	Root	TSB	1	Rice	WildType
L1P21D9	TGACGTATGTGTTTCG	AACMGGATTAGATACCCKG	ACGTCATCCCCACCTTCC	TGACGTATGT	GTTTCG	L1	P21	D9	Nippobare	Root	TSB	1	Rice	WildType
L1P21D10	CACTACGATGGTTTCG	AACMGGATTAGATACCCKG	ACGTCATCCCCACCTTCC	CACTACGATG	GTTTCG	L1	P21	D10	Nippobare	Root	TSB	1	Rice	WildType
L1P21D11	ACAGTATATAGTTTCG	AACMGGATTAGATACCCKG	ACGTCATCCCCACCTTCC	ACAGTATATA	GTTTCG	L1	P21	D11	Nippobare	Root	TSB	1	Rice	WildType
L1P21D12	ACGCGATCGAGTTTCG	AACMGGATTAGATACCCKG	ACGTCATCCCCACCTTCC	ACGCGATCGA	GTTTCG	L1	P21	D12	Nippobare	Root	TSB	1	Rice	WildType
L1P21E1	ACTAGCAGTAGTTTCG	AACMGGATTAGATACCCKG	ACGTCATCCCCACCTTCC	ACTAGCAGTA	GTTTCG	L1	P21	E1	Nippobare	Root	TSB	1	Rice	WildType
L1P21E2	AGCTCACGTAGTTTCG	AACMGGATTAGATACCCKG	ACGTCATCCCCACCTTCC	AGCTCACGTA	GTTTCG	L1	P21	E2	Nippobare	Root	TSB	1	Rice	WildType
L1P21E3	AGTATACATAGTTTCG	AACMGGATTAGATACCCKG	ACGTCATCCCCACCTTCC	AGTATACATA	GTTTCG	L1	P21	E3	Nippobare	Root	TSB	1	Rice	WildType
L1P21E4	AGTCGAGAGAGTTTCG	AACMGGATTAGATACCCKG	ACGTCATCCCCACCTTCC	AGTCGAGAGA	GTTTCG	L1	P21	E4	Nippobare	Root	TSB	1	Rice	WildType
L1P21E5	AGTGCTACGAGTTTCG	AACMGGATTAGATACCCKG	ACGTCATCCCCACCTTCC	AGTGCTACGA	GTTTCG	L1	P21	E5	Nippobare	Root	TSB	1	Rice	WildType
L1P21E6	CGATCGTATAGTTTCG	AACMGGATTAGATACCCKG	ACGTCATCCCCACCTTCC	CGATCGTATA	GTTTCG	L1	P21	E6	Nippobare	Root	TSB	1	Rice	WildType
L1P21E7	CGCAGTACGAGTTTCG	AACMGGATTAGATACCCKG	ACGTCATCCCCACCTTCC	CGCAGTACGA	GTTTCG	L1	P21	E7	Nippobare	Root	TSB	1	Rice	WildType
L1P21E8	CGCGTATACAGTTTCG	AACMGGATTAGATACCCKG	ACGTCATCCCCACCTTCC	CGCGTATACA	GTTTCG	L1	P21	E8	Nippobare	Root	TSB	1	Rice	WildType
L1P21E9	CGTACAGTCAGTTTCG	AACMGGATTAGATACCCKG	ACGTCATCCCCACCTTCC	CGTACAGTCA	GTTTCG	L1	P21	E9	Nippobare	Root	TSB	1	Rice	WildType
L1P21E10	CGTACTCAGAGTTTCG	AACMGGATTAGATACCCKG	ACGTCATCCCCACCTTCC	CGTACTCAGA	GTTTCG	L1	P21	E10	Nippobare	Root	TSB	1	Rice	WildType
L1P21E11	CTACGCTCTAGTTTCG	AACMGGATTAGATACCCKG	ACGTCATCCCCACCTTCC	CTACGCTCTA	GTTTCG	L1	P21	E11	Nippobare	Root	TSB	1	Rice	WildType
L1P21E12	CTATAGCGTAGTTTCG	AACMGGATTAGATACCCKG	ACGTCATCCCCACCTTCC	CTATAGCGTA	GTTTCG	L1	P21	E12	Nippobare	Root	TSB	1	Rice	WildType
L1P21F1	TACGTCATCAGTTTCG	AACMGGATTAGATACCCKG	ACGTCATCCCCACCTTCC	TACGTCATCA	GTTTCG	L1	P21	F1	Nippobare	Root	TSB	1	Rice	WildType
L1P21F2	TAGTCGCATAGTTTCG	AACMGGATTAGATACCCKG	ACGTCATCCCCACCTTCC	TAGTCGCATA	GTTTCG	L1	P21	F2	Nippobare	Root	TSB	1	Rice	WildType
L1P21F3	TATATATACAGTTTCG	AACMGGATTAGATACCCKG	ACGTCATCCCCACCTTCC	TATATATACA	GTTTCG	L1	P21	F3	Nippobare	Root	TSB	1	Rice	WildType
L1P21F4	TATGCTAGTAGTTTCG	AACMGGATTAGATACCCKG	ACGTCATCCCCACCTTCC	TATGCTAGTA	GTTTCG	L1	P21	F4	Nippobare	Root	TSB	1	Rice	WildType
L1P21F5	TCACGCGAGAGTTTCG	AACMGGATTAGATACCCKG	ACGTCATCCCCACCTTCC	TCACGCGAGA	GTTTCG	L1	P21	F5	Nippobare	Root	TSB	1	Rice	WildType
L1P21F6	TCGATAGTGAGTTTCG	AACMGGATTAGATACCCKG	ACGTCATCCCCACCTTCC	TCGATAGTGA	GTTTCG	L1	P21	F6	Nippobare	Root	TSB	1	Rice	WildType
L1P21F7	TCGCTGCGTAGTTTCG	AACMGGATTAGATACCCKG	ACGTCATCCCCACCTTCC	TCGCTGCGTA	GTTTCG	L1	P21	F7	Nippobare	Root	TSB	1	Rice	WildType
L1P21F8	TCTGACGTCAGTTTCG	AACMGGATTAGATACCCKG	ACGTCATCCCCACCTTCC	TCTGACGTCA	GTTTCG	L1	P21	F8	Nippobare	Root	TSB	1	Rice	WildType
L1P21F9	TGAGTCAGTAGTTTCG	AACMGGATTAGATACCCKG	ACGTCATCCCCACCTTCC	TGAGTCAGTA	GTTTCG	L1	P21	F9	Nippobare	Root	TSB	1	Rice	WildType
L1P21F10	CACTATACTCGTTTCG	AACMGGATTAGATACCCKG	ACGTCATCCCCACCTTCC	CACTATACTC	GTTTCG	L1	P21	F10	Nippobare	Root	TSB	1	Rice	WildType
L1P21F11	TGTCACACGAGTTTCG	AACMGGATTAGATACCCKG	ACGTCATCCCCACCTTCC	TGTCACACGA	GTTTCG	L1	P21	F11	Nippobare	Root	TSB	1	Rice	WildType
L1P21F12	TGTCGTCGCAGTTTCG	AACMGGATTAGATACCCKG	ACGTCATCCCCACCTTCC	TGTCGTCGCA	GTTTCG	L1	P21	F12	Nippobare	Root	TSB	1	Rice	WildType
L1P21G1	ACACATACGCGTTTCG	AACMGGATTAGATACCCKG	ACGTCATCCCCACCTTCC	ACACATACGC	GTTTCG	L1	P21	G1	Nippobare	Root	TSB	1	Rice	WildType
L1P21G2	ACAGTCGTGCGTTTCG	AACMGGATTAGATACCCKG	ACGTCATCCCCACCTTCC	ACAGTCGTGC	GTTTCG	L1	P21	G2	Nippobare	Root	TSB	1	Rice	WildType
L1P21G3	ACATGACGACGTTTCG	AACMGGATTAGATACCCKG	ACGTCATCCCCACCTTCC	ACATGACGAC	GTTTCG	L1	P21	G3	Nippobare	Root	TSB	1	Rice	WildType
L1P21G4	ACGACAGCTCGTTTCG	AACMGGATTAGATACCCKG	ACGTCATCCCCACCTTCC	ACGACAGCTC	GTTTCG	L1	P21	G4	Nippobare	Root	TSB	1	Rice	WildType
L1P21G5	ACGTCTCATCGTTTCG	AACMGGATTAGATACCCKG	ACGTCATCCCCACCTTCC	ACGTCTCATC	GTTTCG	L1	P21	G5	Nippobare	Root	TSB	1	Rice	WildType
L1P21G6	ACTCATCTACGTTTCG	AACMGGATTAGATACCCKG	ACGTCATCCCCACCTTCC	ACTCATCTAC	GTTTCG	L1	P21	G6	Nippobare	Root	TSB	1	Rice	WildType
[truncated: 2,322 more rows]
