# Supplementary material for: High-throughput cultivation and identification of bacteria from the plant root microbiota
Source: Springer Nature journal article supplement (doi:10.1038/s41596-020-00444-7), 2021-01-13
Supplement: MOESM7 [file 41596_2020_444_MOESM7_ESM22.xlsx]

## Sheet: ST6a
Supplementary Table 6 | Data to generate anticipated results in Fig. 6.
Supplementary Table 6a |Read counts in each plate generated by the two-sided barcode system in Fig. 6a
Plates	Count of reads
P01	10603
P02	14279
P03	23710
P04	22476
P05	21750
P06	24901
P07	21882
P08	23231
P09	18840
P10	13425
P11	19979
P12	13140
P13	19957
P14	22484
P15	16272
P16	16089
P17	21138
P18	19536
P19	19678
P20	21493
P21	16569
P22	25975
P23	25114
P24	29072
P25	22839
P26	23401
P27	18099
P28	19547
P29	17098
P30	23369
P31	19275
P32	16999
P33	19775
P34	16665
P35	15776
P36	15725
P37	27446
P38	13241
P39	15674
P40	18847
P41	19843
P42	19706
P43	20669
P44	16444
P45	13394

## Sheet: ST6b
Supplementary Table 6b |Read counts for the negative (nuclease-free water as the PCR template) and positive controls (E. coli DNA as the PCR template) in Fig. 6b.
Sample	readssum	library	plate	Controls	row	column
L1P01A12	0	L1	P01	Negative	A	12
L1P02A12	0	L1	P02	Negative	A	12
L1P03A12	0	L1	P03	Negative	A	12
L1P04A12	2	L1	P04	Negative	A	12
L1P05A12	1	L1	P05	Negative	A	12
L1P06A12	0	L1	P06	Negative	A	12
L1P07A12	13	L1	P07	Negative	A	12
L1P08A12	20	L1	P08	Negative	A	12
L1P09A12	14	L1	P09	Negative	A	12
L1P10A12	0	L1	P10	Negative	A	12
L1P11A12	0	L1	P11	Negative	A	12
L1P12A12	0	L1	P12	Negative	A	12
L1P13A12	0	L1	P13	Negative	A	12
L1P14A12	0	L1	P14	Negative	A	12
L1P15A12	0	L1	P15	Negative	A	12
L1P16A12	0	L1	P16	Negative	A	12
L1P17A12	0	L1	P17	Negative	A	12
L1P18A12	2	L1	P18	Negative	A	12
L1P19A12	0	L1	P19	Negative	A	12
L1P20A12	0	L1	P20	Negative	A	12
L1P21A12	0	L1	P21	Negative	A	12
L1P22A12	0	L1	P22	Negative	A	12
L1P23A12	0	L1	P23	Negative	A	12
L1P24A12	0	L1	P24	Negative	A	12
L1P25A12	0	L1	P25	Negative	A	12
L1P26A12	0	L1	P26	Negative	A	12
L1P27A12	0	L1	P27	Negative	A	12
L1P28A12	0	L1	P28	Negative	A	12
L1P29A12	0	L1	P29	Negative	A	12
L1P30A12	0	L1	P30	Negative	A	12
L1P31A12	1	L1	P31	Negative	A	12
L1P32A12	1	L1	P32	Negative	A	12
L1P33A12	0	L1	P33	Negative	A	12
L1P34A12	0	L1	P34	Negative	A	12
L1P35A12	1	L1	P35	Negative	A	12
L1P36A12	0	L1	P36	Negative	A	12
L1P37A12	0	L1	P37	Negative	A	12
L1P38A12	0	L1	P38	Negative	A	12
L1P39A12	0	L1	P39	Negative	A	12
L1P40A12	1	L1	P40	Negative	A	12
L1P41A12	1	L1	P41	Negative	A	12
L1P42A12	0	L1	P42	Negative	A	12
L1P43A12	0	L1	P43	Negative	A	12
L1P44A12	0	L1	P44	Negative	A	12
L1P45A12	0	L1	P45	Negative	A	12
L1P01B12	89	L1	P01	Positive	B	12
L1P02B12	505	L1	P02	Positive	B	12
L1P03B12	451	L1	P03	Positive	B	12
L1P04B12	124	L1	P04	Positive	B	12
L1P05B12	120	L1	P05	Positive	B	12
L1P06B12	132	L1	P06	Positive	B	12
L1P07B12	261	L1	P07	Positive	B	12
L1P08B12	339	L1	P08	Positive	B	12
L1P09B12	256	L1	P09	Positive	B	12
L1P10B12	240	L1	P10	Positive	B	12
L1P11B12	254	L1	P11	Positive	B	12
L1P12B12	219	L1	P12	Positive	B	12
L1P13B12	1852	L1	P13	Positive	B	12
L1P14B12	709	L1	P14	Positive	B	12
L1P15B12	119	L1	P15	Positive	B	12
L1P16B12	337	L1	P16	Positive	B	12
L1P17B12	587	L1	P17	Positive	B	12
L1P18B12	713	L1	P18	Positive	B	12
L1P19B12	610	L1	P19	Positive	B	12
L1P20B12	492	L1	P20	Positive	B	12
L1P21B12	926	L1	P21	Positive	B	12
L1P22B12	572	L1	P22	Positive	B	12
L1P23B12	804	L1	P23	Positive	B	12
L1P24B12	571	L1	P24	Positive	B	12
L1P25B12	1025	L1	P25	Positive	B	12
L1P26B12	32	L1	P26	Positive	B	12
L1P27B12	787	L1	P27	Positive	B	12
L1P28B12	514	L1	P28	Positive	B	12
L1P29B12	584	L1	P29	Positive	B	12
L1P30B12	783	L1	P30	Positive	B	12
L1P31B12	528	L1	P31	Positive	B	12
L1P32B12	480	L1	P32	Positive	B	12
L1P33B12	1061	L1	P33	Positive	B	12
L1P34B12	598	L1	P34	Positive	B	12
L1P35B12	743	L1	P35	Positive	B	12
L1P36B12	448	L1	P36	Positive	B	12
L1P37B12	131	L1	P37	Positive	B	12
L1P38B12	168	L1	P38	Positive	B	12
L1P39B12	212	L1	P39	Positive	B	12
L1P40B12	603	L1	P40	Positive	B	12
L1P41B12	1484	L1	P41	Positive	B	12
L1P42B12	1771	L1	P42	Positive	B	12
L1P43B12	75	L1	P43	Positive	B	12
L1P44B12	284	L1	P44	Positive	B	12
L1P45B12	280	L1	P45	Positive	B	12

## Sheet: ST6c
Supplementary Table 6c |ASVs based on the number of wells containing bacteria in Fig. 6c.
Well numbers	ASV number
100	78
100	88
100	89
100	71
100	85
100	79
100	87
100	101
100	91
100	89
100	79
100	98
100	93
100	101
100	90
100	91
100	89
100	83
100	88
100	92
100	84
100	78
100	84
100	89
100	81
100	110
100	98
100	76
100	97
100	78
200	137
200	125
200	129
200	118
200	155
200	127
200	133
200	137
200	136
200	142
200	130
200	141
200	141
200	149
200	140
200	130
200	137
200	136
200	125
200	137
200	152
200	112
200	126
200	135
200	137
200	130
200	140
200	139
200	164
200	124
300	186
300	173
300	173
300	172
300	159
300	170
300	179
300	167
300	161
300	166
300	174
300	167
300	172
300	168
300	174
300	183
300	183
300	184
300	194
300	157
300	159
300	162
300	168
300	165
300	153
300	158
300	178
300	172
300	164
300	169
400	209
400	206
400	209
400	194
400	199
400	210
400	203
400	205
400	190
400	202
400	196
400	180
400	186
400	199
400	196
400	205
400	200
400	187
400	203
400	190
400	206
400	191
400	198
400	207
400	193
400	194
400	192
400	201
400	187
400	212
500	222
500	223
500	221
500	219
500	230
500	212
500	223
500	219
500	234
500	219
500	225
500	232
500	220
500	222
500	219
500	222
500	216
500	215
500	241
500	222
500	207
500	214
500	217
500	213
500	219
500	224
500	214
500	222
500	222
500	237
600	236
600	243
600	242
600	237
600	252
600	224
600	244
600	245
600	245
600	250
600	253
600	240
600	244
600	254
600	245
600	244
600	241
600	245
600	240
600	239
600	240
600	245
600	236
600	231
600	228
600	244
600	238
600	253
600	219
600	238
700	266
700	240
700	245
700	267
700	260
700	252
700	269
700	272
700	265
700	264
700	253
700	264
700	270
700	261
700	260
700	265
700	259
700	248
700	254
700	255
700	259
700	269
700	260
700	260
700	263
700	241
700	266
700	258
700	265
700	251
800	272
800	268
800	268
800	267
800	273
800	284
800	271
800	271
800	279
800	277
800	265
800	270
800	268
800	263
800	270
800	282
800	267
800	259
800	274
800	260
800	283
800	275
800	275
800	275
800	269
800	279
800	275
800	270
800	280
800	270
900	282
900	287
900	293
900	280
900	286
900	293
900	274
900	298
900	298
900	278
900	287
900	273
900	293
900	289
900	275
900	283
900	297
900	286
900	292
900	298
900	285
900	277
900	270
900	280
900	286
900	286
900	282
900	279
900	268
900	280
1000	296
1000	288
1000	308
1000	298
1000	296
1000	300
1000	305
1000	310
1000	295
1000	306
1000	312
1000	302
1000	314
1000	314
1000	301
1000	290
1000	296
1000	297
1000	298
1000	302
1000	302
1000	294
1000	299
1000	303
1000	301
1000	303
1000	295
1000	290
1000	291
1000	292
1100	318
1100	313
1100	316
1100	318
1100	320
1100	306
1100	310
1100	306
1100	309
1100	314
1100	312
1100	321
1100	316
1100	307
1100	303
1100	309
1100	308
1100	317
1100	305
1100	311
1100	322
1100	307
1100	295
1100	311
1100	302
1100	313
1100	309
1100	310
1100	305
1100	307
1200	318
1200	326
1200	316
1200	325
1200	322
1200	318
1200	318
1200	312
1200	324
1200	319
1200	316
1200	320
1200	336
1200	321
1200	321
1200	313
1200	314
1200	338
1200	324
1200	328
1200	327
1200	322
1200	330
1200	322
1200	333
1200	313
1200	321
1200	309
1200	322
1200	313
1300	323
1300	340
1300	323
1300	336
1300	328
1300	319
1300	333
1300	330
1300	317
1300	331
1300	318
1300	325
1300	326
1300	328
1300	330
1300	322
1300	317
1300	325
1300	328
1300	339
1300	324
1300	336
1300	320
1300	337
1300	337
1300	330
1300	322
1300	326
1300	338
1300	324
1400	330
1400	338
1400	334
1400	330
1400	334
1400	337
1400	350
1400	338
1400	341
1400	337
1400	335
1400	320
1400	336
1400	347
1400	349
1400	335
1400	337
1400	346
1400	334
1400	326
1400	337
1400	342
1400	342
1400	341
1400	333
1400	341
1400	342
1400	332
1400	343
1400	338
1500	334
1500	353
1500	348
1500	348
1500	351
1500	347
1500	349
1500	346
1500	351
1500	334
1500	355
1500	336
1500	330
1500	337
1500	344
1500	329
1500	349
1500	335
1500	341
1500	342
1500	336
1500	347
1500	347
1500	350
1500	344
1500	346
1500	345
1500	348
1500	336
1500	338
1600	353
1600	355
1600	362
1600	351
1600	355
1600	349
1600	341
1600	358
1600	354
1600	349
1600	341
1600	345
1600	354
1600	344
1600	357
1600	354
1600	353
1600	352
1600	343
1600	348
1600	362
1600	355
1600	344
1600	348
1600	357
1600	351
1600	358
1600	349
1600	350
1600	353
1700	353
1700	357
1700	366
1700	355
1700	364
1700	360
1700	354
1700	361
1700	361
1700	355
1700	360
1700	364
1700	358
1700	353
1700	361
1700	354
1700	354
1700	355
1700	356
1700	361
1700	361
1700	357
1700	361
1700	357
1700	356
1700	361
1700	348
1700	357
1700	360
1700	362
1800	367
1800	363
1800	362
1800	370
1800	358
1800	363
1800	361
1800	357
1800	366
1800	361
1800	357
1800	370
1800	366
1800	359
1800	362
1800	368
1800	361
1800	358
1800	365
1800	362
1800	367
1800	365
1800	367
1800	355
1800	369
1800	365
1800	371
1800	367
1800	364
1800	361
1900	367
1900	373
1900	372
1900	368
1900	374
1900	370
1900	370
1900	371
1900	373
1900	373
1900	368
1900	369
1900	370
1900	371
1900	377
1900	373
1900	374
1900	372
1900	373
1900	370
1900	367
1900	375
1900	366
1900	374
1900	368
1900	369
1900	372
1900	370
1900	375
1900	370
2000	376
2000	379
2000	375
2000	373
2000	374
2000	374
2000	374
2000	378
2000	377
2000	378
2000	379
2000	375
2000	374
2000	376
2000	375
2000	372
2000	379
2000	377
2000	375
2000	377
2000	376
2000	376
2000	375
2000	374
2000	379
2000	374
2000	378
2000	376
2000	375
2000	376

## Sheet: ST6d
Supplementary Table 6d |Number of wells according to the ASV purity in Fig. 6d.
Purity	Percentage	count
100	44.766	928
95	33.382	692
90	4.342	90
85	2.46	51
80	2.219	46
75	2.364	49
70	1.785	37
65	1.592	33
60	1.785	37
55	1.447	30
50	1.93	40
45	0.482	10
40	0.386	8
35	0.434	9
30	0.048	1
25	0.193	4
20	0.048	1
15	0.241	5
10	0.096	2
5	0	0
0	0	0
	100
>95	78.148
Other	21.852

## Sheet: ST6e
Supplementary Table 6e | Well purity in a 96-well cell culture plate ( plate L1P13 ) containing cultivated bacteria, as an example, in Fig. 6e
Plate	1	2	3	4	5	6	7	8	9	10	11	12
A	0	99.65	100	0	99.7	0	99.72	0	86.36	0	0	0
B	100	0	0	100	0	93.55	0	0	0	94.15	80.98	96.44
C	0	0	0	100	0	0	0	80.55	100	52.45	0	73.68
D	99.85	99.6	0	99.51	0	0	82.5	100	0	0	0	0
E	100	0	99.48	100	100	0	0	0	0	0	0	0
F	0	0	0	100	0	99.52	0	100	99.87	100	0	82.08
G	0	0	99.59	100	76.42	0	75.12	0	0	100	0	0
H	0	0	0	99.79	0	0	0	99.54	0	0	0	0

## Sheet: ST6f
Supplementary Table 6f |Taxonomy, color code and occurrence frequency of cultivated bacteria in Fig. 6f.
p__Proteobacteria.c__Betaproteobacteria.Burkholderiales.f__Burkholderiales_incertae_sedis.g__Unassigned.ASV_1
p__Proteobacteria.c__Betaproteobacteria.Burkholderiales.f__Burkholderiales_incertae_sedis.g__Piscinibacter.ASV_2
p__Proteobacteria.c__Betaproteobacteria.Burkholderiales.f__Comamonadaceae.g__Kinneretia.ASV_3
p__Proteobacteria.c__Betaproteobacteria.Burkholderiales.f__Comamonadaceae.g__Acidovorax.ASV_5
p__Proteobacteria.c__Betaproteobacteria.Burkholderiales.f__Comamonadaceae.g__Hydrogenophaga.ASV_4
p__Proteobacteria.c__Alphaproteobacteria.Rhizobiales.f__Bradyrhizobiaceae.g__Bradyrhizobium.ASV_8
p__Proteobacteria.c__Alphaproteobacteria.Rhizobiales.f__Bradyrhizobiaceae.g__Bosea.ASV_11
p__Proteobacteria.c__Betaproteobacteria.Burkholderiales.f__Burkholderiales_incertae_sedis.g__Piscinibacter.ASV_6
p__Proteobacteria.c__Gammaproteobacteria.Xanthomonadales.f__Xanthomonadaceae.g__Pseudoxanthomonas.ASV_7
p__Proteobacteria.c__Gammaproteobacteria.Enterobacteriales.f__Enterobacteriaceae.g__Escherichia/Shigella.ASV_10
p__Proteobacteria.c__Alphaproteobacteria.Rhizobiales.f__Bradyrhizobiaceae.g__Bradyrhizobium.ASV_13
p__Proteobacteria.c__Betaproteobacteria.Methylophilales.f__Methylophilaceae.g__Methylophilus.ASV_9
p__Proteobacteria.c__Alphaproteobacteria.Rhizobiales.f__Bradyrhizobiaceae.g__Bradyrhizobium.ASV_14
p__Proteobacteria.c__Betaproteobacteria.Burkholderiales.f__Comamonadaceae.g__Unassigned.ASV_19
p__Actinobacteria.c__Actinobacteria.Actinomycetales.f__Microbacteriaceae.g__Microbacterium.ASV_12
p__Proteobacteria.c__Gammaproteobacteria.Xanthomonadales.f__Xanthomonadaceae.g__Lysobacter.ASV_17
p__Proteobacteria.c__Alphaproteobacteria.Sphingomonadales.f__Sphingomonadaceae.g__Novosphingobium.ASV_30
p__Proteobacteria.c__Betaproteobacteria.Burkholderiales.f__Comamonadaceae.g__Kinneretia.ASV_16
p__Proteobacteria.c__Alphaproteobacteria.Rhizobiales.f__Unassigned.g__Unassigned.ASV_20
p__Proteobacteria.c__Betaproteobacteria.Rhodocyclales.f__Rhodocyclaceae.g__Methyloversatilis.ASV_18
p__Actinobacteria.c__Actinobacteria.Actinomycetales.f__Microbacteriaceae.g__Microbacterium.ASV_21
p__Proteobacteria.c__Betaproteobacteria.Burkholderiales.f__Comamonadaceae.g__Kinneretia.ASV_15
p__Proteobacteria.c__Alphaproteobacteria.Rhizobiales.f__Bradyrhizobiaceae.g__Bosea.ASV_26
p__Proteobacteria.c__Gammaproteobacteria.Xanthomonadales.f__Xanthomonadaceae.g__Pseudoxanthomonas.ASV_22
p__Actinobacteria.c__Actinobacteria.Actinomycetales.f__Nocardioidaceae.g__Nocardioides.ASV_29
p__Proteobacteria.c__Betaproteobacteria.Burkholderiales.f__Burkholderiales_incertae_sedis.g__Unassigned.ASV_25
p__Proteobacteria.c__Betaproteobacteria.Burkholderiales.f__Comamonadaceae.g__Acidovorax.ASV_24
p__Proteobacteria.c__Alphaproteobacteria.Rhizobiales.f__Hyphomicrobiaceae.g__Devosia.ASV_31
p__Proteobacteria.c__Betaproteobacteria.Rhodocyclales.f__Rhodocyclaceae.g__Uliginosibacterium.ASV_23
p__Proteobacteria.c__Betaproteobacteria.Rhodocyclales.f__Rhodocyclaceae.g__Propionivibrio.ASV_45
p__Actinobacteria.c__Actinobacteria.Actinomycetales.f__Microbacteriaceae.g__Microbacterium.ASV_32
p__Proteobacteria.c__Gammaproteobacteria.Xanthomonadales.f__Xanthomonadaceae.g__Luteimonas.ASV_27
p__Proteobacteria.c__Alphaproteobacteria.Rhizobiales.f__Unassigned.g__Unassigned.ASV_54
p__Proteobacteria.c__Alphaproteobacteria.Sphingomonadales.f__Sphingomonadaceae.g__Novosphingobium.ASV_33
p__Proteobacteria.c__Gammaproteobacteria.Xanthomonadales.f__Sinobacteraceae.g__Steroidobacter.ASV_34
p__Proteobacteria.c__Betaproteobacteria.Burkholderiales.f__Comamonadaceae.g__Pelomonas.ASV_58
p__Proteobacteria.c__Betaproteobacteria.Rhodocyclales.f__Rhodocyclaceae.g__Azospira.ASV_28
p__Proteobacteria.c__Betaproteobacteria.Burkholderiales.f__Unassigned.g__Unassigned.ASV_41
p__Proteobacteria.c__Gammaproteobacteria.Aeromonadales.f__Aeromonadaceae.g__Aeromonas.ASV_39
p__Proteobacteria.c__Alphaproteobacteria.Sphingomonadales.f__Sphingomonadaceae.g__Novosphingobium.ASV_73
p__Proteobacteria.c__Betaproteobacteria.Burkholderiales.f__Unassigned.g__Unassigned.ASV_44
p__Actinobacteria.c__Actinobacteria.Actinomycetales.f__Nocardioidaceae.g__Marmoricola.ASV_37
p__Actinobacteria.c__Actinobacteria.Actinomycetales.f__Microbacteriaceae.g__Agromyces.ASV_36
p__Actinobacteria.c__Actinobacteria.Actinomycetales.f__Microbacteriaceae.g__Microbacterium.ASV_38
p__Proteobacteria.c__Alphaproteobacteria.Sphingomonadales.f__Sphingomonadaceae.g__Novosphingobium.ASV_68
p__Proteobacteria.c__Alphaproteobacteria.Rhizobiales.f__Unassigned.g__Unassigned.ASV_48
p__Proteobacteria.c__Betaproteobacteria.Burkholderiales.f__Comamonadaceae.g__Hydrogenophaga.ASV_35
p__Proteobacteria.c__Gammaproteobacteria.Pseudomonadales.f__Pseudomonadaceae.g__Pseudomonas.ASV_47
p__Bacteroidetes.c__Sphingobacteriia.Sphingobacteriales.f__Chitinophagaceae.g__Unassigned.ASV_146
p__Proteobacteria.c__Betaproteobacteria.Rhodocyclales.f__Rhodocyclaceae.g__Georgfuchsia.ASV_75
p__Actinobacteria.c__Actinobacteria.Actinomycetales.f__Microbacteriaceae.g__Agromyces.ASV_42
p__Proteobacteria.c__Alphaproteobacteria.Sneathiellales.f__Sneathiellaceae.g__Ferrovibrio.ASV_51
p__Proteobacteria.c__Betaproteobacteria.Burkholderiales.f__Comamonadaceae.g__Curvibacter.ASV_49
p__Proteobacteria.c__Betaproteobacteria.Burkholderiales.f__Comamonadaceae.g__Unassigned.ASV_40
p__Proteobacteria.c__Betaproteobacteria.Rhodocyclales.f__Rhodocyclaceae.g__Azospira.ASV_66
p__Firmicutes.c__Bacilli.Bacillales.f__Bacillales_Incertae_Sedis_XII.g__Exiguobacterium.ASV_59
p__Proteobacteria.c__Alphaproteobacteria.Rhizobiales.f__Rhizobiales_incertae_sedis.g__Phreatobacter.ASV_64
p__Proteobacteria.c__Alphaproteobacteria.Rhizobiales.f__Rhizobiaceae.g__Rhizobium.ASV_50
p__Actinobacteria.c__Actinobacteria.Actinomycetales.f__Cellulomonadaceae.g__Cellulomonas.ASV_53
p__Proteobacteria.c__Gammaproteobacteria.Aeromonadales.f__Aeromonadaceae.g__Aeromonas.ASV_52
p__Proteobacteria.c__Betaproteobacteria.Burkholderiales.f__Burkholderiales_incertae_sedis.g__Rubrivivax.ASV_56
p__Proteobacteria.c__Alphaproteobacteria.Caulobacterales.f__Caulobacteraceae.g__Brevundimonas.ASV_46
p__Proteobacteria.c__Gammaproteobacteria.Aeromonadales.f__Aeromonadaceae.g__Aeromonas.ASV_60
p__Proteobacteria.c__Betaproteobacteria.Rhodocyclales.f__Rhodocyclaceae.g__Dechloromonas.ASV_65
p__Bacteroidetes.c__Flavobacteriia.Flavobacteriales.f__Flavobacteriaceae.g__Chryseobacterium.ASV_69
p__Proteobacteria.c__Alphaproteobacteria.Sphingomonadales.f__Erythrobacteraceae.g__Altererythrobacter.ASV_67
p__Proteobacteria.c__Alphaproteobacteria.Rhizobiales.f__Bradyrhizobiaceae.g__Bradyrhizobium.ASV_126
p__Proteobacteria.c__Alphaproteobacteria.Rhizobiales.f__Unassigned.g__Unassigned.ASV_237
p__Actinobacteria.c__Actinobacteria.Actinomycetales.f__Nocardioidaceae.g__Marmoricola.ASV_128
p__Proteobacteria.c__Alphaproteobacteria.Rhizobiales.f__Bradyrhizobiaceae.g__Unassigned.ASV_55
p__Actinobacteria.c__Actinobacteria.Actinomycetales.f__Intrasporangiaceae.g__Unassigned.ASV_83
p__Proteobacteria.c__Betaproteobacteria.Burkholderiales.f__Unassigned.g__Unassigned.ASV_72
p__Actinobacteria.c__Actinobacteria.Actinomycetales.f__Cellulomonadaceae.g__Cellulomonas.ASV_134
p__Proteobacteria.c__Betaproteobacteria.Burkholderiales.f__Unassigned.g__Unassigned.ASV_124
p__Proteobacteria.c__Betaproteobacteria.Rhodocyclales.f__Rhodocyclaceae.g__Azonexus.ASV_74
p__Actinobacteria.c__Actinobacteria.Actinomycetales.f__Micromonosporaceae.g__Micromonospora.ASV_109
p__Proteobacteria.c__Alphaproteobacteria.Sphingomonadales.f__Sphingomonadaceae.g__Sphingomonas.ASV_99
p__Proteobacteria.c__Betaproteobacteria.Rhodocyclales.f__Rhodocyclaceae.g__Azovibrio.ASV_62
p__Proteobacteria.c__Betaproteobacteria.Burkholderiales.f__Unassigned.g__Unassigned.ASV_87
p__Proteobacteria.c__Betaproteobacteria.Burkholderiales.f__Comamonadaceae.g__Unassigned.ASV_104
p__Proteobacteria.c__Alphaproteobacteria.Rhizobiales.f__Bradyrhizobiaceae.g__Bosea.ASV_108
p__Proteobacteria.c__Alphaproteobacteria.Rhizobiales.f__Methylobacteriaceae.g__Microvirga.ASV_97
p__Proteobacteria.c__Betaproteobacteria.Burkholderiales.f__Burkholderiales_incertae_sedis.g__Unassigned.ASV_92
p__Proteobacteria.c__Alphaproteobacteria.Sphingomonadales.f__Sphingomonadaceae.g__Blastomonas.ASV_137
p__Proteobacteria.c__Alphaproteobacteria.Sneathiellales.f__Sneathiellaceae.g__Ferrovibrio.ASV_57
p__Proteobacteria.c__Alphaproteobacteria.Caulobacterales.f__Caulobacteraceae.g__Caulobacter.ASV_63
p__Proteobacteria.c__Gammaproteobacteria.Enterobacteriales.f__Enterobacteriaceae.g__Dickeya.ASV_78
p__Proteobacteria.c__Alphaproteobacteria.Rhizobiales.f__Unassigned.g__Unassigned.ASV_238
p__Actinobacteria.c__Actinobacteria.Actinomycetales.f__Nocardioidaceae.g__Nocardioides.ASV_133
p__Actinobacteria.c__Actinobacteria.Acidimicrobiales.f__Unassigned.g__Unassigned.ASV_162
p__Actinobacteria.c__Actinobacteria.Actinomycetales.f__Nocardioidaceae.g__Nocardioides.ASV_228
p__Proteobacteria.c__Alphaproteobacteria.Sneathiellales.f__Sneathiellaceae.g__Unassigned.ASV_107
p__Proteobacteria.c__Betaproteobacteria.Burkholderiales.f__Burkholderiales_incertae_sedis.g__Aquabacterium.ASV_110
p__Proteobacteria.c__Betaproteobacteria.Burkholderiales.f__Comamonadaceae.g__Acidovorax.ASV_43
p__Proteobacteria.c__Betaproteobacteria.Rhodocyclales.f__Rhodocyclaceae.g__Dechloromonas.ASV_163
p__Proteobacteria.c__Betaproteobacteria.Rhodocyclales.f__Rhodocyclaceae.g__Propionivibrio.ASV_71
p__Proteobacteria.c__Betaproteobacteria.Burkholderiales.f__Burkholderiales_incertae_sedis.g__Aquabacterium.ASV_85
p__Actinobacteria.c__Actinobacteria.Actinomycetales.f__Nocardioidaceae.g__Nocardioides.ASV_117
p__Bacteroidetes.c__Flavobacteriia.Flavobacteriales.f__Flavobacteriaceae.g__Flavobacterium.ASV_70
p__Actinobacteria.c__Actinobacteria.Actinomycetales.f__Microbacteriaceae.g__Agromyces.ASV_94
p__Proteobacteria.c__Alphaproteobacteria.Rhizobiales.f__Unassigned.g__Unassigned.ASV_103
p__Firmicutes.c__Bacilli.Bacillales.f__Bacillaceae_1.g__Fictibacillus.ASV_190
p__Proteobacteria.c__Gammaproteobacteria.Pseudomonadales.f__Pseudomonadaceae.g__Rhizobacter.ASV_113
p__Proteobacteria.c__Alphaproteobacteria.Rhizobiales.f__Rhizobiaceae.g__Ensifer.ASV_86
p__Proteobacteria.c__Alphaproteobacteria.Rhodobacterales.f__Rhodobacteraceae.g__Paracoccus.ASV_77
p__Actinobacteria.c__Actinobacteria.Actinomycetales.f__Micrococcaceae.g__Kocuria.ASV_81
p__Actinobacteria.c__Actinobacteria.Actinomycetales.f__Microbacteriaceae.g__Microbacterium.ASV_90
p__Actinobacteria.c__Actinobacteria.Actinomycetales.f__Nocardioidaceae.g__Nocardioides.ASV_95
p__Proteobacteria.c__Gammaproteobacteria.Pseudomonadales.f__Pseudomonadaceae.g__Pseudomonas.ASV_79
p__Actinobacteria.c__Actinobacteria.Actinomycetales.f__Microbacteriaceae.g__Microbacterium.ASV_105
p__Actinobacteria.c__Actinobacteria.Solirubrobacterales.f__Conexibacteraceae.g__Conexibacter.ASV_193
p__Proteobacteria.c__Gammaproteobacteria.Aeromonadales.f__Aeromonadaceae.g__Aeromonas.ASV_100
p__Proteobacteria.c__Betaproteobacteria.Burkholderiales.f__Burkholderiales_incertae_sedis.g__Unassigned.ASV_80
p__Proteobacteria.c__Betaproteobacteria.Burkholderiales.f__Comamonadaceae.g__Acidovorax.ASV_89
p__Proteobacteria.c__Gammaproteobacteria.Pseudomonadales.f__Pseudomonadaceae.g__Pseudomonas.ASV_76
p__Proteobacteria.c__Betaproteobacteria.Rhodocyclales.f__Rhodocyclaceae.g__Unassigned.ASV_158
p__Actinobacteria.c__Actinobacteria.Actinomycetales.f__Micrococcaceae.g__Arthrobacter.ASV_127
p__Firmicutes.c__Bacilli.Bacillales.f__Bacillales_Incertae_Sedis_XII.g__Exiguobacterium.ASV_136
p__Proteobacteria.c__Betaproteobacteria.Burkholderiales.f__Burkholderiales_incertae_sedis.g__Unassigned.ASV_93
p__Proteobacteria.c__Alphaproteobacteria.Rhizobiales.f__Methylobacteriaceae.g__Microvirga.ASV_147
p__Actinobacteria.c__Actinobacteria.Actinomycetales.f__Thermomonosporaceae.g__Unassigned.ASV_189
p__Actinobacteria.c__Actinobacteria.Actinomycetales.f__Nocardioidaceae.g__Nocardioides.ASV_115
p__Actinobacteria.c__Actinobacteria.Actinomycetales.f__Unassigned.g__Unassigned.ASV_268
p__Proteobacteria.c__Alphaproteobacteria.Rhizobiales.f__Rhizobiaceae.g__Kaistia.ASV_112
p__Actinobacteria.c__Actinobacteria.Actinomycetales.f__Cellulomonadaceae.g__Actinotalea.ASV_121
p__Actinobacteria.c__Actinobacteria.Actinomycetales.f__Unassigned.g__Unassigned.ASV_167
p__Proteobacteria.c__Alphaproteobacteria.Caulobacterales.f__Caulobacteraceae.g__Caulobacter.ASV_84
p__Proteobacteria.c__Betaproteobacteria.Burkholderiales.f__Burkholderiaceae.g__Chitinimonas.ASV_166
p__Bacteroidetes.c__Flavobacteriia.Flavobacteriales.f__Flavobacteriaceae.g__Chryseobacterium.ASV_114
p__Actinobacteria.c__Actinobacteria.Actinomycetales.f__Intrasporangiaceae.g__Aquipuribacter.ASV_120
p__Proteobacteria.c__Gammaproteobacteria.Pseudomonadales.f__Pseudomonadaceae.g__Pseudomonas.ASV_138
p__Proteobacteria.c__Alphaproteobacteria.Rhodospirillales.f__Rhodospirillaceae.g__Elstera.ASV_145
p__Proteobacteria.c__Betaproteobacteria.Burkholderiales.f__Burkholderiales_incertae_sedis.g__Unassigned.ASV_82
p__Proteobacteria.c__Alphaproteobacteria.Sphingomonadales.f__Sphingomonadaceae.g__Sphingomonas.ASV_141
p__Actinobacteria.c__Actinobacteria.Actinomycetales.f__Cellulomonadaceae.g__Actinotalea.ASV_129
p__Actinobacteria.c__Actinobacteria.Actinomycetales.f__Micromonosporaceae.g__Catellatospora.ASV_232
p__Firmicutes.c__Bacilli.Bacillales.f__Bacillaceae_1.g__Bacillus.ASV_96
p__Bacteroidetes.c__Sphingobacteriia.Sphingobacteriales.f__Chitinophagaceae.g__Flavihumibacter.ASV_192
p__Proteobacteria.c__Betaproteobacteria.Rhodocyclales.f__Rhodocyclaceae.g__Dechloromonas.ASV_153
p__Proteobacteria.c__Alphaproteobacteria.Sphingomonadales.f__Unassigned.g__Unassigned.ASV_123
p__Proteobacteria.c__Alphaproteobacteria.Sphingomonadales.f__Sphingomonadaceae.g__Sphingomonas.ASV_88
p__Proteobacteria.c__Betaproteobacteria.Rhodocyclales.f__Rhodocyclaceae.g__Azonexus.ASV_98
p__Proteobacteria.c__Alphaproteobacteria.Rhizobiales.f__Rhizobiaceae.g__Rhizobium.ASV_101
p__Proteobacteria.c__Alphaproteobacteria.Sphingomonadales.f__Sphingomonadaceae.g__Sphingobium.ASV_149
p__Proteobacteria.c__Alphaproteobacteria.Caulobacterales.f__Caulobacteraceae.g__Caulobacter.ASV_155
p__Actinobacteria.c__Actinobacteria.Actinomycetales.f__Nocardioidaceae.g__Nocardioides.ASV_106
p__Proteobacteria.c__Betaproteobacteria.Burkholderiales.f__Comamonadaceae.g__Ramlibacter.ASV_139
p__Actinobacteria.c__Actinobacteria.Actinomycetales.f__Microbacteriaceae.g__Microcella.ASV_140
p__Firmicutes.c__Bacilli.Bacillales.f__Planococcaceae.g__Chryseomicrobium.ASV_102
p__Proteobacteria.c__Alphaproteobacteria.Rhizobiales.f__Unassigned.g__Unassigned.ASV_296
p__Proteobacteria.c__Deltaproteobacteria.Myxococcales.f__Labilitrichaceae.g__Labilithrix.ASV_264
p__Proteobacteria.c__Alphaproteobacteria.Caulobacterales.f__Caulobacteraceae.g__Brevundimonas.ASV_183
p__Firmicutes.c__Bacilli.Bacillales.f__Bacillales_Incertae_Sedis_XII.g__Exiguobacterium.ASV_157
p__Proteobacteria.c__Alphaproteobacteria.Rhizobiales.f__Hyphomicrobiaceae.g__Hyphomicrobium.ASV_250
p__Proteobacteria.c__Betaproteobacteria.Burkholderiales.f__Comamonadaceae.g__Unassigned.ASV_125
p__Proteobacteria.c__Alphaproteobacteria.Rhizobiales.f__Rhizobiaceae.g__Ensifer.ASV_132
p__Proteobacteria.c__Alphaproteobacteria.Caulobacterales.f__Caulobacteraceae.g__Phenylobacterium.ASV_111
p__Actinobacteria.c__Actinobacteria.Actinomycetales.f__Demequinaceae.g__Lysinimicrobium.ASV_116
p__Actinobacteria.c__Actinobacteria.Actinomycetales.f__Microbacteriaceae.g__Agromyces.ASV_187
p__Proteobacteria.c__Betaproteobacteria.Burkholderiales.f__Comamonadaceae.g__Acidovorax.ASV_196
p__Proteobacteria.c__Alphaproteobacteria.Sphingomonadales.f__Sphingomonadaceae.g__Novosphingobium.ASV_130
p__Proteobacteria.c__Alphaproteobacteria.Sphingomonadales.f__Erythrobacteraceae.g__Porphyrobacter.ASV_175
p__Proteobacteria.c__Alphaproteobacteria.Caulobacterales.f__Hyphomonadaceae.g__Hyphomonas.ASV_202
p__Proteobacteria.c__Alphaproteobacteria.Rhizobiales.f__Methylocystaceae.g__Pleomorphomonas.ASV_119
p__Proteobacteria.c__Betaproteobacteria.Burkholderiales.f__Burkholderiales_incertae_sedis.g__Unassigned.ASV_240
p__Actinobacteria.c__Actinobacteria.Actinomycetales.f__Mycobacteriaceae.g__Mycobacterium.ASV_135
p__Proteobacteria.c__Betaproteobacteria.Burkholderiales.f__Burkholderiales_incertae_sedis.g__Unassigned.ASV_150
p__Proteobacteria.c__Alphaproteobacteria.Sphingomonadales.f__Sphingomonadaceae.g__Sphingobium.ASV_251
p__Firmicutes.c__Bacilli.Bacillales.f__Bacillaceae_1.g__Bacillus.ASV_152
p__Proteobacteria.c__Alphaproteobacteria.Sphingomonadales.f__Sphingomonadaceae.g__Sphingomonas.ASV_245
p__Actinobacteria.c__Actinobacteria.Actinomycetales.f__Demequinaceae.g__Demequina.ASV_224
p__Proteobacteria.c__Gammaproteobacteria.Enterobacteriales.f__Enterobacteriaceae.g__Escherichia/Shigella.ASV_185
p__Proteobacteria.c__Alphaproteobacteria.Rhodospirillales.f__Rhodospirillaceae.g__Unassigned.ASV_194
p__Actinobacteria.c__Actinobacteria.Actinomycetales.f__Micromonosporaceae.g__Micromonospora.ASV_220
p__Proteobacteria.c__Alphaproteobacteria.Sneathiellales.f__Sneathiellaceae.g__Ferrovibrio.ASV_178
p__Actinobacteria.c__Actinobacteria.Actinomycetales.f__Microbacteriaceae.g__Agrococcus.ASV_222
p__Actinobacteria.c__Actinobacteria.Actinomycetales.f__Geodermatophilaceae.g__Blastococcus.ASV_273
p__Actinobacteria.c__Actinobacteria.Actinomycetales.f__Unassigned.g__Unassigned.ASV_234
p__Proteobacteria.c__Alphaproteobacteria.Rhizobiales.f__Bradyrhizobiaceae.g__Bosea.ASV_198
p__Proteobacteria.c__Gammaproteobacteria.Xanthomonadales.f__Xanthomonadaceae.g__Unassigned.ASV_154
p__Proteobacteria.c__Gammaproteobacteria.Pseudomonadales.f__Pseudomonadaceae.g__Pseudomonas.ASV_169
p__Proteobacteria.c__Betaproteobacteria.Rhodocyclales.f__Rhodocyclaceae.g__Unassigned.ASV_179
p__Proteobacteria.c__Betaproteobacteria.Burkholderiales.f__Burkholderiales_incertae_sedis.g__Unassigned.ASV_191
p__Actinobacteria.c__Actinobacteria.Actinomycetales.f__Streptosporangiaceae.g__Streptosporangium.ASV_215
p__Proteobacteria.c__Alphaproteobacteria.Rhizobiales.f__Phyllobacteriaceae.g__Mesorhizobium.ASV_131
p__Proteobacteria.c__Betaproteobacteria.Rhodocyclales.f__Rhodocyclaceae.g__Unassigned.ASV_230
p__Proteobacteria.c__Betaproteobacteria.Burkholderiales.f__Burkholderiales_incertae_sedis.g__Unassigned.ASV_148
p__Deinococcus-Thermus.c__Deinococci.Deinococcales.f__Deinococcaceae.g__Deinococcus.ASV_188
p__Proteobacteria.c__Betaproteobacteria.Burkholderiales.f__Burkholderiales_incertae_sedis.g__Unassigned.ASV_341
p__Proteobacteria.c__Alphaproteobacteria.Rhizobiales.f__Unassigned.g__Unassigned.ASV_292
p__Firmicutes.c__Bacilli.Bacillales.f__Bacillaceae_1.g__Bacillus.ASV_265
p__Proteobacteria.c__Alphaproteobacteria.Sphingomonadales.f__Sphingomonadaceae.g__Sandaracinobacter.ASV_256
p__Actinobacteria.c__Actinobacteria.Actinomycetales.f__Nocardioidaceae.g__Nocardioides.ASV_212
p__Proteobacteria.c__Alphaproteobacteria.Rhizobiales.f__Unassigned.g__Unassigned.ASV_313
p__Actinobacteria.c__Actinobacteria.Solirubrobacterales.f__Unassigned.g__Unassigned.ASV_309
p__Proteobacteria.c__Alphaproteobacteria.Rhodospirillales.f__Unassigned.g__Reyranella.ASV_201
p__Proteobacteria.c__Betaproteobacteria.Burkholderiales.f__Comamonadaceae.g__Acidovorax.ASV_303
p__Proteobacteria.c__Betaproteobacteria.Burkholderiales.f__Oxalobacteraceae.g__Unassigned.ASV_174
p__Proteobacteria.c__Alphaproteobacteria.Rhizobiales.f__Rhizobiaceae.g__Rhizobium.ASV_200
p__Proteobacteria.c__Alphaproteobacteria.Rhodospirillales.f__Unassigned.g__Reyranella.ASV_118
p__Proteobacteria.c__Alphaproteobacteria.Rhodospirillales.f__Unassigned.g__Reyranella.ASV_91
p__Proteobacteria.c__Alphaproteobacteria.Sphingomonadales.f__Erythrobacteraceae.g__Porphyrobacter.ASV_221
p__Actinobacteria.c__Actinobacteria.Actinomycetales.f__Intrasporangiaceae.g__Unassigned.ASV_346
p__Actinobacteria.c__Actinobacteria.Actinomycetales.f__Intrasporangiaceae.g__Unassigned.ASV_287
p__Proteobacteria.c__Alphaproteobacteria.Rhizobiales.f__Unassigned.g__Unassigned.ASV_276
p__Proteobacteria.c__Betaproteobacteria.Rhodocyclales.f__Rhodocyclaceae.g__Unassigned.ASV_182
p__Actinobacteria.c__Actinobacteria.Actinomycetales.f__Streptosporangiaceae.g__Nonomuraea.ASV_186
p__Proteobacteria.c__Betaproteobacteria.Burkholderiales.f__Burkholderiales_incertae_sedis.g__Unassigned.ASV_170
p__Actinobacteria.c__Actinobacteria.Solirubrobacterales.f__Unassigned.g__Unassigned.ASV_263
p__Proteobacteria.c__Gammaproteobacteria.Xanthomonadales.f__Xanthomonadaceae.g__Lysobacter.ASV_122
p__Firmicutes.c__Bacilli.Bacillales.f__Planococcaceae.g__Unassigned.ASV_142
p__Actinobacteria.c__Actinobacteria.Actinomycetales.f__Microbacteriaceae.g__Microbacterium.ASV_210
p__Actinobacteria.c__Actinobacteria.Actinomycetales.f__Unassigned.g__Unassigned.ASV_168
p__Proteobacteria.c__Betaproteobacteria.Rhodocyclales.f__Rhodocyclaceae.g__Uliginosibacterium.ASV_205
p__Proteobacteria.c__Alphaproteobacteria.Rhizobiales.f__Bradyrhizobiaceae.g__Bosea.ASV_261
p__Proteobacteria.c__Alphaproteobacteria.Rhizobiales.f__Xanthobacteraceae.g__Unassigned.ASV_164
p__Proteobacteria.c__Alphaproteobacteria.Sphingomonadales.f__Sphingomonadaceae.g__Sphingomonas.ASV_184
p__Actinobacteria.c__Actinobacteria.Actinomycetales.f__Nocardioidaceae.g__Nocardioides.ASV_165
p__Proteobacteria.c__Alphaproteobacteria.Sphingomonadales.f__Sphingomonadaceae.g__Sphingomonas.ASV_143
p__Deinococcus-Thermus.c__Deinococci.Deinococcales.f__Deinococcaceae.g__Deinococcus.ASV_156
p__Actinobacteria.c__Actinobacteria.Actinomycetales.f__Streptosporangiaceae.g__Nonomuraea.ASV_160
p__Proteobacteria.c__Betaproteobacteria.Rhodocyclales.f__Rhodocyclaceae.g__Azonexus.ASV_172
p__Proteobacteria.c__Alphaproteobacteria.Sphingomonadales.f__Sphingomonadaceae.g__Sphingomonas.ASV_176
p__Proteobacteria.c__Betaproteobacteria.Burkholderiales.f__Burkholderiales_incertae_sedis.g__Unassigned.ASV_181
p__Proteobacteria.c__Alphaproteobacteria.Rhodospirillales.f__Acetobacteraceae.g__Roseomonas.ASV_197
p__Proteobacteria.c__Alphaproteobacteria.Rhizobiales.f__Unassigned.g__Unassigned.ASV_209
p__Proteobacteria.c__Betaproteobacteria.Rhodocyclales.f__Rhodocyclaceae.g__Unassigned.ASV_213
p__Bacteroidetes.c__Sphingobacteriia.Sphingobacteriales.f__Chitinophagaceae.g__Lacibacter.ASV_214
p__Actinobacteria.c__Actinobacteria.Actinomycetales.f__Microbacteriaceae.g__Unassigned.ASV_219
p__Proteobacteria.c__Betaproteobacteria.Rhodocyclales.f__Rhodocyclaceae.g__Propionivibrio.ASV_242
p__Firmicutes.c__Bacilli.Bacillales.f__Bacillaceae_1.g__Bacillus.ASV_258
p__Bacteroidetes.c__Sphingobacteriia.Sphingobacteriales.f__Chitinophagaceae.g__Flavihumibacter.ASV_275
p__Actinobacteria.c__Actinobacteria.Actinomycetales.f__Propionibacteriaceae.g__Propionicimonas.ASV_282
p__Proteobacteria.c__Betaproteobacteria.Burkholderiales.f__Unassigned.g__Unassigned.ASV_284
p__Acidobacteria.c__Holophagae.Holophagales.f__Holophagaceae.g__Geothrix.ASV_294
p__Proteobacteria.c__Alphaproteobacteria.Rhizobiales.f__Unassigned.g__Unassigned.ASV_308
p__Actinobacteria.c__Actinobacteria.Actinomycetales.f__Nocardioidaceae.g__Nocardioides.ASV_314
p__Actinobacteria.c__Actinobacteria.Actinomycetales.f__Micromonosporaceae.g__Micromonospora.ASV_319
p__Actinobacteria.c__Actinobacteria.Actinomycetales.f__Nocardiaceae.g__Nocardia.ASV_322
p__Proteobacteria.c__Alphaproteobacteria.Sphingomonadales.f__Sphingomonadaceae.g__Sphingomonas.ASV_328
p__Proteobacteria.c__Alphaproteobacteria.Rhizobiales.f__Unassigned.g__Unassigned.ASV_336
p__Proteobacteria.c__Gammaproteobacteria.Xanthomonadales.f__Xanthomonadaceae.g__Silanimonas.ASV_361
p__Actinobacteria.c__Actinobacteria.Actinomycetales.f__Unassigned.g__Unassigned.ASV_364
p__Chloroflexi.c__Chloroflexia.Chloroflexales.f__Oscillochloridaceae.g__Oscillochloris.ASV_365
p__Actinobacteria.c__Actinobacteria.Actinomycetales.f__Mycobacteriaceae.g__Mycobacterium.ASV_366
p__Proteobacteria.c__Alphaproteobacteria.Rhizobiales.f__Unassigned.g__Unassigned.ASV_374
p__Proteobacteria.c__Alphaproteobacteria.Rhizobiales.f__Unassigned.g__Unassigned.ASV_206
p__Proteobacteria.c__Betaproteobacteria.Rhodocyclales.f__Rhodocyclaceae.g__Sulfurisoma.ASV_280
p__Proteobacteria.c__Betaproteobacteria.Rhodocyclales.f__Rhodocyclaceae.g__Azonexus.ASV_171
p__Proteobacteria.c__Alphaproteobacteria.Sneathiellales.f__Sneathiellaceae.g__Ferrovibrio.ASV_144
p__Proteobacteria.c__Alphaproteobacteria.Rhizobiales.f__Hyphomicrobiaceae.g__Hyphomicrobium.ASV_225
p__Proteobacteria.c__Alphaproteobacteria.Sneathiellales.f__Sneathiellaceae.g__Ferrovibrio.ASV_243
p__Proteobacteria.c__Alphaproteobacteria.Sphingomonadales.f__Sphingomonadaceae.g__Sphingomonas.ASV_241
p__Actinobacteria.c__Actinobacteria.Actinomycetales.f__Unassigned.g__Unassigned.ASV_180
p__Proteobacteria.c__Betaproteobacteria.Rhodocyclales.f__Rhodocyclaceae.g__Dechloromonas.ASV_204
p__Proteobacteria.c__Betaproteobacteria.Burkholderiales.f__Comamonadaceae.g__Acidovorax.ASV_207
p__Proteobacteria.c__Betaproteobacteria.Burkholderiales.f__Unassigned.g__Unassigned.ASV_177
p__Proteobacteria.c__Alphaproteobacteria.Rhizobiales.f__Methylobacteriaceae.g__Microvirga.ASV_267
p__Actinobacteria.c__Actinobacteria.Actinomycetales.f__Nocardioidaceae.g__Unassigned.ASV_218
p__Proteobacteria.c__Alphaproteobacteria.Sphingomonadales.f__Sphingomonadaceae.g__Sphingomonas.ASV_217
p__Actinobacteria.c__Actinobacteria.Actinomycetales.f__Micromonosporaceae.g__Micromonospora.ASV_310
p__Proteobacteria.c__Alphaproteobacteria.Rhizobiales.f__Unassigned.g__Unassigned.ASV_233
p__Proteobacteria.c__Deltaproteobacteria.Myxococcales.f__Labilitrichaceae.g__Labilithrix.ASV_316
p__Actinobacteria.c__Actinobacteria.Actinomycetales.f__Nocardioidaceae.g__Marmoricola.ASV_231
p__Proteobacteria.c__Alphaproteobacteria.Sphingomonadales.f__Sphingomonadaceae.g__Unassigned.ASV_253
p__Bacteroidetes.c__Bacteroidia.Bacteroidales.f__Porphyromonadaceae.g__Acetobacteroides.ASV_356
p__Proteobacteria.c__Gammaproteobacteria.Xanthomonadales.f__Sinobacteraceae.g__Steroidobacter.ASV_338
p__Proteobacteria.c__Betaproteobacteria.Burkholderiales.f__Unassigned.g__Unassigned.ASV_293
p__Bacteroidetes.c__Flavobacteriia.Flavobacteriales.f__Flavobacteriaceae.g__Flavobacterium.ASV_271
p__Proteobacteria.c__Gammaproteobacteria.Aeromonadales.f__Aeromonadaceae.g__Aeromonas.ASV_199
p__Deinococcus-Thermus.c__Deinococci.Deinococcales.f__Deinococcaceae.g__Deinococcus.ASV_325
p__Proteobacteria.c__Alphaproteobacteria.Sphingomonadales.f__Sphingomonadaceae.g__Sphingomonas.ASV_269
p__Proteobacteria.c__Alphaproteobacteria.Rhizobiales.f__Hyphomicrobiaceae.g__Devosia.ASV_307
p__Actinobacteria.c__Actinobacteria.Actinomycetales.f__Microbacteriaceae.g__Curtobacterium.ASV_161
p__Firmicutes.c__Bacilli.Bacillales.f__Planococcaceae.g__Lysinibacillus.ASV_257
p__Bacteroidetes.c__Flavobacteriia.Flavobacteriales.f__Flavobacteriaceae.g__Flavobacterium.ASV_229
p__Proteobacteria.c__Alphaproteobacteria.Rhodobacterales.f__Rhodobacteraceae.g__Paracoccus.ASV_246
p__Proteobacteria.c__Alphaproteobacteria.Rhizobiales.f__Rhizobiaceae.g__Rhizobium.ASV_223
p__Proteobacteria.c__Alphaproteobacteria.Rhizobiales.f__Rhizobiaceae.g__Unassigned.ASV_283
p__Bacteroidetes.c__Flavobacteriia.Flavobacteriales.f__Flavobacteriaceae.g__Flavobacterium.ASV_208
p__Actinobacteria.c__Actinobacteria.Actinomycetales.f__Streptosporangiaceae.g__Streptosporangium.ASV_236
p__Proteobacteria.c__Alphaproteobacteria.Rhizobiales.f__Unassigned.g__Unassigned.ASV_289
p__Actinobacteria.c__Actinobacteria.Actinomycetales.f__Cellulomonadaceae.g__Unassigned.ASV_216
p__Actinobacteria.c__Actinobacteria.Actinomycetales.f__Mycobacteriaceae.g__Mycobacterium.ASV_244
p__Deinococcus-Thermus.c__Deinococci.Deinococcales.f__Deinococcaceae.g__Deinococcus.ASV_272
p__Actinobacteria.c__Actinobacteria.Actinomycetales.f__Streptosporangiaceae.g__Streptosporangium.ASV_262
p__Proteobacteria.c__Alphaproteobacteria.Sphingomonadales.f__Sphingomonadaceae.g__Sphingomonas.ASV_277
p__Proteobacteria.c__Alphaproteobacteria.Rhodospirillales.f__Rhodospirillaceae.g__Azospirillum.ASV_248
p__Actinobacteria.c__Actinobacteria.Actinomycetales.f__Microbacteriaceae.g__Microbacterium.ASV_290
p__Proteobacteria.c__Gammaproteobacteria.Enterobacteriales.f__Enterobacteriaceae.g__Pantoea.ASV_239
p__Proteobacteria.c__Betaproteobacteria.Burkholderiales.f__Burkholderiales_incertae_sedis.g__Unassigned.ASV_345
p__Proteobacteria.c__Gammaproteobacteria.Pseudomonadales.f__Pseudomonadaceae.g__Pseudomonas.ASV_278
p__Proteobacteria.c__Alphaproteobacteria.Rhizobiales.f__Methylocystaceae.g__Pleomorphomonas.ASV_235
p__Proteobacteria.c__Gammaproteobacteria.Enterobacteriales.f__Enterobacteriaceae.g__Pantoea.ASV_254
p__Proteobacteria.c__Alphaproteobacteria.Rhizobiales.f__Unassigned.g__Unassigned.ASV_344
p__Proteobacteria.c__Gammaproteobacteria.Xanthomonadales.f__Xanthomonadaceae.g__Unassigned.ASV_279
p__Proteobacteria.c__Alphaproteobacteria.Rhizobiales.f__Methylobacteriaceae.g__Microvirga.ASV_249
p__Proteobacteria.c__Alphaproteobacteria.Caulobacterales.f__Caulobacteraceae.g__Brevundimonas.ASV_270
p__Actinobacteria.c__Actinobacteria.Actinomycetales.f__Nocardioidaceae.g__Nocardioides.ASV_291
p__Proteobacteria.c__Betaproteobacteria.Rhodocyclales.f__Rhodocyclaceae.g__Azoarcus.ASV_259
p__Proteobacteria.c__Alphaproteobacteria.Sphingomonadales.f__Sphingomonadaceae.g__Sphingomonas.ASV_252
p__Proteobacteria.c__Betaproteobacteria.Burkholderiales.f__Burkholderiales_incertae_sedis.g__Aquabacterium.ASV_281
p__Proteobacteria.c__Alphaproteobacteria.Rhizobiales.f__Hyphomicrobiaceae.g__Ancalomicrobium.ASV_285
p__Proteobacteria.c__Betaproteobacteria.Burkholderiales.f__Oxalobacteraceae.g__Unassigned.ASV_274
p__Bacteroidetes.c__Flavobacteriia.Flavobacteriales.f__Flavobacteriaceae.g__Cloacibacterium.ASV_323
p__Actinobacteria.c__Actinobacteria.Actinomycetales.f__Brevibacteriaceae.g__Brevibacterium.ASV_247
p__Firmicutes.c__Bacilli.Bacillales.f__Paenibacillaceae_1.g__Paenibacillus.ASV_321
p__Firmicutes.c__Bacilli.Bacillales.f__Thermoactinomycetaceae_1.g__Unassigned.ASV_304
p__Proteobacteria.c__Alphaproteobacteria.Rhizobiales.f__Rhizobiaceae.g__Ensifer.ASV_255
p__Actinobacteria.c__Actinobacteria.Actinomycetales.f__Nocardioidaceae.g__Nocardioides.ASV_195
p__Actinobacteria.c__Actinobacteria.Actinomycetales.f__Nocardioidaceae.g__Nocardioides.ASV_203
p__Actinobacteria.c__Actinobacteria.Actinomycetales.f__Brevibacteriaceae.g__Brevibacterium.ASV_260
p__Firmicutes.c__Bacilli.Bacillales.f__Thermoactinomycetaceae_1.g__Unassigned.ASV_306
p__Proteobacteria.c__Betaproteobacteria.Rhodocyclales.f__Rhodocyclaceae.g__Unassigned.ASV_302
p__Proteobacteria.c__Betaproteobacteria.Burkholderiales.f__Comamonadaceae.g__Unassigned.ASV_211
p__Actinobacteria.c__Actinobacteria.Actinomycetales.f__Nocardioidaceae.g__Nocardioides.ASV_288
p__Proteobacteria.c__Betaproteobacteria.Rhodocyclales.f__Rhodocyclaceae.g__Azonexus.ASV_301
p__Firmicutes.c__Bacilli.Bacillales.f__Bacillales_Incertae_Sedis_XII.g__Exiguobacterium.ASV_305
p__Proteobacteria.c__Deltaproteobacteria.Myxococcales.f__Labilitrichaceae.g__Labilithrix.ASV_353
p__Firmicutes.c__Bacilli.Bacillales.f__Bacillales_Incertae_Sedis_XII.g__Exiguobacterium.ASV_266
p__Proteobacteria.c__Betaproteobacteria.Burkholderiales.f__Unassigned.g__Unassigned.ASV_375
p__Actinobacteria.c__Actinobacteria.Actinomycetales.f__Micrococcaceae.g__Arthrobacter.ASV_298
p__Proteobacteria.c__Alphaproteobacteria.Sphingomonadales.f__Sphingomonadaceae.g__Blastomonas.ASV_300
p__Proteobacteria.c__Betaproteobacteria.Rhodocyclales.f__Rhodocyclaceae.g__Dechloromonas.ASV_295
p__Proteobacteria.c__Betaproteobacteria.Neisseriales.f__Neisseriaceae.g__Neisseria.ASV_376
p__Proteobacteria.c__Alphaproteobacteria.Rhizobiales.f__Hyphomicrobiaceae.g__Ancalomicrobium.ASV_299
p__Actinobacteria.c__Actinobacteria.Actinomycetales.f__Nocardiaceae.g__Rhodococcus.ASV_286
p__Proteobacteria.c__Alphaproteobacteria.Sphingomonadales.f__Sphingomonadaceae.g__Sphingobium.ASV_330
p__Bacteroidetes.c__Flavobacteriia.Flavobacteriales.f__Flavobacteriaceae.g__Cloacibacterium.ASV_335
p__Proteobacteria.c__Alphaproteobacteria.Rhizobiales.f__Methylocystaceae.g__Pleomorphomonas.ASV_342
p__Firmicutes.c__Bacilli.Bacillales.f__Bacillales_Incertae_Sedis_XII.g__Exiguobacterium.ASV_326
p__Actinobacteria.c__Actinobacteria.Actinomycetales.f__Unassigned.g__Unassigned.ASV_327
p__Proteobacteria.c__Gammaproteobacteria.Pseudomonadales.f__Pseudomonadaceae.g__Pseudomonas.ASV_320
p__Proteobacteria.c__Alphaproteobacteria.Rhodospirillales.f__Rhodospirillaceae.g__Azospirillum.ASV_333
p__Bacteroidetes.c__Flavobacteriia.Flavobacteriales.f__Flavobacteriaceae.g__Flavobacterium.ASV_297
p__Firmicutes.c__Bacilli.Bacillales.f__Paenibacillaceae_1.g__Paenibacillus.ASV_359
p__Proteobacteria.c__Gammaproteobacteria.Pseudomonadales.f__Pseudomonadaceae.g__Pseudomonas.ASV_363
p__Proteobacteria.c__Gammaproteobacteria.Enterobacteriales.f__Enterobacteriaceae.g__Escherichia/Shigella.ASV_312
p__Proteobacteria.c__Betaproteobacteria.Burkholderiales.f__Oxalobacteraceae.g__Unassigned.ASV_332
p__Proteobacteria.c__Betaproteobacteria.Burkholderiales.f__Oxalobacteraceae.g__Unassigned.ASV_339
p__Proteobacteria.c__Alphaproteobacteria.Rhizobiales.f__Methylobacteriaceae.g__Microvirga.ASV_354
p__Actinobacteria.c__Actinobacteria.Actinomycetales.f__Nocardioidaceae.g__Nocardioides.ASV_311
p__Actinobacteria.c__Actinobacteria.Actinomycetales.f__Streptosporangiaceae.g__Streptosporangium.ASV_329
p__Actinobacteria.c__Actinobacteria.Actinomycetales.f__Streptomycetaceae.g__Streptomyces.ASV_315
p__Proteobacteria.c__Gammaproteobacteria.Pseudomonadales.f__Moraxellaceae.g__Acinetobacter.ASV_358
p__Proteobacteria.c__Alphaproteobacteria.Rhizobiales.f__Phyllobacteriaceae.g__Mesorhizobium.ASV_377
p__Firmicutes.c__Bacilli.Bacillales.f__Bacillales_Incertae_Sedis_XII.g__Exiguobacterium.ASV_349
p__Proteobacteria.c__Alphaproteobacteria.Sneathiellales.f__Sneathiellaceae.g__Taonella.ASV_351
p__Proteobacteria.c__Gammaproteobacteria.Enterobacteriales.f__Enterobacteriaceae.g__Pantoea.ASV_334
p__Proteobacteria.c__Gammaproteobacteria.Enterobacteriales.f__Enterobacteriaceae.g__Pantoea.ASV_343
p__Proteobacteria.c__Gammaproteobacteria.Enterobacteriales.f__Enterobacteriaceae.g__Pantoea.ASV_331
p__Actinobacteria.c__Actinobacteria.Actinomycetales.f__Streptosporangiaceae.g__Streptosporangium.ASV_373
p__Proteobacteria.c__Gammaproteobacteria.Enterobacteriales.f__Enterobacteriaceae.g__Pantoea.ASV_318
p__Actinobacteria.c__Actinobacteria.Actinomycetales.f__Kineosporiaceae.g__Pseudokineococcus.ASV_340
p__Firmicutes.c__Bacilli.Bacillales.f__Paenibacillaceae_1.g__Paenibacillus.ASV_368
p__Firmicutes.c__Bacilli.Bacillales.f__Paenibacillaceae_1.g__Paenibacillus.ASV_372
p__Proteobacteria.c__Alphaproteobacteria.Rhodospirillales.f__Rhodospirillaceae.g__Azospirillum.ASV_350
p__Firmicutes.c__Bacilli.Bacillales.f__Bacillales_Incertae_Sedis_XII.g__Exiguobacterium.ASV_357
p__Firmicutes.c__Bacilli.Bacillales.f__Bacillales_Incertae_Sedis_XII.g__Exiguobacterium.ASV_360
p__Proteobacteria.c__Gammaproteobacteria.Enterobacteriales.f__Enterobacteriaceae.g__Escherichia/Shigella.ASV_348
p__Proteobacteria.c__Gammaproteobacteria.Xanthomonadales.f__Xanthomonadaceae.g__Lysobacter.ASV_352
p__Actinobacteria.c__Actinobacteria.Acidimicrobiales.f__Iamiaceae.g__Aquihabitans.ASV_381
p__Actinobacteria.c__Actinobacteria.Actinomycetales.f__Streptomycetaceae.g__Streptomyces.ASV_347
p__Actinobacteria.c__Actinobacteria.Actinomycetales.f__Nocardioidaceae.g__Nocardioides.ASV_355
p__Proteobacteria.c__Alphaproteobacteria.Rhizobiales.f__Methylobacteriaceae.g__Microvirga.ASV_369
p__Actinobacteria.c__Actinobacteria.Actinomycetales.f__Micrococcaceae.g__Arthrobacter.ASV_379
p__Proteobacteria.c__Alphaproteobacteria.Rhodobacterales.f__Rhodobacteraceae.g__Paracoccus.ASV_380
p__Proteobacteria.c__Alphaproteobacteria.Rhizobiales.f__Methylobacteriaceae.g__Microvirga.ASV_370
p__Actinobacteria.c__Actinobacteria.Actinomycetales.f__Nocardiaceae.g__Rhodococcus.ASV_378
# global tree options
ignore_branch_len	0
total_plotted_degrees	360
start_rotation	-96
clade_separation	0
branch_bracket_depth	0.8
branch_bracket_width	0.5
branch_thickness	0.75
#branch_color
#branch_color_from_ancestor
# global graphical options
annotation_background_width	0.6
#annotation_background_alpha
annotation_background_separation	-0.5
#annotation_background_offset
#annotation_legend_font_size
# detailed tree options
clade_marker_size	16
## clad_marker_shap is default
#clade_marker_shape
## clay_marker_edge_width
clade_marker_edge_width	0.25
## clay_marker_edge_color is default
#clade_marker_edge_color
## clade_marker_font_color is default black
#clade_marker_font_color
# detailed annotation (need modifications)
## annotation, rotation, annotation_background_color
## clay_mark_color and branch color (need modifications)
### phylum level
p__Actinobacteria*	clade_marker_color	#EF5656
p__Proteobacteria*	clade_marker_color	#2BB065
p__Bacteroidetes*	clade_marker_color	#47B3DA
p__Firmicutes*	clade_marker_color	#F7A415
#### phylum level
p__Proteobacteria	annotation_background_color	#B0FFC0
p__Actinobacteria	annotation_background_color	#FFB0B0
p__Bacteroidetes	annotation_background_color	#B0E9FD
p__Firmicutes	annotation_background_color	#FCDBA2
Burkholderiales	annotation	*
Burkholderiales	annotation_rotation	90
Burkholderiales	annotation_background_color	#85F29B
Rhizobiales	annotation	*
Rhizobiales	annotation_rotation	90
Rhizobiales	annotation_background_color	#85F29B
Xanthomonadales	annotation	*
Xanthomonadales	annotation_rotation	90
Xanthomonadales	annotation_background_color	#85F29B
Enterobacteriales	annotation	*
Enterobacteriales	annotation_rotation	90
Enterobacteriales	annotation_background_color	#85F29B
Methylophilales	annotation	*
Methylophilales	annotation_rotation	90
Methylophilales	annotation_background_color	#85F29B
Actinomycetales	annotation	*
Actinomycetales	annotation_rotation	90
Actinomycetales	annotation_background_color	#F58D8D
Sphingomonadales	annotation	*
Sphingomonadales	annotation_rotation	90
Sphingomonadales	annotation_background_color	#85F29B
Rhodocyclales	annotation	*
Rhodocyclales	annotation_rotation	90
Rhodocyclales	annotation_background_color	#85F29B
Aeromonadales	annotation	*
Aeromonadales	annotation_rotation	90
Aeromonadales	annotation_background_color	#85F29B
Pseudomonadales	annotation	*
Pseudomonadales	annotation_rotation	90
Pseudomonadales	annotation_background_color	#85F29B
Sphingobacteriales	annotation	*
Sphingobacteriales	annotation_rotation	90
Sphingobacteriales	annotation_background_color	#91DBF6
Sneathiellales	annotation	*
Sneathiellales	annotation_rotation	90
Sneathiellales	annotation_background_color	#85F29B
Bacillales	annotation	*
Bacillales	annotation_rotation	90
Bacillales	annotation_background_color	#F7C875
Caulobacterales	annotation	*
Caulobacterales	annotation_rotation	90
Caulobacterales	annotation_background_color	#85F29B
Flavobacteriales	annotation	*
Flavobacteriales	annotation_rotation	90
Flavobacteriales	annotation_background_color	#91DBF6
Acidimicrobiales	annotation	*
Acidimicrobiales	annotation_rotation	90
Acidimicrobiales	annotation_background_color	#F58D8D
Rhodobacterales	annotation	*
Rhodobacterales	annotation_rotation	90
Rhodobacterales	annotation_background_color	#85F29B
Solirubrobacterales	annotation	*
Solirubrobacterales	annotation_rotation	90
Solirubrobacterales	annotation_background_color	#F58D8D
Rhodospirillales	annotation	*
Rhodospirillales	annotation_rotation	90
Rhodospirillales	annotation_background_color	#85F29B
Myxococcales	annotation	*
Myxococcales	annotation_rotation	90
Myxococcales	annotation_background_color	#85F29B
Deinococcales	annotation	*
Deinococcales	annotation_rotation	90
Deinococcales	annotation_background_color	grey
Holophagales	annotation	*
Holophagales	annotation_rotation	90
Holophagales	annotation_background_color	grey
Chloroflexales	annotation	*
Chloroflexales	annotation_rotation	90
Chloroflexales	annotation_background_color	grey
Bacteroidales	annotation	*
Bacteroidales	annotation_rotation	90
Bacteroidales	annotation_background_color	#91DBF6
Neisseriales	annotation	*
Neisseriales	annotation_rotation	90
Neisseriales	annotation_background_color	#85F29B
ring_internal_separator_thickness	3	0.5
ring_width	3	1
ring_color	3	green
ASV_1	ring_alpha	3	1
ASV_2	ring_alpha	3	0.394928
ASV_3	ring_alpha	3	0.375172
ASV_5	ring_alpha	3	0.25453
ASV_4	ring_alpha	3	0.251331
ASV_8	ring_alpha	3	0.130306
ASV_11	ring_alpha	3	0.121008
ASV_6	ring_alpha	3	0.117443
ASV_7	ring_alpha	3	0.104625
ASV_10	ring_alpha	3	0.0907726
ASV_13	ring_alpha	3	0.0862413
ASV_9	ring_alpha	3	0.0856791
ASV_14	ring_alpha	3	0.0775553
ASV_19	ring_alpha	3	0.0751547
ASV_12	ring_alpha	3	0.0724506
ASV_17	ring_alpha	3	0.0689087
ASV_30	ring_alpha	3	0.0652319
ASV_16	ring_alpha	3	0.0650408
ASV_20	ring_alpha	3	0.0564504
ASV_18	ring_alpha	3	0.0553204
ASV_21	ring_alpha	3	0.0478487
ASV_15	ring_alpha	3	0.0477476
ASV_26	ring_alpha	3	0.0414341
ASV_22	ring_alpha	3	0.0379428
ASV_29	ring_alpha	3	0.0365991
ASV_25	ring_alpha	3	0.0350194
ASV_24	ring_alpha	3	0.0331641
ASV_31	ring_alpha	3	0.0321465
ASV_23	ring_alpha	3	0.0293749
ASV_45	ring_alpha	3	0.0271711
ASV_32	ring_alpha	3	0.0269855
ASV_27	ring_alpha	3	0.0264571
ASV_54	ring_alpha	3	0.0247255
ASV_33	ring_alpha	3	0.0247255
ASV_34	ring_alpha	3	0.0240902
ASV_58	ring_alpha	3	0.023663
ASV_28	ring_alpha	3	0.0234043
ASV_41	ring_alpha	3	0.0218414
ASV_39	ring_alpha	3	0.0198681
ASV_73	ring_alpha	3	0.0198344
ASV_44	ring_alpha	3	0.0198006
ASV_37	ring_alpha	3	0.0192047
ASV_36	ring_alpha	3	0.0177149
ASV_38	ring_alpha	3	0.0176193
ASV_68	ring_alpha	3	0.0171133
ASV_48	ring_alpha	3	0.0166861
ASV_35	ring_alpha	3	0.0162138
ASV_47	ring_alpha	3	0.0155729
ASV_146	ring_alpha	3	0.0153312
ASV_75	ring_alpha	3	0.0153143
ASV_42	ring_alpha	3	0.0149826
ASV_51	ring_alpha	3	0.0149151
ASV_49	ring_alpha	3	0.0147015
ASV_40	ring_alpha	3	0.0146453
ASV_66	ring_alpha	3	0.0141843
ASV_59	ring_alpha	3	0.0140493
ASV_64	ring_alpha	3	0.0139706
ASV_50	ring_alpha	3	0.0137289
ASV_53	ring_alpha	3	0.013549
ASV_52	ring_alpha	3	0.0134028
ASV_56	ring_alpha	3	0.012925
ASV_46	ring_alpha	3	0.0125483
ASV_60	ring_alpha	3	0.0124021
ASV_65	ring_alpha	3	0.0121323
ASV_69	ring_alpha	3	0.0119636
ASV_67	ring_alpha	3	0.0115419
ASV_126	ring_alpha	3	0.0110135
ASV_237	ring_alpha	3	0.0109797
ASV_128	ring_alpha	3	0.0108898
ASV_55	ring_alpha	3	0.0108729
ASV_83	ring_alpha	3	0.010828
ASV_72	ring_alpha	3	0.0107492
ASV_134	ring_alpha	3	0.0104963
ASV_124	ring_alpha	3	0.0104288
ASV_74	ring_alpha	3	0.00947305
ASV_109	ring_alpha	3	0.00935499
ASV_99	ring_alpha	3	0.00915822
ASV_62	ring_alpha	3	0.00886588
ASV_87	ring_alpha	3	0.00845547
ASV_104	ring_alpha	3	0.00844423
ASV_108	ring_alpha	3	0.0084105
ASV_97	ring_alpha	3	0.00839925
ASV_92	ring_alpha	3	0.00832617
ASV_137	ring_alpha	3	0.00830368
ASV_57	ring_alpha	3	0.0082587
ASV_63	ring_alpha	3	0.00825308
ASV_78	ring_alpha	3	0.00824746
ASV_238	ring_alpha	3	0.00818562
ASV_133	ring_alpha	3	0.00815751
ASV_162	ring_alpha	3	0.00814626
ASV_228	ring_alpha	3	0.00814064
ASV_107	ring_alpha	3	0.00810129
ASV_110	ring_alpha	3	0.00810129
ASV_43	ring_alpha	3	0.00805069
ASV_163	ring_alpha	3	0.00805069
ASV_71	ring_alpha	3	0.00800571
ASV_85	ring_alpha	3	0.00800009
ASV_117	ring_alpha	3	0.00797198
ASV_70	ring_alpha	3	0.00790452
ASV_94	ring_alpha	3	0.00786516
ASV_103	ring_alpha	3	0.00771337
ASV_190	ring_alpha	3	0.00760655
ASV_113	ring_alpha	3	0.0073367
ASV_86	ring_alpha	3	0.00722988
ASV_77	ring_alpha	3	0.00720177
ASV_81	ring_alpha	3	0.00704997
ASV_90	ring_alpha	3	0.00680261
ASV_95	ring_alpha	3	0.00670703
ASV_79	ring_alpha	3	0.00664519
ASV_105	ring_alpha	3	0.00646529
ASV_193	ring_alpha	3	0.00645967
ASV_100	ring_alpha	3	0.00643156
ASV_80	ring_alpha	3	0.00593682
ASV_89	ring_alpha	3	0.00589747
ASV_76	ring_alpha	3	0.00575692
ASV_158	ring_alpha	3	0.00559388
ASV_127	ring_alpha	3	0.00556577
ASV_136	ring_alpha	3	0.0055489
ASV_93	ring_alpha	3	0.00554328
ASV_147	ring_alpha	3	0.00552641
ASV_189	ring_alpha	3	0.00549268
ASV_115	ring_alpha	3	0.00549268
ASV_268	ring_alpha	3	0.00548144
ASV_112	ring_alpha	3	0.00547582
ASV_121	ring_alpha	3	0.00545895
ASV_167	ring_alpha	3	0.00544771
ASV_84	ring_alpha	3	0.00543646
ASV_166	ring_alpha	3	0.00543646
ASV_114	ring_alpha	3	0.00542522
ASV_120	ring_alpha	3	0.00542522
ASV_138	ring_alpha	3	0.00542522
ASV_145	ring_alpha	3	0.00542522
ASV_82	ring_alpha	3	0.0054196
ASV_141	ring_alpha	3	0.0054196
ASV_129	ring_alpha	3	0.00540273
ASV_232	ring_alpha	3	0.00539711
ASV_96	ring_alpha	3	0.00537462
ASV_192	ring_alpha	3	0.00536338
ASV_153	ring_alpha	3	0.00536338
ASV_123	ring_alpha	3	0.00535213
ASV_88	ring_alpha	3	0.00532402
ASV_98	ring_alpha	3	0.00530716
ASV_101	ring_alpha	3	0.00521721
ASV_149	ring_alpha	3	0.00521158
ASV_155	ring_alpha	3	0.00513288
ASV_106	ring_alpha	3	0.00502044
ASV_139	ring_alpha	3	0.00461003
ASV_140	ring_alpha	3	0.00451446
ASV_102	ring_alpha	3	0.00436829
ASV_296	ring_alpha	3	0.00435704
ASV_264	ring_alpha	3	0.00432331
ASV_183	ring_alpha	3	0.00416589
ASV_157	ring_alpha	3	0.00407032
ASV_250	ring_alpha	3	0.00407032
ASV_125	ring_alpha	3	0.00399161
ASV_132	ring_alpha	3	0.00398037
ASV_111	ring_alpha	3	0.00386231
ASV_116	ring_alpha	3	0.00378922
ASV_187	ring_alpha	3	0.00377798
ASV_196	ring_alpha	3	0.00375549
ASV_130	ring_alpha	3	0.00374424
ASV_175	ring_alpha	3	0.00358121
ASV_202	ring_alpha	3	0.00348563
ASV_119	ring_alpha	3	0.00339006
ASV_240	ring_alpha	3	0.00337319
ASV_135	ring_alpha	3	0.00333946
ASV_150	ring_alpha	3	0.00323827
ASV_251	ring_alpha	3	0.00311458
ASV_152	ring_alpha	3	0.00310896
ASV_245	ring_alpha	3	0.00301901
ASV_224	ring_alpha	3	0.00299652
ASV_185	ring_alpha	3	0.0029909
ASV_194	ring_alpha	3	0.00296279
ASV_220	ring_alpha	3	0.00291219
ASV_178	ring_alpha	3	0.00290095
ASV_222	ring_alpha	3	0.00290095
ASV_273	ring_alpha	3	0.00288408
ASV_234	ring_alpha	3	0.00285035
ASV_198	ring_alpha	3	0.00285035
ASV_154	ring_alpha	3	0.00284473
ASV_169	ring_alpha	3	0.00282224
ASV_179	ring_alpha	3	0.00281662
ASV_191	ring_alpha	3	0.00281662
ASV_215	ring_alpha	3	0.00281099
ASV_131	ring_alpha	3	0.00281099
ASV_230	ring_alpha	3	0.00281099
ASV_148	ring_alpha	3	0.00279975
ASV_188	ring_alpha	3	0.00279413
ASV_341	ring_alpha	3	0.00279413
ASV_292	ring_alpha	3	0.00278851
ASV_265	ring_alpha	3	0.00278288
ASV_256	ring_alpha	3	0.00277726
ASV_212	ring_alpha	3	0.00277726
ASV_313	ring_alpha	3	0.00277726
ASV_309	ring_alpha	3	0.00277164
ASV_201	ring_alpha	3	0.00276602
ASV_303	ring_alpha	3	0.0027604
ASV_174	ring_alpha	3	0.00275477
ASV_200	ring_alpha	3	0.00274915
ASV_118	ring_alpha	3	0.00274353
ASV_91	ring_alpha	3	0.00273791
ASV_221	ring_alpha	3	0.00273791
ASV_346	ring_alpha	3	0.00273791
ASV_287	ring_alpha	3	0.00273229
ASV_276	ring_alpha	3	0.00273229
ASV_182	ring_alpha	3	0.00273229
ASV_186	ring_alpha	3	0.00273229
ASV_170	ring_alpha	3	0.00273229
ASV_263	ring_alpha	3	0.00273229
ASV_122	ring_alpha	3	0.00272666
ASV_142	ring_alpha	3	0.00272666
ASV_210	ring_alpha	3	0.00272666
ASV_168	ring_alpha	3	0.00272666
ASV_205	ring_alpha	3	0.00272104
ASV_261	ring_alpha	3	0.00272104
ASV_164	ring_alpha	3	0.00272104
ASV_184	ring_alpha	3	0.00272104
ASV_165	ring_alpha	3	0.00272104
ASV_143	ring_alpha	3	0.0027098
ASV_156	ring_alpha	3	0.0027098
ASV_160	ring_alpha	3	0.0027098
ASV_172	ring_alpha	3	0.0027098
ASV_176	ring_alpha	3	0.0027098
ASV_181	ring_alpha	3	0.0027098
ASV_197	ring_alpha	3	0.0027098
ASV_209	ring_alpha	3	0.0027098
ASV_213	ring_alpha	3	0.0027098
ASV_214	ring_alpha	3	0.0027098
ASV_219	ring_alpha	3	0.0027098
ASV_242	ring_alpha	3	0.0027098
ASV_258	ring_alpha	3	0.0027098
ASV_275	ring_alpha	3	0.0027098
ASV_282	ring_alpha	3	0.0027098
ASV_284	ring_alpha	3	0.0027098
ASV_294	ring_alpha	3	0.0027098
ASV_308	ring_alpha	3	0.0027098
ASV_314	ring_alpha	3	0.0027098
ASV_319	ring_alpha	3	0.0027098
ASV_322	ring_alpha	3	0.0027098
ASV_328	ring_alpha	3	0.0027098
ASV_336	ring_alpha	3	0.0027098
ASV_361	ring_alpha	3	0.0027098
ASV_364	ring_alpha	3	0.0027098
ASV_365	ring_alpha	3	0.0027098
ASV_366	ring_alpha	3	0.0027098
ASV_374	ring_alpha	3	0.0027098
ASV_206	ring_alpha	3	0.0027098
ASV_280	ring_alpha	3	0.0027098
ASV_171	ring_alpha	3	0.00270418
ASV_144	ring_alpha	3	0.00270418
ASV_225	ring_alpha	3	0.00270418
ASV_243	ring_alpha	3	0.00270418
ASV_241	ring_alpha	3	0.00270418
ASV_180	ring_alpha	3	0.00270418
ASV_204	ring_alpha	3	0.00269855
ASV_207	ring_alpha	3	0.00269855
ASV_177	ring_alpha	3	0.00269293
ASV_267	ring_alpha	3	0.00269293
ASV_218	ring_alpha	3	0.00269293
ASV_217	ring_alpha	3	0.00269293
ASV_310	ring_alpha	3	0.00269293
ASV_233	ring_alpha	3	0.00269293
ASV_316	ring_alpha	3	0.00268731
ASV_231	ring_alpha	3	0.00268731
ASV_253	ring_alpha	3	0.00266482
ASV_356	ring_alpha	3	0.00266482
ASV_338	ring_alpha	3	0.0026592
ASV_293	ring_alpha	3	0.0026592
ASV_271	ring_alpha	3	0.00264233
ASV_199	ring_alpha	3	0.00263671
ASV_325	ring_alpha	3	0.00261985
ASV_269	ring_alpha	3	0.0026086
ASV_307	ring_alpha	3	0.00258049
ASV_161	ring_alpha	3	0.00254114
ASV_257	ring_alpha	3	0.00246805
ASV_229	ring_alpha	3	0.00240059
ASV_246	ring_alpha	3	0.00239497
ASV_223	ring_alpha	3	0.00226004
ASV_283	ring_alpha	3	0.00224317
ASV_208	ring_alpha	3	0.00223755
ASV_236	ring_alpha	3	0.0021982
ASV_289	ring_alpha	3	0.00213636
ASV_216	ring_alpha	3	0.00209138
ASV_244	ring_alpha	3	0.00208014
ASV_272	ring_alpha	3	0.00207451
ASV_262	ring_alpha	3	0.00207451
ASV_277	ring_alpha	3	0.00205765
ASV_248	ring_alpha	3	0.00204078
ASV_290	ring_alpha	3	0.00200705
ASV_239	ring_alpha	3	0.00200705
ASV_345	ring_alpha	3	0.00197894
ASV_278	ring_alpha	3	0.00195645
ASV_235	ring_alpha	3	0.00192272
ASV_254	ring_alpha	3	0.0019171
ASV_344	ring_alpha	3	0.00191148
ASV_279	ring_alpha	3	0.00184963
ASV_249	ring_alpha	3	0.00183277
ASV_270	ring_alpha	3	0.00182715
ASV_291	ring_alpha	3	0.00182152
ASV_259	ring_alpha	3	0.00179904
ASV_252	ring_alpha	3	0.00179341
ASV_281	ring_alpha	3	0.00178779
ASV_285	ring_alpha	3	0.00175406
ASV_274	ring_alpha	3	0.00165286
ASV_323	ring_alpha	3	0.00146172
ASV_247	ring_alpha	3	0.00143361
ASV_321	ring_alpha	3	0.00142799
ASV_304	ring_alpha	3	0.00141674
ASV_255	ring_alpha	3	0.00138301
ASV_195	ring_alpha	3	0.00137739
ASV_203	ring_alpha	3	0.00133803
ASV_260	ring_alpha	3	0.00131555
ASV_306	ring_alpha	3	0.00129306
ASV_302	ring_alpha	3	0.00124808
ASV_211	ring_alpha	3	0.00124808
ASV_288	ring_alpha	3	0.00121435
ASV_301	ring_alpha	3	0.00119748
ASV_305	ring_alpha	3	0.00119748
ASV_353	ring_alpha	3	0.00115251
ASV_266	ring_alpha	3	0.00113564
ASV_375	ring_alpha	3	0.0011244
ASV_298	ring_alpha	3	0.00110753
ASV_300	ring_alpha	3	0.00110191
ASV_295	ring_alpha	3	0.00110191
ASV_376	ring_alpha	3	0.00104007
ASV_299	ring_alpha	3	0.00096136
ASV_286	ring_alpha	3	0.000899518
ASV_330	ring_alpha	3	0.000893896
ASV_335	ring_alpha	3	0.000854542
ASV_342	ring_alpha	3	0.000787078
ASV_326	ring_alpha	3	0.000758968
ASV_327	ring_alpha	3	0.000758968
ASV_320	ring_alpha	3	0.000753346
ASV_333	ring_alpha	3	0.000725237
ASV_297	ring_alpha	3	0.000680261
ASV_359	ring_alpha	3	0.000579065
ASV_363	ring_alpha	3	0.000567821
ASV_312	ring_alpha	3	0.000567821
ASV_332	ring_alpha	3	0.000500357
ASV_339	ring_alpha	3	0.000500357
ASV_354	ring_alpha	3	0.000500357
ASV_311	ring_alpha	3	0.000500357
ASV_329	ring_alpha	3	0.000472247
ASV_315	ring_alpha	3	0.000466625
ASV_358	ring_alpha	3	0.000449759
ASV_377	ring_alpha	3	0.000421649
ASV_349	ring_alpha	3	0.000410405
ASV_351	ring_alpha	3	0.000410405
ASV_334	ring_alpha	3	0.000393539
ASV_343	ring_alpha	3	0.000387917
ASV_331	ring_alpha	3	0.000371051
ASV_373	ring_alpha	3	0.000371051
ASV_318	ring_alpha	3	0.000354185
ASV_340	ring_alpha	3	0.000354185
ASV_368	ring_alpha	3	0.000354185
ASV_372	ring_alpha	3	0.000354185
ASV_350	ring_alpha	3	0.000331697
ASV_357	ring_alpha	3	0.000275477
ASV_360	ring_alpha	3	0.000264233
ASV_348	ring_alpha	3	0.000258611
ASV_352	ring_alpha	3	0.000236124
ASV_381	ring_alpha	3	0.00022488
ASV_347	ring_alpha	3	0.000208014
ASV_355	ring_alpha	3	0.00019677
ASV_369	ring_alpha	3	0.000174282
ASV_379	ring_alpha	3	0.00014055
ASV_380	ring_alpha	3	0.000129306
ASV_370	ring_alpha	3	8.99518e-05
ASV_378	ring_alpha	3	7.87078e-05
